# Supplementary material for: Redundant and Distinct Roles of Two 14-3-3 Proteins in Fusarium sacchari, Pathogen of Sugarcane Pokkah Boeng Disease
Source: MDPI journal article supplement (doi:10.3390/jof10040257), 2024-03-28
Supplement: s1 [file s1]

Table S5. Effect of *FsBmh* mutation or overexpression on the microspore morphology grown on PDA.

| Strain          | Spore length (μm)         | Spore width (μm)         |
|-----------------|---------------------------|--------------------------|
| WT              | 13.63 ± 0.54 <sup>b</sup> | 3.38 ± 0.21 <sup>a</sup> |
| ΔFsBmh1         | 17.92 ± 1.02 <sup>a</sup> | 2.35 ± 0.27 <sup>b</sup> |
| O-FsBmh1        | 13.92 ± 1.87 <sup>b</sup> | 3.35 ± 0.20 <sup>a</sup> |
| ΔFsBmh1/sFsBmh2 | 16.60 ± 1.70 <sup>a</sup> | 3.38 ± 0.12 <sup>a</sup> |
| C-ΔFsBmh1       | 14.05 ± 0.26 <sup>b</sup> | 3.44 ± 0.16 <sup>a</sup> |
| ΔFsBmh2         | 10.85 ± 0.70 <sup>c</sup> | 3.55 ± 0.15 <sup>a</sup> |
| O-FsBmh2        | 13.99 ± 1.26 <sup>b</sup> | 3.31 ± 0.17 <sup>a</sup> |
| ΔFsBmh2/sFsBmh1 | 10.79 ± 1.26 <sup>c</sup> | 2.54 ± 0.38 <sup>b</sup> |
| C-ΔFsBmh2       | 14.04 ± 0.61 <sup>b</sup> | 3.33 ± 0.14 <sup>a</sup> |
