# Supplementary material for: Redundant and Distinct Roles of Two 14-3-3 Proteins in Fusarium sacchari, Pathogen of Sugarcane Pokkah Boeng Disease
Source: MDPI journal article supplement (doi:10.3390/jof10040257), 2024-03-28
Supplement: s1 [file s1]

A

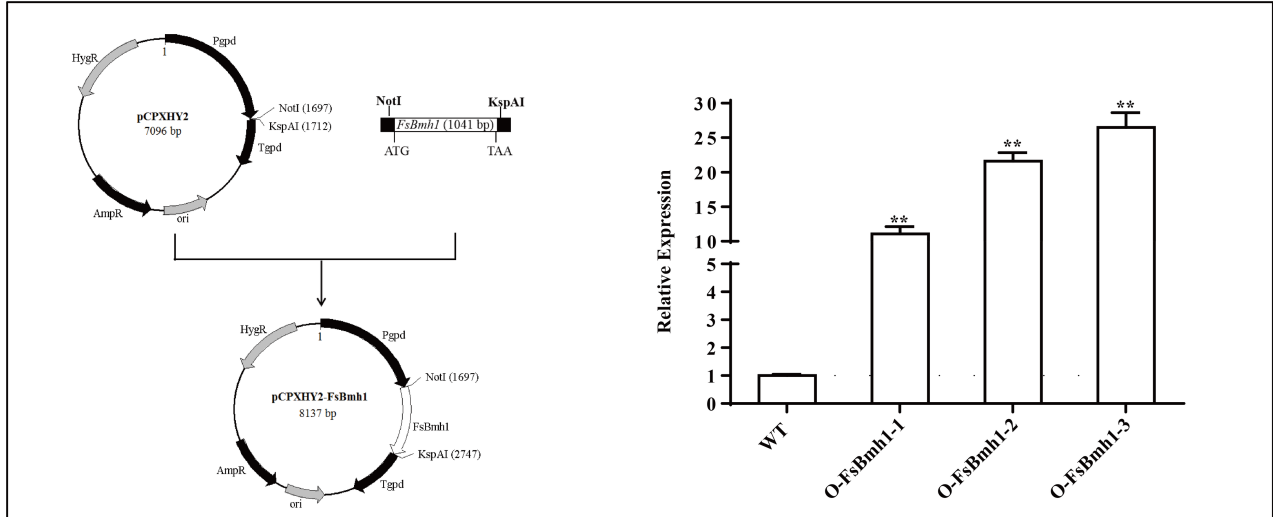

B

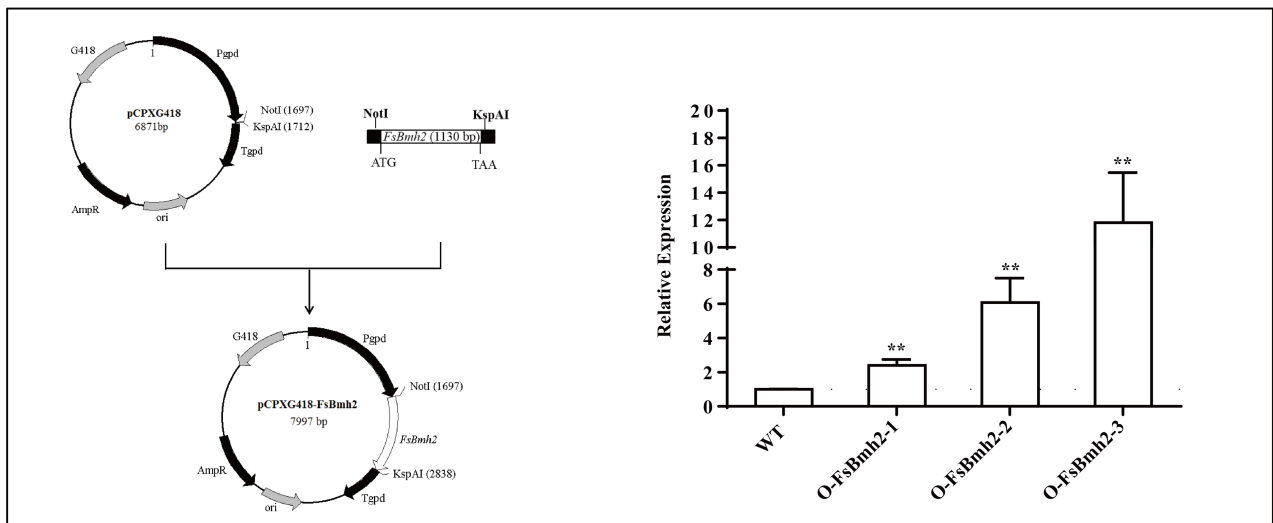

**Figure S5.** Generation of *FsBmh*- overexpression mutants. (A,B) overexpression *FsBmh1* and *FsBmh2* in wide type. *FsBmh*- overexpression vector was generated by insertion of the *FsBmh*- genes using in-fusion strategy (see Materials and Methods). *P*-value were calculated based on Student's T-test of replicate 2  $^{-\Delta\Delta CT}$  values between a sample and WT. \**P*<0.05, \*\**P*<0.01, \*\*\**P*<0.001.
