# Supplementary material for: Redundant and Distinct Roles of Two 14-3-3 Proteins in Fusarium sacchari, Pathogen of Sugarcane Pokkah Boeng Disease
Source: MDPI journal article supplement (doi:10.3390/jof10040257), 2024-03-28
Supplement: s1 [file s1]

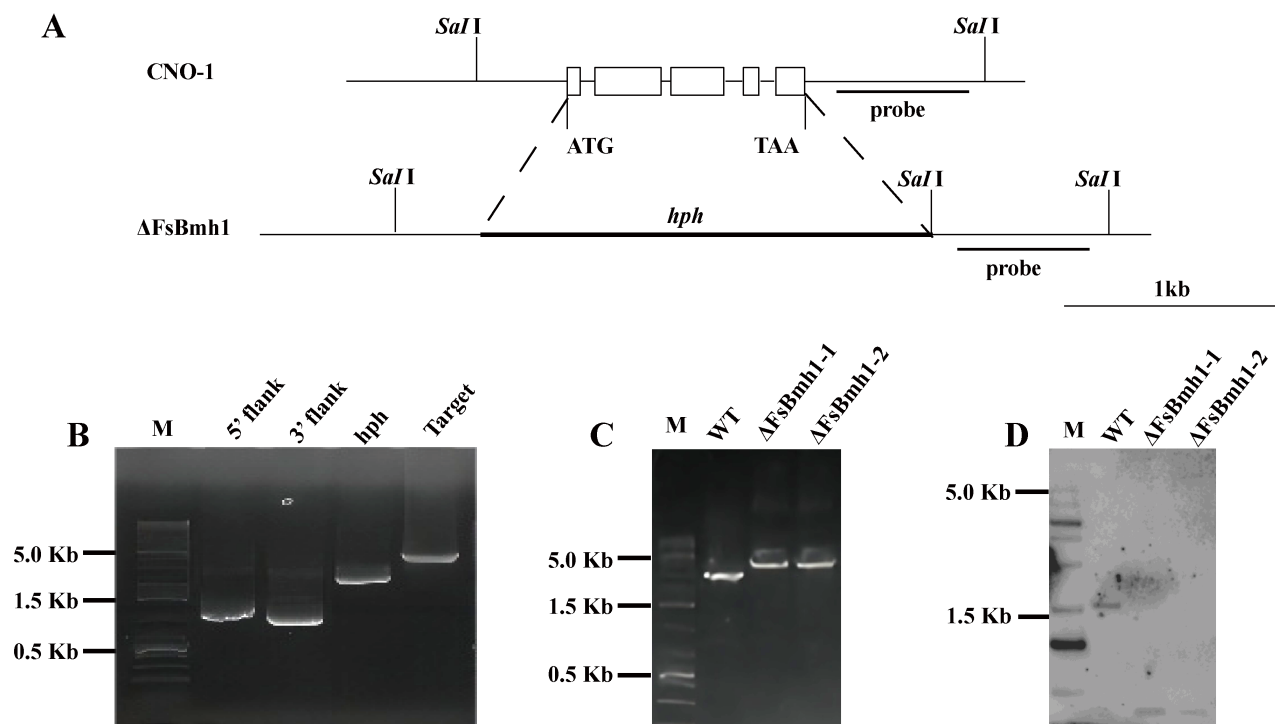

**Figure S2.** Generation of *FsBmh1* deletion mutants strains. (A,B) *FsBmh1* gene locus and gene replacement construct. (C) *FsBmh1* deletion mutants were validated by PCR with *FsBmh1*-A/B. (D) *FsBmh1* deletion mutants strains were validated by Southern Blot. The probes have been marked in the Figure.

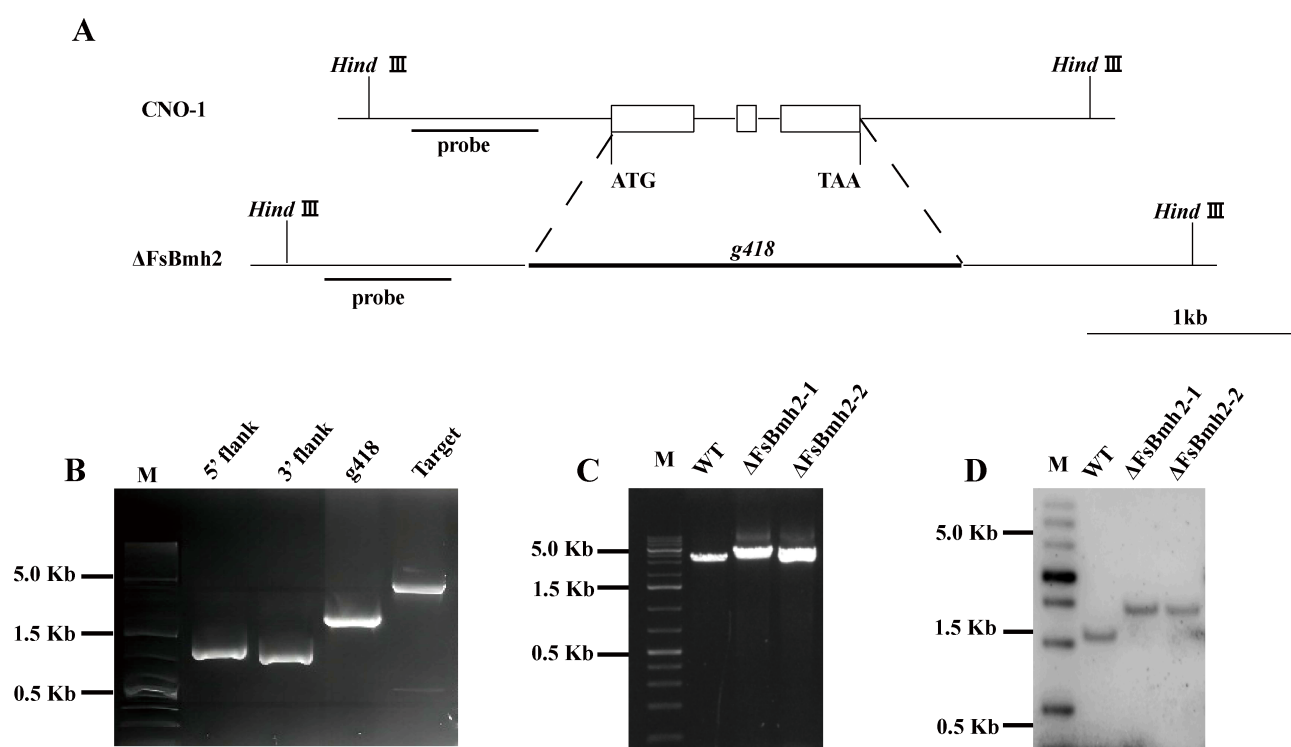

**Figure S3.** Generation of *FsBmh2* deletion mutants strains. (A,B) *FsBmh2* gene locus and gene replacement construct. (C) *FsBmh2* deletion mutants were validated by PCR with *FsBmh2*-A/B. (D) *FsBmh2* deletion mutants strains were validated by Southern Blot. The probes have been marked in the Figure.
