# Supplementary material for: Redundant and Distinct Roles of Two 14-3-3 Proteins in Fusarium sacchari, Pathogen of Sugarcane Pokkah Boeng Disease
Source: MDPI journal article supplement (doi:10.3390/jof10040257), 2024-03-28
Supplement: s1 [file s1]

**Table S4. Effect of *FsBmh* mutation or overexpression on the cell length of the hyphae\***

| Strain          | Distance between two septa (μm) |
|-----------------|---------------------------------|
| WT              | 20.0 ± 3.86 <sup>a</sup>        |
| ΔFsBmh1         | 19.9 ± 0.86 <sup>a</sup>        |
| O-FsBmh1        | 24.5 ± 2.12 <sup>a</sup>        |
| ΔFsBmh1/sFsBmh2 | 12.6 ± 1.08 <sup>b</sup>        |
| C-ΔFsBmh1       | 20.8 ± 3.34 <sup>a</sup>        |
| ΔFsBmh2         | 11.9 ± 1.13 <sup>b</sup>        |
| O-FsBmh2        | 22.1 ± 0.24 <sup>a</sup>        |
| ΔFsBmh2/sFsBmh1 | 9.9 ± 1.03 <sup>b</sup>         |
| C-ΔFsBmh2       | 22.1 ± 2.31 <sup>a</sup>        |

\*The wild-type or mutants were grown in PDB for 8 hours. The third cell from the tip of a hypha was measured. Three groups each with 30 hyphae, were determined for cell length between a pair of septa.
