# Supplementary material for: Redundant and Distinct Roles of Two 14-3-3 Proteins in Fusarium sacchari, Pathogen of Sugarcane Pokkah Boeng Disease
Source: MDPI journal article supplement (doi:10.3390/jof10040257), 2024-03-28
Supplement: s1 [file s1]

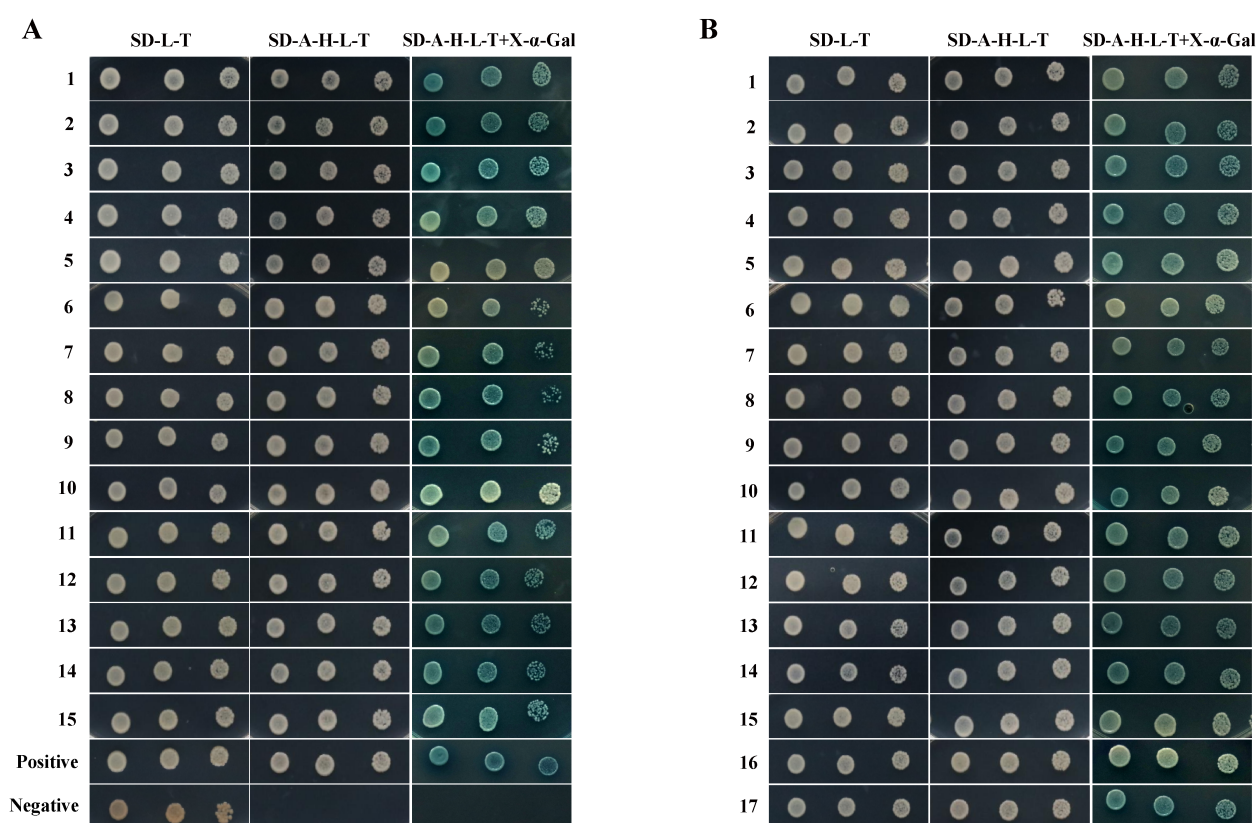

**Figure S8.** The interaction relationship between 14-3-3 proteins and their targets. (A) Yeast two hybrid assay for the interaction relationship of FsBmh1. (B) Yeast two hybrid assay for the interaction relationship of FsBmh2.
