# Supplementary material for: Redundant and Distinct Roles of Two 14-3-3 Proteins in Fusarium sacchari, Pathogen of Sugarcane Pokkah Boeng Disease
Source: MDPI journal article supplement (doi:10.3390/jof10040257), 2024-03-28
Supplement: s1 [file s1]

**Table S6. Effect of *FsBmh* mutation or overexpression on the spores grown on carnation leaf agar.**

| Strain                           | Spore length (μm)         |                           |                            |                           | Spore width (μm)         |                           |                           |                           |
|----------------------------------|---------------------------|---------------------------|----------------------------|---------------------------|--------------------------|---------------------------|---------------------------|---------------------------|
|                                  | Microspore (mini)         | Microspore (normal)       | Macrospore (2 cells)       | Macrospore (3-4 cells)    | Microspore (mini)        | Microspore (normal)       | Macrospore (2 cells)      | Macrospore (3-4 cells)    |
| WT                               | 8.32 ± 1.52 <sup>a</sup>  | 14.96 ± 2.29 <sup>a</sup> | 22.10 ± 1.69 <sup>ab</sup> | 26.90 ± 2.96 <sup>b</sup> | 1.68 ± 0.45 <sup>a</sup> | 1.98 ± 0.43 <sup>ab</sup> | 2.22 ± 0.41 <sup>ab</sup> | 2.46 ± 0.51 <sup>ab</sup> |
| Δ <i>FsBmh1</i>                  | 8.33 ± 1.23 <sup>a</sup>  | 14.64 ± 2.96 <sup>a</sup> | 24.55 ± 3.54 <sup>ab</sup> | 34.91 ± 3.11 <sup>a</sup> | 1.70 ± 0.41 <sup>a</sup> | 1.81 ± 0.25 <sup>b</sup>  | 1.94 ± 0.30 <sup>b</sup>  | 2.10 ± 0.25 <sup>b</sup>  |
| Δ <i>FsBmh1</i> /s <i>FsBmh2</i> | 8.21 ± 1.93 <sup>a</sup>  | 14.12 ± 2.68 <sup>a</sup> | 25.06 ± 3.08 <sup>a</sup>  | 32.44 ± 2.87 <sup>a</sup> | 1.74 ± 0.45 <sup>a</sup> | 1.94 ± 0.18 <sup>ab</sup> | 2.27 ± 0.46 <sup>ab</sup> | 2.36 ± 0.53 <sup>ab</sup> |
| O- <i>FsBmh1</i>                 | 8.58 ± 1.24 <sup>a</sup>  | 14.83 ± 1.80 <sup>a</sup> | 22.75 ± 1.65 <sup>ab</sup> | 25.17 ± 1.83 <sup>b</sup> | 1.85 ± 0.31 <sup>a</sup> | 1.96 ± 0.14 <sup>ab</sup> | 2.29 ± 0.45 <sup>ab</sup> | 2.44 ± 0.48 <sup>ab</sup> |
| C-Δ <i>FsBmh1</i>                | 8.41 ± 2.90 <sup>a</sup>  | 15.25 ± 2.99 <sup>a</sup> | 22.83 ± 3.04 <sup>ab</sup> | 25.17 ± 2.23 <sup>b</sup> | 1.75 ± 0.45 <sup>a</sup> | 2.08 ± 0.29 <sup>ab</sup> | 2.20 ± 0.45 <sup>ab</sup> | 2.42 ± 0.51 <sup>ab</sup> |
| Δ <i>FsBmh2</i>                  | 6.89 ± 1.71 <sup>ab</sup> | 13.61 ± 2.67 <sup>a</sup> | 21.60 ± 2.19 <sup>b</sup>  | 25.06 ± 1.67 <sup>b</sup> | 1.94 ± 0.24 <sup>a</sup> | 2.33 ± 0.49 <sup>ab</sup> | 2.60 ± 0.55 <sup>a</sup>  | 2.77 ± 0.42 <sup>a</sup>  |
| Δ <i>FsBmh2</i> /s <i>FsBmh1</i> | 6.10 ± 1.19 <sup>b</sup>  | 13.44 ± 2.00 <sup>a</sup> | 21.87 ± 2.42 <sup>b</sup>  | 24.75 ± 1.28 <sup>b</sup> | 1.85 ± 0.34 <sup>a</sup> | 2.11 ± 0.33 <sup>ab</sup> | 2.31 ± 0.46 <sup>ab</sup> | 2.50 ± 0.53 <sup>ab</sup> |
| O- <i>FsBmh2</i>                 | 8.73 ± 2.24 <sup>a</sup>  | 15.18 ± 1.78 <sup>a</sup> | 22.73 ± 1.73 <sup>ab</sup> | 25.36 ± 2.42 <sup>b</sup> | 1.75 ± 0.40 <sup>a</sup> | 2.09 ± 0.30 <sup>ab</sup> | 2.23 ± 0.41 <sup>ab</sup> | 2.42 ± 0.43 <sup>ab</sup> |
| C-Δ <i>FsBmh2</i>                | 8.54 ± 3.07 <sup>a</sup>  | 15.09 ± 1.87 <sup>a</sup> | 22.54 ± 2.16 <sup>ab</sup> | 25.18 ± 2.44 <sup>b</sup> | 1.81 ± 0.34 <sup>a</sup> | 2.04 ± 0.35 <sup>ab</sup> | 2.25 ± 0.43 <sup>ab</sup> | 2.42 ± 0.48 <sup>ab</sup> |
