# Supplementary material for: Redundant and Distinct Roles of Two 14-3-3 Proteins in Fusarium sacchari, Pathogen of Sugarcane Pokkah Boeng Disease
Source: MDPI journal article supplement (doi:10.3390/jof10040257), 2024-03-28
Supplement: s1 [file s1]

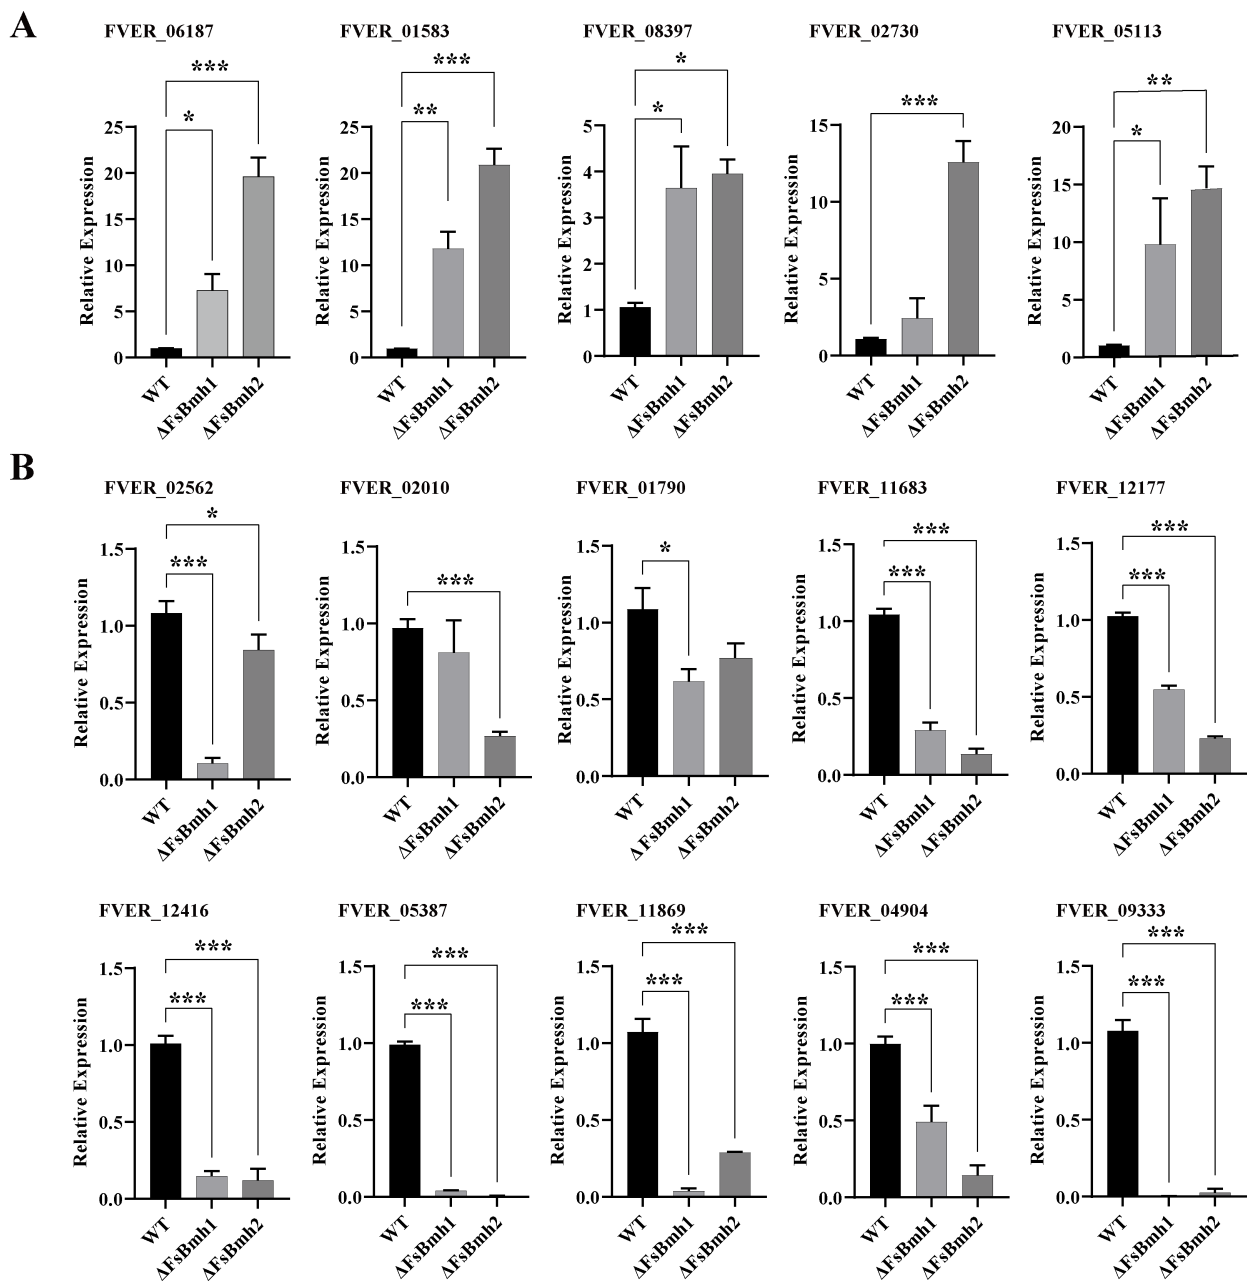

**Figure S7.** Validation of DEGs in  $\Delta$ FsBmh1 and  $\Delta$ FsBmh2. (A) Up-regulated genes in  $\Delta$ FsBmh1 and  $\Delta$ FsBmh2 versus WT. (B) Down-regulated genes in  $\Delta$ FsBmh1 and  $\Delta$ FsBmh2 versus WT. P-value were calculated based on Student's T-test of replicate  $2^{-\Delta\Delta CT}$  values between a sample and WT. \* $P < 0.05$ , \*\* $P < 0.01$ , \*\*\* $P < 0.001$ .
