# Supplementary material for: Redundant and Distinct Roles of Two 14-3-3 Proteins in Fusarium sacchari, Pathogen of Sugarcane Pokkah Boeng Disease
Source: MDPI journal article supplement (doi:10.3390/jof10040257), 2024-03-28
Supplement: s1 [file s1]

**Table S3. Grading scheme for Pokkah boeng disease of sugarcane**

| <b>Incidence levels</b> | <b>Symptom description</b>                                                                                                                                                                                                                                                                                                                                                                                                   |
|-------------------------|------------------------------------------------------------------------------------------------------------------------------------------------------------------------------------------------------------------------------------------------------------------------------------------------------------------------------------------------------------------------------------------------------------------------------|
| 0                       | No symptom                                                                                                                                                                                                                                                                                                                                                                                                                   |
| 1                       | Chlorotic or greensick symptom at the base of young leaves; slight wrinkling; very few irregular reddish specks or stripes                                                                                                                                                                                                                                                                                                   |
| 2                       | The affected leaves are narrower or shorter than the normal leaves; distinct distortion (wrinkling and twisting) and the reddish areas sometimes develop into lens-shaped holes which have no definite arrangement, or reddish tissue may form ladder-like lesions often with dark edges                                                                                                                                     |
| 3                       | The leaves are affected in severe cases; leaf sheaths become chlorotic and develop irregular necrotic areas of reddish color; the infection in the spindle continues downward into the stalk and dark reddish streaks may be found extending through several internodes; or the infection may form long lesions with cross depressions that give them a ladder-like appearance                                               |
| 4                       | These lesions sometimes break through the surface of the rind causing curvature and distortion of the stalk. Exaggerated versions of these depressions may look like neatly made “knife-cuts” in the stalk. In the stem, the fungus causes a dark-brown discoloration of the infected tissues. The ladder-like lesions are due to rupturing of the diseased cells which cannot keep up with the growth of the healthy tissue |
| 5                       | Entire top of the plant dies (referred to as “top rot”)                                                                                                                                                                                                                                                                                                                                                                      |
