# Supplementary material for: Redundant and Distinct Roles of Two 14-3-3 Proteins in Fusarium sacchari, Pathogen of Sugarcane Pokkah Boeng Disease
Source: MDPI journal article supplement (doi:10.3390/jof10040257), 2024-03-28
Supplement: s1 [file s1]

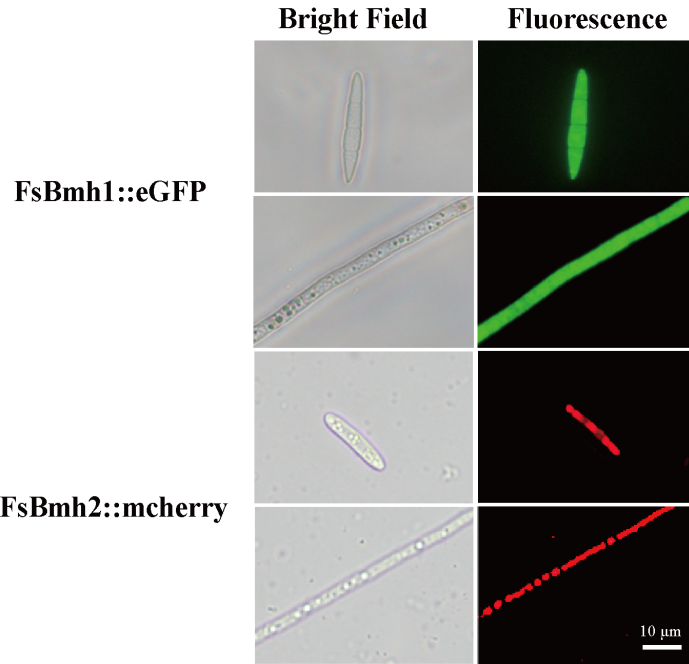

**Figure S9.** Cellular localization of 14-3-3 proteins in *F. sacchari*.

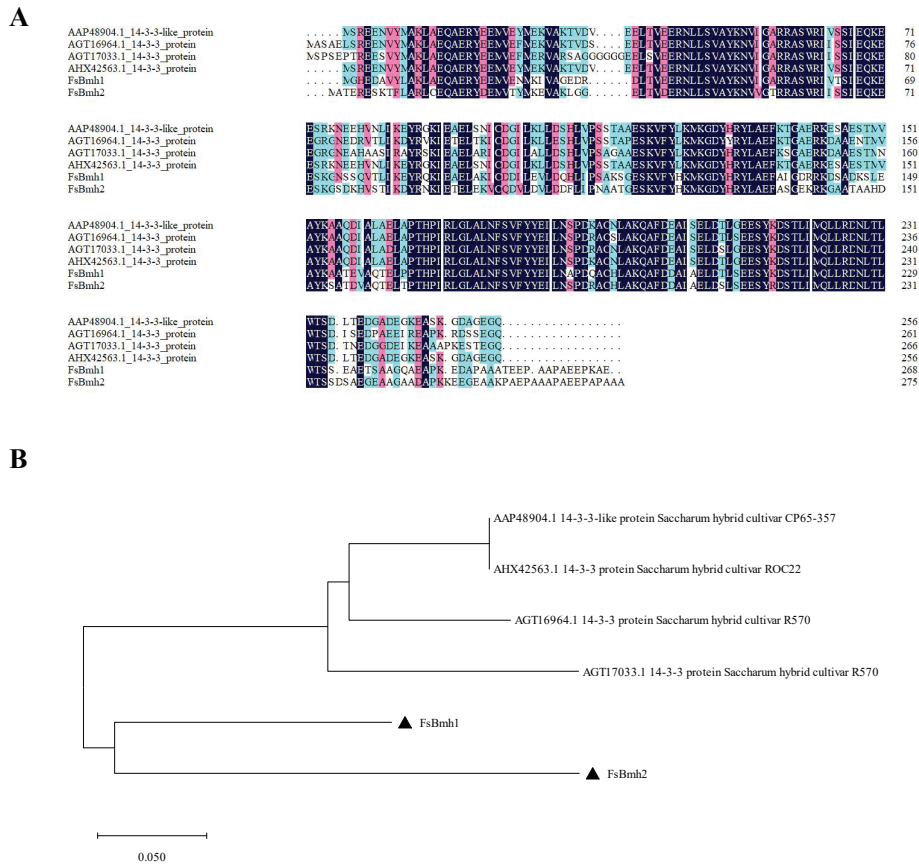

**Figure S10.** Sequence alignments and analysis of the phylogenetic relationships between *F. sacchari* FsBmh1 and Sugarcane 14-3-3 proteins.
