# Supplementary material for: Redundant and Distinct Roles of Two 14-3-3 Proteins in Fusarium sacchari, Pathogen of Sugarcane Pokkah Boeng Disease
Source: MDPI journal article supplement (doi:10.3390/jof10040257), 2024-03-28
Supplement: s1 [file s1]

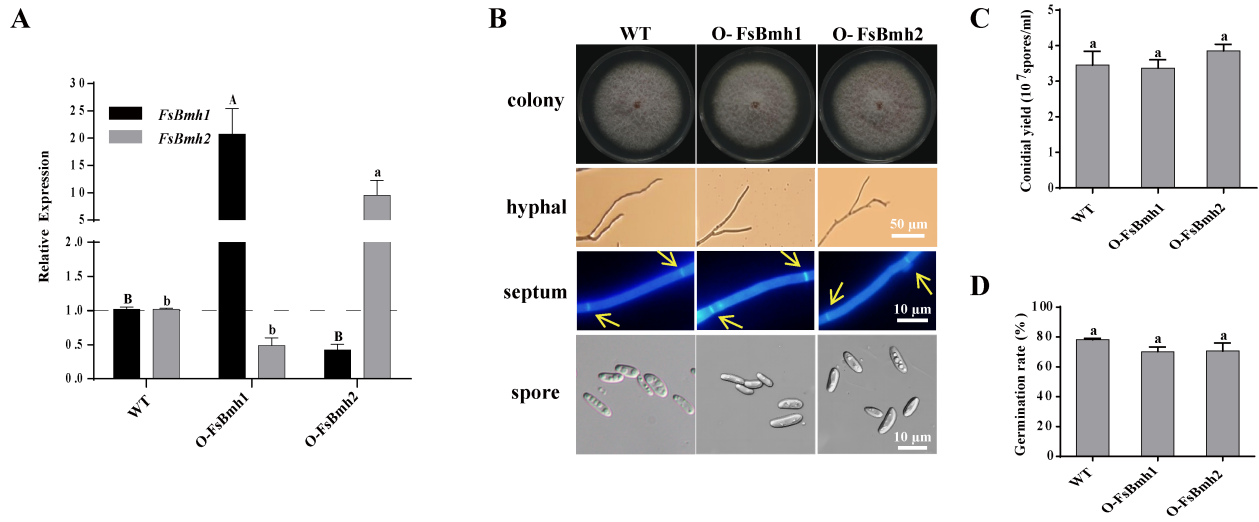

**Figure S6.** *FsBmh*- expression and phenotypes of *FsBmh*- overexpression mutants. (A) Relative expression of *FsBmh*- genes in *FsBmh*-overexpression mutants were determined by qRT-PCR. (B) Hyphal and conidial morphology. Colony were photographed on PDA plates at day 7 after inoculation. Hyphae of 3 day old were photographed microscopely. To visualize septa, hyphae were stained with CFW. The separations were marked by yellow arrows. Spore characteristics were photographed by microscope, scale bar = 10  $\mu$ m. (C) Statistics of conidial yield of strains. Conidia were harvested from colonies of 7-day-old PDA plates (D) Conidial germination rate in PDB at 28°C with rotation of 150 rpm for 6 h. Different letters indicate significant differences at  $P < 0.05$ .
