# Supplementary material for: Redundant and Distinct Roles of Two 14-3-3 Proteins in Fusarium sacchari, Pathogen of Sugarcane Pokkah Boeng Disease
Source: MDPI journal article supplement (doi:10.3390/jof10040257), 2024-03-28
Supplement: s1 [file s1]

A

|          |                                                                                                        |
|----------|--------------------------------------------------------------------------------------------------------|
| Bb_Bmh1  | ...DDAVYLAKLAEQAERYDEMVENMKIVASEDRDLVDEERNLLSVAYNVIGARRASWRIVTSIEQKEESKNS.SQVTLKREYRKIEPELAKICEIL      |
| Bb_Bmh2  | TTTERESKTHLARTCEQAERYDEMVTYMKFVAKIGGLIVDERNLLSVAYNVIGARRASWRIVTSIEQKEESKNS.KHVPTTHDYRKIEPELAKICEIL     |
| Ff_Bmh2  | ATERESKTHLARTCEQAERYDEMVTYMKFVAKIGGLIVDERNLLSVAYNVIGARRASWRIVTSIEQKEESKNS.KHVSTTHDYRKIEPELAKICEIL      |
| *Fs_Bmh2 | ATERESKTHLARTCEQAERYDEMVTYMKFVAKIGGLIVDERNLLSVAYNVIGARRASWRIVTSIEQKEESKNS.KHVSTTHDYRKIEPELAKICEIL      |
| Fg_Bmh2  | ATERESKTHLARTCEQAERYDEMVTYMKFVAKIGGLIVDERNLLSVAYNVIGARRASWRIVTSIEQKEESKNS.KHVSTTHDYRKIEPELAKICEIL      |
| Fo_Bmh2  | ...FLARTCEQAERYDEMVTYMKFVAKIGGLIVDERNLLSVAYNVIGARRASWRIVTSIEQKEESKNS.KHVSTTHDYRKIEPELAKICEIL           |
| Sc_Bmh1  | STSRSDSVYLAKLAEQAERYDEMVENMKIVASSGQDISVEERNLLSVAYNVIGARRASWRIVTSIEQKEESKNS.KHVSTTHDYRKIEPELAKICEIL     |
| Sc_Bmh2  | SQTRSDSVYLAKLAEQAERYDEMVENMKIVASSGQDISVEERNLLSVAYNVIGARRASWRIVTSIEQKEESKNS.KHVSTTHDYRKIEPELAKICEIL     |
| Fg_Bmh1  | ...EDAVYLAKLAEQAERYDEMVENMKIVASEDRDLVDEERNLLSVAYNVIGARRASWRIVTSIEQKEESKNS.SQVTLKREYRKIEPELAKICEIL      |
| Ff_Bmh1  | ...EDAVYLAKLAEQAERYDEMVENMKIVASEDRDLVDEERNLLSVAYNVIGARRASWRIVTSIEQKEESKNS.SQVTLKREYRKIEPELAKICEIL      |
| Fo_Bmh1  | ...EDAVYLAKLAEQAERYDEMVENMKIVASEDRDLVDEERNLLSVAYNVIGARRASWRIVTSIEQKEESKNS.SQVTLKREYRKIEPELAKICEIL      |
| *Fs_Bmh1 | ...EDAVYLAKLAEQAERYDEMVENMKIVASEDRDLVDEERNLLSVAYNVIGARRASWRIVTSIEQKEESKNS.SQVTLKREYRKIEPELAKICEIL      |
| Bb_Bmh1  | IVLLESLIENSAITGESKVFYKMKGDYHRYLAEEFASGERRKGAATAADAYKSAITDVAQTELEFTHPIRLGLALNFSVFYYETINSPDRACHLAKQADDAI |
| Bb_Bmh2  | IVLLESLIENSAITGESKVFYKMKGDYHRYLAEEFASGERRKGAATAADAYKSAITDVAQTELEFTHPIRLGLALNFSVFYYETINSPDRACHLAKQADDAI |
| Ff_Bmh2  | IVLLESLIENSAITGESKVFYKMKGDYHRYLAEEFASGERRKGAATAADAYKSAITDVAQTELEFTHPIRLGLALNFSVFYYETINSPDRACHLAKQADDAI |
| *Fs_Bmh2 | IVLLESLIENSAITGESKVFYKMKGDYHRYLAEEFASGERRKGAATAADAYKSAITDVAQTELEFTHPIRLGLALNFSVFYYETINSPDRACHLAKQADDAI |
| Fg_Bmh2  | IVLLESLIENSAITGESKVFYKMKGDYHRYLAEEFASGERRKGAATAADAYKSAITDVAQTELEFTHPIRLGLALNFSVFYYETINSPDRACHLAKQADDAI |
| Fo_Bmh2  | IVLLESLIENSAITGESKVFYKMKGDYHRYLAEEFASGERRKGAATAADAYKSAITDVAQTELEFTHPIRLGLALNFSVFYYETINSPDRACHLAKQADDAI |
| Sc_Bmh1  | SVLLESLIENSAITGESKVFYKMKGDYHRYLAEEFASGERRKGAATAADAYKSAITDVAQTELEFTHPIRLGLALNFSVFYYETINSPDRACHLAKQADDAI |
| Sc_Bmh2  | SVLLESLIENSAITGESKVFYKMKGDYHRYLAEEFASGERRKGAATAADAYKSAITDVAQTELEFTHPIRLGLALNFSVFYYETINSPDRACHLAKQADDAI |
| Fg_Bmh1  | IVLLESLIENSAITGESKVFYKMKGDYHRYLAEEFASGERRKGAATAADAYKSAITDVAQTELEFTHPIRLGLALNFSVFYYETINSPDRACHLAKQADDAI |
| Ff_Bmh1  | IVLLESLIENSAITGESKVFYKMKGDYHRYLAEEFASGERRKGAATAADAYKSAITDVAQTELEFTHPIRLGLALNFSVFYYETINSPDRACHLAKQADDAI |
| Fo_Bmh1  | IVLLESLIENSAITGESKVFYKMKGDYHRYLAEEFASGERRKGAATAADAYKSAITDVAQTELEFTHPIRLGLALNFSVFYYETINSPDRACHLAKQADDAI |
| *Fs_Bmh1 | IVLLESLIENSAITGESKVFYKMKGDYHRYLAEEFASGERRKGAATAADAYKSAITDVAQTELEFTHPIRLGLALNFSVFYYETINSPDRACHLAKQADDAI |
| Bb_Bmh1  | AGKPSAMTSAQIVHPTDVLTELDLSEESYKSDSTLIMQLLRDNLWTWSSAEATAPAAEGASKEEFVAAEEFPKAEKPAA.....                   |
| Bb_Bmh2  | A.....ELDSLSEESYKSDSTLIMQLLRDNLWTWSSDTAAEAPS..ADAPKKD.....                                             |
| Ff_Bmh2  | A.....ELDSLSEESYKSDSTLIMQLLRDNLWTWSSDSAEGEAAGAADAPKKEE.....                                            |
| *Fs_Bmh2 | A.....ELDSLSEESYKSDSTLIMQLLRDNLWTWSSDSAEGEAAGAADAPKKEE.....                                            |
| Fg_Bmh2  | A.....ELDSLSEESYKSDSTLIMQLLRDNLWTWSSDS.....                                                            |
| Fo_Bmh2  | A.....ELDSLSEESYKSDSTLIMQLLRDNLWTWSSDS.....                                                            |
| Sc_Bmh1  | A.....ELDSLSEESYKSDSTLIMQLLRDNLWTWSSDSAEGEAAGAADAPKKEE.....                                            |
| Sc_Bmh2  | A.....ELDSLSEESYKSDSTLIMQLLRDNLWTWSSDSAEGEAAGAADAPKKEE.....                                            |
| Fg_Bmh1  | A.....ELDSLSEESYKSDSTLIMQLLRDNLWTWSSAEATSAAGQAEAPK.....                                                |
| Ff_Bmh1  | A.....ELDSLSEESYKSDSTLIMQLLRDNLWTWSSAEATSAAGQAEAPKED.....                                              |
| Fo_Bmh1  | A.....ELDSLSEESYKSDSTLIMQLLRDNLWTWSSAEATSAAGQAEAPKED.....                                              |
| *Fs_Bmh1 | A.....ELDSLSEESYKSDSTLIMQLLRDNLWTWSSAEATSAAGQAEAPKED.....                                              |

B

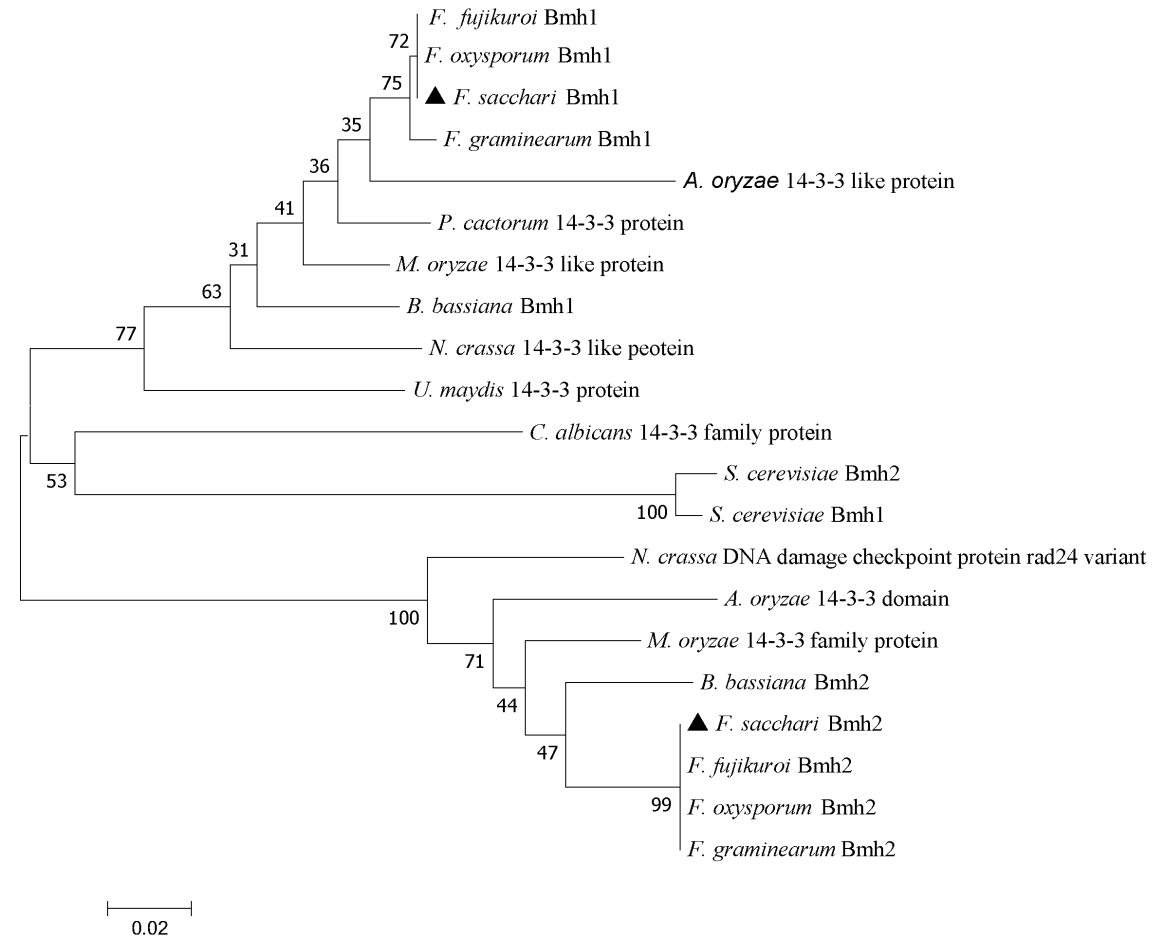

**Figure S1.** Sequence alignments and analysis of the phylogenetic relationships among 14-3-3 and its homologs. (A) sequence alignment of 14-3-3 and its homologs. (B) A neighbor-joining tree was constructed using the amino acid sequence of 14-3-3 proteins from different organisms.
