# Supplementary material for: Redundant and Distinct Roles of Two 14-3-3 Proteins in Fusarium sacchari, Pathogen of Sugarcane Pokkah Boeng Disease
Source: MDPI journal article supplement (doi:10.3390/jof10040257), 2024-03-28
Supplement: s1 [file s1]

**Table S12. Primer pares used in Y2H.**

| No. | Gene ID    | Primer sequence (forward/reverse, 5'-3')                                                     |
|-----|------------|----------------------------------------------------------------------------------------------|
| 1   | FVER_00270 | GACGTACCAGATTACGCTCATATATGACTCAAGTGCCCGA/TCGATGCCACCCGGGTGGAATTTCAAACAATACCAAGTA             |
| 2   | FVER_01513 | GACGTACCAGATTACGCTCATATATGGCAGCGAACAAGGC/TCGATGCCACCCGGGTGGAATTCTAATCCAACATAGCTT             |
| 3   | FVER_02281 | GACGTACCAGATTACGCTCATATATGGCCCCCGCCGCTGG/TCGATGCCACCCGGGTGGAATTTTAGTCAGAACCACCGACGGC         |
| 4   | FVER_02466 | GACGTACCAGATTACGCTCATATATGTCTCAACATGCTGG/TCGATGCCACCCGGGTGGAATTTTACGCGTTCTTCTTTC             |
| 5   | FVER_03743 | GACGTACCAGATTACGCTCATATATGGCTCCCATCAAGGTCG/TCGATGCCACCCGGGTGGAATTTTACTTGAGGCATCGACCTTGGC     |
| 6   | FVER_04097 | GACGTACCAGATTACGCTCATATATGGGTAAGGAGGACAAG/TCGATGCCACCCGGGTGGAATTTTATTTCTTGCGGCGCT            |
| 7   | FVER_04309 | GACGTACCAGATTACGCTCATATATGAGTCTCGTACAACATTC/TCGATGCCACCCGGGTGGAATTCTAGCAAATGGCATGTG          |
| 8   | FVER_04904 | GACGTACCAGATTACGCTCATATAGGAAGTATTCTGCTGTG/TCGATGCCACCCGGGTGGAATTGTTAGAAATGAAACAGA            |
| 9   | FVER_06138 | GACGTACCAGATTACGCTCATATATGAGGCGCCCTCTTCC/TCGATGCCACCCGGGTGGAATTTTAGTGGTGGAACAGACGAATG        |
| 10  | FVER_06338 | GACGTACCAGATTACGCTCATATATGTTGTCACGAGCCGC/TCGATGCCACCCGGGTGGAATTTTACATGTCCGCAGAGG             |
| 11  | FVER_07898 | GACGTACCAGATTACGCTCATATATGCCCCGGTGCTGTGTCGATGAGAA/TCGATGCCACCCGGGTGGAATTTGGCTGCGAATTGGCTTCCT |
| 12  | FVER_12178 | GACGTACCAGATTACGCTCATATATGAAGACTCCCGCACGA/TCGATGCCACCCGGGTGGAATTTTAGTGGCGGAGGCTGC            |
| 13  | FVER_09248 | GACGTACCAGATTACGCTCATATATGCATTCCGTTAAGGTCCTCTCAG/TCGATGCCACCCGGGTGGAATTTTAAAAGAGCTGGGCAACGGC |
| 14  | FVER_10685 | GACGTACCAGATTACGCTCATATATGTCTACCGTGGGCAAGACC/TCGATGCCACCCGGGTGGAATTCATATCGACGACGGCACGG       |
| 15  | FVER_13904 | GACGTACCAGATTACGCTCATATATGAGCAGCACCAACCTCCAAAAG/TCGATGCCACCCGGGTGGAATTTTAGTGCTTCTTGGCATTGTTC |
| 16  | FVER_02283 | GACGTACCAGATTACGCTCATATATGGCTCCTGCCGTCGGT/TCGATGCCACCCGGGTGGAATTCACCAGCTCCGTAGAACTTCA        |
| 17  | FVER_05845 | GACGTACCAGATTACGCTCATATATGCCTTACGTATCTGCTGC/TCGATGCCACCCGGGTGGAATTTTATAGCTTTGATTGCAAGTTGTC   |
| 18  | FVER_08037 | GACGTACCAGATTACGCTCATATATGCCGTCGCACAACGAAG/TCGATGCCACCCGGGTGGAATTTTAATTGCCCTTTTCGGTACCAATAC  |
| 19  | FVER_11800 | GACGTACCAGATTACGCTCATATATGGCGGGGGATCATAACG/TCGATGCCACCCGGGTGGAATTTTAACCTTCTTTCCCATCATCCTC    |
| 20  | FVER_11869 | GACGTACCAGATTACGCTCATATATGGCAACCTCCAGTGA/TCGATGCCACCCGGGTGGAATTTTACCGCTCATCATTGG             |
