# Supplementary material for: Redundant and Distinct Roles of Two 14-3-3 Proteins in Fusarium sacchari, Pathogen of Sugarcane Pokkah Boeng Disease
Source: MDPI journal article supplement (doi:10.3390/jof10040257), 2024-03-28
Supplement: s1 [file s1]

**Table S2. Primer pares used in qRT-PCR for assessing transcript levels of DEGs.**

| Gene ID    | Anotation                                    | Sequence (forward/reverse, 5'-3')                   |
|------------|----------------------------------------------|-----------------------------------------------------|
| FVER_02495 | 18S ribosomal RNA                            | TGGTTTCTAGGACCGCCGTA/CCTTGGCAAATGCTTTCGC            |
| FVER_02010 | Cell division control protein CDC3           | TTGTTGGTGAGTCTGGCTTAGGCA/GAATAATGTCGAGGCTGGGTCCC    |
| FVER_02562 | Growth-Arrest-Specific Protein               | ATGACCGATCTCAACGCCCAAG/CGACAGTAGCAGGACCGAGATTCA     |
| FVER_01790 | Peroxisome assembly protein                  | CTTCGGGGCACCTTTGACGA/TGGTAAGTAGGTAGCGGAGGGTTCG      |
| FVER_11683 | Outer spore wall protein RRT8                | TCTTTAAGGAGGACTATGCCCAGGC/CAAAGTGAGCGATGGGAGATGAAGT |
| FVER_12177 | Phosphatidylserine synthase                  | CCTCCAACAGCCCAGCAATTG/GAGAGTAATCAAGTCGGCAAGGTGC     |
| FVER_12416 | Egh16-like virulence factor                  | TGGCCTTGGGAGCTGAGCAT/CTCCAGTGGAGTTTGAATGCCG         |
| FVER_05387 | Integral membrane protein PTH11              | CCGCCTATGCGACGTTCAAGA/GCAGACTCCAAAGATGAGAACCCAG     |
| FVER_11869 | Trehalose-6-phosphate phosphatase            | AGGCGGTGATTGGGACTTGAAA/GGTGTGATTCCATGGGGTAGCG       |
| FVER_04904 | Trehalase                                    | TTCCGGTCTACATCAAC/CACCGCTATAAACCTCACCAGATGG         |
| FVER_09333 | G protein-coupled receptor catalytic subunit | GGTCGTGATGCCTACTA/GGGCGGAGAATGGGTATGCAT             |
| FVER_07211 | 14-3-3 family protein Bmh1                   | CGTTCTTGTAGGCGACGGAGAG/TGAGCGATATGAGGAGATGGTTGAG    |
| FVER_01000 | 14-3-3 family protein Bmh2                   | TCTCGCTCTCAACTTCTCCGTCTT/AAGTCCAGAGGGTGAGGTTGTCTC   |
| FVER_06187 | Heat shock protein SSB1                      | TTCACTCTTGCCCTATCCCTCC/CAGAGTTGGAGATAGTGATGTTGGCG   |
| FVER_08397 | DNA repair protein RAD50                     | GGGCGGCGCTTTCATTCAT/GCGGGTGGTCTTCTTGACGGTA          |
| FVER_01583 | Cell division control protein 45             | CAGAAAATACGAGAGGATAAGCGCG/GCGTCAGAGTCTGAGCTATCGGAGT |
| FVER_02730 | Double-strand break repair protein MRE11     | CCTGCACCTGCCAAGAAACCA/GTCTTCGAATGCCTTGCGGC          |
| FVER_05113 | Type 2A phosphatase activator TIP41          | ACAACGACACACACGCAAAGCAG/GGAATGCCAATCTTTTCGGTGAGT    |
