# Supplementary material for: Redundant and Distinct Roles of Two 14-3-3 Proteins in Fusarium sacchari, Pathogen of Sugarcane Pokkah Boeng Disease
Source: MDPI journal article supplement (doi:10.3390/jof10040257), 2024-03-28
Supplement: s1 [file s1]

**Table S1. Primer pares used for the manipulation of *FsBmh1* and *FsBmh2* in *F. sacchari* and the identification of their mutants.**

| Primers       | Sequence(5'-3')                                                                        | Purpose                                 |
|---------------|----------------------------------------------------------------------------------------|-----------------------------------------|
| FsBmh1-A/B    | GTGAAGAGCGATTGTCCATTGTTGG/CACAGGTCACAGTCACCTCATC                                       | <i>FsBmh1</i> full-length clone         |
| FsBmh2-A/B    | CACAAGCTCCGCAGTAGGTATCTG/CCAGGTTACTCAATCGTCGCAC                                        | <i>FsBmh2</i> full-length clone         |
| FsBmh1-1F/R   | TGGTTGATGGCACTGGCAGT/TCTTTCTAGAGGATCCCCGGGTACCGCGACTGTGT<br>TTCAGGACAGT                | Cloning of <i>FsBmh1</i> 5'             |
| FsBmh2-1F/R   | ATGGCACTGTGCGTTGTCTTG/AGTACAATCTGCTCTGATGCCGATTCTTAGACGAG<br>CTGAAC                    | Cloning of <i>FsBmh2</i> 5'             |
| FsBmh1-2F/R   | ATATCATCTTCTGTGACCTGCAGGCTGATTTGTCTATGCAGGTGTC/TCCTCTGTCT<br>GCTTCACAGTC               | Cloning of <i>FsBmh1</i> 3'             |
| FsBmh2-2F/R   | CTTCAATATCATCTTCTGTGCTAGGAACCGAGACGTATTCT/CAGGTACGAGAGACT<br>ATCAC                     | Cloning of <i>FsBmh2</i> 3'             |
| Hph-F/R       | CGGTACCCGGGGATCCTCTAG/GCCTGCAGGTCGACAGAAGATG                                           | <i>Hph</i> full-length clone            |
| G418- F/R     | GGCATCAGAGCAGATTGTACT/CGACAGAAGATGATATTGAAG                                            | <i>G418</i> full-length clone           |
| Hph-F0/R0     | TGGGCTGATCTGACCAGTTGCC/CACCAGCCCTGGGTTCGCAAAG                                          | Detection of $\Delta$ FsBmh1            |
| G418- F0/R0   | GGTATGACCGGGTCGTTTAC/ATTCCGTCACCAGCCCTGGG                                              | Detection of $\Delta$ FsBmh2            |
| C-FsBmh1-F/R  | GAATTCTCTTAGACAACGATGTCAGCAAATC/AGCGTTAACTTCACAGGTCACAGT<br>CACCTCATC                  | Vector for C-FsBmh1                     |
| C-FsBmh2-F/R  | GTTAACAAGCTTGCGGCCGAGAGATTGGCGTCAACTGCC/TCATCTTCTGTGCGAC<br>GAATTCTTTGCCACACCTCCATCACC | Vector for C-FsBmh2                     |
| s-FsBmh1-1F/R | TTAGAGGTACGCGGCCGCATGGGTACGAAGACGCCGT/CTTGCTCACCATGCGG<br>CCGGGCAAGACCCAGGCGGATA       | <i>FsBmh1</i> -sense repeat             |
| s-FsBmh1-2F/R | AGGTCAGCATGCGTTAATCATGGGTACGAAGACGCCGT/GAGCGCACCATCTTCG<br>TTGGGCAAGACCCAGGCGGATA      | <i>FsBmh1</i> -antisense repeat         |
| s-FsBmh2-1F/R | TTAGAGGTACGCGGCCGCGCCAGGATGTTCTCGATGTC/CTTGCTCACCATGCGGC<br>CTTAGGAGGCAGCAGCAGGCG      | <i>FsBmh2</i> -sense repeat             |
| s-FsBmh2-2F/R | AGGTCAGCATGCGTTAACGCCAGGATGTTCTCGATGTC/GAGCGCACCATCTTCGT<br>TTTAGGAGGCAGCAGCAGGCG      | <i>FsBmh2</i> -antisense repeat         |
| O-FsBmh1-F/R  | TACTACTTTTAGAGGTACGCATGGGTACGAAGACGCCGT/AGATCAGGTCAGCAT<br>GCGTTTACTCGGCCTTAGGCTCCT    | Construction of plasmid for<br>O-FsBmh1 |
| O-FsBmh2-F/R  | TACTACTTTTAGAGGTACGCATGGTATCGCTGACATCGTA/AGATCAGGTCAGCATG<br>CGTTTTAGGAGGCAGCAGCAGGC   | Construction of plasmid for<br>O-FsBmh2 |
