# Supplementary material for: Redundant and Distinct Roles of Two 14-3-3 Proteins in Fusarium sacchari, Pathogen of Sugarcane Pokkah Boeng Disease
Source: MDPI journal article supplement (doi:10.3390/jof10040257), 2024-03-28
Supplement: s1 [file s1]

A

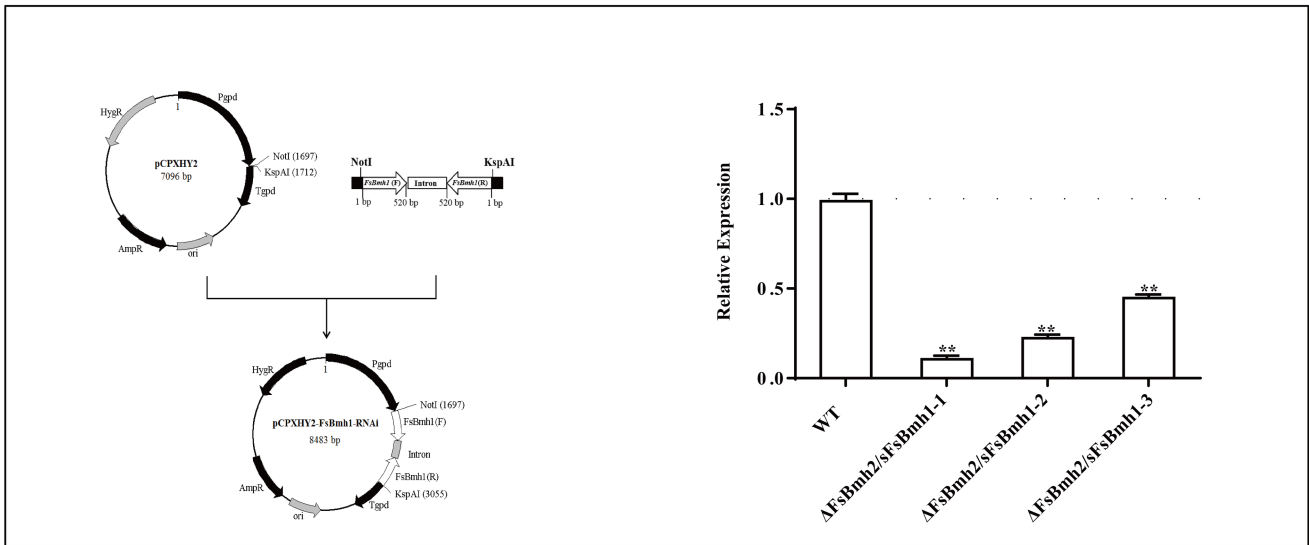

B

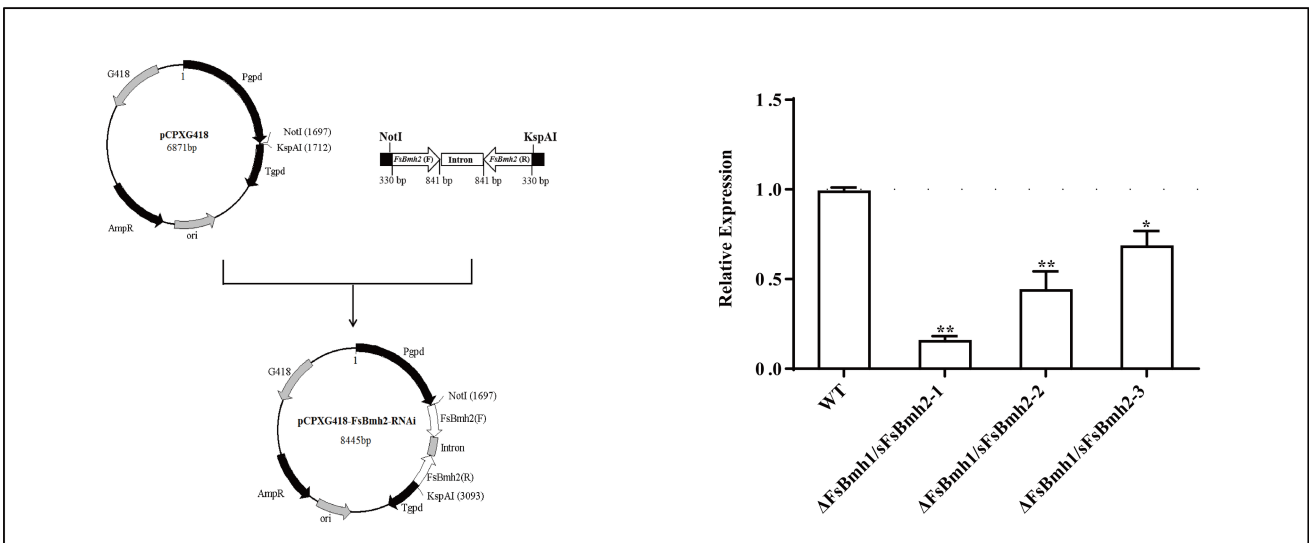

**Figure S4.** Generation of *FsBmh*-deletion/silenced mutants. (A,B) Silenced *FsBmh1* in  $\Delta$ *FsBmh2* and silenced *FsBmh2* in  $\Delta$ *FsBmh1*. *FsBmh*- RNA interference vector was generated by insertion of the *FsBmh*-RNAi cassette using in-fusion strategy (see Materials and Methods). The mean and standard deviation were derived from three independent biological replicates, each of which contained three technical repeats. The expression of *FsBmh*- transcripts was measured by quantitative real-time RT-PCR(2<sup>-ΔΔCT</sup> method). P-value were calculated based on Student's T-test of replicate 2<sup>-ΔΔCT</sup> values between a sample and WT. \**P* <0.05, \*\**P* <0.01, \*\*\**P* <0.001.
