# Supplementary material for: Redundant and Distinct Roles of Two 14-3-3 Proteins in Fusarium sacchari, Pathogen of Sugarcane Pokkah Boeng Disease
Source: J Fungi (Basel). 2024 Mar 28;10(4):257. doi: 10.3390/jof10040257 (PMC11051555; doi:10.3390/jof10040257)
Supplement: Supplementary file 1 [file jof-10-00257-s001.zip]

Archive with 20 entries (20 files):
- Figure S1.pdf
- Figure S4.pdf
- Figure S5.pdf
- Figure S6.pdf
- Figure S7.pdf
- Figure S8.pdf
- Figures S2-S3.pdf
- Figures S9-S10.pdf
- Table S1.pdf
- Table S10.KEGG enrichment analysis of up-regulated DEGs between añFsBmh2 and WT.xlsx
- Table S11. List and annotation of DEGs in five representation clusters.xlsx
- Table S12.pdf
- Table S2.pdf
- Table S3.pdf
- Table S4.pdf
- Table S5.pdf
- Table S6.pdf
- Table S7. KEGG enrichment analysis of up-regulated DEGs between añFsBmh1 and WT.xlsx
- Table S8. KEGG enrichment analysis of down-regulated DEGs between añFsBmh1 and WT.xlsx
- Table S9. KEGG enrichment analysis of down-regulated DEGs between añFsBmh2 and WT.xlsx
