# Supplementary material for: Redundant and Distinct Roles of Two 14-3-3 Proteins in Fusarium sacchari, Pathogen of Sugarcane Pokkah Boeng Disease
Source: J Fungi (Basel). 2024 Mar 28;10(4):257. doi: 10.3390/jof10040257 (PMC11051555; doi:10.3390/jof10040257)
Supplement: Supplementary file 1 [file jof-10-00257-s001.zip › Table S7. KEGG enrichment analysis of up-regulated DEGs between añFsBmh1 and WT.xlsx]

## Sheet: Sheet1
Table S4. KEGG enrichment analysis of up-regulated DEGs between ΔFsBmh1 and WT
Num	Pathway id	Description	Database	Pvalue	Padjust	First Category	Second Category
45	map03008	Ribosome biogenesis in eukaryotes	KEGG PATHWAY	5.74e-13	5.96e-11	Genetic Information Processing	Translation
18	map03020	RNA polymerase	KEGG PATHWAY	1.93e-06	0.000100178	Genetic Information Processing	Transcription
40	map03013	RNA transport	KEGG PATHWAY	2.85e-05	0.00098775	Genetic Information Processing	Translation
22	map00970	Aminoacyl-tRNA biosynthesis	KEGG PATHWAY	0.000219156	0.00569806	Genetic Information Processing	Translation
21	map03018	RNA degradation	KEGG PATHWAY	0.00169998	0.0294663	Genetic Information Processing	Folding, sorting and degradation
16	map03030	DNA replication	KEGG PATHWAY	0.00162905	0.0338842	Genetic Information Processing	Replication and repair
13	map03430	Mismatch repair	KEGG PATHWAY	0.00249901	0.0371282	Genetic Information Processing	Replication and repair
21	map00280	Valine, leucine and isoleucine degradation	KEGG PATHWAY	0.00638174	0.0829626	Metabolism	Amino acid metabolism
6	map03450	Non-homologous end-joining	KEGG PATHWAY	0.0107169	0.12384	Genetic Information Processing	Replication and repair
17	map00250	Alanine, aspartate and glutamate metabolism	KEGG PATHWAY	0.0299255	0.311226	Metabolism	Amino acid metabolism
12	map00760	Nicotinate and nicotinamide metabolism	KEGG PATHWAY	0.044534	0.356272	Metabolism	Metabolism of cofactors and vitamins
13	map00640	Propanoate metabolism	KEGG PATHWAY	0.03945	0.372981	Metabolism	Carbohydrate metabolism
21	map00230	Purine metabolism	KEGG PATHWAY	0.0438789	0.380284	Metabolism	Nucleotide metabolism
9	map03440	Homologous recombination	KEGG PATHWAY	0.0642846	0.393271	Genetic Information Processing	Replication and repair
25	map04111	Cell cycle - yeast	KEGG PATHWAY	0.055389	0.411461	Cellular Processes	Cell growth and death
7	map00300	Lysine biosynthesis	KEGG PATHWAY	0.0616151	0.427198	Metabolism	Amino acid metabolism
7	map00670	One carbon pool by folate	KEGG PATHWAY	0.0616151	0.427198	Metabolism	Metabolism of cofactors and vitamins
3	map00472	D-Arginine and D-ornithine metabolism	KEGG PATHWAY	0.0757943	0.437923	Metabolism	Metabolism of other amino acids
12	map00650	Butanoate metabolism	KEGG PATHWAY	0.0822671	0.450304	Metabolism	Carbohydrate metabolism
