# Supplementary material for: Redundant and Distinct Roles of Two 14-3-3 Proteins in Fusarium sacchari, Pathogen of Sugarcane Pokkah Boeng Disease
Source: J Fungi (Basel). 2024 Mar 28;10(4):257. doi: 10.3390/jof10040257 (PMC11051555; doi:10.3390/jof10040257)
Supplement: Supplementary file 1 [file jof-10-00257-s001.zip › Table S8. KEGG enrichment analysis of down-regulated DEGs between añFsBmh1 and WT.xlsx]

## Sheet: Sheet1
Table S5. KEGG enrichment analysis of down-regulated DEGs between ΔFsBmh1 and WT
Num	Pathway id	Description	Database	Pvalue	Padjust	First Category	Second Category
22	map00010	Glycolysis / Gluconeogenesis	KEGG PATHWAY	1.14e-06	0.000119858	Metabolism	Carbohydrate metabolism
19	map00500	Starch and sucrose metabolism	KEGG PATHWAY	0.000485793	0.0127521	Metabolism	Carbohydrate metabolism
14	map00480	Glutathione metabolism	KEGG PATHWAY	0.000398955	0.0139634	Metabolism	Metabolism of other amino acids
16	map00564	Glycerophospholipid metabolism	KEGG PATHWAY	0.000332306	0.017446	Metabolism	Lipid metabolism
10	map00680	Methane metabolism	KEGG PATHWAY	0.00179641	0.0269462	Metabolism	Energy metabolism
3	map00904	Diterpenoid biosynthesis	KEGG PATHWAY	0.00137791	0.0289361	Metabolism	Metabolism of terpenoids and polyketides
11	map00030	Pentose phosphate pathway	KEGG PATHWAY	0.00168841	0.0295471	Metabolism	Carbohydrate metabolism
12	map00052	Galactose metabolism	KEGG PATHWAY	0.00358151	0.0470073	Metabolism	Carbohydrate metabolism
6	map00511	Other glycan degradation	KEGG PATHWAY	0.00559943	0.0653267	Metabolism	Glycan biosynthesis and metabolism
10	map00460	Cyanoamino acid metabolism	KEGG PATHWAY	0.00864868	0.0908112	Metabolism	Metabolism of other amino acids
2	map00998	Biosynthesis of various secondary metabolites - part 2	KEGG PATHWAY	0.0124039	0.0930289	Metabolism	Biosynthesis of other secondary metabolites
9	map00100	Steroid biosynthesis	KEGG PATHWAY	0.0122669	0.0990786	Metabolism	Lipid metabolism
3	map00591	Linoleic acid metabolism	KEGG PATHWAY	0.0115885	0.1014	Metabolism	Lipid metabolism
6	map00565	Ether lipid metabolism	KEGG PATHWAY	0.0106932	0.102071	Metabolism	Lipid metabolism
4	map00430	Taurine and hypotaurine metabolism	KEGG PATHWAY	0.0185028	0.129519	Metabolism	Metabolism of other amino acids
9	map00510	N-Glycan biosynthesis	KEGG PATHWAY	0.0287738	0.188828	Metabolism	Glycan biosynthesis and metabolism
10	map00561	Glycerolipid metabolism	KEGG PATHWAY	0.0313301	0.19351	Metabolism	Lipid metabolism
8	map04213	Longevity regulating pathway - multiple species	KEGG PATHWAY	0.0350852	0.193892	Organismal Systems	Aging
2	map00515	Mannose type O-glycan biosynthesis	KEGG PATHWAY	0.0344557	0.200992	Metabolism	Glycan biosynthesis and metabolism
8	map00513	Various types of N-glycan biosynthesis	KEGG PATHWAY	0.0408838	0.21464	Metabolism	Glycan biosynthesis and metabolism
