# Supplementary material for: Redundant and Distinct Roles of Two 14-3-3 Proteins in Fusarium sacchari, Pathogen of Sugarcane Pokkah Boeng Disease
Source: J Fungi (Basel). 2024 Mar 28;10(4):257. doi: 10.3390/jof10040257 (PMC11051555; doi:10.3390/jof10040257)
Supplement: Supplementary file 1 [file jof-10-00257-s001.zip › Table S9. KEGG enrichment analysis of down-regulated DEGs between añFsBmh2 and WT.xlsx]

## Sheet: Sheet1
Table S7. KEGG enrichment analysis of down-regulated DEGs between ΔFsBmh2 and WT
Num	Pathway id	Description	Database	Pvalue	Padjust	First Category	Second Category
26	map00500	Starch and sucrose metabolism	KEGG PATHWAY	9.53e-07	9.91e-05	Metabolism	Carbohydrate metabolism
22	map00010	Glycolysis / Gluconeogenesis	KEGG PATHWAY	1.06e-05	0.000369157	Metabolism	Carbohydrate metabolism
16	map00460	Cyanoamino acid metabolism	KEGG PATHWAY	8.67e-06	0.000451048	Metabolism	Metabolism of other amino acids
16	map00480	Glutathione metabolism	KEGG PATHWAY	0.000129073	0.00335589	Metabolism	Metabolism of other amino acids
17	map00564	Glycerophospholipid metabolism	KEGG PATHWAY	0.000486204	0.010113	Metabolism	Lipid metabolism
8	map00565	Ether lipid metabolism	KEGG PATHWAY	0.000892013	0.0154616	Metabolism	Lipid metabolism
3	map00904	Diterpenoid biosynthesis	KEGG PATHWAY	0.00205386	0.0305145	Metabolism	Metabolism of terpenoids and polyketides
13	map00052	Galactose metabolism	KEGG PATHWAY	0.00373454	0.0485491	Metabolism	Carbohydrate metabolism
10	map00680	Methane metabolism	KEGG PATHWAY	0.00484825	0.0560242	Metabolism	Energy metabolism
3	map00591	Linoleic acid metabolism	KEGG PATHWAY	0.0168317	0.145875	Metabolism	Lipid metabolism
10	map00030	Pentose phosphate pathway	KEGG PATHWAY	0.0145457	0.151275	Metabolism	Carbohydrate metabolism
2	map00998	Biosynthesis of various secondary metabolites - part 2	KEGG PATHWAY	0.0161815	0.152989	Metabolism	Biosynthesis of other secondary metabolites
11	map00561	Glycerolipid metabolism	KEGG PATHWAY	0.0305592	0.176564	Metabolism	Lipid metabolism
4	map00430	Taurine and hypotaurine metabolism	KEGG PATHWAY	0.0290391	0.177651	Metabolism	Metabolism of other amino acids
9	map00513	Various types of N-glycan biosynthesis	KEGG PATHWAY	0.0326078	0.178485	Metabolism	Glycan biosynthesis and metabolism
9	map00600	Sphingolipid metabolism	KEGG PATHWAY	0.0326078	0.178485	Metabolism	Lipid metabolism
9	map00100	Steroid biosynthesis	KEGG PATHWAY	0.0274393	0.190246	Metabolism	Lipid metabolism
9	map04213	Longevity regulating pathway - multiple species	KEGG PATHWAY	0.0274393	0.190246	Organismal Systems	Aging
17	map00520	Amino sugar and nucleotide sugar metabolism	KEGG PATHWAY	0.0268143	0.199192	Metabolism	Carbohydrate metabolism
