# Supplementary material for: Redundant and Distinct Roles of Two 14-3-3 Proteins in Fusarium sacchari, Pathogen of Sugarcane Pokkah Boeng Disease
Source: J Fungi (Basel). 2024 Mar 28;10(4):257. doi: 10.3390/jof10040257 (PMC11051555; doi:10.3390/jof10040257)
Supplement: Supplementary file 1 [file jof-10-00257-s001.zip › Table S10.KEGG enrichment analysis of up-regulated DEGs between añFsBmh2 and WT.xlsx]

## Sheet: Sheet1
Table S5. KEGG enrichment analysis of up-regulated DEGs between ΔFsBmh2 and WT
Num	Pathway id	Description	Database	Pvalue	Padjust	First Category	Second Category
43	map03008	Ribosome biogenesis in eukaryotes	KEGG PATHWAY	2.66e-11	2.92e-09	Genetic Information Processing	Translation
15	map03430	Mismatch repair	KEGG PATHWAY	0.000185695	0.0102132	Genetic Information Processing	Replication and repair
17	map03030	DNA replication	KEGG PATHWAY	0.000580623	0.0159671	Genetic Information Processing	Replication and repair
24	map00280	Valine, leucine and isoleucine degradation	KEGG PATHWAY	0.000497666	0.0182478	Metabolism	Amino acid metabolism
17	map00640	Propanoate metabolism	KEGG PATHWAY	0.000873125	0.0192088	Metabolism	Carbohydrate metabolism
21	map00250	Alanine, aspartate and glutamate metabolism	KEGG PATHWAY	0.00110408	0.0202414	Metabolism	Amino acid metabolism
7	map03450	Non-homologous end-joining	KEGG PATHWAY	0.00178079	0.0279838	Genetic Information Processing	Replication and repair
35	map03013	RNA transport	KEGG PATHWAY	0.00216537	0.0297739	Genetic Information Processing	Translation
13	map03020	RNA polymerase	KEGG PATHWAY	0.00422694	0.0516626	Genetic Information Processing	Transcription
14	map00650	Butanoate metabolism	KEGG PATHWAY	0.0191267	0.210394	Metabolism	Carbohydrate metabolism
13	map00760	Nicotinate and nicotinamide metabolism	KEGG PATHWAY	0.0210458	0.210458	Metabolism	Metabolism of cofactors and vitamins
17	map00970	Aminoacyl-tRNA biosynthesis	KEGG PATHWAY	0.0276415	0.217183	Genetic Information Processing	Translation
18	map03018	RNA degradation	KEGG PATHWAY	0.0247031	0.226445	Genetic Information Processing	Folding, sorting and degradation
8	map01040	Biosynthesis of unsaturated fatty acids	KEGG PATHWAY	0.0315338	0.231248	Metabolism	Lipid metabolism
10	map03440	Homologous recombination	KEGG PATHWAY	0.027436	0.232151	Genetic Information Processing	Replication and repair
15	map00410	beta-Alanine metabolism	KEGG PATHWAY	0.0346568	0.238266	Metabolism	Metabolism of other amino acids
21	map00230	Purine metabolism	KEGG PATHWAY	0.0499099	0.322946	Metabolism	Nucleotide metabolism
7	map00670	One carbon pool by folate	KEGG PATHWAY	0.0656378	0.361008	Metabolism	Metabolism of cofactors and vitamins
22	map04113	Meiosis - yeast	KEGG PATHWAY	0.059565	0.364008	Cellular Processes	Cell growth and death
25	map04111	Cell cycle - yeast	KEGG PATHWAY	0.0635097	0.367687	Cellular Processes	Cell growth and death
