# Supplementary material for: Redundant and Distinct Roles of Two 14-3-3 Proteins in Fusarium sacchari, Pathogen of Sugarcane Pokkah Boeng Disease
Source: J Fungi (Basel). 2024 Mar 28;10(4):257. doi: 10.3390/jof10040257 (PMC11051555; doi:10.3390/jof10040257)
Supplement: Supplementary file 1 [file jof-10-00257-s001.zip › Table S11. List and annotation of DEGs in five representation clusters.xlsx]

## Sheet: Sheet1
Table S7. List and annotation of DEGs in five representation clusters
DEGs of Cluster Ⅱ
Gene ID	NR_hit-name	NR_description	Swiss-Prot_hit-name	Swiss-Prot_description	Pfam_id	GO_id	GO_term	KO_id	KO_name	Pathway_id	Pathway_definition
FVER_00133	PNP75050.1	hypothetical protein FNYG_11538 [Fusarium nygamai]	sp|Q7SBB6|ERG3_NEUCR;	Probable Delt;	PF09435.11	GO:0008610;GO:0016021;GO:0005506;GO:001649	BP:lipid biosynthetic process;CC:integral component of membrane;MF:iron ion binding;MF:oxidoreductase activity;	K00227	SC5DL, ERG3	map00100	Steroid biosynthesis
FVER_00203	XP_031087635.1	probable sterol delta 5,6-desaturase [Fusarium proliferatum ET1]	sp|Q7SBB6|ERG3_NEUCR;	Probable Delt;	PF04116.14	GO:0008610;GO:0016021;GO:0005506;GO:001649	BP:lipid biosynthetic process;CC:integral component of membrane;MF:iron ion binding;MF:oxidoreductase activity;	K00227	SC5DL, ERG3	map00100	Steroid biosynthesis
FVER_00309	CVL11443.1	uncharacterized protein FPRN_07853 [Fusarium proliferatum]	sp|P73097|DNAJ2_SYNY3;	Chaperone protein DnaJ 2 OS=Synechocystis sp.;	PF00226.32	GO:001602	CC:integral component of membrane;	K01230	MAN1A_C, MNS1_2	map00510;map00513;map04141	N-Glycan biosynthesis;Various types of N-glycan biosynthesis;Protein processing in endoplasmic reticulum
FVER_00467	CVL08676.1	related to alcohol dehydrogenase, class C [Fusarium mangiferae]	sp|P25377|ADH7_YEAST;	NADP-dependent alcohol dehydrogenase 7 OS=Saccharomyces cerevisiae;	PF08240.13;PF00107.27;PF01262.22	GO:0008270;GO:001649	MF:zinc ion binding;MF:oxidoreductase activity;	K00002	AKR1A1, adh	map00010;map00040;map00561	Glycolysis / Gluconeogenesis;Pentose and glucuronate interconversions;Glycerolipid metabolism
FVER_00945	CVL00733.1	probable beta-glucosidase precursor [Fusarium mangiferae]	sp|B8NMR5|BGLG_ASPFN;	Probable beta-glucosidase G OS=Aspergillus flavus;	PF01915.23;PF00933.22;PF14310.7	GO:0005975;GO:000455	BP:carbohydrate metabolic process;MF:hydrolase activity, hydrolyzing O-glycosyl compounds;	K05349	bglX	map00460;map00500	Cyanoamino acid metabolism;Starch and sucrose metabolism
FVER_01002	XP_031056157.1	cytochrome c heme lyase [Fusarium oxysporum f. sp. cubense tropical race 4 54006]	sp|P14187|CCHL_NEUCR;	Cytochrome c heme lyase OS=Neurospora crassa;	PF01265.18	GO:0005743;GO:0046872;GO:000440	CC:mitochondrial inner membrane;MF:metal ion binding;MF:holocytochrome-c synthase activity;	K01764	HCCS	map00860	Porphyrin and chlorophyll metabolism
FVER_01338	XP_018759025.1	S-(hydroxymethyl)glutathione synthase [Fusarium verticillioides 7600]	sp|C7Z147|GFA_NECH7;	Putative glutathione-dependent formaldehyde-activating enzyme OS=Nectria haematococca;	PF04828.15	GO:0046294;GO:0051907;GO:000827	BP:formaldehyde catabolic process;MF:S;MF:zinc ion binding;	K03396	gfa	map00680	Methane metabolism
FVER_01629	XP_031083673.1	related to TGL2-triacylglycerol lipase [Fusarium proliferatum ET1]	sp|P54857|TGL2_YEAST;	Lipase 2 OS=Saccharomyces cerevisiae;	PF07819.14;PF12697.8;PF00561.21;PF05057.15	GO:0015031;GO:0005789;GO:001678	BP:protein transport;CC:endoplasmic reticulum membrane;MF:hydrolase activity, acting on ester bonds;	K01046	lip, TGL2	map00561	Glycerolipid metabolism
FVER_02042	XP_018246063.1	formyltetrahydrofolate deformylase [Fusarium oxysporum f. sp. lycopersici 4287]	sp|Q46339|PURU_CORS1;	Formyltetrahydrofolate deformylase OS=Corynebacterium sp.;	PF00551.20;PF01842.26	GO:0006189;GO:0008864;GO:001674	BP:'de novo' IMP biosynthetic process;MF:formyltetrahydrofolate deformylase activity;MF:hydroxymethyl-, formyl- and related transferase activity;	K01433	purU	map00630;map00670	Glyoxylate and dicarboxylate metabolism;One carbon pool by folate
FVER_02390	XP_018240135.1	homoserine kinase [Fusarium oxysporum f. sp. lycopersici 4287]	sp|P17423|KHSE_YEAST;	Homoserine kinase OS=Saccharomyces cerevisiae;	PF00288.27;PF08544.14	GO:0006566;GO:0004413;GO:000552	BP:threonine metabolic process;MF:homoserine kinase activity;MF:ATP binding;	K00872	thrB	map00260	Glycine, serine and threonine metabolism
FVER_02524	EXA42702.1	hypothetical protein FOVG_07840 [Fusarium oxysporum f. sp. pisi HDV247]	sp|O14116|YKX1_SCHPO;	Uncharacterized protein C328.01c OS=Schizosaccharomyces pombe;	PF08389.13;PF03810.20	GO:0006886;GO:0051168;GO:000853	BP:intracellular protein transport;BP:nuclear export;MF:Ran GTPase binding;	K14289	XPO5	map03013	RNA transport
FVER_03041	XP_018755905.1	hypothetical protein FVEG_09163 [Fusarium verticillioides 7600]	sp|Q8BNI4|DERL2_MOUSE;	Derlin-2 OS=Mus musculus OX=10090 GN=Derl2 PE=1 SV=2;	PF04511.16	GO:0016021;GO:000578	CC:integral component of membrane;CC:endoplasmic reticulum membrane;	K13989	DERL2_3	map04141	Protein processing in endoplasmic reticulum
FVER_03197	KAF4442908.1	formate dehydrogenase [Fusarium acutatum]	sp|G0SGU4|FDH_CHATD;	Formate dehydrogenase OS=Chaetomium thermophilum;	PF02826.20;PF00389.31	GO:0042183;GO:0005737;GO:0009326;GO:0051287;GO:0016616;GO:000886	BP:formate catabolic process;CC:cytoplasm;CC:formate dehydrogenase complex;MF:NAD binding;MF:oxidoreductase activity, acting on the CH-OH group of donors, NAD or NADP as acceptor;MF:formate dehydrogenas;	K00122	FDH	map00680;map00630	Methane metabolism;Glyoxylate and dicarboxylate metabolism
FVER_03248	RBA20824.1	hypothetical protein FPRO05_08271 [Fusarium proliferatum]	------	------	PF00010.27	GO:004698	MF:protein dimerization activity;	K00616	E2.2.1.2, talA, talB	map00030	Pentose phosphate pathway
FVER_03743	EXA42473.1	hypothetical protein FOVG_07697 [Fusarium oxysporum f. sp. pisi HDV247]	sp|P54117|G3P_COLLN;	Glyceraldehyde-3-phosphate dehydrogenase OS=Colletotrichum lindemuthianum OX=290576 GN=GPDA PE=3 SV=1;	PF02800.21;PF00044.25	------	------	K00134	GAPDH, gapA	map00010	Glycolysis / Gluconeogenesis
FVER_03801	XP_023424519.1	related to protein transport membrane glycoprotein Sec20 [Fusarium fujikuroi IMI 58289]	------	------	PF03908.14	GO:0006890;GO:0016021;GO:000548	BP:retrograde vesicle-mediated transport, Golgi to ER;CC:integral component of membrane;MF:SNAP receptor activity;	K08497	SEC20	map04130	SNARE interactions in vesicular transport
FVER_03931	PNP77228.1	hypothetical protein FNYG_09528 [Fusarium nygamai]	sp|P48507|GSH0_HUMAN;	Glutamate--cysteine ligase regulatory subunit OS=Homo sapiens OX=9606 GN=GCLM PE=1 SV=1;	PF00248.22	GO:0006750;GO:0035226;GO:001687	BP:glutathione biosynthetic process;MF:glutamate-cysteine ligase catalytic subunit binding;MF:ligase activity;	K11205	GCLM	map00270;map00480	Cysteine and methionine metabolism;Glutathione metabolism
FVER_03963	CVL03180.1	probable glutamate synthase (NADPH) [Fusarium mangiferae]	sp|Q9C102|GLT1_SCHPO;	Putative glutamate synthase [NADPH] OS=Schizosaccharomyces pombe;	PF00310.22;PF01645.18;PF04898.15;PF01493.20;PF14691.7;PF07992.15;PF13450.7;PF00070.28;PF01593.25;PF01266.25;PF12831.8;PF03486.15;PF00890.25	GO:0006537;GO:0050660;GO:0051538;GO:0016040;GO:0010181;GO:000550	BP:glutamate biosynthetic process;MF:flavin adenine dinucleotide binding;MF:3 iron, 4 sulfur cluster binding;MF:glutamate synthas;MF:FMN binding;MF:iron ion binding;	K00264	GLT1	map00250;map00910	Alanine, aspartate and glutamate metabolism;Nitrogen metabolism
FVER_04263	SCV45423.1	related to aspartate--tRNA ligase, mitochondrial [Fusarium fujikuroi]	sp|O94242|SYDM_SCHPO;	Aspartate--tRNA ligase, mitochondrial OS=Schizosaccharomyces pombe;	PF00152.21	GO:0006418;GO:0005737;GO:0016021;GO:0004812;GO:000552	BP:tRNA aminoacylation for protein translation;CC:cytoplasm;CC:integral component of membrane;MF:aminoacyl-tRNA ligase activity;MF:ATP binding;	K01876	aspS	map00970	Aminoacyl-tRNA biosynthesis
FVER_04521	XP_023426253.1	related to putative L-asparaginase precursor [Fusarium fujikuroi IMI 58289]	sp|P37595|IAAA_ECOLI;	Isoaspartyl peptidase OS=Escherichia coli;	PF01112.19	GO:001678	MF:hydrolase activity;	K01424	E3.5.1.1, ansA, ansB	map00460;map00250	Cyanoamino acid metabolism;Alanine, aspartate and glutamate metabolism
FVER_04904	XP_023433270.1	related to trehalase precursor [Fusarium fujikuroi IMI 58289]	sp|Q54QZ5|TREA_DICDI;	Trehalase OS=Dictyostelium discoideum OX=44689 GN=treh PE=3 SV=1;	PF01204.19;PF06202.15	GO:0005991;GO:000455	BP:trehalose metabolic process;MF:alpha,alpha-trehalase activity;	K01194	TREH, treA, treF	map00500	Starch and sucrose metabolism
FVER_05093	KLO91159.1	prenylcysteine lyase [Fusarium fujikuroi]	sp|P57681|PCYOX_ARATH;	Farnesylcysteine lyase OS=Arabidopsis thaliana OX=3702 GN=FLCY PE=1 SV=1;	PF07156.15;PF13450.7;PF01593.25;PF01266.25;PF13454.7	GO:0030328;GO:0016829;GO:000173	BP:prenylcysteine catabolic process;MF:lyase activity;MF:prenylcysteine oxidase activity;	K05906	PCYOX1, FCLY	map00900	Terpenoid backbone biosynthesis
FVER_05112	CVK90921.1	uncharacterized protein FMAN_09105 [Fusarium mangiferae]	sp|Q6BJW6|INV_DEBHA;	Invertase OS=Debaryomyces hansenii;	PF08244.13;PF00251.21	GO:0005975;GO:000455	BP:carbohydrate metabolic process;MF:hydrolase activity, hydrolyzing O-glycosyl compounds;	K01193	INV, sacA	map00500;map00052	Starch and sucrose metabolism;Galactose metabolism
FVER_05159	KLP02240.1	DNA repair protein NTG1 [Fusarium fujikuroi]	sp|C8VC05|NTH_EMENI;	Endonuclease III homolog OS=Emericella nidulans;	PF00730.26;PF00633.24	GO:0006285;GO:0005739;GO:0005634;GO:0140078;GO:0004519;GO:0000703;GO:000367	BP:base-excision repair, AP site formation;CC:mitochondrion;CC:nucleus;MF:class I DNA;MF:endonuclease activity;MF:oxidized pyrimidine nucleobase lesion DNA N-glycosylase activity;MF:DNA binding;	K10773	NTH	map03410	Base excision repair
FVER_05291	XP_018746895.1	glycosylphosphatidylinositol anchor biosynthesis protein 11 [Fusarium verticillioides 7600]	sp|Q4HXT5|GPI11_GIBZE;	Glycosylphosphatidylinositol anchor biosynthesis protein 11 OS=Gibberella zeae;	PF06699.12	GO:0006506;GO:0016021;GO:000578	BP:GPI anchor biosynthetic process;CC:integral component of membrane;CC:endoplasmic reticulum membrane;	K05287	PIGF	map00563	Glycosylphosphatidylinositol (GPI)-anchor biosynthesis
FVER_05455	KLP10980.1	acetylhydrolase [Fusarium fujikuroi]	sp|P70683|PAFA_CAVPO;	Platelet-activating factor acetylhydrolase OS=Cavia porcellus OX=10141 GN=PLA2G7 PE=2 SV=1;	PF03403.14;PF12740.8	GO:0016042;GO:0016021;GO:000384	BP:lipid catabolic process;CC:integral component of membrane;MF:1-alkyl-2-acetylglycerophosphocholine esterase activity;	K01062	PLA2G7, PAFAH	map00565	Ether lipid metabolism
FVER_06206	XP_031078793.1	related to nitrate reductase [Fusarium proliferatum ET1]	sp|P07850|SUOX_CHICK;	Sulfite oxidase OS=Gallus gallus OX=9031 GN=SUOX PE=1 SV=3;	PF00174.20;PF03404.17	GO:0030151;GO:001649	MF:molybdenum ion binding;MF:oxidoreductase activity;	K00387	SUOX	map00920	Sulfur metabolism
FVER_06261	SCV54238.1	related to galactose oxidase precursor [Fusarium fujikuroi]	sp|I1S2N3|GAOA_GIBZE;	Galactose oxidase OS=Gibberella zeae;	PF09118.12;PF13964.7;PF13418.7;PF01344.26;PF00024.27	------	------	K04618	GAOA	map00052	Galactose metabolism
FVER_06998	RBA19821.1	hypothetical protein FPRO05_09121 [Fusarium proliferatum]	------	------	------	------	------	K01598	PPCDC, coaC	map00770	Pantothenate and CoA biosynthesis
FVER_07159	XP_018240521.1	glutamate-cysteine ligase [Fusarium oxysporum f. sp. lycopersici 4287]	sp|Q8X0X0|GSH1_NEUCR;	Glutamate--cysteine ligase OS=Neurospora crassa;	PF03074.17	GO:0006750;GO:000435	BP:glutathione biosynthetic process;MF:glutamate-cysteine ligase activity;	K11204	GCLC	map00270;map00480	Cysteine and methionine metabolism;Glutathione metabolism
FVER_07226	XP_031079457.1	probable phosphoglyceromutase [Fusarium proliferatum ET1]	sp|G5EFZ1|GPMI_CAEEL;	2,3-bisphosphoglycerate-independent phosphoglycerate mutase OS=Caenorhabditis elegans OX=6239 GN=ipgm-1 PE=1 SV=1;	PF06415.14;PF01676.19;PF00884.24;PF01663.23	GO:0006007;GO:0005737;GO:0016021;GO:0004619;GO:003014	BP:glucose catabolic process;CC:cytoplasm;CC:integral component of membrane;MF:phosphoglycerate mutase activity;MF:manganese ion binding;	K15633	gpmI	map00680;map00010;map00260	Methane metabolism;Glycolysis / Gluconeogenesis;Glycine, serine and threonine metabolism
FVER_07538	XP_018758474.1	glutamyl-tRNA synthetase [Fusarium verticillioides 7600]	sp|O13775|SYEC_SCHPO;	Probable glutamate--tRNA ligase, cytoplasmic OS=Schizosaccharomyces pombe;	PF00749.22;PF03950.19	GO:0006424;GO:0010494;GO:0017102;GO:0005739;GO:0005737;GO:0004818;GO:000552	BP:glutamyl-tRNA aminoacylation;CC:cytoplasmic stress granule;CC:methionyl glutamyl tRNA synthetase complex;CC:mitochondrion;CC:cytoplasm;MF:glutamate-tRNA ligase activity;MF:ATP binding;	K01885	EARS, gltX	map00860;map00970	Porphyrin and chlorophyll metabolism;Aminoacyl-tRNA biosynthesis
FVER_07872	CVK98627.1	related to lysophospholipase (lpl) [Fusarium mangiferae]	sp|B0Y1M7|PLB2_ASPFC;	Lysophospholipase 2 OS=Neosartorya fumigata;	PF01735.19	GO:0009395;GO:0016021;GO:0004622;GO:002285	BP:phospholipid catabolic process;CC:integral component of membrane;MF:lysophospholipase activity;MF:transmembrane transporter activity;	K13333	PLB	map00564	Glycerophospholipid metabolism
FVER_08104	RKL35810.1	hypothetical protein BFJ72_g8510 [Fusarium proliferatum]	sp|Q9FE46|GSTFC_ARATH;	Glutathione S-transferase F12 OS=Arabidopsis thaliana OX=3702 GN=GSTF12 PE=1 SV=1;	PF02798.21;PF00043.26;PF13409.7;PF13417.7;PF13410.7;PF14497.7	GO:001674	MF:transferase activity;	K00799	GST, gst	map00480	Glutathione metabolism
FVER_08195	CVL01022.1	related to phosphatidylinositol-glycan biosynthesis, class O protein (PIG-O) [Fusarium mangiferae]	sp|Q74ZS2|GPI13_ASHGO;	GPI ethanolamine phosphate transferase 3 OS=Ashbya gossypii;	PF01663.23;PF00884.24;PF01676.19	GO:0006506;GO:0016021;GO:005137	BP:GPI anchor biosynthetic process;CC:integral component of membrane;MF:mannose-ethanolamine phosphotransferase activity;	K05288	PIGO	map00563	Glycosylphosphatidylinositol (GPI)-anchor biosynthesis
FVER_08271	SCV53796.1	related to beta-1,4-mannosyl-glycoprotein 4-beta-N-acetylglucosaminyltransferase [Fusarium fujikuroi]	sp|Q02527|MGAT3_RAT;	Beta-1,4-mannosyl-glycoprotein 4-beta-N-acetylglucosaminyltransferase OS=Rattus norvegicus OX=10116 GN=Mgat3 PE=1 SV=2;	PF04724.14	GO:0006487;GO:0016021;GO:0016020;GO:000383	BP:protein N-linked glycosylation;CC:integral component of membrane;CC:membrane;MF:beta-1,4-mannosylglycoprotein 4-beta-N-acetylglucosaminyltransferase activity;	K00737	MGAT3	map00510	N-Glycan biosynthesis
FVER_09002	KAF4428788.1	acid phosphatase [Fusarium acutatum]	sp|P52291|PPA1_PICPA;	Acid phosphatase PHO1 OS=Komagataella pastoris OX=4922 GN=PHO1 PE=2 SV=1;	PF00328.23	GO:001679	MF:phosphatase activity;	K01078	PHO	map00730;map00740	Thiamine metabolism;Riboflavin metabolism
FVER_09128	XP_023423820.1	related to traf5 protein [Fusarium fujikuroi IMI 58289]	sp|P70196|TRAF6_MOUSE;	TNF receptor-associated factor 6 OS=Mus musculus OX=10090 GN=Traf6 PE=1 SV=2;	PF02176.19;PF00097.26;PF13923.7;PF13445.7;PF13920.7;PF15227.7;PF13639.7;PF14634.7	GO:000827	MF:zinc ion binding;	K10597	UBE4B, UFD2	map04120;map04141	Ubiquitin mediated proteolysis;Protein processing in endoplasmic reticulum
FVER_09134	XP_031087036.1	related to phospholipase A2, cytosolic [Fusarium proliferatum ET1]	sp|Q50L41|PA24F_MOUSE;	Cytosolic phospholipase A2 zeta OS=Mus musculus OX=10090 GN=Pla2g4f PE=2 SV=3;	PF01735.19	GO:0009395;GO:000462	BP:phospholipid catabolic process;MF:lysophospholipase activity;	K16342	PLA2G4, CPLA2	map00565;map00564;map00592;map00591;map00590	Ether lipid metabolism;Glycerophospholipid metabolism;alpha-Linolenic acid metabolism;Linoleic acid metabolism;Arachidonic acid metabolism
FVER_09442	KAF4437135.1	Cycloeucalenol cycloisomerase [Fusarium acutatum]	sp|Q9M643|CCI1_ARATH;	Cycloeucalenol cycloisomerase OS=Arabidopsis thaliana OX=3702 GN=CPI1 PE=2 SV=1;	------	GO:0016021;GO:004779	CC:integral component of membrane;MF:cycloeucalenol cycloisomerase activity;	K08246	CPI1	map00100	Steroid biosynthesis
FVER_09532	XP_018253094.1	protein OS-9 [Fusarium oxysporum f. sp. lycopersici 4287]	sp|Q4IEA7|OS9_GIBZE;	Protein OS-9 homolog OS=Gibberella zeae;	PF07915.14	------	------	K10088	OS9	map04141	Protein processing in endoplasmic reticulum
FVER_09863	XP_023429279.1	related to CDP diacylglycerol-inositol 3-phosphatidyltransferase [Fusarium fujikuroi IMI 58289]	sp|Q10153|PIS_SCHPO;	CDP-diacylglycerol--inositol 3-phosphatidyltransferase OS=Schizosaccharomyces pombe;	PF01066.22	GO:0008654;GO:0016021;GO:001678	BP:phospholipid biosynthetic process;CC:integral component of membrane;MF:phosphotransferase activity, for other substituted phosphate groups;	K00999	CDIPT	map00564;map04070;map00562	Glycerophospholipid metabolism;Phosphatidylinositol signaling system;Inositol phosphate metabolism
FVER_09992	CVK97021.1	related to diacylglycerol pyrophosphate phosphatase DPP1 [Fusarium mangiferae]	sp|Q9XI60|LPP2_ARATH;	Lipid phosphate phosphatase 2 OS=Arabidopsis thaliana OX=3702 GN=LPP2 PE=2 SV=1;	PF01569.22	GO:0006644;GO:0016021;GO:000819	BP:phospholipid metabolic process;CC:integral component of membrane;MF:phosphatidate phosphatase activity;	K18693	DPP1, DPPL, PLPP4_5	map00564;map00561	Glycerophospholipid metabolism;Glycerolipid metabolism
FVER_10099	PNP83606.1	hypothetical protein FNYG_03169 [Fusarium nygamai]	sp|Q9N1F5|GSTO1_PIG;	Glutathione S-transferase omega-1 OS=Sus scrofa OX=9823 GN=GSTO1 PE=1 SV=2;	PF04921.15;PF15377.7	GO:000563	CC:nucleus;	K13119;K00799	FAM50, XAP5;GST, gst	map00480	Glutathione metabolism
FVER_10477	XP_018239102.1	hypothetical protein FOXG_04394 [Fusarium oxysporum f. sp. lycopersici 4287]	sp|Q9US27|LOA1_SCHPO;	Putative lysophosphatidic acid:oleoyl-CoA acyltransferase OS=Schizosaccharomyces pombe;	PF01553.22	GO:0016021;GO:001674	CC:integral component of membrane;MF:transferase activity, transferring acyl groups;	K22831	LOA1	map00564;map00561	Glycerophospholipid metabolism;Glycerolipid metabolism
FVER_10654	XP_023424272.1	probable UTR1 protein, associated with ferric reductase activity [Fusarium fujikuroi IMI 58289]	sp|P21373|UTR1_YEAST;	NA;	PF01513.22	GO:0006741;GO:0019674;GO:000395	BP:NADP biosynthetic process;BP:NAD metabolic process;MF:NAD+ kinase activity;	K00858	ppnK, NADK	map00760	Nicotinate and nicotinamide metabolism
FVER_11457	XP_018231581.1	enolase [Fusarium oxysporum f. sp. lycopersici 4287]	sp|Q7RV85|ENO_NEUCR;	Enolase OS=Neurospora crassa;	PF00113.23;PF03952.17;PF13378.7	GO:0006096;GO:0000015;GO:0000287;GO:000463	BP:glycolytic process;CC:phosphopyruvate hydratase complex;MF:magnesium ion binding;MF:phosphopyruvate hydratase activity;	K01689	ENO, eno	map00680;map00010;map03018	Methane metabolism;Glycolysis / Gluconeogenesis;RNA degradation
FVER_11581	XP_018248111.1	ribose 5-phosphate isomerase A [Fusarium oxysporum f. sp. lycopersici 4287]	sp|Q6CFH4|RPIA_YARLI;	Ribose-5-phosphate isomerase OS=Yarrowia lipolytica;	PF06026.15	GO:0009052;GO:000475	BP:pentose-phosphate shunt, non-oxidative branch;MF:ribose-5-phosphate isomerase activity;	K01807	rpiA	map00030	Pentose phosphate pathway
FVER_11602	KAF4487764.1	MPE1 Role in mRNA 3` end formation [Fusarium agapanthi]	sp|O94264|YORF_SCHPO;	Uncharacterized RING finger protein P8B7.15c OS=Schizosaccharomyces pombe;	PF08783.12;PF13696.7;PF13923.7	GO:0006397;GO:0061630;GO:0008270;GO:000367	BP:mRNA processing;MF:ubiquitin protein ligase activity;MF:zinc ion binding;MF:nucleic acid binding;	K15541	MPE1	map03015	mRNA surveillance pathway
FVER_11741	XP_023427716.1	related to heterokaryon incompatibility protein (het-6OR allele) [Fusarium fujikuroi IMI 58289]	sp|P25358|ELO2_YEAST;	Elongation of fatty acids protein 2 OS=Saccharomyces cerevisiae;	PF01151.19	------	------	K10246	ELO3	map01040;map00062	Biosynthesis of unsaturated fatty acids;Fatty acid elongation
FVER_11831	CVK84733.1	related to beta-mannosidase [Fusarium mangiferae]	sp|I2C092|MANBB_THETO;	Beta-mannosidase B OS=Thermothelomyces thermophilus OX=78579 GN=man9 PE=1 SV=1;	PF00703.22;PF17786.2	GO:0005975;GO:000455	BP:carbohydrate metabolic process;MF:hydrolase activity, hydrolyzing O-glycosyl compounds;	K01192	E3.2.1.25, MANBA, manB	map00511	Other glycan degradation
FVER_11975	RBA10029.1	hypothetical protein FPRO05_05965 [Fusarium proliferatum]	sp|P53687|HST3_YEAST;	NAD-dependent histone deacetylase HST3 OS=Saccharomyces cerevisiae;	PF02146.18	GO:007040	MF:NAD+ binding;	K11121;K20247	SIR2;EGT2	map04213;map00340;map00760	Longevity regulating pathway - multiple species;Histidine metabolism;Nicotinate and nicotinamide metabolism
FVER_12087	XP_031041287.1	glutathione S-transferase [Fusarium oxysporum NRRL 32931]	sp|O09131|GSTO1_MOUSE;	Glutathione S-transferase omega-1 OS=Mus musculus OX=10090 GN=Gsto1 PE=1 SV=2;	PF13417.7;PF13409.7;PF02798.21;PF00462.25	GO:001674	MF:transferase activity;	K00799	GST, gst	map00480	Glutathione metabolism
FVER_12143	XP_023437018.1	related to chitin synthase [Fusarium fujikuroi IMI 58289]	sp|O13395|CHS6_USTMA;	Chitin synthase 6 OS=Ustilago maydis;	PF03142.16;PF13641.7;PF12708.8;PF13632.7	GO:0016021;GO:000410	CC:integral component of membrane;MF:chitin synthase activity;	K00698;bor	CHS1;	map00520	Amino sugar and nucleotide sugar metabolism
FVER_12177	XP_018749864.1	phosphatidylserine synthase [Fusarium verticillioides 7600]	sp|O94584|PSS_SCHPO;	CDP-diacylglycerol--serine O-phosphatidyltransferase OS=Schizosaccharomyces pombe;	PF01066.22	GO:0051523;GO:0006646;GO:1903078;GO:1903068;GO:0006659;GO:0070317;GO:0010512;GO:0071852;GO:0005783;GO:0016021;GO:0005789;GO:000388	BP:cell growth mode switching, monopolar to bipolar;BP:phosphatidylethanolamine biosynthetic process;BP:positive regulation of protein localization to plasma membrane;BP:positive regulation of protein localization to cell tip;BP:phosphatidylserine biosynthetic process;BP:negative regulation of G0 to G1 transition;BP:negative regulation of phosphatidylinositol biosynthetic process;BP:fungal-type c…	K17103	CHO1, pssA	map00564;map00260	Glycerophospholipid metabolism;Glycine, serine and threonine metabolism
FVER_12375	KAF4416209.1	fatty acid transporter FAT2 [Fusarium acutatum]	sp|O74976|FAT2_SCHPO;	Putative peroxisomal-coenzyme A synthetase OS=Schizosaccharomyces pombe;	PF00501.29;PF13193.7;PF03321.14	GO:000382	MF:catalytic activity;	K22133	AAE3	map00630	Glyoxylate and dicarboxylate metabolism
FVER_13343	KLO87989.1	putative alcohol dehydrogenase (NADP+) [Fusarium fujikuroi]	sp|Q04894|ADH6_YEAST;	NADP-dependent alcohol dehydrogenase 6 OS=Saccharomyces cerevisiae;	PF08240.13;PF00107.27;PF02826.20;PF01262.22	GO:0008270;GO:001649	MF:zinc ion binding;MF:oxidoreductase activity;	K00002	AKR1A1, adh	map00010;map00040;map00561	Glycolysis / Gluconeogenesis;Pentose and glucuronate interconversions;Glycerolipid metabolism
FVER_13452	EXL76187.1	hypothetical protein FOPG_08900 [Fusarium oxysporum f. sp. conglutinans race 2 54008]	sp|C7Z9Z4|MTND_NECH7;	1,2-dihydroxy-3-keto-5-methylthiopentene dioxygenase OS=Nectria haematococca;	PF03079.15;PF07883.12;PF02311.20	GO:0019509;GO:0005737;GO:0005634;GO:0010308;GO:0010309;GO:000550	BP:L-methionine biosynthetic process from methylthioadenosine;CC:cytoplasm;CC:nucleus;MF:acireductone dioxygenas;MF:acireductone dioxygenase [iro;MF:iron ion binding;	K08967	mtnD, mtnZ, ADI1	map00270	Cysteine and methionine metabolism
FVER_13623	SCV26445.1	related to CAX4 protein [Fusarium fujikuroi]	sp|Q9C2M6|DOPP_NEUCR;	Putative dolichyldiphosphatase OS=Neurospora crassa;	PF01569.22	GO:0016021;GO:001678	CC:integral component of membrane;MF:hydrolase activity;	K07252	DOLPP1	map00510	N-Glycan biosynthesis
FVER_13856	XP_018241563.1	DNA excision repair protein ERCC-1 [Fusarium oxysporum f. sp. lycopersici 4287]	sp|Q06182|SWI10_SCHPO;	Mating-type switching protein swi10 OS=Schizosaccharomyces pombe;	PF03834.15	GO:0006281;GO:0005634;GO:0004519;GO:000368	BP:DNA repair;CC:nucleus;MF:endonuclease activity;MF:damaged DNA binding;	K10849	ERCC1	map03420	Nucleotide excision repair
FVER_13921	CVL04214.1	probable MNN2-type II membrane protein [Fusarium mangiferae]	sp|Q59KJ7|MNN21_CANAL;	Alpha-1,2-mannosyltransferase MNN21 OS=Candida albicans;	PF11051.9	GO:0006486;GO:0016021;GO:001675	BP:protein glycosylation;CC:integral component of membrane;MF:transferase activity, transferring glycosyl groups;	K05535	MNN2	map00513	Various types of N-glycan biosynthesis
FVER_14214	CVK86303.1	related to ZRT1 Zinc transporter I [Fusarium mangiferae]	sp|P32804|ZRT1_YEAST;	Zinc-regulated transporter 1 OS=Saccharomyces cerevisiae;	PF08240.13;PF00107.27;PF16912.6;PF01262.22;PF13602.7	GO:0016021;GO:000538	CC:integral component of membrane;MF:zinc ion transmembrane transporter activity;	K18369	adh2	map00640	Propanoate metabolism
FVER_14405	XP_023427130.1	mannitol dehydrogenase [Fusarium fujikuroi IMI 58289]	sp|Q8NK50|MTDH_HYPJE;	NADP-dependent mannitol dehydrogenase OS=Hypocrea jecorina OX=51453 GN=lxr1 PE=1 SV=1;	PF13561.7;PF00106.26;PF08659.11	------	------	K17742	SOU1	map00051	Fructose and mannose metabolism
FVER_14634	XP_031082779.1	probable aspartate-semialdehyde dehydrogenase [Fusarium proliferatum ET1]	sp|P78780|DHAS_SCHPO;	Probable aspartate-semialdehyde dehydrogenase OS=Schizosaccharomyces pombe;	PF02774.19;PF01118.25	GO:0008652;GO:0051287;GO:0050661;GO:0004073;GO:004698	BP:cellular amino acid biosynthetic process;MF:NAD binding;MF:NADP binding;MF:aspartate-semialdehyde dehydrogenase activity;MF:protein dimerization activity;	K00133	asd	map00270;map00300;map00260;map00261	Cysteine and methionine metabolism;Lysine biosynthesis;Glycine, serine and threonine metabolism;Monobactam biosynthesis
FVER_14638	CVK94848.1	related to glucan 1,3-beta-glucosidase [Fusarium mangiferae]	sp|O13990|BGL2_SCHPO;	Glucan 1,3-beta-glucosidase OS=Schizosaccharomyces pombe;	PF00332.19	GO:0005975;GO:000455	BP:carbohydrate metabolic process;MF:hydrolase activity, hydrolyzing O-glycosyl compounds;	K01210	E3.2.1.58	map00500	Starch and sucrose metabolism
FVER_00220	XP_031081522.1	related to L-lactate dehydrogenase (cytochrome) [Fusarium proliferatum ET1]	sp|P09437|CYB2_WICAO;	Cytochrome b2, mitochondrial OS=Wickerhamomyces anomalus OX=4927 GN=CYB2 PE=1 SV=2;	PF01070.19;PF01645.18;PF05690.15	GO:0016491;GO:001018	MF:oxidoreductase activity;MF:FMN binding;	K00101	lldD	map00620	Pyruvate metabolism
FVER_01550	KLO80825.1	putative phosphomannose isomerase (manA) [Fusarium fujikuroi]	sp|Q870Y1|MPI_NEUCR;	Mannose-6-phosphate isomerase OS=Neurospora crassa;	PF01238.22	GO:0005975;GO:0006486;GO:0009298;GO:0000032;GO:0004476;GO:000827	BP:carbohydrate metabolic process;BP:protein glycosylation;BP:GDP-mannose biosynthetic process;BP:cell wall mannoprotein biosynthetic process;MF:mannose-6-phosphate isomerase activity;MF:zinc ion binding;	K01809	manA, MPI	map00520;map00051	Amino sugar and nucleotide sugar metabolism;Fructose and mannose metabolism
FVER_01672	XP_031057205.1	adenosine kinase [Fusarium oxysporum f. sp. cubense tropical race 4 54006]	sp|P78825|ADK_SCHPO;	Adenosine kinase OS=Schizosaccharomyces pombe;	PF00294.25	GO:0006166;GO:000400	BP:purine ribonucleoside salvage;MF:adenosine kinase activity;	K00856	E2.7.1.20, ADK	map00230	Purine metabolism
FVER_02475	XP_018243552.1	aldose 1-epimerase [Fusarium oxysporum f. sp. lycopersici 4287]	sp|P04397|GAL10_YEAST;	Bifunctional protein GAL10 OS=Saccharomyces cerevisiae;	PF01263.21	GO:0005975;GO:0030246;GO:001685	BP:carbohydrate metabolic process;MF:carbohydrate binding;MF:isomerase activity;	K01785	galM, GALM	map00010;map00052	Glycolysis / Gluconeogenesis;Galactose metabolism
FVER_02610	EXL60763.1	2,3-bisphosphoglycerate-dependent phosphoglycerate mutase [Fusarium oxysporum f. sp. radicis-lycopersici 26381]	sp|A1SP05|GPMA_NOCSJ;	2,3-bisphosphoglycerate-dependent phosphoglycerate mutase OS=Nocardioides sp.;	PF00300.23	GO:0006096;GO:000461	BP:glycolytic process;MF:phosphoglycerate mutase activity;	K01834	PGAM, gpmA	map00680;map00010;map00260	Methane metabolism;Glycolysis / Gluconeogenesis;Glycine, serine and threonine metabolism
FVER_03077	KLP20103.1	uncharacterized protein LW94_12216 [Fusarium fujikuroi]	sp|O14368|HSP16_SCHPO;	Heat shock protein 16 OS=Schizosaccharomyces pombe;	PF00011.22;PF17886.2	------	------	K13993	HSP20	map04141	Protein processing in endoplasmic reticulum
FVER_03150	XP_023436169.1	related to low-affinity hexose transporter HXT3 [Fusarium fujikuroi IMI 58289]	sp|O74969|GHT2_SCHPO;	High-affinity glucose transporter ght2 OS=Schizosaccharomyces pombe;	PF00083.25;PF07690.17	GO:0008643;GO:0016021;GO:002285	BP:carbohydrate transport;CC:integral component of membrane;MF:transmembrane transporter activity;	K08139	HXT	map04113	Meiosis - yeast
FVER_03672	XP_018755501.1	chitinase 1 [Fusarium verticillioides 7600]	sp|P32470|CHI1_APHAL;	Chitinase 1 OS=Aphanocladium album OX=12942 GN=CHI1 PE=1 SV=2;	PF00704.29	GO:0005975;GO:0008061;GO:000455	BP:carbohydrate metabolic process;MF:chitin binding;MF:hydrolase activity, hydrolyzing O-glycosyl compounds;	K01183	E3.2.1.14	map00520	Amino sugar and nucleotide sugar metabolism
FVER_03816	KLO79745.1	Uncharacterized protein LW93_7187 [Fusarium fujikuroi]	sp|P36421|SYYC_YEAST;	Tyrosine--tRNA ligase, cytoplasmic OS=Saccharomyces cerevisiae;	PF00579.26	GO:0006437;GO:0004831;GO:000552	BP:tyrosyl-tRNA aminoacylation;MF:tyrosine-tRNA ligase activity;MF:ATP binding;	K01866	YARS, tyrS	map00970	Aminoacyl-tRNA biosynthesis
FVER_04763	XP_031082992.1	related to aspartate--tRNA ligase [Fusarium proliferatum ET1]	sp|P04802|SYDC_YEAST;	Aspartate--tRNA ligase, cytoplasmic OS=Saccharomyces cerevisiae;	PF00152.21;PF01336.26	GO:0006422;GO:0005737;GO:0005634;GO:0003723;GO:0004815;GO:000552	BP:aspartyl-tRNA aminoacylation;CC:cytoplasm;CC:nucleus;MF:RNA binding;MF:aspartate-tRNA ligase activity;MF:ATP binding;	K22503	DARS	map00970	Aminoacyl-tRNA biosynthesis
FVER_05063	PNP82536.1	hypothetical protein FNYG_04245 [Fusarium nygamai]	sp|P36617|RAD16_SCHPO;	DNA repair protein rad16 OS=Schizosaccharomyces pombe;	PF02732.16	GO:0006281;GO:0004520;GO:000369	BP:DNA repair;MF:endodeoxyribonuclease activity;MF:single-stranded DNA binding;	K10848	ERCC4, XPF	map03420	Nucleotide excision repair
FVER_07006	XP_031068628.1	glucoamylase [Fusarium oxysporum f. sp. cubense tropical race 4 54006]	sp|P14804|AMYG_NEUCR;	Glucoamylase OS=Neurospora crassa;	PF00723.22;PF00686.20	GO:0000272;GO:0004339;GO:200107	BP:polysaccharide catabolic process;MF:glucan 1,4-alpha-glucosidase activity;MF:starch binding;	K01178	SGA1	map00500	Starch and sucrose metabolism
FVER_07820	XP_031047366.1	mannan polymerase complexes MNN9 subunit [Fusarium oxysporum NRRL 32931]	sp|P53697|MNN9_CANAL;	Mannan polymerase complex subunit MNN9 OS=Candida albicans;	PF03452.15	GO:0006487;GO:0000136;GO:0005801;GO:0016021;GO:0000009;GO:001675	BP:protein N-linked glycosylation;CC:alpha-1,6-mannosyltransferase complex;CC:cis-Golgi network;CC:integral component of membrane;MF:alpha-1,6-mannosyltransferase activity;MF:transferase activity, transferring glycosyl groups;	K05529	MNN9	map00513	Various types of N-glycan biosynthesis
FVER_08703	QGI90848.1	hypothetical protein CEK26_003917 [Fusarium fujikuroi]	sp|Q7S604|PURA_NEUCR;	Adenylosuccinate synthetase OS=Neurospora crassa;	PF00709.22	GO:0005634;GO:0008270;GO:000098	CC:nucleus;MF:zinc ion binding;MF:RNA polymerase II transcription factor activity, sequence-specific DNA binding;	K01939	purA, ADSS	map00250;map00230	Alanine, aspartate and glutamate metabolism;Purine metabolism
FVER_08713	XP_031076634.1	related to aspartate--tRNA ligase, mitochondrial [Fusarium proliferatum ET1]	------	------	PF07366.13;PF12680.8	GO:0030638;GO:0004812;GO:001687	BP:polyketide metabolic process;MF:aminoacyl-tRNA ligase activity;MF:ligase activity;	K01876	aspS	map00970	Aminoacyl-tRNA biosynthesis
FVER_09049	XP_031053180.1	sulfite oxidase [Fusarium oxysporum f. sp. cubense tropical race 4 54006]	sp|P51687|SUOX_HUMAN;	Sulfite oxidase, mitochondrial OS=Homo sapiens OX=9606 GN=SUOX PE=1 SV=2;	PF00174.20;PF03404.17	GO:0030151;GO:001649	MF:molybdenum ion binding;MF:oxidoreductase activity;	K00387	SUOX	map00920	Sulfur metabolism
FVER_09156	CVK86520.1	related to putative trehalase [Fusarium mangiferae]	sp|Q9Y7J3|CARME_SCHPO;	Carnosine N-methyltransferase OS=Schizosaccharomyces pombe;	PF07942.13;PF08241.13;PF08242.13	GO:001602	CC:integral component of membrane;	nhe;K19787	;CARNMT1	map00340	Histidine metabolism
FVER_10798	RKK87700.1	hypothetical protein BFJ69_g452 [Fusarium oxysporum]	------	------	PF06428.12	GO:000508	MF:guanyl-nucleotide exchange factor activity;	K07573	CSL4, EXOSC1	map03018	RNA degradation
FVER_11232	CVL02755.1	related to dna mismatch repair homologue (hpms2) [Fusarium proliferatum]	sp|Q12083|MLH3_YEAST;	DNA mismatch repair protein MLH3 OS=Saccharomyces cerevisiae;	PF13589.7;PF08676.12;PF02518.27	GO:0006298;GO:0032300;GO:0016887;GO:000552	BP:mismatch repair;CC:mismatch repair complex;MF:ATPase activity;MF:ATP binding;	K08739	MLH3	map03430	Mismatch repair
FVER_11604	KLO88970.1	putative pre-mRNA splicing protein PRP2 [Fusarium fujikuroi]	sp|Q10752|CDC28_SCHPO;	Pre-mRNA-splicing factor ATP-dependent RNA helicase-like protein cdc28 OS=Schizosaccharomyces pombe;	PF07717.17;PF04408.24;PF00271.32;PF13401.7;PF00270.30;PF13604.7;PF00437.21	GO:0034247;GO:0000349;GO:0071006;GO:0004386;GO:0003676;GO:0008186;GO:000552	BP:snoRNA splicing;BP:generation of catalytic spliceosome for first transesterification step;CC:U2-type catalytic step 1 spliceosome;MF:helicase activity;MF:nucleic acid binding;MF:RNA-dependent ATPase activity;MF:ATP binding;	K12813	DHX16	map03040	Spliceosome
FVER_12070	XP_023428912.1	probable glucose-6-phosphate isomerase [Fusarium fujikuroi IMI 58289]	sp|Q7S986|G6PI_NEUCR;	Glucose-6-phosphate isomerase OS=Neurospora crassa;	PF00342.20	GO:0006096;GO:0006094;GO:0005739;GO:000434	BP:glycolytic process;BP:gluconeogenesis;CC:mitochondrion;MF:glucose-6-phosphate isomerase activity;	K01810	GPI, pgi	map00520;map00030;map00500;map00010	Amino sugar and nucleotide sugar metabolism;Pentose phosphate pathway;Starch and sucrose metabolism;Glycolysis / Gluconeogenesis
FVER_12384	RGP63864.1	high-osmolarity-induced transcription 1 [Fusarium longipes]	------	------	PF08285.12	GO:0006486;GO:0016021;GO:0005789;GO:001675	BP:protein glycosylation;CC:integral component of membrane;CC:endoplasmic reticulum membrane;MF:transferase activity, transferring glycosyl groups;	K09659	DPM3	map00510	N-Glycan biosynthesis
DEGs of Cluster Ⅲ
Gene ID	NR_hit-name	NR_description	Swiss-Prot_hit-name	Swiss-Prot_description	Pfam_id	GO_id	GO_term	KO_id	KO_name	Pathway_id	Pathway_definition
FVER_00138	XP_031083483.1	probable Alpha-glucosidase precursor (Maltase) [Fusarium proliferatum ET1]	sp|Q12558|AGLU_ASPOR;	Alpha-glucosidase OS=Aspergillus oryzae;	PF01055.27;PF16863.6	GO:0005975;GO:0030246;GO:000455	BP:carbohydrate metabolic process;MF:carbohydrate binding;MF:hydrolase activity, hydrolyzing O-glycosyl compounds;	K01187	malZ	map00500;map00052	Starch and sucrose metabolism;Galactose metabolism
FVER_00204	CVL10908.1	related to alpha-1,6-mannosyltransferase HOC1 [Fusarium proliferatum]	sp|Q9UTR6|OCH1_SCHPO;	Initiation-specific alpha-1,6-mannosyltransferase OS=Schizosaccharomyces pombe;	PF04488.16;PF05704.13	GO:0016021;GO:000000	CC:integral component of membrane;MF:alpha-1,6-mannosyltransferase activity;	K05528	OCH1	map00513	Various types of N-glycan biosynthesis
FVER_00205	RKL41743.1	hypothetical protein BFJ72_g5083 [Fusarium proliferatum]	sp|Q09780|KIME_SCHPO;	Putative mevalonate kinase OS=Schizosaccharomyces pombe;	PF00288.27;PF08544.14;PF10509.10	GO:0016126;GO:0019287;GO:0005737;GO:0004496;GO:000552	BP:sterol biosynthetic process;BP:isopentenyl diphosphate biosynthetic process, mevalonate pathway;CC:cytoplasm;MF:mevalonate kinase activity;MF:ATP binding;	K00869	E2.7.1.36, MVK, mvaK1	map04146;map00900	Peroxisome;Terpenoid backbone biosynthesis
FVER_00270	XP_031079814.1	related to alpha-glucosidase (maltase) [Fusarium proliferatum ET1]	sp|Q9P6J3|MALT_SCHPO;	Alpha-glucosidase OS=Schizosaccharomyces pombe;	PF00128.25;PF16657.6	GO:0005975;GO:000382	BP:carbohydrate metabolic process;MF:catalytic activity;	K01182	IMA, malL	map00500;map00052	Starch and sucrose metabolism;Galactose metabolism
FVER_00297	EXA47534.1	pyridoxamine 5'-phosphate oxidase [Fusarium oxysporum f. sp. pisi HDV247]	sp|Q9UTQ1|PDX3_SCHPO;	Probable pyridoxamine 5'-phosphate oxidase OS=Schizosaccharomyces pombe;	PF10590.10;PF01243.21	GO:0008615;GO:0004733;GO:001018	BP:pyridoxine biosynthetic process;MF:pyridoxamine-phosphate oxidase activity;MF:FMN binding;	K00275	pdxH, PNPO	map00750	Vitamin B6 metabolism
FVER_00302	EXA45880.1	histone-lysine N-methyltransferase, H3 lysine-79 specific [Fusarium oxysporum f. sp. pisi HDV247]	sp|Q4IJP1|DOT1_GIBZE;	Histone-lysine N-methyltransferase, H3 lysine-79 specific OS=Gibberella zeae;	PF08614.12	GO:0006348;GO:0000077;GO:0006281;GO:0051726;GO:0005634;GO:0000781;GO:0031493;GO:003115	BP:chromatin silencing at telomere;BP:DNA damage checkpoint;BP:DNA repair;BP:regulation of cell cycle;CC:nucleus;CC:chromosome, telomeric region;MF:nucleosomal histone binding;MF:histone methyltransferase activit;	K11427	DOT1L, DOT1	map00310	Lysine degradation
FVER_00308	EGU82815.1	hypothetical protein FOXB_06618 [Fusarium oxysporum Fo5176]	sp|Q05776|UPS1_YEAST;	Protein UPS1, mitochondrial OS=Saccharomyces cerevisiae;	PF04707.15	GO:000575	CC:mitochondrial intermembrane space;	K02619	pabC	map00790	Folate biosynthesis
FVER_00350	KLO92505.1	putative alpha-galactosidase C precursor [Fusarium fujikuroi]	sp|Q92457|AGAL2_HYPJE;	Alpha-galactosidase 2 OS=Hypocrea jecorina OX=51453 GN=agl2 PE=1 SV=1;	PF02065.19;PF16875.6;PF16874.6;PF02638.16	GO:0016052;GO:005269	BP:carbohydrate catabolic process;MF:raffinose alpha-galactosidase activity;	K07407	E3.2.1.22B, galA, rafA	map00600;map00603;map00561;map00052	Sphingolipid metabolism;Glycosphingolipid biosynthesis - globo and isoglobo series;Glycerolipid metabolism;Galactose metabolism
FVER_00525	CVK90850.1	uncharacterized protein FMAN_09061 [Fusarium mangiferae]	sp|Q7RX33|EGT1_NEUCR;	Ergothioneine biosynthesis protein 1 OS=Neurospora crassa;	PF10017.10	GO:000816	MF:methyltransferase activity;	nhe;K20246	;EGT1	map00340	Histidine metabolism
FVER_00841	RKL47137.1	hypothetical protein BFJ72_g2128 [Fusarium proliferatum]	sp|S0EGG0|BEA2_GIBF5;	Ketoisovalerate reductase BEA2 OS=Gibberella fujikuroi;	PF08546.12;PF02558.17	GO:001649	MF:oxidoreductase activity;	K00077	panE, apbA	map00770	Pantothenate and CoA biosynthesis
FVER_00931	KAF4418971.1	glycosyl hydrolase family 18 [Fusarium acutatum]	sp|P20533|CHIA1_BACCI;	Chitinase A1 OS=Bacillus circulans OX=1397 GN=chiA1 PE=1 SV=1;	PF00704.29	GO:0005975;GO:000806	BP:carbohydrate metabolic process;MF:chitin binding;	K01183	E3.2.1.14	map00520	Amino sugar and nucleotide sugar metabolism
FVER_01328	CVK88357.1	probable beta-glucosidase [Fusarium mangiferae]	sp|D0VKF5|BGLA_ASPTE;	Probable beta-glucosidase A OS=Aspergillus terreus OX=33178 GN=bglA PE=2 SV=1;	PF01915.23;PF00933.22;PF14310.7	GO:0030245;GO:0102483;GO:000842	BP:cellulose catabolic process;MF:scopolin beta-glucosidase activity;MF:beta-glucosidase activity;	K05349	bglX	map00460;map00500	Cyanoamino acid metabolism;Starch and sucrose metabolism
FVER_01517	XP_031075974.1	probable H+-transporting ATPase [Fusarium proliferatum ET1]	sp|P07038|PMA1_NEUCR;	Plasma membrane ATPase OS=Neurospora crassa;	PF00122.21;PF00702.27;PF00690.27	GO:0120029;GO:0016021;GO:0005886;GO:0008553;GO:000552	BP:proton export across plasma membrane;CC:integral component of membrane;CC:plasma membrane;MF:hydrogen-exporting ATPase activity, phosphorylative mechanism;MF:ATP binding;	K01535	PMA1, PMA2	map00190	Oxidative phosphorylation
FVER_01557	XP_031060006.1	catalase-peroxidase [Fusarium oxysporum f. sp. cubense tropical race 4 54006]	sp|Q2TW34|KATG_ASPOR;	Catalase-peroxidase OS=Aspergillus oryzae;	PF00141.24	GO:0042744;GO:0006979;GO:0046872;GO:0020037;GO:000409	BP:hydrogen peroxide catabolic process;BP:response to oxidative stress;MF:metal ion binding;MF:heme binding;MF:catalase activity;	K03782	katG	map00360;map00380	Phenylalanine metabolism;Tryptophan metabolism
FVER_01652	XP_018753507.1	phosphatidylserine decarboxylase [Fusarium verticillioides 7600]	sp|P0DPA6|PSID_PSICU;	L-tryptophan decarboxylase OS=Psilocybe cubensis OX=181762 GN=psiD PE=1 SV=1;	PF12588.9;PF02666.16;PF13533.7	GO:0008654;GO:000460	BP:phospholipid biosynthetic process;MF:phosphatidylserine decarboxylase activity;	K01613	psd, PISD	map00564	Glycerophospholipid metabolism
FVER_01668	XP_018744523.1	hypothetical protein FVEG_01583 [Fusarium verticillioides 7600]	sp|Q91XA9|CHIA_MOUSE;	Acidic mammalian chitinase OS=Mus musculus OX=10090 GN=Chia PE=1 SV=2;	PF00704.29;PF00187.20	GO:0005975;GO:0008061;GO:000455	BP:carbohydrate metabolic process;MF:chitin binding;MF:hydrolase activity, hydrolyzing O-glycosyl compounds;	K01183	E3.2.1.14	map00520	Amino sugar and nucleotide sugar metabolism
FVER_01700	KAF4442317.1	F-box and WD-40 domain-containing MET30 [Fusarium acutatum]	sp|Q01277|SCONB_NEUCR;	Probable E3 ubiquitin ligase complex SCF subunit scon-2 OS=Neurospora crassa;	PF00400.33;PF12937.8;PF00646.34;PF12894.8;PF15966.6	GO:001687	MF:ligase activity;	K10259	MET30	map04111;map04120	Cell cycle - yeast;Ubiquitin mediated proteolysis
FVER_01790	XP_018751859.1	hypothetical protein FVEG_06376 [Fusarium verticillioides 7600]	sp|C8VCP8|PEX12_EMENI;	Peroxisome assembly protein 12 OS=Emericella nidulans;	PF04757.15;PF15227.7	GO:0006625;GO:0005779;GO:0008022;GO:000827	BP:protein targeting to peroxisome;CC:integral component of peroxisomal membrane;MF:protein C-terminus binding;MF:zinc ion binding;	K13345	PEX12, PAF3	map04146	Peroxisome
FVER_01791	XP_023433103.1	related to vesicle-associated membrane protein 722 [Fusarium fujikuroi IMI 58289]	sp|Q86AQ7|VAM7B_DICDI;	Vesicle-associated membrane protein 7B OS=Dictyostelium discoideum OX=44689 GN=vamp7B PE=3 SV=1;	PF00957.22;PF13774.7	GO:0016192;GO:001602	BP:vesicle-mediated transport;CC:integral component of membrane;	K08515	VAMP7	map04130	SNARE interactions in vesicular transport
FVER_01862	XP_018239801.1	hypothetical protein FOXG_04919 [Fusarium oxysporum f. sp. lycopersici 4287]	sp|Q9VVI9|CHMP5_DROME;	Charged multivesicular body protein 5 OS=Drosophila melanogaster OX=7227 GN=Vps60 PE=1 SV=2;	PF03357.22;PF05531.13;PF12128.9	GO:0032511;GO:0030447;GO:0007034;GO:000032	BP:late endosome to vacuole transport via multivesicular body sorting pathway;BP:filamentous growth;BP:vacuolar transport;CC:fungal-type vacuole membrane;	K12198	CHMP5, VPS60	map04144	Endocytosis
FVER_02052	EGU84306.1	hypothetical protein FOXB_05263 [Fusarium oxysporum Fo5176]	------	------	PF02845.17	GO:0006355;GO:0016021;GO:0030015;GO:004202	BP:regulation of transcription, DNA-templated;CC:integral component of membrane;CC:CCR4-NOT core complex;CC:host cell nucleus;	K14022	CUE1, KIS4	map04141	Protein processing in endoplasmic reticulum
FVER_02201	XP_023426593.1	related to ethanolaminephosphotransferase (aminoalcoholphosphotransferase) [Fusarium fujikuroi IMI 58289]	sp|Q550W1|CAPTC_DICDI;	Uncharacterized CDP-alcohol phosphatidyltransferase class-I family protein 3 OS=Dictyostelium discoideum OX=44689 GN=captC PE=2 SV=1;	PF01066.22	GO:0008654;GO:0016021;GO:001678	BP:phospholipid biosynthetic process;CC:integral component of membrane;MF:phosphotransferase activity, for other substituted phosphate groups;	K00993	EPT1	map00565;map00564;map00440	Ether lipid metabolism;Glycerophospholipid metabolism;Phosphonate and phosphinate metabolism
FVER_02464	RBA14646.1	cytochrome P450, family 51 (sterol 14-demethylase) [Fusarium proliferatum]	sp|E9QY26|CP51B_ASPFU;	Sterol 14-alpha demethylase OS=Neosartorya fumigata;	PF00067.23	GO:0032259;GO:0016021;GO:0004497;GO:0020037;GO:0016705;GO:0008168;GO:000550	BP:methylation;CC:integral component of membrane;MF:monooxygenase activity;MF:heme binding;MF:oxidoreductase activity, acting on paired donors, with incorporation or reduction of molecular oxygen;MF:methyltransferase activity;MF:iron ion binding;	K05917	CYP51	map00100	Steroid biosynthesis
FVER_02466	XP_031083065.1	probable SCT1-suppresses a choline-transport mutant [Fusarium proliferatum ET1]	sp|Q9P7P0|YOL4_SCHPO;	Uncharacterized acyltransferase C1718.04 OS=Schizosaccharomyces pombe;	PF01553.22	GO:0016021;GO:001674	CC:integral component of membrane;MF:transferase activity, transferring acyl groups;	K13507	GAT	map00564;map00561	Glycerophospholipid metabolism;Glycerolipid metabolism
FVER_02478	AEN14642.1	putative chitinase [Fusarium proliferatum]	sp|P09805|KTXA_KLULA;	Killer toxin subunits alpha/beta OS=Kluyveromyces lactis;	PF00704.29;PF00187.20	GO:0005975;GO:0008061;GO:000455	BP:carbohydrate metabolic process;MF:chitin binding;MF:hydrolase activity, hydrolyzing O-glycosyl compounds;	K01183	E3.2.1.14	map00520	Amino sugar and nucleotide sugar metabolism
FVER_02576	XP_018753544.1	26S protease regulatory subunit 4 [Fusarium verticillioides 7600]	sp|P36612|PRS4_SCHPO;	26S proteasome regulatory subunit 4 homolog OS=Schizosaccharomyces pombe;	PF16015.6	GO:0030163;GO:0005737;GO:0000502;GO:0016787;GO:0036402;GO:0008233;GO:000552	BP:protein catabolic process;CC:cytoplasm;CC:proteasome complex;MF:hydrolase activity;MF:proteasome-activating ATPase activity;MF:peptidase activity;MF:ATP binding;	K03062	PSMC1, RPT2	map03050	Proteasome
FVER_02739	QGI70708.1	hypothetical protein CEK27_003037 [Fusarium fujikuroi]	sp|Q8J2Q2|FUM18_GIBM7;	Sphingosine N-acyltransferase-like protein FUM18 OS=Gibberella moniliformis;	PF03798.17;PF08390.12	GO:0016021;GO:001674	CC:integral component of membrane;MF:transferase activity, transferring acyl groups;	K04709	LAG1	map00600	Sphingolipid metabolism
FVER_02817	XP_018745297.1	TATA-box-binding protein [Fusarium verticillioides 7600]	sp|Q12731|TBP_EMENI;	TATA-box-binding protein OS=Emericella nidulans;	PF00352.22	GO:0006352;GO:000367	BP:DNA-templated transcription, initiation;MF:DNA binding;	K03120	TBP, tbp	map03022	Basal transcription factors
FVER_02905	XP_018746614.1	geranylgeranyl pyrophosphate synthase [Fusarium verticillioides 7600]	sp|Q92236|GGPPS_GIBFU;	Geranylgeranyl pyrophosphate synthase OS=Gibberella fujikuroi OX=5127 GN=GGS PE=3 SV=1;	PF00348.18	GO:0033384;GO:0008299;GO:0045337;GO:0033386;GO:0005737;GO:0004161;GO:0016740;GO:0004311;GO:0004337;GO:004687	BP:geranyl diphosphate biosynthetic process;BP:isoprenoid biosynthetic process;BP:farnesyl diphosphate biosynthetic process;BP:geranylgeranyl diphosphate biosynthetic process;CC:cytoplasm;MF:dimethylallyltranstransferase activity;MF:transferase activity;MF:farnesyltranstransferase activity;MF:geranyltranstransferase activity;MF:metal ion binding;	K00804	GGPS1	map00900	Terpenoid backbone biosynthesis
FVER_03054	CVL01136.1	related to phosphotidylinositol kinase [Fusarium mangiferae]	sp|Q4IB89|ATM_GIBZE;	Serine/threonine-protein kinase TEL1 OS=Gibberella zeae;	PF11640.9;PF00454.28;PF02260.21	GO:0000723;GO:0010212;GO:0006281;GO:0016572;GO:0000077;GO:0005634;GO:0000781;GO:0004674;GO:000552	BP:telomere maintenance;BP:response to ionizing radiation;BP:DNA repair;BP:histone phosphorylation;BP:DNA damage checkpoint;CC:nucleus;CC:chromosome, telomeric region;MF:protein serine/threonine kinase activity;MF:ATP binding;	K04728	ATM, TEL1	map03440	Homologous recombination
FVER_03070	XP_031083479.1	related to choline dehydrogenase [Fusarium proliferatum ET1]	sp|A1CFL2|PATE_ASPCL;	Patulin synthase OS=Aspergillus clavatus;	PF00732.20;PF05199.14;PF01266.25;PF00890.25;PF07992.15	GO:0050660;GO:001661	MF:flavin adenine dinucleotide binding;MF:oxidoreductase activity, acting on CH-OH group of donors;	K00108	betA, CHDH	map00260	Glycine, serine and threonine metabolism
FVER_03161	AMD39171.1	phytoene synthase [Fusarium sacchari]	sp|Q8X0Z1|LCPS_GIBFU;	Bifunctional lycopene cyclase/phytoene synthase OS=Gibberella fujikuroi OX=5127 GN=carRA PE=2 SV=1;	PF00494.20	GO:0009058;GO:0016021;GO:0051996;GO:0004310;GO:001687	BP:biosynthetic process;CC:integral component of membrane;MF:squalene synthase activity;MF:farnesyl-diphosphate farnesyltransferase activity;MF:intramolecular lyase activity;	K17841	AL2	map00906	Carotenoid biosynthesis
FVER_03252	RBA15415.1	hypothetical protein FPRO05_12489 [Fusarium proliferatum]	sp|O94343|YHMA_SCHPO;	Uncharacterized MFS-type transporter C1271.10c OS=Schizosaccharomyces pombe;	PF07690.17	GO:0016021;GO:002285	CC:integral component of membrane;MF:transmembrane transporter activity;	K01426	E3.5.1.4, amiE	map00360;map00330;map00380	Phenylalanine metabolism;Arginine and proline metabolism;Tryptophan metabolism
FVER_03325	XP_031086216.1	probable catalase 2 [Fusarium proliferatum ET1]	sp|A4QUT2|KATG2_MAGO7;	Catalase-peroxidase 2 OS=Magnaporthe oryzae;	PF00141.24	GO:0042744;GO:0006979;GO:0005576;GO:0020037;GO:0004096;GO:004687	BP:hydrogen peroxide catabolic process;BP:response to oxidative stress;CC:extracellular region;MF:heme binding;MF:catalase activity;MF:metal ion binding;	K03782	katG	map00360;map00380	Phenylalanine metabolism;Tryptophan metabolism
FVER_03607	RKL49457.1	Folic acid synthesis protein fol1 [Fusarium proliferatum]	sp|P29251|FOL1_PNECA;	Folic acid synthesis protein fol1 OS=Pneumocystis carinii OX=4754 GN=fol1 PE=1 SV=1;	PF00809.23;PF01288.21	GO:0009396;GO:0003848;GO:000415	BP:folic acid-containing compound biosynthetic process;MF:2-amino-4-hydroxy-6-hydroxymethyldihydropteridine diphosphokinase activity;MF:dihydropteroate synthase activity;	K13941	folKP	map00790	Folate biosynthesis
FVER_03674	XP_031083480.1	related to phosphoenolpyruvate phosphomutase [Fusarium proliferatum ET1]	sp|P33182|PEPM_TETPY;	Phosphoenolpyruvate phosphomutase OS=Tetrahymena pyriformis OX=5908 GN=PEPM PE=1 SV=1;	PF13714.7	GO:000382	MF:catalytic activity;	K23999;K01841	form1;pepM	map00998;map00440	Biosynthesis of various secondary metabolites - part 2;Phosphonate and phosphinate metabolism
FVER_03675	CVL00251.1	uncharacterized protein FPRN_09239 [Fusarium proliferatum]	sp|O15042|SR140_HUMAN;	U2 snRNP-associated SURP motif-containing protein OS=Homo sapiens OX=9606 GN=U2SURP PE=1 SV=2;	PF01805.21	GO:0006396;GO:000372	BP:RNA processing;MF:RNA binding;	K12842	SR140	map03040	Spliceosome
FVER_03769	RBA16747.1	dynein heavy chain, cytoplasmic [Fusarium proliferatum]	sp|P78716|DYHC_FUSSO;	Dynein heavy chain, cytoplasmic OS=Fusarium solani subsp. pisi OX=70791 GN=DHC1 PE=3 SV=1;	PF12774.8;PF08385.13;PF08393.14;PF12781.8;PF12780.8;PF12777.8;PF12775.8;PF18198.2;PF07728.15;PF03028.16;PF17852.2;PF00004.30;PF17857.2	GO:0007018;GO:0030286;GO:0003777;GO:000552	BP:microtubule-based movement;CC:dynein complex;MF:microtubule motor activity;MF:ATP binding;	K10413	DYNC1H	map04145	Phagosome
FVER_03809	XP_023433859.1	related to peroxisomal amine oxidase (copper-containing) [Fusarium fujikuroi IMI 58289]	sp|P27101|TCBF_PSESQ;	Maleylacetate reductase OS=Pseudomonas sp.;	PF01179.21;PF09248.11;PF02727.17	GO:0009308;GO:0048038;GO:0005507;GO:000813	BP:amine metabolic process;MF:quinone binding;MF:copper ion binding;MF:primary amine oxidase activity;	K00276	AOC3, AOC2, tynA	map00350;map00360;map00410;map00260	Tyrosine metabolism;Phenylalanine metabolism;beta-Alanine metabolism;Glycine, serine and threonine metabolism
FVER_04011	XP_031071526.1	5'-methylthioadenosine phosphorylase [Fusarium oxysporum f. sp. cubense tropical race 4 54006]	sp|C7YLQ3|MTAP_NECH7;	S-methyl-5'-thioadenosine phosphorylase OS=Nectria haematococca;	PF01048.21	GO:0019509;GO:0006166;GO:0005737;GO:0005634;GO:001706	BP:L-methionine biosynthetic process from methylthioadenosine;BP:purine ribonucleoside salvage;CC:cytoplasm;CC:nucleus;MF:S-methyl-5-thioadenosine phosphorylase activity;	K00772	mtaP, MTAP	map00270	Cysteine and methionine metabolism
FVER_04133	CVL04214.1	probable MNN2-type II membrane protein [Fusarium mangiferae]	sp|A0A0A2IDH4|CNSB_PENEN;	L-tryptophan decarboxylase cnsB OS=Penicillium expansum OX=27334 GN=cnsB PE=1 SV=1;	PF00445.19	GO:0006486;GO:0016021;GO:001675	BP:protein glycosylation;CC:integral component of membrane;MF:transferase activity, transferring glycosyl groups;	K05535	MNN2	map00513	Various types of N-glycan biosynthesis
FVER_04213	KAF4435995.1	Aldo keto reductase [Fusarium acutatum]	sp|P14065|GCY1_YEAST;	Glycerol 2-dehydrogenase;	PF00248.22	GO:0048037;GO:001649	MF:cofactor binding;MF:oxidoreductase activity;	K18097	GCY1	map00561	Glycerolipid metabolism
FVER_04296	RBA17185.1	hypothetical protein FPRO05_01909 [Fusarium proliferatum]	sp|Q9UT42|LSB6_SCHPO;	Phosphatidylinositol 4-kinase lsb6 OS=Schizosaccharomyces pombe;	PF00454.28	GO:0005524;GO:000443	MF:ATP binding;MF:1-phosphatidylinositol 4-kinase activity;	K13711	PI4K2	map04070;map00562	Phosphatidylinositol signaling system;Inositol phosphate metabolism
FVER_04519	CVL04619.1	related to galactokinase [Fusarium mangiferae]	sp|O42821|GAL1_CANPA;	Galactokinase OS=Candida parapsilosis OX=5480 GN=GAL1 PE=3 SV=1;	PF10509.10;PF00288.27;PF08544.14	GO:0006012;GO:0005737;GO:0004335;GO:0005534;GO:000552	BP:galactose metabolic process;CC:cytoplasm;MF:galactokinase activity;MF:galactose binding;MF:ATP binding;	K00849	galK	map00520;map00052	Amino sugar and nucleotide sugar metabolism;Galactose metabolism
FVER_04572	CVK83574.1	probable dolichyl-phosphate-mannose--protein O-mannosyltransferase [Fusarium mangiferae]	sp|Q59X23|PMT4_CANAL;	Dolichyl-phosphate-mannose--protein mannosyltransferase 4 OS=Candida albicans;	PF02366.19;PF16192.6;PF02815.20	GO:0006493;GO:0016021;GO:000003	BP:protein O-linked glycosylation;CC:integral component of membrane;MF:mannosyltransferase activity;	K00728	POMT, pmt	map00514;map00515	Other types of O-glycan biosynthesis;Mannose type O-glycan biosynthesis
FVER_04674	TVY72307.1	DNA replication ATP-dependent helicase/nuclease DNA2 [Fusarium oxysporum f. sp. cubense]	sp|Q9URU2|DNA2_SCHPO;	DNA replication ATP-dependent helicase/nuclease dna2 OS=Schizosaccharomyces pombe;	PF08696.12;PF13087.7;PF13086.7;PF13604.7;PF13245.7;PF01930.18;PF05127.15	GO:0033567;GO:0017116;GO:001710	BP:DNA replication, Okazaki fragment processing;MF:single-stranded DNA-dependent ATP-dependent DNA helicase activity;MF:5'-flap endonuclease activity;	K10742	DNA2	map03030	DNA replication
FVER_05158	XP_018752476.1	hypothetical protein FVEG_06828 [Fusarium verticillioides 7600]	sp|P34024|PLC_LISMO;	1-phosphatidylinositol phosphodiesterase OS=Listeria monocytogenes serovar 1/2a;	PF00388.20	GO:0006629;GO:0016021;GO:000808	BP:lipid metabolic process;CC:integral component of membrane;MF:phosphoric diester hydrolase activity;	K01771	plc	map00562	Inositol phosphate metabolism
FVER_05160	EMT66709.1	Putative acetate kinase [Fusarium oxysporum f. sp. cubense race 4]	sp|Q2HAJ4|ACKA_CHAGB;	Probable acetate kinase OS=Chaetomium globosum;	PF00871.18	GO:0006085;GO:0006082;GO:0000287;GO:0005524;GO:000877	BP:acetyl-CoA biosynthetic process;BP:organic acid metabolic process;MF:magnesium ion binding;MF:ATP binding;MF:acetate kinase activity;	K00925	ackA	map00680;map00640;map00620;map00430	Methane metabolism;Propanoate metabolism;Pyruvate metabolism;Taurine and hypotaurine metabolism
FVER_05213	XP_031055974.1	NADPH oxidase [Fusarium oxysporum f. sp. cubense tropical race 4 54006]	sp|Q8CIZ9|NOX1_MOUSE;	NADPH oxidase 1 OS=Mus musculus OX=10090 GN=Nox1 PE=1 SV=2;	PF08030.13;PF08022.13;PF01794.20	GO:0016021;GO:001649	CC:integral component of membrane;MF:oxidoreductase activity;	K08008	NOX1, MOX1	map04933	AGE-RAGE signaling pathway in diabetic complications
FVER_05346	CVL11083.1	related to diacylglycerol acyltransferase type 2a [Fusarium proliferatum]	sp|Q96UY2|DGT2A_UMBRA;	Diacylglycerol O-acyltransferase 2A OS=Umbelopsis ramanniana OX=41833 GN=DGAT2A PE=1 SV=1;	PF03982.14	GO:0016021;GO:001674	CC:integral component of membrane;MF:transferase activity, transferring acyl groups other than amino-acyl groups;	K14457	MOGAT2, MGAT2	map00561	Glycerolipid metabolism
FVER_05362	KLP18214.1	putative glycosylasparaginase [Fusarium fujikuroi]	sp|Q64191|ASPG_MOUSE;	;	PF01112.19	GO:001678	MF:hydrolase activity;	K01444	AGA, aspG	map00511	Other glycan degradation
FVER_05363	KAF4498416.1	biotin synthase [Fusarium agapanthi]	sp|Q5AYI7|BIOB_EMENI;	Biotin synthase, mitochondrial OS=Emericella nidulans;	PF06968.14;PF04055.22	GO:0009102;GO:0004076;GO:005153	BP:biotin biosynthetic process;MF:biotin synthase activity;MF:iron-sulfur cluster binding;	K01012	bioB	map00780	Biotin metabolism
FVER_05371	KAF4429404.1	heterokaryon incompatibility (het-6OR allele) [Fusarium acutatum]	sp|D4B387|GGT1_ARTBC;	Glutathione hydrolase proenzyme OS=Arthroderma benhamiae;	PF01019.22	GO:0006751;GO:0016740;GO:003637	BP:glutathione catabolic process;MF:transferase activity;MF:glutathione hydrolase activity;	K00681	ggt	map00460;map00480;map00430	Cyanoamino acid metabolism;Glutathione metabolism;Taurine and hypotaurine metabolism
FVER_05494	SCO06938.1	related to periplasmic beta-glucosidase/beta-xylosidase precursor [Fusarium fujikuroi]	sp|B8NGU6|BGLC_ASPFN;	Probable beta-glucosidase C OS=Aspergillus flavus;	PF00933.22;PF01915.23	GO:0005975;GO:000455	BP:carbohydrate metabolic process;MF:hydrolase activity, hydrolyzing O-glycosyl compounds;	K05349	bglX	map00460;map00500	Cyanoamino acid metabolism;Starch and sucrose metabolism
FVER_05514	EXL78220.1	hypothetical protein FOPG_07619 [Fusarium oxysporum f. sp. conglutinans race 2 54008]	sp|O94474|SKI3_SCHPO;	Superkiller protein 3 OS=Schizosaccharomyces pombe;	PF13432.7;PF07719.18;PF18833.2;PF13428.7;PF00515.29;PF14559.7;PF13181.7;PF13414.7;PF13424.7;PF13176.7;PF12895.8	GO:0006401;GO:005508	BP:RNA catabolic process;CC:Ski complex;	K12600	SKI3, TTC37	map03018	RNA degradation
FVER_05596	KLP08062.1	malate dehydrogenase (oxaloacetate-decarboxylating) (NADP+) [Fusarium fujikuroi]	sp|Q6TU48|MAOX_DICDI;	NADP-dependent malic enzyme OS=Dictyostelium discoideum OX=44689 GN=malA PE=2 SV=1;	PF03949.16;PF00390.20	GO:0051287;GO:0004471;GO:004687	MF:NAD binding;MF:malate dehydrogenas;MF:metal ion binding;	K00029	E1.1.1.40, maeB	map00620	Pyruvate metabolism
FVER_05641	XP_031045204.1	uncharacterized protein FOYG_05057 [Fusarium oxysporum NRRL 32931]	sp|P49776|APH1_SCHPO;	Bi;	PF01230.24;PF11969.9	GO:000382	MF:catalytic activity;	K01522	FHIT	map00230	Purine metabolism
FVER_05737	CVL00449.1	gibberellin cluster-GGPP-synthase [Fusarium proliferatum]	sp|S0E627|GA5_GIBF5;	Geranylgeranyl pyrophosphate synthase 2 OS=Gibberella fujikuroi;	PF00348.18	GO:0008299;GO:001674	BP:isoprenoid biosynthetic process;MF:transferase activity;	K00804;K18685	GGPS1;ACOS	map00900	Terpenoid backbone biosynthesis
FVER_05822	XP_023431793.1	related to response regulator Mcs4 [Fusarium fujikuroi IMI 58289]	sp|P87323|MCS4_SCHPO;	Response regulator mcs4 OS=Schizosaccharomyces pombe;	PF00072.25	GO:000016	BP:phosphorelay signal transduction system;	K11233	SSK1	map04011;map04139	MAPK signaling pathway - yeast;Mitophagy - yeast
FVER_05971	KAF4502300.1	Zinc finger, MYND-type [Fusarium agapanthi]	------	------	PF01753.19	GO:004687	MF:metal ion binding;	K08334	BECN, VPS30, ATG6	map04136;map04138	Autophagy - other;Autophagy - yeast
FVER_06004	KLO89801.1	putative pyrroline-5-carboxylate reductase [Fusarium fujikuroi]	sp|Q12740|P5CR_LOPAR;	Pyrroline-5-carboxylate reductase OS=Lophium arboricola OX=42465 GN=P5CR PE=2 SV=1;	PF14748.7;PF03807.18	GO:0055129;GO:0016021;GO:000473	BP:L-proline biosynthetic process;CC:integral component of membrane;MF:pyrroline-5-carboxylate reductase activity;	K00286	proC	map00330	Arginine and proline metabolism
FVER_06040	XP_018757316.1	dolichol-phosphate mannosyltransferase [Fusarium verticillioides 7600]	sp|O14466|DPM1_SCHPO;	Dolichol-phosphate mannosyltransferase OS=Schizosaccharomyces pombe;	PF00535.27;PF13641.7;PF13506.7;PF10111.10	GO:0006486;GO:0005783;GO:000458	BP:protein glycosylation;CC:endoplasmic reticulum;MF:dolichyl-phosphate beta-D-mannosyltransferase activity;	K00721	DPM1	map00510	N-Glycan biosynthesis
FVER_06117	RBA22463.1	hypothetical protein FPRO05_00810 [Fusarium proliferatum]	sp|Q10494|YDG7_SCHPO;	Uncharacterized oxidoreductase C26F1.07 OS=Schizosaccharomyces pombe;	PF00248.22	GO:001649	MF:oxidoreductase activity;	K01426	E3.5.1.4, amiE	map00360;map00330;map00380	Phenylalanine metabolism;Arginine and proline metabolism;Tryptophan metabolism
FVER_06577	CVL05976.1	probable beta-glucosidase precursor [Fusarium proliferatum]	sp|G4N7Z0|CEL3B_MAGO7;	Beta-glucosidase cel3A OS=Magnaporthe oryzae;	PF01915.23;PF00933.22;PF14310.7	GO:0005975;GO:000455	BP:carbohydrate metabolic process;MF:hydrolase activity, hydrolyzing O-glycosyl compounds;	K05349	bglX	map00460;map00500	Cyanoamino acid metabolism;Starch and sucrose metabolism
FVER_06807	RKL45778.1	hypothetical protein BFJ72_g3323 [Fusarium proliferatum]	sp|S0EGG0|BEA2_GIBF5;	Ketoisovalerate reductase BEA2 OS=Gibberella fujikuroi;	PF08546.12;PF02558.17	GO:0043807;GO:001649	MF:3-methyl-2-oxobutanoate dehydrogenas;MF:oxidoreductase activity;	K00077	panE, apbA	map00770	Pantothenate and CoA biosynthesis
FVER_06842	XP_031086042.1	related to TAD2-tRNA-specific adenosine deaminase 2 [Fusarium proliferatum ET1]	sp|Q7RX33|EGT1_NEUCR;	Ergothioneine biosynthesis protein 1 OS=Neurospora crassa;	PF03781.17;PF12867.8	------	------	K20246	EGT1	map00340	Histidine metabolism
FVER_06878	XP_031082892.1	related to beta-glucosidase [Fusarium proliferatum ET1]	sp|Q56078|BGLX_SALTY;	Periplasmic beta-glucosidase OS=Salmonella typhimurium;	PF00933.22;PF01915.23;PF14310.7	GO:0005975;GO:000455	BP:carbohydrate metabolic process;MF:hydrolase activity, hydrolyzing O-glycosyl compounds;	K05349	bglX	map00460;map00500	Cyanoamino acid metabolism;Starch and sucrose metabolism
FVER_06938	CVK95721.1	uncharacterized protein FMAN_13674 [Fusarium mangiferae]	------	------	PF00397.27;PF08407.12	GO:000410	MF:chitin synthase activity;	K16687	YAP1, Yki	map04392	Hippo signaling pathway - multiple species
FVER_07023	XP_023424140.1	probable adenylate cyclase [Fusarium fujikuroi IMI 58289]	sp|Q01513|CYAA_PODAS;	Adenylate cyclase OS=Podospora anserina OX=2587412 PE=3 SV=1;	PF00481.22;PF13855.7;PF12799.8;PF00211.21;PF08509.12	GO:0035556;GO:0006171;GO:0000287;GO:000401	BP:intracellular signal transduction;BP:cAMP biosynthetic process;MF:magnesium ion binding;MF:adenylate cyclase activity;	K01768	E4.6.1.1	map04213;map04113;map00230	Longevity regulating pathway - multiple species;Meiosis - yeast;Purine metabolism
FVER_07056	XP_018757237.1	phosphoglycerate kinase [Fusarium verticillioides 7600]	sp|P24590|PGK_HYPRU;	Phosphoglycerate kinase OS=Hypocrea rufa OX=5547 GN=pgk1 PE=3 SV=2;	PF00162.20	GO:0006096;GO:0004618;GO:000552	BP:glycolytic process;MF:phosphoglycerate kinase activity;MF:ATP binding;	K00927	PGK, pgk	map00010	Glycolysis / Gluconeogenesis
FVER_07110	CVL02817.1	probable protein kinase PAK1 [Fusarium proliferatum]	sp|Q8X0H8|ALG2_NEUCR;	Alpha-1,3/1,6-mannosyltransferase alg-2 OS=Neurospora crassa;	PF00534.21;PF13439.7;PF13692.7;PF13579.7;PF13524.7	GO:0005524;GO:000467	MF:ATP binding;MF:protein kinase activity;	K03843;K21157	ALG2;SAK1	map00510;map00513;map04138	N-Glycan biosynthesis;Various types of N-glycan biosynthesis;Autophagy - yeast
FVER_07111	XP_031083633.1	probable FMN-dependent 2-nitropropane dioxygenase [Fusarium proliferatum ET1]	sp|Q01284|2NPD_NEUCR;	Nitronate monooxygenase OS=Neurospora crassa;	PF03060.16;PF00478.26;PF01070.19;PF01645.18	GO:0018580;GO:005121	MF:nitronate monooxygenase activity;MF:dioxygenase activity;	K00459	ncd2, npd	map00910	Nitrogen metabolism
FVER_07164	XP_023437532.1	related to polyamine oxidase precursor [Fusarium fujikuroi IMI 58289]	sp|A0A0P0XM10|PAO6_ORYSJ;	Polyamine oxidase 6 OS=Oryza sativa subsp. japonica OX=39947 GN=PAO6 PE=2 SV=1;	PF01593.25;PF13450.7;PF01266.25;PF13738.7;PF07992.15;PF01134.23;PF01494.20	GO:001649	MF:oxidoreductase activity;	K13366	MPAO, PAO1	map00330;map00410	Arginine and proline metabolism;beta-Alanine metabolism
FVER_07313	XP_031075320.1	probable protein kinase sck1, cAMP-dependent [Fusarium proliferatum ET1]	sp|Q5AHG6|SCH9_CANAL;	Serine/threonine-protein kinase SCH9 OS=Candida albicans;	PF00069.26;PF07714.18;PF00433.25;PF00168.31;PF14531.7	GO:0004674;GO:000552	MF:protein serine/threonine kinase activity;MF:ATP binding;	K19800	SCH9	map04213;map04138	Longevity regulating pathway - multiple species;Autophagy - yeast
FVER_07414	KAF4497235.1	small nuclear ribonucleo D3 [Fusarium agapanthi]	------	------	------	------	------	K11088	SNRPD3, SMD3	map03040;map04139	Spliceosome;Mitophagy - yeast
FVER_07460	RBR12714.1	hypothetical protein FVER53590_04985 [Fusarium verticillioides]	sp|Q59RR0|ACE2_CANAL;	Cell wall transcription factor ACE2 OS=Candida albicans;	PF00096.27;PF13465.7	GO:000367	MF:nucleic acid binding;	K09202	SWI5	map04111	Cell cycle - yeast
FVER_07595	EGU89225.1	hypothetical protein FOXB_00178 [Fusarium oxysporum Fo5176]	sp|O94467|OYEC_SCHPO;	Putative NADPH dehydrogenase C23G7.10c OS=Schizosaccharomyces pombe;	PF00724.21	GO:0016491;GO:001018	MF:oxidoreductase activity;MF:FMN binding;	K09580	PDIA1, P4HB	map04141	Protein processing in endoplasmic reticulum
FVER_07746	XP_023427111.1	uncharacterized protein FFUJ_14890 [Fusarium fujikuroi IMI 58289]	------	------	------	------	------	K00826	E2.6.1.42, ilvE	map00270;map00770;map00280;map00290	Cysteine and methionine metabolism;Pantothenate and CoA biosynthesis;Valine, leucine and isoleucine degradation;Valine, leucine and isoleucine biosynthesis
FVER_07878	KLO91958.1	ethanolamine kinase [Fusarium fujikuroi]	sp|Q9D4V0|EKI1_MOUSE;	Ethanolamine kinase 1 OS=Mus musculus OX=10090 GN=Etnk1 PE=1 SV=2;	PF01633.21;PF01636.24;PF02958.21	GO:0016021;GO:001630	CC:integral component of membrane;MF:kinase activity;	K00894	ETNK, EKI	map00564	Glycerophospholipid metabolism
FVER_07911	CVK99422.1	related to alpha,alpha-trehalose-phosphate synthase (UDP-forming) [Fusarium mangiferae]	sp|O14081|TPSX_SCHPO;	Putative alpha,alpha-trehalose-phosphate synthase [UDP-forming] 106 kDa subunit OS=Schizosaccharomyces pombe;	PF00982.22;PF02358.17	GO:0005992;GO:000382	BP:trehalose biosynthetic process;MF:catalytic activity;	K22337	TSL1, TPS3	map00500	Starch and sucrose metabolism
FVER_08126	CAP74389.1	copalyl-diphosphate/kaurene synthetase [Fusarium proliferatum]	sp|S0EA85|GA6_GIBF5;	Bifunctional ent-kaurene synthase OS=Gibberella fujikuroi;	------	GO:0009686;GO:0009905;GO:0046872;GO:000989	BP:gibberellin biosynthetic process;MF:ent-copalyl diphosphate synthase activity;MF:metal ion binding;MF:ent-kaurene synthase activity;	K20657	CPS-KS	map00904	Diterpenoid biosynthesis
FVER_08191	CVL01304.1	probable glucan 1,4-alpha-glucosidase [Fusarium proliferatum]	sp|P14804|AMYG_NEUCR;	Glucoamylase OS=Neurospora crassa;	PF00723.22;PF00686.20	GO:0000272;GO:0004339;GO:200107	BP:polysaccharide catabolic process;MF:glucan 1,4-alpha-glucosidase activity;MF:starch binding;	K01178	SGA1	map00500	Starch and sucrose metabolism
FVER_08251	RKL47441.1	putative ubiquitin fusion degradation protein C12B10.01c [Fusarium proliferatum]	sp|Q10435|YDE1_SCHPO;	Probable ubiquitin fusion degradation protein C12B10.01c OS=Schizosaccharomyces pombe;	PF00632.26	GO:0016874;GO:000484	MF:ligase activity;MF:ubiquitin-protein transferase activity;	K10590	TRIP12	map04120	Ubiquitin mediated proteolysis
FVER_08347	XP_018242242.1	phosphomannose isomerase type I [Fusarium oxysporum f. sp. lycopersici 4287]	sp|P29952|MPI_YEAST;	Mannose-6-phosphate isomerase OS=Saccharomyces cerevisiae;	PF01238.22	GO:0009298;GO:0005975;GO:0004476;GO:000827	BP:GDP-mannose biosynthetic process;BP:carbohydrate metabolic process;MF:mannose-6-phosphate isomerase activity;MF:zinc ion binding;	K01809	manA, MPI	map00520;map00051	Amino sugar and nucleotide sugar metabolism;Fructose and mannose metabolism
FVER_08427	XP_031089096.1	related to TGL4-triacylglycerol lipase [Fusarium proliferatum ET1]	sp|P36165|TGL4_YEAST;	Lipase 4 OS=Saccharomyces cerevisiae;	PF01036.19	GO:0016042;GO:0016020;GO:000480	BP:lipid catabolic process;CC:membrane;MF:triglyceride lipase activity;	K14674	TGL4	map00565;map00564;map00561;map00590;map00591;map00592;map00100	Ether lipid metabolism;Glycerophospholipid metabolism;Glycerolipid metabolism;Arachidonic acid metabolism;Linoleic acid metabolism;alpha-Linolenic acid metabolism;Steroid biosynthesis
FVER_08550	KLP00277.1	Glutathione S-transferase II [Fusarium fujikuroi]	sp|Q4WQZ2|TPCF_ASPFU;	Glutathione S-transferase-like protein tpcF OS=Neosartorya fumigata;	PF02798.21;PF14497.7;PF00043.26;PF13409.7;PF13410.7;PF13417.7	GO:001674	MF:transferase activity;	K00799	GST, gst	map00480	Glutathione metabolism
FVER_08552	RKL44856.1	hypothetical protein BFJ72_g3507 [Fusarium proliferatum]	sp|P50537|MAE1_SCHPO;	Malic acid transport protein OS=Schizosaccharomyces pombe;	PF10432.10	GO:0005975;GO:0004347;GO:000447	BP:carbohydrate metabolic process;MF:glucose-6-phosphate isomerase activity;MF:mannose-6-phosphate isomerase activity;	K15916	pgi-pmi	map00520;map00030;map00500;map00051;map00010	Amino sugar and nucleotide sugar metabolism;Pentose phosphate pathway;Starch and sucrose metabolism;Fructose and mannose metabolism;Glycolysis / Gluconeogenesis
FVER_08659	CVL01929.1	related to SUR2 protein [Fusarium mangiferae]	sp|P38992|SUR2_YEAST;	Sphingolipid C4-hydroxylase SUR2 OS=Saccharomyces cerevisiae;	PF04116.14	GO:0008610;GO:0016021;GO:0005506;GO:001649	BP:lipid biosynthetic process;CC:integral component of membrane;MF:iron ion binding;MF:oxidoreductase activity;	K04713	SUR2	map00600	Sphingolipid metabolism
FVER_08985	KLP02945.1	TOM1 protein [Fusarium fujikuroi]	sp|Q9P4Z1|TOM1_NEUCR;	E3 ubiquitin-protein ligase TOM1-like OS=Neurospora crassa;	PF06025.13;PF06012.13;PF00632.26;PF14377.7	GO:000484	MF:ubiquitin-protein transferase activity;	nhe;K10592	;HUWE1, MULE, ARF-BP1	map04120	Ubiquitin mediated proteolysis
FVER_09093	RBA14363.1	hypothetical protein FPRO05_03155 [Fusarium proliferatum]	------	------	PF00150.19	GO:0005975;GO:000455	BP:carbohydrate metabolic process;MF:hydrolase activity, hydrolyzing O-glycosyl compounds;	K19355	MAN	map00051	Fructose and mannose metabolism
FVER_09096	RKL41751.1	hypothetical protein BFJ72_g5091 [Fusarium proliferatum]	------	------	PF09423.11	GO:0006364;GO:001602	BP:rRNA processing;CC:integral component of membrane;	K01113	phoD	map00790	Folate biosynthesis
FVER_09203	EGU83564.1	hypothetical protein FOXB_05974 [Fusarium oxysporum Fo5176]	sp|P11353|HEM6_YEAST;	Oxygen-dependent coproporphyrinogen-III oxidase OS=Saccharomyces cerevisiae;	PF01218.19	GO:0006779;GO:0016021;GO:000410	BP:porphyrin-containing compound biosynthetic process;CC:integral component of membrane;MF:coproporphyrinogen oxidase activity;	K00228	CPOX, hemF	map00860	Porphyrin and chlorophyll metabolism
FVER_09210	EGU82876.1	hypothetical protein FOXB_06679 [Fusarium oxysporum Fo5176]	sp|Q12381|PRP1_SCHPO;	Pre-mRNA-splicing factor prp1 OS=Schizosaccharomyces pombe;	------	GO:0045292;GO:0000398;GO:004654	BP:mRNA cis splicing, via spliceosome;BP:mRNA splicing, via spliceosome;CC:U4/U6 x U5 tri-snRNP complex;	K12855	PRPF6, PRP6	map03040	Spliceosome
FVER_09340	RKL21426.1	hypothetical protein BFJ72_g14875 [Fusarium proliferatum]	sp|P87112|NOT1_SCHPO;	General negative regulator of transcription subunit 1 OS=Schizosaccharomyces pombe;	PF04054.16;PF16415.6;PF12842.8;PF16417.6;PF16418.6	GO:0006417;GO:003001	BP:regulation of translation;CC:CCR4-NOT core complex;	K12604	CNOT1, NOT1	map03018	RNA degradation
FVER_09347	KLO94685.1	uncharacterized protein LW93_13504 [Fusarium fujikuroi]	sp|Q54271|PPD_STRHY;	Phosphonopyruvate decarboxylase OS=Streptomyces hygroscopicus OX=1912 GN=bcpC PE=3 SV=2;	PF02776.19;PF02775.22	GO:0003824;GO:003097	MF:catalytic activity;MF:thiamine pyrophosphate binding;	K09459	E4.1.1.82	map00998;map00440	Biosynthesis of various secondary metabolites - part 2;Phosphonate and phosphinate metabolism
FVER_09639	EGU77723.1	hypothetical protein FOXB_11745 [Fusarium oxysporum Fo5176]	sp|O59802|GPI2_SCHPO;	Phosphatidylinositol N-acetylglucosaminyltransferase GPI2 subunit OS=Schizosaccharomyces pombe;	PF06432.12	GO:0006506;GO:0016021;GO:001717	BP:GPI anchor biosynthetic process;CC:integral component of membrane;MF:phosphatidylinositol N-acetylglucosaminyltransferase activity;	K03859	PIGC, GPI2	map00563	Glycosylphosphatidylinositol (GPI)-anchor biosynthesis
FVER_09644	KAF4472125.1	ent-kaurene oxidase [Fusarium albosuccineum]	sp|S0E2Y4|GA1_GIBF5;	Gibberellin cluster GA4 desaturase OS=Gibberella fujikuroi;	PF00067.23	------	------	K21292	CYP503	map00904	Diterpenoid biosynthesis
FVER_09716	RKL43298.1	Catalase-1 [Fusarium proliferatum]	sp|Q9C168|CAT1_NEUCR;	Catalase-1 OS=Neurospora crassa;	PF00199.20;PF06628.13;PF18011.2	GO:0042744;GO:0006979;GO:0046872;GO:0020037;GO:000409	BP:hydrogen peroxide catabolic process;BP:response to oxidative stress;MF:metal ion binding;MF:heme binding;MF:catalase activity;	K03781	katE, CAT, catB, srpA	map04213;map00630;map04011;map00380;map04146	Longevity regulating pathway - multiple species;Glyoxylate and dicarboxylate metabolism;MAPK signaling pathway - yeast;Tryptophan metabolism;Peroxisome
FVER_09811	CVK91440.1	related to 1-phosphatidylinositol 3-kinase [Fusarium mangiferae]	sp|Q9Y7K2|TOR2_SCHPO;	Serine/threonine-protein kinase tor2 OS=Schizosaccharomyces pombe;	PF02259.24;PF00454.28;PF11865.9;PF08771.12;PF02985.23;PF13646.7;PF02260.21;PF13513.7;PF12717.8;PF01602.21	GO:0004674;GO:0044877;GO:000552	MF:protein serine/threonine kinase activity;MF:macromolecular complex binding;MF:ATP binding;	K07203	MTOR, FRAP, TOR	map04136;map04213;map04113;map04138;map04139	Autophagy - other;Longevity regulating pathway - multiple species;Meiosis - yeast;Autophagy - yeast;Mitophagy - yeast
FVER_09843	EXM25890.1	hypothetical protein FOTG_07605 [Fusarium oxysporum f. sp. vasinfectum 25433]	sp|P54117|G3P_COLLN;	Glyceraldehyde-3-phosphate dehydrogenase OS=Colletotrichum lindemuthianum OX=290576 GN=GPDA PE=3 SV=1;	------	------	------	K00134	GAPDH, gapA	map00010	Glycolysis / Gluconeogenesis
FVER_09908	XP_023435736.1	related to YPC1-Alkaline Ceramidase [Fusarium fujikuroi IMI 58289]	sp|Q9D099|ACER3_MOUSE;	Alkaline ceramidase 3 OS=Mus musculus OX=10090 GN=Acer3 PE=1 SV=1;	PF05875.13	GO:0006672;GO:0016021;GO:001681	BP:ceramide metabolic process;CC:integral component of membrane;MF:hydrolase activity, acting on carbon-nitroge;	K04711	ACER3, YDC1	map00600	Sphingolipid metabolism
FVER_10280	RKL23533.1	Sphingosine N-acyltransferase lac1 [Fusarium proliferatum]	sp|W7LKY5|FUM17_GIBM7;	Sphingosine N-acyltransferase-like protein FUM17 OS=Gibberella moniliformis;	PF03798.17;PF08390.12	GO:0016021;GO:001674	CC:integral component of membrane;MF:transferase activity, transferring acyl groups;	K04709	LAG1	map00600	Sphingolipid metabolism
FVER_10307	CVL02588.1	related to 2,4-dienoyl-CoA reductase precursor [Fusarium mangiferae]	sp|Q9BV79|MECR_HUMAN;	Enoyl-[acyl-carrier-protein] reductase, mitochondrial OS=Homo sapiens OX=9606 GN=MECR PE=1 SV=2;	------	GO:001649	MF:oxidoreductase activity;	K07512	MECR, NRBF1	map00061;map00062	Fatty acid biosynthesis;Fatty acid elongation
FVER_10511	CVL11720.1	related to 6-phosphogluconate dehydrogenase [Fusarium proliferatum]	sp|C8VP36|6PGD_EMENI;	6-phosphogluconate dehydrogenase, decarboxylating OS=Emericella nidulans;	PF00393.20;PF03446.16;PF02737.19	GO:0006098;GO:0050661;GO:000461	BP:pentose-phosphate shunt;MF:NADP binding;MF:phosphogluconate dehydrogenas;	K00033	PGD, gnd, gntZ	map00480;map00030	Glutathione metabolism;Pentose phosphate pathway
FVER_10830	CVK97379.1	related to aspartate-tRNA ligase, cytosolic [Fusarium mangiferae]	sp|P04802|SYDC_YEAST;	Aspartate--tRNA ligase, cytoplasmic OS=Saccharomyces cerevisiae;	PF00152.21;PF09924.10;PF01336.26	GO:0006422;GO:0005737;GO:0004815;GO:000552	BP:aspartyl-tRNA aminoacylation;CC:cytoplasm;MF:aspartate-tRNA ligase activity;MF:ATP binding;	K01876	aspS	map00970	Aminoacyl-tRNA biosynthesis
FVER_10832	QGI62778.1	hypothetical protein CEK27_006749 [Fusarium fujikuroi]	sp|Q0DXS3|RDR1_ORYSJ;	Probable RNA-dependent RNA polymerase 1 OS=Oryza sativa subsp. japonica OX=39947 GN=RDR1 PE=2 SV=2;	PF05183.13;PF13087.7;PF13086.7;PF13245.7;PF13604.7;PF05127.15;PF04851.16;PF00580.22;PF00270.30;PF13538.7	GO:000396	MF:RNA-directed RNA polymerase activity;	K14326;pno	UPF1, RENT1;	map03013;map03015	RNA transport;mRNA surveillance pathway
FVER_11006	RKL30421.1	hypothetical protein BFJ72_g11534 [Fusarium proliferatum]	sp|Q89PT3|NITR2_BRADU;	Nitrilase blr3397 OS=Bradyrhizobium diazoefficiens;	PF00795.23	GO:000680	BP:nitrogen compound metabolic process;	K01501	E3.5.5.1	map00460;map00910;map00380	Cyanoamino acid metabolism;Nitrogen metabolism;Tryptophan metabolism
FVER_11128	XP_031089529.1	probable phosphoenolpyruvate synthase [Fusarium proliferatum ET1]	sp|Q55905|PPSA_SYNY3;	Phosphoenolpyruvate synthase OS=Synechocystis sp.;	PF01326.20;PF02896.19	GO:0006090;GO:0008986;GO:000552	BP:pyruvate metabolic process;MF:pyruvate, water dikinase activity;MF:ATP binding;	K01007	pps, ppsA	map00680;map00620	Methane metabolism;Pyruvate metabolism
FVER_11153	KLP05425.1	alpha-mannosidase 1a [Fusarium fujikuroi]	sp|Q9C512|MNS1_ARATH;	Mannosyl-oligosaccharide 1,2-alpha-mannosidase MNS1 OS=Arabidopsis thaliana OX=3702 GN=MNS1 PE=1 SV=1;	PF01532.21	GO:0008152;GO:0016020;GO:0004571;GO:000550	BP:metabolic process;CC:membrane;MF:mannosyl-oligosaccharide 1,2-alpha-mannosidase activity;MF:calcium ion binding;	K01230	MAN1A_C, MNS1_2	map00510;map00513;map04141	N-Glycan biosynthesis;Various types of N-glycan biosynthesis;Protein processing in endoplasmic reticulum
FVER_11296	KLP03410.1	Uncharacterized protein Y057_4694 [Fusarium fujikuroi]	sp|O42873|PDC4_SCHPO;	Putative pyruvate decarboxylase C3G9.11c OS=Schizosaccharomyces pombe;	PF02776.19	GO:0000287;GO:0030976;GO:001683	MF:magnesium ion binding;MF:thiamine pyrophosphate binding;MF:carboxy-lyase activity;	K01568	PDC, pdc	map00010	Glycolysis / Gluconeogenesis
FVER_11442	CVL00907.1	related to regulatory protein RLR1 [Fusarium mangiferae]	sp|Q09779|THO2_SCHPO;	THO complex subunit 2 OS=Schizosaccharomyces pombe;	PF16134.6;PF11262.9;PF11732.9	GO:0006406;GO:0006397;GO:000034	BP:mRNA export from nucleus;BP:mRNA processing;CC:THO complex;	K12879	THOC2	map03013;map03040	RNA transport;Spliceosome
FVER_11476	KLO97258.1	putative phytoene dehydrogenase AL-1 (carotenoid biosynthesis protein al-1) [Fusarium fujikuroi]	sp|P48537|CRTI_CERNC;	Phytoene desaturase OS=Cercospora nicotianae OX=29003 GN=PDH1 PE=3 SV=1;	PF01593.25;PF13450.7;PF01266.25;PF07992.15;PF03486.15;PF00890.25;PF12831.8;PF01134.23;PF01946.18;PF01494.20	GO:0016117;GO:0016021;GO:001649	BP:carotenoid biosynthetic process;CC:integral component of membrane;MF:oxidoreductase activity;	K15745	AL1	map00906	Carotenoid biosynthesis
FVER_11523	XP_023428422.1	related to syntaxin [Fusarium fujikuroi IMI 58289]	sp|O74509|VAM7_SCHPO;	Vacuolar morphogenesis protein 7 homolog OS=Schizosaccharomyces pombe;	PF00787.25	GO:003509	MF:phosphatidylinositol binding;	K08502	VAM7	map04130;map04138	SNARE interactions in vesicular transport;Autophagy - yeast
FVER_11705	PNP82688.1	hypothetical protein FNYG_03919 [Fusarium nygamai]	sp|O43029|FAP1_SCHPO;	L-pipecolate oxidase OS=Schizosaccharomyces pombe;	PF01266.25;PF00890.25;PF07992.15;PF13450.7;PF00899.22	GO:001649	MF:oxidoreductase activity;	K00306	PIPOX	map04146;map00310;map00260	Peroxisome;Lysine degradation;Glycine, serine and threonine metabolism
FVER_11869	XP_023429574.1	probable trehalose-6-phosphate phosphatase [Fusarium fujikuroi IMI 58289]	sp|P31688|TPS2_YEAST;	Trehalose-phosphatase OS=Saccharomyces cerevisiae;	PF00982.22;PF02358.17	GO:0005992;GO:000382	BP:trehalose biosynthetic process;MF:catalytic activity;	K16055	TPS	map00500	Starch and sucrose metabolism
FVER_11951	XP_031076212.1	probable protein kinase PAK1 [Fusarium proliferatum ET1]	sp|P50526|SSP1_SCHPO;	Serine/threonine-protein kinase ssp1 OS=Schizosaccharomyces pombe;	PF00069.26;PF07714.18	GO:0005524;GO:000467	MF:ATP binding;MF:protein kinase activity;	K21157	SAK1	map04138	Autophagy - yeast
FVER_12004	EXL41739.1	alpha-glucosidase [Fusarium oxysporum f. sp. radicis-lycopersici 26381]	sp|B0XNL6|AGDC_ASPFC;	Probable alpha/beta-glucosidase agdC OS=Neosartorya fumigata;	PF01055.27;PF16863.6;PF13802.7	GO:0005975;GO:0030246;GO:000455	BP:carbohydrate metabolic process;MF:carbohydrate binding;MF:hydrolase activity, hydrolyzing O-glycosyl compounds;	K01187	malZ	map00500;map00052	Starch and sucrose metabolism;Galactose metabolism
FVER_12069	CVK85392.1	related to general amidase [Fusarium proliferatum]	sp|P08158|AMDS_EMENI;	Acetamidase OS=Emericella nidulans;	PF01425.22	GO:0006099;GO:0003994;GO:005153	BP:tricarboxylic acid cycle;MF:aconitate hydratase activity;MF:4 iron, 4 sulfur cluster binding;	K01426	E3.5.1.4, amiE	map00360;map00330;map00380	Phenylalanine metabolism;Arginine and proline metabolism;Tryptophan metabolism
FVER_12072	XP_018757422.1	serine palmitoyltransferase [Fusarium verticillioides 7600]	sp|Q09925|LCB2_SCHPO;	Serine palmitoyltransferase 2 OS=Schizosaccharomyces pombe;	PF00155.22	GO:0009058;GO:0016021;GO:0016740;GO:003017	BP:biosynthetic process;CC:integral component of membrane;MF:transferase activity;MF:pyridoxal phosphate binding;	K00654	SPT	map00600;map04138	Sphingolipid metabolism;Autophagy - yeast
FVER_12178	CVL02850.1	probable protein-tyrosine-phosphatase [Fusarium mangiferae]	sp|P27574|PYP1_SCHPO;	Tyrosine-protein phosphatase 1 OS=Schizosaccharomyces pombe;	PF00102.28;PF00581.21	GO:000472	MF:protein tyrosine phosphatase activity;	K19806	PTP2_3	map04011	MAPK signaling pathway - yeast
FVER_12189	PNP60987.1	hypothetical protein FNYG_14268 [Fusarium nygamai]	sp|Q09706|PLD1_SCHPO;	Phospholipase D1 OS=Schizosaccharomyces pombe;	PF13091.7;PF00614.23	GO:0006654;GO:0048017;GO:0016042;GO:0004630;GO:007029	BP:phosphatidic acid biosynthetic process;BP:inositol lipid-mediated signaling;BP:lipid catabolic process;MF:phospholipase D activity;MF:N-acylphosphatidylethanolamine-specific phospholipase D activity;	K01115	PLD1_2	map00565;map00564;map04144	Ether lipid metabolism;Glycerophospholipid metabolism;Endocytosis
FVER_12254	XP_031082204.1	related to linoleate diol synthase [Fusarium proliferatum ET1]	sp|Q4WY82|PPOC_ASPFU;	Linoleate 10R-lipoxygenase OS=Neosartorya fumigata;	PF03098.16;PF00067.23	GO:0006979;GO:0005506;GO:0016705;GO:0004601;GO:002003	BP:response to oxidative stress;MF:iron ion binding;MF:oxidoreductase activity, acting on paired donors, with incorporation or reduction of molecular oxygen;MF:peroxidase activity;MF:heme binding;	K17862	PPOC	map00591	Linoleic acid metabolism
FVER_12303	KAF4418921.1	galactose oxidase [Fusarium acutatum]	sp|P0CS93|GAOA_GIBZA;	Galactose oxidase OS=Gibberella zeae OX=5518 GN=GAOA PE=1 SV=1;	PF09118.12;PF00754.26;PF13964.7;PF01344.26;PF13418.7;PF07250.12	------	------	K04618	GAOA	map00052	Galactose metabolism
FVER_12423	XP_023428377.1	LEU2-Beta-isopropyl-malate dehydrogenase [Fusarium fujikuroi IMI 58289]	sp|P34738|LEU3_NEUCR;	3-isopropylmalate dehydrogenase OS=Neurospora crassa;	------	GO:0009098;GO:0046872;GO:0003862;GO:0051287;GO:000028	BP:leucine biosynthetic process;MF:metal ion binding;MF:3-isopropylmalate dehydrogenase activity;MF:NAD binding;MF:magnesium ion binding;	K00052	leuB, IMDH	map00660;map00290	C5-Branched dibasic acid metabolism;Valine, leucine and isoleucine biosynthesis
FVER_12754	XP_031033885.1	1,4-alpha-glucan-branching enzyme [Fusarium oxysporum NRRL 32931]	sp|Q96VA4|GLGB_ASPOR;	1,4-alpha-glucan-branching enzyme OS=Aspergillus oryzae;	PF02806.19;PF02922.19;PF00128.25	GO:0005978;GO:0043169;GO:0004553;GO:000384	BP:glycogen biosynthetic process;MF:cation binding;MF:hydrolase activity, hydrolyzing O-glycosyl compounds;MF:1,4-alpha-glucan branching enzyme activity;	K00700	GBE1, glgB	map00500	Starch and sucrose metabolism
FVER_12882	RKL49470.1	Inositol hexakisphosphate and diphosphoinositol-pentakisphosphate kinase [Fusarium proliferatum]	sp|O74429|VIP1_SCHPO;	Inositol hexakisphosphate and diphosphoinositol-pentakisphosphate kinase OS=Schizosaccharomyces pombe;	PF00328.23;PF18086.2;PF08443.12	GO:0005737;GO:0005856;GO:0102092;GO:0033857;GO:0000832;GO:0000829;GO:0052723;GO:0052724;GO:000552	CC:cytoplasm;CC:cytoskeleton;MF:5-diphosphoinositol pentakisphosphate 3-kinase activity;MF:diphosphoinositol-pentakisphosphate kinase activity;MF:inositol hexakisphosphate 5-kinase activity;MF:inositol heptakisphosphate kinase activity;MF:inositol hexakisphosphate 1-kinase activity;MF:inositol hexakisphosphate 3-kinase activity;MF:ATP binding;	K13024	PPIP5K, VIP	map04070	Phosphatidylinositol signaling system
FVER_13005	SCO84838.1	related to phospholipase D [Fusarium oxysporum]	sp|P36126|SPO14_YEAST;	Phospholipase D1 OS=Saccharomyces cerevisiae;	PF13091.7;PF00614.23	GO:0006654;GO:0048017;GO:0016042;GO:0004630;GO:007029	BP:phosphatidic acid biosynthetic process;BP:inositol lipid-mediated signaling;BP:lipid catabolic process;MF:phospholipase D activity;MF:N-acylphosphatidylethanolamine-specific phospholipase D activity;	K01115	PLD1_2	map00565;map00564;map04144	Ether lipid metabolism;Glycerophospholipid metabolism;Endocytosis
FVER_13105	XP_031085165.1	probable PDC1-Pyruvate decarboxylase, isozyme 1 [Fusarium proliferatum ET1]	sp|P06169|PDC1_YEAST;	Pyruvate decarboxylase isozyme 1 OS=Saccharomyces cerevisiae;	PF02775.22;PF00205.23	GO:0003824;GO:0030976;GO:0016831;GO:000028	MF:catalytic activity;MF:thiamine pyrophosphate binding;MF:carboxy-lyase activity;MF:magnesium ion binding;	K01568	PDC, pdc	map00010	Glycolysis / Gluconeogenesis
FVER_13171	XP_031043631.1	AGC protein kinase [Fusarium oxysporum NRRL 32931]	sp|P43565|RIM15_YEAST;	Serine/threonine-protein kinase RIM15 OS=Saccharomyces cerevisiae;	PF00069.26;PF07714.18;PF00072.25;PF14531.7;PF01636.24	GO:0000160;GO:0004674;GO:000552	BP:phosphorelay signal transduction system;MF:protein serine/threonine kinase activity;MF:ATP binding;	K12767	RIM15	map04213;map04113;map04138	Longevity regulating pathway - multiple species;Meiosis - yeast;Autophagy - yeast
FVER_13271	CVK86542.1	related to succinate-CoA ligase alpha and beta chain [Fusarium mangiferae]	sp|O13750|SUCA_SCHPO;	Succinate--CoA ligase [ADP-forming] subunit alpha, mitochondrial OS=Schizosaccharomyces pombe;	------	GO:0006099;GO:0005739;GO:0000166;GO:0003824;GO:0048037;GO:0004775;GO:001687	BP:tricarboxylic acid cycle;CC:mitochondrion;MF:nucleotide binding;MF:catalytic activity;MF:cofactor binding;MF:succinate-CoA ligas;MF:ligase activity;	K01899	LSC1	map00020;map00640	Citrate cycle (TCA cycle);Propanoate metabolism
FVER_13314	ABQ11233.1	endo-polygalacturonase [Fusarium sacchari]	sp|Q07181|PGLR_GIBFU;	Polygalacturonase OS=Gibberella fujikuroi OX=5127 GN=PGA PE=1 SV=1;	PF00295.18;PF13229.7	GO:0071555;GO:0005975;GO:0005576;GO:000465	BP:cell wall organization;BP:carbohydrate metabolic process;CC:extracellular region;MF:polygalacturonase activity;	K01184	E3.2.1.15	map00040	Pentose and glucuronate interconversions
FVER_13544	XP_031086833.1	related to acyl-CoA sterol acyltransferase [Fusarium proliferatum ET1]	sp|Q9UU82|AREH2_SCHPO;	Probable sterol O-acyltransferase 2 OS=Schizosaccharomyces pombe;	------	GO:0016021;GO:0005789;GO:000837	CC:integral component of membrane;CC:endoplasmic reticulum membrane;MF:O-acyltransferase activity;	K00637	SOAT	map00100	Steroid biosynthesis
FVER_13631	CVK93755.1	related to mannosyltransferase [Fusarium mangiferae]	sp|Q4I073|GPI14_GIBZE;	GPI mannosyltransferase 1 OS=Gibberella zeae;	PF05007.14;PF06728.14	GO:0006506;GO:0016021;GO:0005789;GO:001675	BP:GPI anchor biosynthetic process;CC:integral component of membrane;CC:endoplasmic reticulum membrane;MF:transferase activity, transferring hexosyl groups;	K05284	PIGM	map00563	Glycosylphosphatidylinositol (GPI)-anchor biosynthesis
FVER_13724	EWZ79717.1	hypothetical protein FOWG_16222 [Fusarium oxysporum f. sp. lycopersici MN25]	sp|W7NCP1|FUB9_GIBM7;	Oxidase FUB9 OS=Gibberella moniliformis;	PF01070.19;PF01645.18;PF00478.26	GO:0016491;GO:001018	MF:oxidoreductase activity;MF:FMN binding;	K11517	HAO	map00630;map04146	Glyoxylate and dicarboxylate metabolism;Peroxisome
FVER_13774	KLO83945.1	null pigmentation protein NpgA [Fusarium fujikuroi]	sp|G5EB87|PPTA_EMENI;	4'-phosphopantetheinyl transferase NpgA OS=Emericella nidulans;	PF01648.21	GO:0008897;GO:000028	MF:holo-[acyl-carrier-protein] synthase activity;MF:magnesium ion binding;	K06133	LYS5, acpT	map00770	Pantothenate and CoA biosynthesis
FVER_14015	CVK95792.1	related to Ribosyldihydronicotinamide dehydrogenase [Fusarium mangiferae]	sp|Q5RBB9|NQO2_PONAB;	Ribosyldihydronicotinamide dehydrogenase [quinone] OS=Pongo abelii OX=9601 GN=NQO2 PE=2 SV=3;	PF02525.18;PF03358.16	------	------	K00355	NQO1	map00130	Ubiquinone and other terpenoid-quinone biosynthesis
FVER_14087	XP_023428165.1	related to SAD1-SnRNP assembly defective [Fusarium fujikuroi IMI 58289]	sp|Q9USR2|UBP10_SCHPO;	Probable mRNA-splicing protein ubp10 OS=Schizosaccharomyces pombe;	PF00443.30;PF02148.20;PF13423.7	GO:0000245;GO:0016579;GO:0036459;GO:000827	BP:spliceosomal complex assembly;BP:protein deubiquitination;MF:thiol-dependent ubiquitinyl hydrolase activity;MF:zinc ion binding;	K12847	USP39, SAD1	map03040	Spliceosome
FVER_14177	CVL08478.1	uncharacterized protein FMAN_05199 [Fusarium mangiferae]	sp|P06617|TR2M_PSESS;	Tryptophan 2-monooxygenase OS=Pseudomonas savastanoi OX=29438 GN=iaaM PE=1 SV=1;	PF01593.25;PF13450.7;PF07992.15	GO:0004497;GO:001649	MF:monooxygenase activity;MF:oxidoreductase activity;	K00466	iaaM	map00380	Tryptophan metabolism
FVER_14277	KLO81669.1	Uncharacterized protein LW93_6821 [Fusarium fujikuroi]	sp|Q873E8|GSHR_NEUCR;	Glutathione reductase OS=Neurospora crassa;	PF07992.15;PF02852.23;PF00070.28;PF13738.7;PF12831.8;PF01266.25	GO:0006749;GO:0045454;GO:0005737;GO:0005623;GO:0050661;GO:0050660;GO:000436	BP:glutathione metabolic process;BP:cell redox homeostasis;CC:cytoplasm;CC:cell;MF:NADP binding;MF:flavin adenine dinucleotide binding;MF:glutathione-disulfide reductase activity;	K00383	GSR, gor	map00480	Glutathione metabolism
FVER_14316	XP_031085318.1	probable endopolygalacturonase [Fusarium proliferatum ET1]	sp|A1D145|PGLR_NEOFI;	Probable endopolygalacturonase NFIA_008150 OS=Neosartorya fischeri;	PF00295.18	GO:0071555;GO:0005975;GO:0005576;GO:000465	BP:cell wall organization;BP:carbohydrate metabolic process;CC:extracellular region;MF:polygalacturonase activity;	K01184	E3.2.1.15	map00040	Pentose and glucuronate interconversions
FVER_14380	RBA12428.1	1-phosphatidylinositol-3-phosphate 5-kinase [Fusarium proliferatum]	sp|P34756|FAB1_YEAST;	1-phosphatidylinositol 3-phosphate 5-kinase FAB1 OS=Saccharomyces cerevisiae;	PF01504.19;PF00118.25;PF01363.22	GO:0046872;GO:0016307;GO:000552	MF:metal ion binding;MF:phosphatidylinositol phosphate kinase activity;MF:ATP binding;	K00921	PIKFYVE, FAB1	map04145;map04070;map00562	Phagosome;Phosphatidylinositol signaling system;Inositol phosphate metabolism
FVER_14394	RBQ83450.1	hypothetical protein FVER53263_05592 [Fusarium verticillioides]	sp|O74770|PHK_SCHPO;	Probable phosphoketolase OS=Schizosaccharomyces pombe;	PF09364.11;PF09363.11;PF03894.16	GO:0005975;GO:001683	BP:carbohydrate metabolic process;MF:aldehyde-lyase activity;	K01621	xfp, xpk	map00030	Pentose phosphate pathway
FVER_14515	CVL08071.1	related to midasin (AAA ATPase) [Fusarium proliferatum]	sp|Q12019|MDN1_YEAST;	Midasin OS=Saccharomyces cerevisiae;	PF07728.15;PF17867.2;PF17865.2;PF07726.12;PF00004.30;PF12775.8;PF13191.7;PF13401.7;PF02367.18;PF14532.7	GO:0000027;GO:0005634;GO:0016887;GO:000552	BP:ribosomal large subunit assembly;CC:nucleus;MF:ATPase activity;MF:ATP binding;	K14572	MDN1, REA1	map03008	Ribosome biogenesis in eukaryotes
FVER_14519	EXL70659.1	cytochrome P450 55A1 [Fusarium oxysporum f. sp. conglutinans race 2 54008]	sp|P23295|NOR_FUSOX;	NADP nitrous oxide-forming nitric oxide reductase OS=Fusarium oxysporum OX=5507 GN=CYP55A1 PE=1 SV=2;	PF00067.23	GO:0005506;GO:0016705;GO:0004497;GO:002003	MF:iron ion binding;MF:oxidoreductase activity, acting on paired donors, with incorporation or reduction of molecular oxygen;MF:monooxygenase activity;MF:heme binding;	K15877	CYP55	map00910	Nitrogen metabolism
FVER_14560	CVK98155.1	related to lincomycin-condensing protein lmbA [Fusarium mangiferae]	------	------	PF06140.14;PF14357.7	------	------	K00681	ggt	map00460;map00480;map00430	Cyanoamino acid metabolism;Glutathione metabolism;Taurine and hypotaurine metabolism
FVER_00372	CVK82983.1	probable crooked neck protein CGI-201 (short form) [Fusarium mangiferae]	sp|Q7SGD2|CLF1_NEUCR;	Pre-mRNA-splicing factor clf-1 OS=Neurospora crassa;	PF13428.7;PF02184.17;PF05843.15;PF14559.7;PF13431.7;PF08640.12	GO:0006270;GO:0000354;GO:0006396;GO:0071008;GO:0000974;GO:0071006;GO:0071007;GO:0071004;GO:0000785;GO:0003688;GO:000368	BP:DNA replication initiation;BP:cis assembly of pre-catalytic spliceosome;BP:RNA processing;CC:U2-type post-mRNA release spliceosomal complex;CC:Prp19 complex;CC:U2-type catalytic step 1 spliceosome;CC:U2-type catalytic step 2 spliceosome;CC:U2-type prespliceosome;CC:chromatin;MF:DNA replication origin binding;MF:chromatin binding;	K12869	CRN, CRNKL1, CLF1, SYF3	map03040	Spliceosome
FVER_00391	XP_023430838.1	related to transthyretin-like protein pucM [Fusarium fujikuroi IMI 58289]	sp|O74492|HIUH_SCHPO;	Probable 5-hydroxyisourate hydrolase OS=Schizosaccharomyces pombe;	PF00576.22	GO:0006144;GO:003397	BP:purine nucleobase metabolic process;MF:hydroxyisourate hydrolase activity;	K07127	uraH, pucM, hiuH	map00230	Purine metabolism
FVER_00531	RBQ89629.1	hypothetical protein FVER53263_05425 [Fusarium verticillioides]	sp|O12947|ICMT_XENLA;	Protein-S-isoprenylcysteine O-methyltransferase OS=Xenopus laevis OX=8355 GN=icmt PE=2 SV=1;	PF04140.15;PF04191.14;PF06966.13	GO:0016021;GO:0005789;GO:000467	CC:integral component of membrane;CC:endoplasmic reticulum membrane;MF:protein C-terminal S-isoprenylcysteine carboxyl O-methyltransferase activity;	K00587	ICMT, STE14	map00900	Terpenoid backbone biosynthesis
FVER_01027	KLO81893.1	long-chain-fatty-acid--CoA ligase [Fusarium fujikuroi]	sp|W7L9F0|FUM16_GIBM7;	Acyl-CoA synthetase FUM16 OS=Gibberella moniliformis;	PF00501.29	GO:0003824;GO:001687	MF:catalytic activity;MF:ligase activity;	K01897	ACSL, fadD	map04146;map00061;map00071	Peroxisome;Fatty acid biosynthesis;Fatty acid degradation
FVER_01348	EXM21606.1	hypothetical protein FOTG_10543 [Fusarium oxysporum f. sp. vasinfectum 25433]	sp|B8NM74|USTQ_ASPFN;	Tyrosinase ustQ OS=Aspergillus flavus;	PF00264.21	GO:0016021;GO:0004497;GO:0046872;GO:001649	CC:integral component of membrane;MF:monooxygenase activity;MF:metal ion binding;MF:oxidoreductase activity;	K00505	TYR	map00350	Tyrosine metabolism
FVER_01361	XP_018759794.1	hypothetical protein FVEG_12000 [Fusarium verticillioides 7600]	sp|P08843|ADH1_EMENI;	Alcohol dehydrogenase 1 OS=Emericella nidulans;	PF00107.27;PF08240.13;PF13602.7	------	------	K13953	adhP	map00010;map00071;map00350	Glycolysis / Gluconeogenesis;Fatty acid degradation;Tyrosine metabolism
FVER_01736	QGI87482.1	hypothetical protein CEK25_002438 [Fusarium fujikuroi]	sp|O59805|YJV7_SCHPO;	Putative amidase C550.07 OS=Schizosaccharomyces pombe;	PF01425.22	------	------	K01426	E3.5.1.4, amiE	map00360;map00330;map00380	Phenylalanine metabolism;Arginine and proline metabolism;Tryptophan metabolism
FVER_01803	RBA15225.1	6-phosphogluconate dehydrogenase, decarboxylating 1 [Fusarium proliferatum]	sp|P38720|6PGD1_YEAST;	6-phosphogluconate dehydrogenase, decarboxylating 1 OS=Saccharomyces cerevisiae;	PF00393.20;PF03446.16	GO:0006098;GO:0019521;GO:0050661;GO:000461	BP:pentose-phosphate shunt;BP:D-gluconate metabolic process;MF:NADP binding;MF:phosphogluconate dehydrogenas;	K00033	PGD, gnd, gntZ	map00480;map00030	Glutathione metabolism;Pentose phosphate pathway
FVER_02255	RKL41699.1	hypothetical protein BFJ72_g5591 [Fusarium proliferatum]	sp|Q8LPN3|ADCS_ARATH;	Aminodeoxychorismate synthase, chloroplastic OS=Arabidopsis thaliana OX=3702 GN=ADCS PE=1 SV=1;	PF00425.19;PF00117.29;PF04715.14;PF07722.14	GO:0009058;GO:000654	BP:biosynthetic process;BP:glutamine metabolic process;	K13950	pabAB	map00790	Folate biosynthesis
FVER_02565	KAF4494492.1	pyruvate kinase [Fusarium agapanthi]	sp|P31865|KPYK_HYPJE;	Pyruvate kinase OS=Hypocrea jecorina OX=51453 GN=pki1 PE=3 SV=1;	PF00224.22;PF02887.17;PF03328.15	GO:0042866;GO:0061621;GO:0030955;GO:0016301;GO:0000287;GO:000474	BP:pyruvate biosynthetic process;BP:canonical glycolysis;MF:potassium ion binding;MF:kinase activity;MF:magnesium ion binding;MF:pyruvate kinase activity;	K00873	PK, pyk	map00010;map00230;map00620	Glycolysis / Gluconeogenesis;Purine metabolism;Pyruvate metabolism
FVER_02703	CVL06465.1	probable homoserine O-acetyltransferase [Fusarium mangiferae]	sp|W7N293|FUB5_GIBM7;	Homoserine O-acetyltransferase FUB5 OS=Gibberella moniliformis;	PF00561.21;PF12697.8	GO:0009058;GO:0004414;GO:001674	BP:biosynthetic process;MF:homoserine O-acetyltransferase activity;MF:transferase activity, transferring acyl groups other than amino-acyl groups;	K00641	metX	map00270;map00920	Cysteine and methionine metabolism;Sulfur metabolism
FVER_03160	QGI62814.1	hypothetical protein CEK27_006785 [Fusarium fujikuroi]	sp|P08456|PSS_YEAST;	CDP-diacylglycerol--serine O-phosphatidyltransferase OS=Saccharomyces cerevisiae;	PF01066.22;PF01467.27	GO:0009058;GO:0008654;GO:0016021;GO:0003824;GO:001678	BP:biosynthetic process;BP:phospholipid biosynthetic process;CC:integral component of membrane;MF:catalytic activity;MF:phosphotransferase activity, for other substituted phosphate groups;	K17103	CHO1, pssA	map00564;map00260	Glycerophospholipid metabolism;Glycine, serine and threonine metabolism
FVER_03639	RKK71743.1	Glucokinase [Fusarium oxysporum]	sp|Q92407|HXKG_ASPNG;	Glucokinase OS=Aspergillus niger OX=5061 GN=glkA PE=1 SV=1;	PF03727.17;PF00349.22	GO:0001678;GO:0006096;GO:0016021;GO:0005623;GO:0004396;GO:0005524;GO:000553	BP:cellular glucose homeostasis;BP:glycolytic process;CC:integral component of membrane;CC:cell;MF:hexokinase activity;MF:ATP binding;MF:glucose binding;	K00844	HK	map00520;map00051;map00524;map00052;map00010;map00500	Amino sugar and nucleotide sugar metabolism;Fructose and mannose metabolism;Neomycin, kanamycin and gentamicin biosynthesis;Galactose metabolism;Glycolysis / Gluconeogenesis;Starch and sucrose metabolism
FVER_04323	XP_023427205.1	probable xylitol dehydrogenase [Fusarium fujikuroi IMI 58289]	sp|A1CFY8|XYL2_ASPCL;	Probable D-xylulose reductase A OS=Aspergillus clavatus;	PF08240.13;PF00107.27;PF16912.6;PF13602.7;PF01262.22	GO:0008270;GO:001649	MF:zinc ion binding;MF:oxidoreductase activity;	K05351	E1.1.1.9	map00040	Pentose and glucuronate interconversions
FVER_04343	SCO31331.1	probable homoserine O-acetyltransferase [Fusarium fujikuroi]	sp|S0DUX2|FUB5_GIBF5;	Homoserine O-acetyltransferase FUB5 OS=Gibberella fujikuroi;	PF00561.21;PF12697.8;PF12146.9	GO:0009058;GO:001674	BP:biosynthetic process;MF:transferase activity, transferring acyl groups other than amino-acyl groups;	K00641	metX	map00270;map00920	Cysteine and methionine metabolism;Sulfur metabolism
FVER_04767	KLP10336.1	putative beta-glucosidase precursor [Fusarium fujikuroi]	sp|A1D122|BGLM_NEOFI;	Probable beta-glucosidase M OS=Neosartorya fischeri;	PF01915.23;PF00933.22;PF14310.7	GO:0030245;GO:0102483;GO:000842	BP:cellulose catabolic process;MF:scopolin beta-glucosidase activity;MF:beta-glucosidase activity;	K05349	bglX	map00460;map00500	Cyanoamino acid metabolism;Starch and sucrose metabolism
FVER_04901	QGI61651.1	hypothetical protein CEK27_005622 [Fusarium fujikuroi]	sp|Q8BH95|ECHM_MOUSE;	Enoyl-CoA hydratase, mitochondrial OS=Mus musculus OX=10090 GN=Echs1 PE=1 SV=1;	PF00378.21;PF16113.6	GO:000382	MF:catalytic activity;	K07511	ECHS1	map00310;map00640;map00062;map00650;map00380;map00071;map00280;map00410	Lysine degradation;Propanoate metabolism;Fatty acid elongation;Butanoate metabolism;Tryptophan metabolism;Fatty acid degradation;Valine, leucine and isoleucine degradation;beta-Alanine metabolism
FVER_05969	XP_023425315.1	related to D-alanine aminotransferase [Fusarium fujikuroi IMI 58289]	sp|Q9ASR4|BCAL2_ARATH;	Branched-chain-amino-acid aminotransferase-like protein 2 OS=Arabidopsis thaliana OX=3702 GN=At5g27410 PE=2 SV=1;	PF01063.20	GO:0003824;GO:000848	MF:catalytic activity;MF:transaminase activity;	K00826	E2.6.1.42, ilvE	map00270;map00770;map00280;map00290	Cysteine and methionine metabolism;Pantothenate and CoA biosynthesis;Valine, leucine and isoleucine degradation;Valine, leucine and isoleucine biosynthesis
FVER_06302	XP_023437712.1	probable low-affinity hexose transporter HXT3 [Fusarium fujikuroi IMI 58289]	sp|P23585|HXT2_YEAST;	High-affinity glucose transporter HXT2 OS=Saccharomyces cerevisiae;	PF00083.25;PF07690.17	GO:0016021;GO:002285	CC:integral component of membrane;MF:transmembrane transporter activity;	K08139	HXT	map04113	Meiosis - yeast
FVER_06491	EGU89257.1	hypothetical protein FOXB_00210 [Fusarium oxysporum Fo5176]	sp|P48826|G6PD_ASPNG;	Glucose-6-phosphate 1-dehydrogenase OS=Aspergillus niger OX=5061 GN=gsdA PE=2 SV=1;	PF02781.17;PF00479.23	GO:0006357;GO:0006098;GO:0006006;GO:0016592;GO:0050661;GO:0004345;GO:000371	BP:regulation of transcription from RNA polymerase II promoter;BP:pentose-phosphate shunt;BP:glucose metabolic process;CC:mediator complex;MF:NADP binding;MF:glucose-6-phosphate dehydrogenase activity;MF:transcription cofactor activity;	K00036	G6PD, zwf	map00480;map00030	Glutathione metabolism;Pentose phosphate pathway
FVER_07007	RKL29231.1	Neutral ceramidase [Fusarium proliferatum]	sp|Q304B9|NCER2_ARATH;	Neutral ceramidase 2 OS=Arabidopsis thaliana OX=3702 GN=NCER2 PE=3 SV=1;	PF04734.14;PF17048.6	GO:0046514;GO:0102121;GO:001704	BP:ceramide catabolic process;MF:ceramidase activity;MF:ceramidase activity;	K12349	ASAH2	map00600	Sphingolipid metabolism
FVER_07048	EXK85146.1	O-acetylhomoserine (thiol)-lyase [Fusarium oxysporum f. sp. raphani 54005]	sp|S0DUX5|FUB7_GIBF5;	Sulfhydrylase FUB7 OS=Gibberella fujikuroi;	PF01053.21;PF00155.22;PF00266.20;PF01041.18;PF01212.22	GO:0019346;GO:0016765;GO:0016829;GO:003017	BP:transsulfuration;MF:transferase activity, transferring alkyl or ary;MF:lyase activity;MF:pyridoxal phosphate binding;	K17069	MET17	map00270;map00920	Cysteine and methionine metabolism;Sulfur metabolism
FVER_07277	XP_031078765.1	related to SUC2-invertase (sucrose hydrolyzing enzyme) [Fusarium proliferatum ET1]	sp|P00724|INV2_YEAST;	Invertase 2 OS=Saccharomyces cerevisiae;	PF00251.21;PF08244.13	GO:0005975;GO:000455	BP:carbohydrate metabolic process;MF:hydrolase activity, hydrolyzing O-glycosyl compounds;	K01193	INV, sacA	map00500;map00052	Starch and sucrose metabolism;Galactose metabolism
FVER_08439	EGU83321.1	hypothetical protein FOXB_06172 [Fusarium oxysporum Fo5176]	sp|P40433|6P21_YEAST;	6-phosphofructo-2-kinase 1 OS=Saccharomyces cerevisiae;	PF01591.19;PF00300.23	GO:0006000;GO:0006003;GO:0003873;GO:000552	BP:fructose metabolic process;BP:fructose 2,6-bisphosphate metabolic process;MF:6-phosphofructo-2-kinase activity;MF:ATP binding;	K00900	E2.7.1.105, PFK	map00051	Fructose and mannose metabolism
FVER_08601	XP_018237612.1	mitochondrial 2-oxoglutarate/malate carrier protein [Fusarium oxysporum f. sp. lycopersici 4287]	sp|P0C582|M2OM_NEUCR;	Putative mitochondrial 2-oxoglutarate/malate carrier protein OS=Neurospora crassa;	PF00153.28	GO:0016021;GO:000534	CC:integral component of membrane;MF:ATP transmembrane transporter activity;	K15104;K10838	SLC25A11, OGC;XPC	map03420	Nucleotide excision repair
FVER_09613	CVK87600.1	related to endocytosis ankyrin repeat protein Nuc-2 [Fusarium mangiferae]	sp|Q01317|NUC2_NEUCR;	Ankyrin repeat protein nuc-2 OS=Neurospora crassa;	PF12796.8;PF13637.7;PF13606.7;PF13857.7;PF00023.31	------	------	K20995;K15502;K06653	NOTCH3;ANKRD28;PHO81	map04111	Cell cycle - yeast
FVER_09648	XP_018251224.1	alcohol dehydrogenase 1 [Fusarium oxysporum f. sp. lycopersici 4287]	sp|Q9P6C8|ADH1_NEUCR;	Alcohol dehydrogenase 1 OS=Neurospora crassa;	PF08240.13;PF00107.27;PF13602.7	GO:0008270;GO:001649	MF:zinc ion binding;MF:oxidoreductase activity;	K13953	adhP	map00010;map00071;map00350	Glycolysis / Gluconeogenesis;Fatty acid degradation;Tyrosine metabolism
FVER_09719	RKL26229.1	Mannosyl-oligosaccharide alpha-1,2-mannosidase [Fusarium proliferatum]	sp|P31723|MAN12_PENCI;	Mannosyl-oligosaccharide alpha-1,2-mannosidase OS=Penicillium citrinum OX=5077 GN=MSDC PE=1 SV=2;	PF01532.21	GO:0008152;GO:0016020;GO:0004571;GO:000550	BP:metabolic process;CC:membrane;MF:mannosyl-oligosaccharide 1,2-alpha-mannosidase activity;MF:calcium ion binding;	K01230	MAN1A_C, MNS1_2	map00510;map00513;map04141	N-Glycan biosynthesis;Various types of N-glycan biosynthesis;Protein processing in endoplasmic reticulum
FVER_10290	SCV36299.1	related to pyridoxamine 5`-phosphate oxidase [Fusarium fujikuroi]	sp|Q89RY8|PDXH_BRADU;	Pyridoxine/pyridoxamine 5'-phosphate oxidase OS=Bradyrhizobium diazoefficiens;	PF01243.21;PF10590.10;PF12766.8	GO:0008615;GO:0004733;GO:001018	BP:pyridoxine biosynthetic process;MF:pyridoxamine-phosphate oxidase activity;MF:FMN binding;	K00275	pdxH, PNPO	map00750	Vitamin B6 metabolism
FVER_10869	XP_031071424.1	uncharacterized protein FOIG_02195 [Fusarium oxysporum f. sp. cubense tropical race 4 54006]	sp|Q6AX45|VPS25_XENLA;	Vacuolar protein-sorting-associated protein 25 OS=Xenopus laevis OX=8355 GN=vps25 PE=2 SV=1;	PF05871.13	GO:0071985;GO:000081	BP:multivesicular body sorting pathway;CC:ESCRT II complex;	K12189	VPS25, EAP20	map04144	Endocytosis
FVER_11560	RKL40482.1	Endochitinase B1 [Fusarium proliferatum]	sp|Q873X9|CHIB1_ASPFM;	Endochitinase B1 OS=Neosartorya fumigata OX=746128 GN=chiB1 PE=1 SV=1;	PF00704.29	GO:0005975;GO:0008061;GO:000455	BP:carbohydrate metabolic process;MF:chitin binding;MF:hydrolase activity, hydrolyzing O-glycosyl compounds;	K01183	E3.2.1.14	map00520	Amino sugar and nucleotide sugar metabolism
FVER_12156	XP_023428558.1	probable extragenic suppressor of the bimD6 mutation [Fusarium fujikuroi IMI 58289]	sp|G0S3J5|RIO1_CHATD;	Serine/threonine-protein kinase RIO1 OS=Chaetomium thermophilum;	PF01163.23	GO:0004674;GO:000552	MF:protein serine/threonine kinase activity;MF:ATP binding;	K07178	RIOK1	map03008	Ribosome biogenesis in eukaryotes
FVER_12328	RBR03585.1	hypothetical protein FVER53590_04007 [Fusarium verticillioides]	sp|Q4W9B8|PFKA_ASPFU;	ATP-dependent 6-phosphofructokinase OS=Neosartorya fumigata;	PF00365.21	GO:0006002;GO:0005737;GO:0003872;GO:0046872;GO:000552	BP:fructose 6-phosphate metabolic process;CC:cytoplasm;MF:6-phosphofructokinase activity;MF:metal ion binding;MF:ATP binding;	K00850	pfkA, PFK	map00051;map00052;map00680;map00010;map03018;map00030	Fructose and mannose metabolism;Galactose metabolism;Methane metabolism;Glycolysis / Gluconeogenesis;RNA degradation;Pentose phosphate pathway
FVER_12426	XP_023434311.1	probable ubiquitin--protein ligase [Fusarium fujikuroi IMI 58289]	sp|O74810|UBC1_SCHPO;	Ubiquitin-conjugating enzyme E2 1 OS=Schizosaccharomyces pombe;	PF00179.27;PF09288.11;PF14461.7	GO:0016740;GO:000552	MF:transferase activity;MF:ATP binding;	K04649	HIP2, UBC1	map04120	Ubiquitin mediated proteolysis
FVER_13354	XP_023429951.1	probable catalase isozyme P [Fusarium fujikuroi IMI 58289]	sp|O13289|CATA_CANAL;	Peroxisomal catalase OS=Candida albicans;	PF00199.20;PF06628.13	GO:0042744;GO:0006979;GO:0046872;GO:0020037;GO:000409	BP:hydrogen peroxide catabolic process;BP:response to oxidative stress;MF:metal ion binding;MF:heme binding;MF:catalase activity;	K03781	katE, CAT, catB, srpA	map04213;map00630;map04011;map00380;map04146	Longevity regulating pathway - multiple species;Glyoxylate and dicarboxylate metabolism;MAPK signaling pathway - yeast;Tryptophan metabolism;Peroxisome
FVER_13904	XP_023429500.1	probable pyruvate decarboxylase [Fusarium fujikuroi IMI 58289]	sp|Q2UKV4|PDC_ASPOR;	Pyruvate decarboxylase OS=Aspergillus oryzae;	PF02776.19;PF00205.23;PF02775.22	GO:0000287;GO:0016831;GO:003097	MF:magnesium ion binding;MF:carboxy-lyase activity;MF:thiamine pyrophosphate binding;	K01568	PDC, pdc	map00010	Glycolysis / Gluconeogenesis
FVER_14649	KLO85179.1	Uncharacterized protein Y057_10731 [Fusarium fujikuroi]	sp|Q5AX28|AGALD_EMENI;	Alpha-galactosidase D OS=Emericella nidulans;	PF16499.6;PF17801.2	GO:0005975;GO:0016021;GO:0052692;GO:003024	BP:carbohydrate metabolic process;CC:integral component of membrane;MF:raffinose alpha-galactosidase activity;MF:carbohydrate binding;	K07407	E3.2.1.22B, galA, rafA	map00600;map00603;map00561;map00052	Sphingolipid metabolism;Glycosphingolipid biosynthesis - globo and isoglobo series;Glycerolipid metabolism;Galactose metabolism
DEGs of Cluster Ⅵ
Gene ID	NR_hit-name	NR_description	Swiss-Prot_hit-name	Swiss-Prot_description	Pfam_id	GO_id	GO_term	KO_id	KO_name	Pathway_id	Pathway_definition
FVER_00127	XP_018245558.1	1-aminocyclopropane-1-carboxylate deaminase [Fusarium oxysporum f. sp. lycopersici 4287]	sp|Q5KMX3|1A1D_CRYNJ;	Probable 1-aminocyclopropane-1-carboxylate deaminase OS=Cryptococcus neoformans var. neoformans serotype D;	PF00291.26	GO:0009310;GO:0008660;GO:003017	BP:amine catabolic process;MF:1-aminocyclopropane-1-carboxylate deaminase activity;MF:pyridoxal phosphate binding;	K01505	E3.5.99.7	map00270	Cysteine and methionine metabolism
FVER_00134	XP_018745502.1	propionyl-CoA carboxylase beta chain [Fusarium verticillioides 7600]	sp|Q3ULD5|MCCB_MOUSE;	Methylcrotonoyl-CoA carboxylase beta chain, mitochondrial OS=Mus musculus OX=10090 GN=Mccc2 PE=1 SV=1;	PF01039.23	GO:001687	MF:ligase activity;	K01969	E6.4.1.4B	map00280	Valine, leucine and isoleucine degradation
FVER_00181	EGU82861.1	hypothetical protein FOXB_06664 [Fusarium oxysporum Fo5176]	sp|O43012|DCTD_SCHPO;	Deoxycytidylate deaminase OS=Schizosaccharomyces pombe;	PF00383.24;PF14437.7;PF13238.7	GO:0006914;GO:0005737;GO:0016787;GO:0008270;GO:000864	BP:autophagy;CC:cytoplasm;MF:hydrolase activity;MF:zinc ion binding;MF:small protein activating enzyme activity;	K01493	comEB	map00240	Pyrimidine metabolism
FVER_00212	CVK89540.1	probable hydroxyacylglutathione hydrolase [Fusarium mangiferae]	sp|O42936|LAS1_SCHPO;	Pre-rRNA-processing protein las1 OS=Schizosaccharomyces pombe;	PF04031.14	GO:0006364;GO:0090730;GO:000451	BP:rRNA processing;CC:Las1 complex;MF:endonuclease activity;	K01069;K16912	gloB, gloC, HAGH;LAS1	map00620	Pyruvate metabolism
FVER_00272	CVK99942.1	probable aspartate aminotransferase, cytoplasmic [Fusarium mangiferae]	sp|P13221|AATC_RAT;	Aspartate aminotransferase, cytoplasmic OS=Rattus norvegicus OX=10116 GN=Got1 PE=1 SV=3;	PF00155.22	GO:0009058;GO:0006520;GO:0004069;GO:003017	BP:biosynthetic process;BP:cellular amino acid metabolic process;MF:L-aspartat;MF:pyridoxal phosphate binding;	K14454	GOT1	map00220;map00270;map00330;map00250;map00360;map00350;map00400	Arginine biosynthesis;Cysteine and methionine metabolism;Arginine and proline metabolism;Alanine, aspartate and glutamate metabolism;Phenylalanine metabolism;Tyrosine metabolism;Phenylalanine, tyrosine and tryptophan biosynthesis
FVER_00337	XP_018246754.1	eukaryotic translation initiation factor 6 [Fusarium oxysporum f. sp. lycopersici 4287]	sp|C9SV08|IF6_VERA1;	Eukaryotic translation initiation factor 6 OS=Verticillium alfalfae;	PF01912.19	GO:0042273;GO:0016192;GO:0000054;GO:0042256;GO:1902626;GO:0000463;GO:0000466;GO:0005737;GO:0005730;GO:0030687;GO:0016279;GO:0043023;GO:0043022;GO:000374	BP:ribosomal large subunit biogenesis;BP:vesicle-mediated transport;BP:ribosomal subunit export from nucleus;BP:mature ribosome assembly;BP:assembly of large subunit precursor of preribosome;BP:maturation of LSU-rRNA from tricistronic rRNA transcrip;BP:maturation of 5.8S rRNA from tricistronic rRNA transcrip;CC:cytoplasm;CC:nucleolus;CC:preribosome, large subunit precursor;MF:protein-lysine N-met…	K03264	EIF6	map03008	Ribosome biogenesis in eukaryotes
FVER_00338	XP_018249764.1	DnaJ like subfamily A member 2 [Fusarium oxysporum f. sp. lycopersici 4287]	sp|O94657|XDJ1_SCHPO;	DnaJ protein homolog xdj1 OS=Schizosaccharomyces pombe;	PF01556.19;PF00226.32;PF00684.20	GO:0006457;GO:0009408;GO:0031072;GO:0051082;GO:0046872;GO:000552	BP:protein folding;BP:response to heat;MF:heat shock protein binding;MF:unfolded protein binding;MF:metal ion binding;MF:ATP binding;	K09503	DNAJA2	map04141	Protein processing in endoplasmic reticulum
FVER_00458	QGI68784.1	hypothetical protein CEK27_012755 [Fusarium fujikuroi]	sp|Q0CCY0|GEDE_ASPTN;	Glutathione S-transferase-like protein gedE OS=Aspergillus terreus;	PF13417.7;PF13409.7;PF02798.21;PF13410.7;PF00043.26;PF14497.7	GO:001674	MF:transferase activity;	K00799	GST, gst	map00480	Glutathione metabolism
FVER_00477	XP_023426354.1	related to DFG5 protein [Fusarium fujikuroi IMI 58289]	sp|P36605|HIS8_SCHPO;	Histidinol-phosphate aminotransferase OS=Schizosaccharomyces pombe;	PF03663.15	GO:0016052;GO:000849	BP:carbohydrate catabolic process;MF:mannan endo-1,6-alpha-mannosidase activity;	K08257;K00817	E3.2.1.101;hisC	map00340;map00400;map00360;map00350	Histidine metabolism;Phenylalanine, tyrosine and tryptophan biosynthesis;Phenylalanine metabolism;Tyrosine metabolism
FVER_00610	RKL43067.1	Glucosamine-6-phosphate deaminase [Fusarium proliferatum]	sp|A0KIG3|NAGB_AERHH;	Glucosamine-6-phosphate deaminase OS=Aeromonas hydrophila subsp. hydrophila;	PF01182.21	GO:0006044;GO:0005975;GO:000434	BP:N-acetylglucosamine metabolic process;BP:carbohydrate metabolic process;MF:glucosamine-6-phosphate deaminase activity;	K02564	nagB, GNPDA	map00520	Amino sugar and nucleotide sugar metabolism
FVER_00621	EGU81367.1	hypothetical protein FOXB_08096 [Fusarium oxysporum Fo5176]	sp|P50136|ODBA_MOUSE;	2-oxoisovalerate dehydrogenase subunit alpha, mitochondrial OS=Mus musculus OX=10090 GN=Bckdha PE=1 SV=1;	PF00676.21;PF02775.22	GO:0009083;GO:0003863;GO:000382	BP:branched-chain amino acid catabolic process;MF:3-methyl-2-oxobutanoate dehydrogenas;MF:alpha-ketoacid dehydrogenase activity;	K00166	BCKDHA, bkdA1	map00280;map00640	Valine, leucine and isoleucine degradation;Propanoate metabolism
FVER_00664	CVL02918.1	probable acetylornithine aminotransferase precursor [Fusarium mangiferae]	sp|Q9P3I3|ARGD_NEUCR;	Acetylornithine aminotransferase, mitochondrial OS=Neurospora crassa;	PF00202.22;PF00155.22	GO:0006525;GO:0008483;GO:003017	BP:arginine metabolic process;MF:transaminase activity;MF:pyridoxal phosphate binding;	K00818	E2.6.1.11, argD	map00220	Arginine biosynthesis
FVER_00681	EXL69273.1	hypothetical protein FOPG_14729 [Fusarium oxysporum f. sp. conglutinans race 2 54008]	sp|O59805|YJV7_SCHPO;	Putative amidase C550.07 OS=Schizosaccharomyces pombe;	PF01425.22	------	------	K01426	E3.5.1.4, amiE	map00360;map00330;map00380	Phenylalanine metabolism;Arginine and proline metabolism;Tryptophan metabolism
FVER_00697	XP_023432222.1	probable PAB1-mRNA polyadenylate-binding protein [Fusarium fujikuroi IMI 58289]	sp|Q7S6N6|PABP_NEUCR;	Polyadenylate-binding protein, cytoplasmic and nuclear OS=Neurospora crassa;	PF00076.23;PF00658.19;PF13893.7;PF16842.6	GO:0060212;GO:1901919;GO:1901918;GO:0005737;GO:0010494;GO:0071014;GO:0008143;GO:000372	BP:negative regulation of nuclear-transcribed mRNA pol;BP:positive regulation of exoribonuclease activity;BP:negative regulation of exoribonuclease activity;CC:cytoplasm;CC:cytoplasmic stress granule;CC:post-mRNA release spliceosomal complex;MF:pol;MF:RNA binding;	K13126	PABPC	map03018;map03013;map03015	RNA degradation;RNA transport;mRNA surveillance pathway
FVER_00723	XP_018749725.1	serine hydroxymethyltransferase, cytosolic [Fusarium verticillioides 7600]	sp|P34898|GLYC_NEUCR;	Serine hydroxymethyltransferase, cytosolic OS=Neurospora crassa;	PF00464.20;PF00155.22;PF00266.20	GO:0035999;GO:0019264;GO:0032259;GO:0005737;GO:0004372;GO:0030170;GO:000816	BP:tetrahydrofolate interconversion;BP:glycine biosynthetic process from serine;BP:methylation;CC:cytoplasm;MF:glycine hydroxymethyltransferase activity;MF:pyridoxal phosphate binding;MF:methyltransferase activity;	K00600	glyA, SHMT	map00460;map00630;map00680;map00670;map00260	Cyanoamino acid metabolism;Glyoxylate and dicarboxylate metabolism;Methane metabolism;One carbon pool by folate;Glycine, serine and threonine metabolism
FVER_00787	XP_018241973.1	hypothetical protein FOXG_06243 [Fusarium oxysporum f. sp. lycopersici 4287]	sp|G0S0R2|NUP57_CHATD;	Nucleoporin NUP57 OS=Chaetomium thermophilum;	PF13874.7;PF18570.2;PF18652.2	GO:000564	CC:nuclear pore;	K14308	NUP54, NUP57	map03013	RNA transport
FVER_00822	PNP79578.1	hypothetical protein FNYG_07194 [Fusarium nygamai]	sp|Q92374|RFA3_SCHPO;	Replication factor A protein 3 OS=Schizosaccharomyces pombe;	PF08661.12	GO:0006310;GO:0006281;GO:0006260;GO:0005634;GO:000367	BP:DNA recombination;BP:DNA repair;BP:DNA replication;CC:nucleus;MF:DNA binding;	K10740	RPA3	map03430;map03440;map03420;map03030	Mismatch repair;Homologous recombination;Nucleotide excision repair;DNA replication
FVER_00854	CVK83342.1	related to RRP46 protein, involved in rRNA processing [Fusarium mangiferae]	sp|P53256|RRP46_YEAST;	Exosome complex component RRP46 OS=Saccharomyces cerevisiae;	PF01138.22	------	------	K12590	RRP46, EXOSC5	map03018	RNA degradation
FVER_00867	XP_023424214.1	uncharacterized protein FFUJ_01344 [Fusarium fujikuroi IMI 58289]	sp|G0S0E7|NU120_CHATD;	Nucleoporin NUP120 OS=Chaetomium thermophilum;	PF11715.9	------	------	nhe;K14303	;NUP160, NUP120	map03013	RNA transport
FVER_00869	XP_023426565.1	related to phosphoribosylformylglycinamidine synthase [Fusarium fujikuroi IMI 58289]	sp|P38972|PUR4_YEAST;	Phosphoribosylformylglycinamidine synthase OS=Saccharomyces cerevisiae;	PF13507.7;PF02769.23;PF18076.2;PF18072.2	GO:0006541;GO:0006189;GO:000464	BP:glutamine metabolic process;BP:'de novo' IMP biosynthetic process;MF:phosphoribosylformylglycinamidine synthase activity;	K01952	PFAS, purL	map00230	Purine metabolism
FVER_00871	XP_018748328.1	branched-chain amino acid aminotransferase [Fusarium verticillioides 7600]	sp|P38891|BCA1_YEAST;	Branched-chain-amino-acid aminotransferase, mitochondrial OS=Saccharomyces cerevisiae;	PF01063.20	GO:0009082;GO:0052654;GO:0052655;GO:005265	BP:branched-chain amino acid biosynthetic process;MF:L-leucine transaminase activity;MF:L-valine transaminase activity;MF:L-isoleucine transaminase activity;	K00826	E2.6.1.42, ilvE	map00270;map00770;map00280;map00290	Cysteine and methionine metabolism;Pantothenate and CoA biosynthesis;Valine, leucine and isoleucine degradation;Valine, leucine and isoleucine biosynthesis
FVER_00872	CVK99520.1	related to kinesin [Fusarium mangiferae]	sp|Q86Z98|KINH_GIBMO;	Kinesin heavy chain OS=Gibberella moniliformis OX=117187 GN=KLP1 PE=3 SV=1;	PF00225.24;PF16796.6	GO:0007018;GO:0005737;GO:0005874;GO:0008017;GO:0005524;GO:000377	BP:microtubule-based movement;CC:cytoplasm;CC:microtubule;MF:microtubule binding;MF:ATP binding;MF:microtubule motor activity;	K10396	KIF5	map04144	Endocytosis
FVER_00939	XP_018245478.1	acetyl-CoA C-acetyltransferase [Fusarium oxysporum f. sp. lycopersici 4287]	sp|Q6AZA0|THIL_DANRE;	Acetyl-CoA acetyltransferase, mitochondrial OS=Danio rerio OX=7955 GN=acat1 PE=2 SV=1;	PF00108.24;PF02803.19;PF00109.27	GO:001674	MF:transferase activity, transferring acyl groups other than amino-acyl groups;	K00626	E2.3.1.9, atoB	map00630;map00310;map00640;map00650;map00620;map00900;map00072;map00071;map00280;map00380	Glyoxylate and dicarboxylate metabolism;Lysine degradation;Propanoate metabolism;Butanoate metabolism;Pyruvate metabolism;Terpenoid backbone biosynthesis;Synthesis and degradation of ketone bodies;Fatty acid degradation;Valine, leucine and isoleucine degradation;Tryptophan metabolism
FVER_00942	CVL01237.1	related to NAM7-nonsense-mediated mRNA decay protein [Fusarium mangiferae]	sp|O60306|AQR_HUMAN;	RNA helicase aquarius OS=Homo sapiens OX=9606 GN=AQR PE=1 SV=4;	PF16399.6;PF13087.7;PF13086.7;PF13604.7;PF04851.16;PF13245.7	GO:0045292;GO:0005684;GO:000438	BP:mRNA cis splicing, via spliceosome;CC:U2-type spliceosomal complex;MF:helicase activity;	K12874	AQR	map03040	Spliceosome
FVER_01005	TDZ23657.1	Serine/threonine-protein phosphatase PP1 [Colletotrichum orbiculare MAFF 240422]	sp|Q9UW86|PP1_NEUCR;	Serine/threonine-protein phosphatase PP1 OS=Neurospora crassa;	PF00149.29;PF16891.6	GO:0072357;GO:0000164;GO:0046872;GO:0004722;GO:000472	CC:PTW/PP1 phosphatase complex;CC:protein phosphatase type 1 complex;MF:metal ion binding;MF:protein serine/threonine phosphatase activity;MF:phosphoprotein phosphatase activity;	K06269	PPP1C	map04113;map03015	Meiosis - yeast;mRNA surveillance pathway
FVER_01039	RBQ93118.1	hypothetical protein FVER53263_01184 [Fusarium verticillioides]	sp|Q03392|PCNA_SCHPO;	Proliferating cell nuclear antigen OS=Schizosaccharomyces pombe;	PF00705.19;PF02747.16;PF04139.14;PF04005.13;PF02144.17	GO:0030466;GO:0034087;GO:0035753;GO:0070914;GO:0006348;GO:1900264;GO:0042276;GO:0006260;GO:0000710;GO:0006289;GO:1903364;GO:0006272;GO:1902394;GO:0006275;GO:0070987;GO:1903459;GO:1903022;GO:0000781;GO:0035861;GO:0005634;GO:0005654;GO:0000790;GO:0043626;GO:0043596;GO:0017022;GO:0003677;GO:0042802;GO:003033	BP:chromatin silencing at silent mating-type cassette;BP:establishment of mitotic sister chromatid cohesion;BP:maintenance of DNA trinucleotide repeats;BP:UV-damage excision repair;BP:chromatin silencing at telomere;BP:positive regulation of DNA-directed DNA polymerase activity;BP:error-prone translesion synthesis;BP:DNA replication;BP:meiotic mismatch repair;BP:nucleotide-excision repair;BP:posi…	K04802	PCNA	map03430;map03410;map03420;map03030	Mismatch repair;Base excision repair;Nucleotide excision repair;DNA replication
FVER_01124	EXL53908.1	hypothetical protein FOCG_07030 [Fusarium oxysporum f. sp. radicis-lycopersici 26381]	sp|P40384|SPO11_SCHPO;	Meiotic recombination protein rec12 OS=Schizosaccharomyces pombe;	PF04406.15	GO:0000737;GO:0005694;GO:0016889;GO:0005524;GO:000367	BP:DNA catabolic process, endonucleolytic;CC:chromosome;MF:endodeoxyribonuclease activity, producing 3'-phosphomonoesters;MF:ATP binding;MF:DNA binding;	K10878	SPO11	map04113	Meiosis - yeast
FVER_01149	XP_031080799.1	related to exportin T (tRNA exportin) [Fusarium proliferatum ET1]	sp|Q2H6R9|XPOT_CHAGB;	Exportin-T OS=Chaetomium globosum;	PF08389.13	GO:0071528;GO:0005737;GO:0005634;GO:0000049;GO:000853	BP:tRNA re-export from nucleus;CC:cytoplasm;CC:nucleus;MF:tRNA binding;MF:Ran GTPase binding;	K14288	XPOT	map03013	RNA transport
FVER_01171	KLO86191.1	GTP-binding protein [Fusarium fujikuroi]	sp|Q7SHR8|NOG2_NEUCR;	Nucleolar GTP-binding protein 2 OS=Neurospora crassa;	PF08153.13;PF01926.24;PF02421.19;PF03193.17	GO:0005730;GO:000552	CC:nucleolus;MF:GTP binding;	K14537	NUG2, GNL2	map03008	Ribosome biogenesis in eukaryotes
FVER_01178	EGU74688.1	hypothetical protein FOXB_14788, partial [Fusarium oxysporum Fo5176]	sp|Q05871|ECI1_YEAST;	3,2-trans-enoyl-CoA isomerase OS=Saccharomyces cerevisiae;	PF00378.21;PF16113.6	GO:0006351;GO:0042025;GO:0016853;GO:0003824;GO:000367	BP:transcription, DNA-templated;CC:host cell nucleus;MF:isomerase activity;MF:catalytic activity;MF:DNA binding;	K13239	ECI2, PECI	map04146;map00071	Peroxisome;Fatty acid degradation
FVER_01218	PNP82353.1	hypothetical protein FNYG_04542 [Fusarium nygamai]	sp|Q01447|ERG24_FUSSO;	Delt;	PF01222.18	GO:0016126;GO:0016021;GO:001662	BP:sterol biosynthetic process;CC:integral component of membrane;MF:oxidoreductase activity, acting on the CH-CH group of donors, NAD or NADP as acceptor;	K00222	TM7SF2, ERG24	map00100	Steroid biosynthesis
FVER_01226	XP_031047910.1	glycerol 3-phosphatase 1 [Fusarium oxysporum NRRL 32931]	sp|P41277|GPP1_YEAST;	Glycerol-1-phosphate phosphohydrolase 1 OS=Saccharomyces cerevisiae;	PF13419.7;PF00702.27;PF12710.8;PF13242.7	GO:001678	MF:hydrolase activity;	K06116	GPP	map00561	Glycerolipid metabolism
FVER_01334	QGI60349.1	hypothetical protein CEK27_004320 [Fusarium fujikuroi]	sp|G0S488|NMD3_CHATD;	60S ribosomal export protein NMD3 OS=Chaetomium thermophilum;	PF04981.14	GO:0000055;GO:0015031;GO:0005737;GO:0005634;GO:0005829;GO:0070180;GO:004302	BP:ribosomal large subunit export from nucleus;BP:protein transport;CC:cytoplasm;CC:nucleus;CC:cytosol;MF:large ribosomal subunit rRNA binding;MF:ribosomal large subunit binding;	K07562	NMD3	map03008;map03013	Ribosome biogenesis in eukaryotes;RNA transport
FVER_01436	RKK82914.1	Ankyrin repeat protein nuc-2 [Fusarium oxysporum]	sp|Q01317|NUC2_NEUCR;	Ankyrin repeat protein nuc-2 OS=Neurospora crassa;	PF12796.8;PF13637.7;PF03105.20;PF13857.7;PF13606.7;PF03009.18	GO:0006629;GO:000808	BP:lipid metabolic process;MF:phosphoric diester hydrolase activity;	K06653	PHO81	map04111	Cell cycle - yeast
FVER_01493	TXB99785.1	hypothetical protein FocTR4_00014167, partial [Fusarium oxysporum f. sp. cubense]	sp|Q0GYU5|GLD1_HYPJE;	D/L-glyceraldehyde reductase OS=Hypocrea jecorina OX=51453 GN=gld1 PE=1 SV=1;	PF00248.22	GO:001649	MF:oxidoreductase activity;	K18107	GAAD	map00040	Pentose and glucuronate interconversions
FVER_01497	RBA11585.1	hypothetical protein FPRO05_04757 [Fusarium proliferatum]	sp|Q9HDW5|YFW6_SCHPO;	UPF0644 protein PB2B4.06 OS=Schizosaccharomyces pombe;	PF03061.23	------	------	K00860	cysC	map00230;map00920	Purine metabolism;Sulfur metabolism
FVER_01500	XP_031077682.1	related to mannosyltransferase [Fusarium proliferatum ET1]	sp|Q9C1K8|ALG3_NEUCR;	Dol-P-Man:Ma;	PF05208.14	GO:0006486;GO:0030176;GO:005292	BP:protein glycosylation;CC:integral component of endoplasmic reticulum membrane;MF:dol-P-Ma;	K03845	ALG3	map00510;map00513	N-Glycan biosynthesis;Various types of N-glycan biosynthesis
FVER_01513	XP_018754656.1	argininosuccinate lyase [Fusarium verticillioides 7600]	sp|P50514|ARLZ_SCHPO;	Probable argininosuccinate lyase OS=Schizosaccharomyces pombe;	PF00206.21;PF14698.7	GO:0042450;GO:000405	BP:arginine biosynthetic process via ornithine;MF:argininosuccinate lyase activity;	K01755	argH, ASL	map00220;map00250	Arginine biosynthesis;Alanine, aspartate and glutamate metabolism
FVER_01583	KAF4422119.1	cell division control 45 [Fusarium acutatum]	sp|O74113|CDC45_SCHPO;	Cell division control protein 45 homolog OS=Schizosaccharomyces pombe;	PF02724.15	GO:0006270;GO:005130	BP:DNA replication initiation;BP:cell division;	K06628	CDC45	map04111;map04113	Cell cycle - yeast;Meiosis - yeast
FVER_01594	CVK88425.1	probable 2-isopropylmalalate synthase [Fusarium mangiferae]	sp|O59736|LEU1_SCHPO;	2-isopropylmalate synthase OS=Schizosaccharomyces pombe;	PF00682.20;PF08502.11	GO:0009098;GO:000385	BP:leucine biosynthetic process;MF:2-isopropylmalate synthase activity;	K01649	leuA, IMS	map00620;map00290	Pyruvate metabolism;Valine, leucine and isoleucine biosynthesis
FVER_01605	XP_023424407.1	related to small nuclear ribonucleoprotein U2B [Fusarium fujikuroi IMI 58289]	sp|A0A0E0RMV2|ATG10_GIBZE;	Ubiquitin-like-conjugating enzyme ATG10 OS=Gibberella zeae;	PF00076.23;PF13893.7	GO:000372	MF:RNA binding;	K17888	ATG10L, ATG10	map04136;map04138	Autophagy - other;Autophagy - yeast
FVER_01616	SCN72814.1	related to nuclear pore protein [Fusarium fujikuroi]	sp|G0SER9|NUP84_CHATD;	Nucleoporin NUP84 OS=Chaetomium thermophilum;	PF04121.14	GO:0006606;GO:0006406;GO:0031965;GO:0031080;GO:001705	BP:protein import into nucleus;BP:mRNA export from nucleus;CC:nuclear membrane;CC:nuclear pore outer ring;MF:structural constituent of nuclear pore;	K14301	NUP107, NUP84	map03013	RNA transport
FVER_01688	KAF4415534.1	homocitrate synthase [Fusarium acutatum]	sp|Q12726|HOSM_YARLI;	Homocitrate synthase, mitochondrial OS=Yarrowia lipolytica;	PF00682.20	GO:0019752;GO:004691	BP:carboxylic acid metabolic process;MF:transferase activity, transferring acyl groups, acyl groups converted into alkyl on transfer;	K01655	LYS21, LYS20	map00300;map00620	Lysine biosynthesis;Pyruvate metabolism
FVER_01735	XP_023429680.1	probable bifunctional D12/D15 fatty acid desaturase [Fusarium fujikuroi IMI 58289]	sp|B4YQU1|FAH12_CLAPU;	Oleate hydroxylase FAH12 OS=Claviceps purpurea OX=5111 GN=FAH12 PE=1 SV=1;	PF00487.25	GO:0006629;GO:001602	BP:lipid metabolic process;CC:integral component of membrane;	K22993	K22993	map01040	Biosynthesis of unsaturated fatty acids
FVER_01749	XP_018746645.1	protein Ras-2 [Fusarium verticillioides 7600]	sp|G4N1S3|RAS1_MAGO7;	Ras-like protein 1 OS=Magnaporthe oryzae;	PF00071.23;PF08477.14	GO:0007165;GO:0016020;GO:0003924;GO:000552	BP:signal transduction;CC:membrane;MF:GTPase activity;MF:GTP binding;	K07827	KRAS, KRAS2	map04213;map04113;map04933;map04138	Longevity regulating pathway - multiple species;Meiosis - yeast;AGE-RAGE signaling pathway in diabetic complications;Autophagy - yeast
FVER_01800	CVK83192.1	probable mitotic control protein dis3+ [Fusarium mangiferae]	sp|P37202|DIS3_SCHPO;	Exosome complex exonuclease dis3 OS=Schizosaccharomyces pombe;	PF00773.20;PF17215.4;PF17216.4;PF17849.2;PF13638.7;PF17876.2	GO:0004527;GO:0004540;GO:000372	MF:exonuclease activity;MF:ribonuclease activity;MF:RNA binding;	K12585	DIS3, RRP44	map03018	RNA degradation
FVER_01815	RBQ80563.1	hypothetical protein FVER14953_04016 [Fusarium verticillioides]	sp|Q69ZS7|HBS1L_MOUSE;	HBS1-like protein OS=Mus musculus OX=10090 GN=Hbs1l PE=1 SV=2;	------	GO:0003746;GO:0003924;GO:000552	MF:translation elongation factor activity;MF:GTPase activity;MF:GTP binding;	K14416	HBS1	map03015	mRNA surveillance pathway
FVER_01850	CVK84901.1	related to YSA1 sugar-nucleotide hydrolase [Fusarium mangiferae]	sp|Q01976|ADPP_YEAST;	ADP-ribose pyrophosphatase OS=Saccharomyces cerevisiae;	PF00293.29	GO:001678	MF:hydrolase activity;	K01515	nudF	map00230	Purine metabolism
FVER_01875	XP_023425981.1	probable translation initiation factor eIF-2 alpha chain [Fusarium fujikuroi IMI 58289]	sp|P20459|IF2A_YEAST;	Eukaryotic translation initiation factor 2 subunit alpha OS=Saccharomyces cerevisiae;	PF07541.13;PF00575.24	GO:000374	MF:translation initiation factor activity;	K03237	EIF2S1	map03013;map04141;map04138	RNA transport;Protein processing in endoplasmic reticulum;Autophagy - yeast
FVER_01941	CVK83413.1	related to component of the anaphase promoting complex [Fusarium mangiferae]	sp|Q9UJX6|ANC2_HUMAN;	Anaphase-promoting complex subunit 2 OS=Homo sapiens OX=9606 GN=ANAPC2 PE=1 SV=1;	PF00888.23;PF08672.12	GO:0006511;GO:003162	BP:ubiquitin-dependent protein catabolic process;MF:ubiquitin protein ligase binding;	K03349	APC2	map04111;map04113;map04120	Cell cycle - yeast;Meiosis - yeast;Ubiquitin mediated proteolysis
FVER_01948	XP_023428933.1	related to RNA splicing factor PRP9 [Fusarium fujikuroi IMI 58289]	sp|O59706|SAP61_SCHPO;	Pre-mRNA-splicing factor sap61 OS=Schizosaccharomyces pombe;	PF11931.9;PF16837.6;PF12108.9;PF12874.8;PF12171.9	GO:0000398;GO:0005681;GO:0003723;GO:000827	BP:mRNA splicing, via spliceosome;CC:spliceosomal complex;MF:RNA binding;MF:zinc ion binding;	K12827	SF3A3, SAP61, PRP9	map03040	Spliceosome
FVER_01965	RBR20490.1	hypothetical protein FVER53590_00716 [Fusarium verticillioides]	sp|P80235|CACM_YEAST;	Putative mitochondrial carnitine O-acetyltransferase OS=Saccharomyces cerevisiae;	PF00806.20	GO:000372	MF:RNA binding;	K00624	E2.3.1.7	map04146	Peroxisome
FVER_01989	XP_018240812.1	hypothetical protein FOXG_05495 [Fusarium oxysporum f. sp. lycopersici 4287]	sp|Q755T8|IMP4_ASHGO;	U3 small nucleolar ribonucleoprotein protein IMP4 OS=Ashbya gossypii;	PF04427.19	------	------	K14561	IMP4	map03008	Ribosome biogenesis in eukaryotes
FVER_02002	CVK93041.1	probable POT1-acetyl-CoA C-acyltransferase, peroxisomal [Fusarium mangiferae]	sp|Q05493|THIK_YARLI;	3-ketoacyl-CoA thiolase, peroxisomal OS=Yarrowia lipolytica;	PF00108.24;PF02803.19	GO:001674	MF:transferase activity, transferring acyl groups other than amino-acyl groups;	K07513	ACAA1	map04146;map00592;map00280;map01040;map00071	Peroxisome;alpha-Linolenic acid metabolism;Valine, leucine and isoleucine degradation;Biosynthesis of unsaturated fatty acids;Fatty acid degradation
FVER_02074	XP_018755471.1	hypothetical protein FVEG_08855 [Fusarium verticillioides 7600]	sp|P38093|FLBA_EMENI;	Developmental regulator flbA OS=Emericella nidulans;	PF00615.20;PF00610.22	GO:003555	BP:intracellular signal transduction;	K19838	SST2	map04011	MAPK signaling pathway - yeast
FVER_02123	EGU85793.1	hypothetical protein FOXB_03641 [Fusarium oxysporum Fo5176]	sp|Q55CD9|NDH_DICDI;	Probable NADH dehydrogenase OS=Dictyostelium discoideum OX=44689 GN=DDB_G0270104 PE=3 SV=2;	PF07992.15;PF00070.28;PF13738.7	GO:001649	MF:oxidoreductase activity;	K03885	ndh	map00190	Oxidative phosphorylation
FVER_02171	XP_031075659.1	probable delta-1-pyrroline-5-carboxylate dehydrogenase [Fusarium proliferatum ET1]	sp|Q9P8I0|PUT2_EMENI;	Delta-1-pyrroline-5-carboxylate dehydrogenase, mitochondrial OS=Emericella nidulans;	PF00171.23	GO:0010133;GO:0003842;GO:001662	BP:proline catabolic process to glutamate;MF:1-pyrroline-5-carboxylate dehydrogenase activity;MF:oxidoreductase activity, acting on the aldehyde or oxo group of donors, NAD or NADP as acceptor;	K00294	E1.2.1.88	map00250;map00330	Alanine, aspartate and glutamate metabolism;Arginine and proline metabolism
FVER_02204	PNP81857.1	hypothetical protein FNYG_04883 [Fusarium nygamai]	sp|G0S4T0|NU192_CHATD;	Nucleoporin NUP192 OS=Chaetomium thermophilum;	PF11894.9	GO:000564	CC:nuclear pore;	K14310	NUP205, NUP192	map03013	RNA transport
FVER_02212	XP_018235065.1	mannan polymerase II complex MNN10 subunit [Fusarium oxysporum f. sp. lycopersici 4287]	sp|P50108|MNN10_YEAST;	Probable alpha-1,6-mannosyltransferase MNN10 OS=Saccharomyces cerevisiae;	PF05637.13	GO:0016021;GO:001675	CC:integral component of membrane;MF:transferase activity, transferring glycosyl groups;	K05531	MNN10	map00513	Various types of N-glycan biosynthesis
FVER_02299	RBA11906.1	hypothetical protein FPRO05_03356 [Fusarium proliferatum]	sp|O94365|UTP15_SCHPO;	U3 small nucleolar RNA-associated protein 15 OS=Schizosaccharomyces pombe;	PF09384.11;PF00400.33;PF12894.8	GO:0006364;GO:000573	BP:rRNA processing;CC:nucleolus;	K14549	UTP15	map03008	Ribosome biogenesis in eukaryotes
FVER_02394	QGI80168.1	hypothetical protein CEK25_006897 [Fusarium fujikuroi]	sp|Q96WJ0|ERG7_PNECA;	Lanosterol synthase OS=Pneumocystis carinii OX=4754 GN=ERG7 PE=2 SV=1;	PF13243.7;PF13249.7;PF00432.22	GO:0016104;GO:0005811;GO:0000250;GO:004230	BP:triterpenoid biosynthetic process;CC:lipid particle;MF:lanosterol synthase activity;MF:beta-amyrin synthase activity;	K01852	LSS, ERG7	map00100	Steroid biosynthesis
FVER_02398	CVK90758.1	probable isovaleryl-CoA dehydrogenase [Fusarium mangiferae]	sp|Q9FS87|IVD_SOLTU;	Isovaleryl-CoA dehydrogenase, mitochondrial OS=Solanum tuberosum OX=4113 GN=IVD PE=1 SV=2;	PF00441.25;PF02771.17;PF02770.20;PF08028.12;PF11794.9	GO:0003995;GO:005066	MF:acyl-CoA dehydrogenase activity;MF:flavin adenine dinucleotide binding;	K00253	IVD, ivd	map00280	Valine, leucine and isoleucine degradation
FVER_02429	XP_018234422.1	hypothetical protein FOXG_01596 [Fusarium oxysporum f. sp. lycopersici 4287]	sp|O13610|FCF1_SCHPO;	rRNA-processing protein fcf1 OS=Schizosaccharomyces pombe;	PF04900.13;PF18477.2	GO:0006351;GO:0000472;GO:0000447;GO:0000480;GO:0032040;GO:0005730;GO:0005634;GO:0004521;GO:0003677;GO:0000981;GO:000827	BP:transcription, DNA-templated;BP:endonucleolytic cleavage to generate mature 5'-end of SSU-rRNA fro;BP:endonucleolytic cleavage in ITS1 to separate SSU-rRNA from 5.8S rRNA and LSU-rRNA from tricistronic rRNA transcrip;BP:endonucleolytic cleavage in 5'-ETS of tricistronic rRNA transcrip;CC:small-subunit processome;CC:nucleolus;CC:nucleus;MF:endoribonuclease activity;MF:DNA binding;MF:RNA polymer…	K14566	UTP24, FCF1	map03008	Ribosome biogenesis in eukaryotes
FVER_02441	XP_023432319.1	probable pantothenate kinase [Fusarium fujikuroi IMI 58289]	sp|O74962|PANK_SCHPO;	Pantothenate kinase OS=Schizosaccharomyces pombe;	PF03630.15	GO:0015937;GO:0004594;GO:000552	BP:coenzyme A biosynthetic process;MF:pantothenate kinase activity;MF:ATP binding;	K09680	coaW	map00770	Pantothenate and CoA biosynthesis
FVER_02443	XP_023430445.1	related to high mobility group-like protein NHP2 [Fusarium fujikuroi IMI 58289]	sp|P32495|NHP2_YEAST;	H/ACA ribonucleoprotein complex subunit NHP2 OS=Saccharomyces cerevisiae;	PF01248.27	GO:0042254;GO:199090	BP:ribosome biogenesis;CC:ribonucleoprotein complex;	K11129	NHP2, NOLA2	map03008	Ribosome biogenesis in eukaryotes
FVER_02448	PNP78216.1	hypothetical protein FNYG_08444 [Fusarium nygamai]	sp|P16929|ACSA_NEUCR;	Acetyl-coenzyme A synthetase OS=Neurospora crassa;	PF00501.29;PF13193.7;PF16177.6	GO:0019427;GO:0003987;GO:0016208;GO:000552	BP:acetyl-CoA biosynthetic process from acetate;MF:acetate-CoA ligase activity;MF:AMP binding;MF:ATP binding;	K01895	ACSS1_2, acs	map00680;map00630;map00640;map00620;map00010	Methane metabolism;Glyoxylate and dicarboxylate metabolism;Propanoate metabolism;Pyruvate metabolism;Glycolysis / Gluconeogenesis
FVER_02482	KLO79549.1	putative DNA ligase [Fusarium fujikuroi]	sp|Q7SB49|DNLI4_NEUCR;	DNA ligase 4 OS=Neurospora crassa;	PF01068.22;PF04675.15;PF09414.11;PF16589.6;PF04679.16;PF00533.27;PF16759.6;PF11411.9	GO:0006310;GO:0051103;GO:0006260;GO:0071897;GO:0005524;GO:0003910;GO:000367	BP:DNA recombination;BP:DNA ligation involved in DNA repair;BP:DNA replication;BP:DNA biosynthetic process;MF:ATP binding;MF:DNA ligas;MF:DNA binding;	K10777	LIG4, DNL4	map03450	Non-homologous end-joining
FVER_02607	SCO88047.1	related to transcriptional regulator ARG82 [Fusarium oxysporum]	sp|P07250|IPMK_YEAST;	Inositol polyphosphate multikinase OS=Saccharomyces cerevisiae;	PF03770.17	GO:0032958;GO:001630	BP:inositol phosphate biosynthetic process;MF:kinase activity;	K00915	IPMK, IPK2	map04070;map04138;map00562	Phosphatidylinositol signaling system;Autophagy - yeast;Inositol phosphate metabolism
FVER_02643	XP_023433535.1	probable tryptophan synthase [Fusarium fujikuroi IMI 58289]	sp|P13228|TRP_NEUCR;	Tryptophan synthase OS=Neurospora crassa;	PF00290.21;PF00291.26	GO:000483	MF:tryptophan synthase activity;	K01694	TRP	map00400;map00260	Phenylalanine, tyrosine and tryptophan biosynthesis;Glycine, serine and threonine metabolism
FVER_02671	CVK93655.1	probable nicotinamide mononucleotide adenylyltransferase [Fusarium mangiferae]	sp|Q9UT53|NMAH_SCHPO;	Nicotinamide/nicotinic acid mononucleotide adenylyltransferase OS=Schizosaccharomyces pombe;	PF01467.27	GO:0009435;GO:0000309;GO:000552	BP:NAD biosynthetic process;MF:nicotinamide-nucleotide adenylyltransferase activity;MF:ATP binding;	K06210	NMNAT	map00760	Nicotinate and nicotinamide metabolism
FVER_02724	RBA12752.1	hypothetical protein FPRO05_04202 [Fusarium proliferatum]	sp|Q54CX6|3HIDH_DICDI;	Probable 3-hydroxyisobutyrate dehydrogenase, mitochondrial OS=Dictyostelium discoideum OX=44689 GN=hibA PE=3 SV=1;	PF03446.16;PF14833.7	GO:0051287;GO:0050661;GO:001649	MF:NAD binding;MF:NADP binding;MF:oxidoreductase activity;	K00020	HIBADH, mmsB	map00280	Valine, leucine and isoleucine degradation
FVER_02730	RBA11236.1	double-strand break repair protein MRE11 [Fusarium proliferatum]	sp|Q9C291|MRE11_NEUCR;	Double-strand break repair protein mus-23 OS=Neurospora crassa;	PF04152.15;PF00149.29;PF12850.8	GO:0000723;GO:0051321;GO:0006302;GO:1990918;GO:0042138;GO:0000724;GO:1990898;GO:0006303;GO:0031573;GO:0030870;GO:0000784;GO:1990421;GO:0035861;GO:0008408;GO:0004519;GO:003014	BP:telomere maintenance;BP:meiotic cell cycle;BP:double-strand break repair;BP:double-strand break repair involved in meiotic recombination;BP:meiotic DNA double-strand break formation;BP:double-strand break repair via homologous recombination;BP:meiotic DNA double-strand break clipping;BP:double-strand break repair via nonhomologous end joining;BP:intra-S DNA damage checkpoint;CC:Mre11 complex;C…	K10865	MRE11	map03450;map03440	Non-homologous end-joining;Homologous recombination
FVER_02731	RBQ73179.1	hypothetical protein FVER14953_03845 [Fusarium verticillioides]	sp|P54874|HMCS_SCHPO;	Hydroxymethylglutaryl-CoA synthase OS=Schizosaccharomyces pombe;	PF08540.11;PF01154.18	GO:0071949;GO:001649	MF:FAD binding;MF:oxidoreductase activity;	K01641	E2.3.3.10	map00900;map00280;map00072;map00650	Terpenoid backbone biosynthesis;Valine, leucine and isoleucine degradation;Synthesis and degradation of ketone bodies;Butanoate metabolism
FVER_02774	KAF4443899.1	DNA-directed RNA polymerase chain RPB5 [Fusarium acutatum]	sp|Q757H7|RPAB1_ASHGO;	DNA-directed RNA polymerases I, II, and III subunit RPABC1 OS=Ashbya gossypii;	PF01191.20;PF03871.15	GO:0006351;GO:0042025;GO:0003899;GO:000367	BP:transcription, DNA-templated;CC:host cell nucleus;MF:DNA-directed RNA polymerase activity;MF:DNA binding;	K03013	RPB5, POLR2E	map03020	RNA polymerase
FVER_02832	XP_018235179.1	ATP-dependent RNA helicase eIF4A [Fusarium oxysporum f. sp. lycopersici 4287]	sp|A4QVP2|IF4A_MAGO7;	ATP-dependent RNA helicase eIF4A OS=Magnaporthe oryzae;	PF00270.30;PF00271.32;PF04851.16;PF13604.7;PF13245.7	GO:0005737;GO:0004386;GO:0003724;GO:0003676;GO:0005524;GO:000374	CC:cytoplasm;MF:helicase activity;MF:RNA helicase activity;MF:nucleic acid binding;MF:ATP binding;MF:translation initiation factor activity;	K03257	EIF4A	map03013	RNA transport
FVER_02853	XP_018745320.1	alanine transaminase [Fusarium verticillioides 7600]	sp|P52893|ALAM_YEAST;	Probable alanine aminotransferase, mitochondrial OS=Saccharomyces cerevisiae;	PF00155.22	GO:0009058;GO:0003824;GO:003017	BP:biosynthetic process;MF:catalytic activity;MF:pyridoxal phosphate binding;	K00814	GPT, ALT	map00220;map00250	Arginine biosynthesis;Alanine, aspartate and glutamate metabolism
FVER_02861	CVK89728.1	probable periodic tryptophan protein PWP2 [Fusarium mangiferae]	sp|Q9C270|PWP2_NEUCR;	Periodic tryptophan protein 2 homolog OS=Neurospora crassa;	PF00400.33;PF04003.13;PF12894.8	------	------	K14558	PWP2, UTP1	map03008	Ribosome biogenesis in eukaryotes
FVER_02889	KAF4436049.1	fumarylacetoacetate hydrolase [Fusarium acutatum]	sp|Q00770|FAAA_EMENI;	Fumarylacetoacetase OS=Emericella nidulans;	PF01557.19;PF09298.12	GO:0006572;GO:0006559;GO:0004334;GO:004687	BP:tyrosine catabolic process;BP:L-phenylalanine catabolic process;MF:fumarylacetoacetase activity;MF:metal ion binding;	K01555	FAH, fahA	map00350	Tyrosine metabolism
FVER_02946	CVL08909.1	probable peroxisomal amine oxidase (copper-containing) [Fusarium proliferatum]	sp|Q9P7F2|CAO1_SCHPO;	Copper amine oxidase 1 OS=Schizosaccharomyces pombe;	PF01179.21;PF02728.17;PF02727.17	GO:0009308;GO:0048038;GO:0005507;GO:000813	BP:amine metabolic process;MF:quinone binding;MF:copper ion binding;MF:primary amine oxidase activity;	K00276	AOC3, AOC2, tynA	map00350;map00360;map00410;map00260	Tyrosine metabolism;Phenylalanine metabolism;beta-Alanine metabolism;Glycine, serine and threonine metabolism
FVER_03032	XP_023425933.1	probable GTP-binding protein [Fusarium fujikuroi IMI 58289]	sp|G0S8F1|NOG1_CHATD;	Nucleolar GTP-binding protein 1 OS=Chaetomium thermophilum;	PF17835.2;PF08155.12;PF06858.15;PF01926.24;PF02421.19	GO:0042273;GO:0042254;GO:0000054;GO:1902626;GO:0006364;GO:0005737;GO:0005730;GO:0030687;GO:000552	BP:ribosomal large subunit biogenesis;BP:ribosome biogenesis;BP:ribosomal subunit export from nucleus;BP:assembly of large subunit precursor of preribosome;BP:rRNA processing;CC:cytoplasm;CC:nucleolus;CC:preribosome, large subunit precursor;MF:GTP binding;	K06943	NOG1	map03008	Ribosome biogenesis in eukaryotes
FVER_03093	XP_031061679.1	glycerol kinase [Fusarium oxysporum f. sp. cubense tropical race 4 54006]	sp|A6WXV2|GLPK_OCHA4;	Glycerol kinase OS=Ochrobactrum anthropi;	PF02782.17;PF00370.22	GO:0005975;GO:0006072;GO:000437	BP:carbohydrate metabolic process;BP:glycerol-3-phosphate metabolic process;MF:glycerol kinase activity;	K00864	glpK, GK	map00561	Glycerolipid metabolism
FVER_03102	XP_031089096.1	related to TGL4-triacylglycerol lipase [Fusarium proliferatum ET1]	sp|P36165|TGL4_YEAST;	Lipase 4 OS=Saccharomyces cerevisiae;	PF11815.9;PF01734.23	GO:0016042;GO:0016020;GO:000480	BP:lipid catabolic process;CC:membrane;MF:triglyceride lipase activity;	K14674	TGL4	map00565;map00564;map00561;map00590;map00591;map00592;map00100	Ether lipid metabolism;Glycerophospholipid metabolism;Glycerolipid metabolism;Arachidonic acid metabolism;Linoleic acid metabolism;alpha-Linolenic acid metabolism;Steroid biosynthesis
FVER_03123	KAF4441490.1	ran GTPase activating 1 [Fusarium acutatum]	sp|P41391|RNA1_SCHPO;	Ran GTPase-activating protein 1 OS=Schizosaccharomyces pombe;	PF13516.7	GO:0046827;GO:0005737;GO:0031965;GO:000509	BP:positive regulation of protein export from nucleus;CC:cytoplasm;CC:nuclear membrane;MF:GTPase activator activity;	K14319	RANGAP1	map03013	RNA transport
FVER_03175	XP_018249751.1	hypothetical protein FOXG_11509 [Fusarium oxysporum f. sp. lycopersici 4287]	sp|O94266|THI22_SCHPO;	Putative hydroxymethylpyrimidine/phosphomethylpyrimidine kinase 2 OS=Schizosaccharomyces pombe;	PF08543.13;PF03070.17;PF00294.25	GO:0031929;GO:0009228;GO:0031932;GO:0008972;GO:005033	BP:TOR signaling;BP:thiamine biosynthetic process;CC:TORC2 complex;MF:phosphomethylpyrimidine kinase activity;MF:thiaminase activity;	K00877	THI20	map00730	Thiamine metabolism
FVER_03266	XP_018754009.1	aspartate kinase [Fusarium verticillioides 7600]	sp|W7MS01|FUB3_GIBM7;	Aspartate kinase FUB3 OS=Gibberella moniliformis;	PF00696.29;PF01842.26;PF13840.7	GO:0008652;GO:0009089;GO:000407	BP:cellular amino acid biosynthetic process;BP:lysine biosynthetic process via diaminopimelate;MF:aspartate kinase activity;	K00928	lysC	map00270;map00300;map00260;map00261	Cysteine and methionine metabolism;Lysine biosynthesis;Glycine, serine and threonine metabolism;Monobactam biosynthesis
FVER_03273	XP_018245561.1	pyridoxine biosynthesis protein PDX1 [Fusarium oxysporum f. sp. lycopersici 4287]	sp|O59905|PDX1_CERNC;	Pyridoxal 5'-phosphate synthase subunit PDX1 OS=Cercospora nicotianae OX=29003 GN=PDX1 PE=1 SV=1;	PF01680.18;PF05690.15;PF00218.22	GO:0042823;GO:000382	BP:pyridoxal phosphate biosynthetic process;MF:catalytic activity;	K06215	pdxS, pdx1	map00750	Vitamin B6 metabolism
FVER_03405	RKL24611.1	Mannan polymerase II complex ANP1 subunit [Fusarium oxysporum]	sp|O74745|ANP1_SCHPO;	Mannan polymerase II complex anp1 subunit OS=Schizosaccharomyces pombe;	PF03452.15	GO:001602	CC:integral component of membrane;	K05533	ANP1	map00513	Various types of N-glycan biosynthesis
FVER_03458	XP_031075730.1	related to ubiquitin-conjugating enzyme [Fusarium proliferatum ET1]	sp|Q6PCF7|UBE2Z_XENLA;	Ubiquitin-conjugating enzyme E2 Z OS=Xenopus laevis OX=8355 GN=ube2z PE=2 SV=2;	PF00179.27	------	------	K10585	UBE2Z	map04120	Ubiquitin mediated proteolysis
FVER_03489	XP_023428165.1	related to SAD1-SnRNP assembly defective [Fusarium fujikuroi IMI 58289]	sp|Q9USR2|UBP10_SCHPO;	Probable mRNA-splicing protein ubp10 OS=Schizosaccharomyces pombe;	PF01652.19	GO:0000245;GO:0016579;GO:0036459;GO:000827	BP:spliceosomal complex assembly;BP:protein deubiquitination;MF:thiol-dependent ubiquitinyl hydrolase activity;MF:zinc ion binding;	K12847	USP39, SAD1	map03040	Spliceosome
FVER_03529	XP_023432371.1	probable GMP synthase [Fusarium fujikuroi IMI 58289]	sp|Q4HXF0|GUAA_GIBZE;	GMP synthase [glutamine-hydrolyzing] OS=Gibberella zeae;	PF00958.23;PF00117.29;PF02540.18;PF07722.14	GO:0006541;GO:0016462;GO:0003922;GO:000552	BP:glutamine metabolic process;MF:pyrophosphatase activity;MF:GMP synthas;MF:ATP binding;	K01951	guaA, GMPS	map00230	Purine metabolism
FVER_03579	XP_031081806.1	related to archipelago beta form (F-box-WD40 repeat protein) [Fusarium proliferatum ET1]	sp|P87060|POP1_SCHPO;	WD repeat-containing protein pop1 OS=Schizosaccharomyces pombe;	PF00400.33;PF12937.8;PF00646.34	------	------	K03361	CDC4	map04111;map04120	Cell cycle - yeast;Ubiquitin mediated proteolysis
FVER_03585	KLO91380.1	Ribonuclease III [Fusarium fujikuroi]	sp|P22192|PAC1_SCHPO;	Double-strand-specific pac1 ribonuclease OS=Schizosaccharomyces pombe;	PF00636.27;PF14622.7	GO:0006396;GO:000452	BP:RNA processing;MF:ribonuclease III activity;	K03685	rnc, DROSHA, RNT1	map03008	Ribosome biogenesis in eukaryotes
FVER_03608	XP_023424022.1	probable uroporphyrinogen decarboxylase [Fusarium fujikuroi IMI 58289]	sp|P32347|DCUP_YEAST;	Uroporphyrinogen decarboxylase OS=Saccharomyces cerevisiae;	PF01208.18	GO:0006782;GO:000485	BP:protoporphyrinogen IX biosynthetic process;MF:uroporphyrinogen decarboxylase activity;	K01599	hemE, UROD	map00860	Porphyrin and chlorophyll metabolism
FVER_03702	XP_023433448.1	related to cyclosome/APC subunit Cut20/Apc4 [Fusarium fujikuroi IMI 58289]	sp|O42839|APC4_SCHPO;	Anaphase-promoting complex subunit 4 OS=Schizosaccharomyces pombe;	PF12896.8;PF12894.8	GO:0006890;GO:0031145;GO:0015031;GO:0030071;GO:0000139;GO:0030126;GO:000568	BP:retrograde vesicle-mediated transport, Golgi to ER;BP:anaphase-promoting complex-dependent catabolic process;BP:protein transport;BP:regulation of mitotic metaphase/anaphase transition;CC:Golgi membrane;CC:COPI vesicle coat;CC:anaphase-promoting complex;	K03351	APC4	map04111;map04113;map04120	Cell cycle - yeast;Meiosis - yeast;Ubiquitin mediated proteolysis
FVER_03731	XP_023429194.1	related to trimethyllysine hydroxylase [Fusarium fujikuroi IMI 58289]	sp|Q96UB1|TMLH_NEUCR;	Trimethyllysine dioxygenase OS=Neurospora crassa;	PF02668.17;PF06155.13	GO:0045329;GO:0050353;GO:000550	BP:carnitine biosynthetic process;MF:trimethyllysine dioxygenase activity;MF:iron ion binding;	K00474	TMLHE	map00310	Lysine degradation
FVER_03762	KAF4502072.1	glutamate N-acetyltransferase precursor [Fusarium agapanthi]	sp|C7YUB3|ARGJ_NECH7;	Arginine biosynthesis bifunctional protein ArgJ, mitochondrial OS=Nectria haematococca;	PF01960.19	GO:0006526;GO:0005759;GO:0103045;GO:0004042;GO:000435	BP:arginine biosynthetic process;CC:mitochondrial matrix;MF:methione N-acyltransferase activity;MF:acetyl-Co;MF:glutamate N-acetyltransferase activity;	K00620	argJ	map00220	Arginine biosynthesis
FVER_03785	XP_023427586.1	probable SER33-3-phosphoglycerate dehydrogenase [Fusarium fujikuroi IMI 58289]	sp|P40510|SER33_YEAST;	D-3-phosphoglycerate dehydrogenase 2 OS=Saccharomyces cerevisiae;	PF02826.20;PF00389.31;PF03446.16	GO:0006564;GO:0051287;GO:000461	BP:L-serine biosynthetic process;MF:NAD binding;MF:phosphoglycerate dehydrogenase activity;	K00058	serA, PHGDH	map00680;map00270;map00260	Methane metabolism;Cysteine and methionine metabolism;Glycine, serine and threonine metabolism
FVER_03790	RBA10822.1	C-8 sterol isomerase [Fusarium proliferatum]	sp|Q92254|ERG2_NEUCR;	C-8 sterol isomerase OS=Neurospora crassa;	PF04622.13	GO:0016021;GO:001685	CC:integral component of membrane;MF:isomerase activity;	K09829	ERG2	map00100	Steroid biosynthesis
FVER_03823	KAF4419472.1	1-phosphatidylinositol phosphodiesterase [Fusarium acutatum]	sp|P14262|PLC_BACCE;	1-phosphatidylinositol phosphodiesterase OS=Bacillus cereus OX=1396 PE=1 SV=1;	PF00388.20	GO:0006629;GO:000808	BP:lipid metabolic process;MF:phosphoric diester hydrolase activity;	K01771	plc	map00562	Inositol phosphate metabolism
FVER_03839	SCV35492.1	related to glucan 1,3-beta-glucosidase [Fusarium fujikuroi]	sp|B0Y7W2|EXGD_ASPFC;	Probable glucan 1,3-beta-glucosidase D OS=Neosartorya fumigata;	PF00150.19	GO:0005975;GO:0016021;GO:000455	BP:carbohydrate metabolic process;CC:integral component of membrane;MF:hydrolase activity, hydrolyzing O-glycosyl compounds;	K01210	E3.2.1.58	map00500	Starch and sucrose metabolism
FVER_03863	RKL23414.1	putative translation initiation factor eIF-2B subunit epsilon [Fusarium proliferatum]	sp|P56287|EI2BE_SCHPO;	Probable translation initiation factor eIF-2B subunit epsilon OS=Schizosaccharomyces pombe;	PF02020.19;PF00132.25;PF07959.13;PF00483.24	GO:000374	MF:translation initiation factor activity;	K03240	EIF2B5	map03013	RNA transport
FVER_03972	CVK92707.1	related to protein histidine kinase [Fusarium mangiferae]	sp|Q9P4U6|TCSB_EMENI;	Two-component system protein B OS=Emericella nidulans;	PF00072.25;PF02518.27;PF00512.26;PF00672.26	GO:0016021;GO:000015	CC:integral component of membrane;MF:phosphorelay sensor kinase activity;	K11231	SLN1	map04011;map04139	MAPK signaling pathway - yeast;Mitophagy - yeast
FVER_03998	XP_023432253.1	probable methionyl-tRNA synthetase [Fusarium fujikuroi IMI 58289]	sp|Q9UUF2|SYMC_SCHPO;	Probable methionine--tRNA ligase, cytoplasmic OS=Schizosaccharomyces pombe;	PF09334.12;PF00133.23	GO:0006431;GO:0004825;GO:000552	BP:methionyl-tRNA aminoacylation;MF:methionine-tRNA ligase activity;MF:ATP binding;	K01874	MARS, metG	map00450;map00970	Selenocompound metabolism;Aminoacyl-tRNA biosynthesis
FVER_04008	EXA39133.1	5'-3' exoribonuclease 2 [Fusarium oxysporum f. sp. pisi HDV247]	sp|Q4HWE2|XRN2_GIBZE;	5'-3' exoribonuclease 2 OS=Gibberella zeae;	PF17846.2;PF03159.19	GO:0006397;GO:0005634;GO:0004534;GO:0008270;GO:000367	BP:mRNA processing;CC:nucleus;MF:5'-3' exoribonuclease activity;MF:zinc ion binding;MF:nucleic acid binding;	cmt;K12619	;XRN2, RAT1	map03018;map03008	RNA degradation;Ribosome biogenesis in eukaryotes
FVER_04066	RBA16470.1	mRNA 3'-end-processing protein RNA14 [Fusarium proliferatum]	sp|Q4IR09|RNA14_GIBZE;	mRNA 3'-end-processing protein RNA14 OS=Gibberella zeae;	PF05843.15;PF13428.7	GO:0006397;GO:000563	BP:mRNA processing;CC:nucleus;	K14408	CSTF3, RNA14	map03015	mRNA surveillance pathway
FVER_04071	SCV32435.1	probable uracil-DNA glycosylase [Fusarium fujikuroi]	sp|O74834|UNG_SCHPO;	Uracil-DNA glycosylase OS=Schizosaccharomyces pombe;	PF03167.20	GO:0006284;GO:0005634;GO:0005739;GO:000484	BP:base-excision repair;CC:nucleus;CC:mitochondrion;MF:uracil DNA N-glycosylase activity;	K03648	UNG, UDG	map03410	Base excision repair
FVER_04097	AMD38891.1	translation elongation factor 1-alpha [Fusarium sacchari]	sp|P34825|EF1A_HYPJE;	Elongation factor 1-alpha OS=Hypocrea jecorina OX=51453 GN=tef1 PE=3 SV=1;	PF00009.28;PF03143.18;PF03144.26	GO:0003746;GO:0003924;GO:000552	MF:translation elongation factor activity;MF:GTPase activity;MF:GTP binding;	K03231	EEF1A	map03013	RNA transport
FVER_04146	XP_023425642.1	related to PRT1-translation initiation factor eIF3 subunit [Fusarium fujikuroi IMI 58289]	sp|Q7S464|EIF3B_NEUCR;	Eukaryotic translation initiation factor 3 subunit B OS=Neurospora crassa;	PF08662.12	GO:0001732;GO:0005852;GO:0016282;GO:0033290;GO:0031369;GO:000374	BP:formation of cytoplasmic translation initiation complex;CC:eukaryotic translation initiation factor 3 complex;CC:eukaryotic 43S preinitiation complex;CC:eukaryotic 48S preinitiation complex;MF:translation initiation factor binding;MF:translation initiation factor activity;	K03253	EIF3B	map03013	RNA transport
FVER_04166	XP_023430662.1	probable bifunctional histidine biosynthesis protein hishf [Fusarium fujikuroi IMI 58289]	sp|Q9P4P9|HIS5_EMENI;	Imidazole glycerol phosphate synthase hisHF OS=Emericella nidulans;	PF00977.22;PF00117.29;PF01174.20;PF07685.15	GO:0000105;GO:0006541;GO:0000107;GO:0016833;GO:000435	BP:histidine biosynthetic process;BP:glutamine metabolic process;MF:imidazoleglycerol-phosphate synthase activity;MF:oxo-acid-lyase activity;MF:glutaminase activity;	K01663	HIS7	map00340	Histidine metabolism
FVER_04178	KLP03871.1	QDE3 protein [Fusarium fujikuroi]	sp|Q09811|HUS2_SCHPO;	ATP-dependent DNA helicase hus2/rqh1 OS=Schizosaccharomyces pombe;	PF00270.30;PF00271.32;PF16124.6;PF09382.11;PF04851.16;PF00570.24	GO:0006310;GO:0006281;GO:0006260;GO:0003676;GO:0043138;GO:000552	BP:DNA recombination;BP:DNA repair;BP:DNA replication;MF:nucleic acid binding;MF:3'-5' DNA helicase activity;MF:ATP binding;	K10901	BLM, RECQL3, SGS1	map03440	Homologous recombination
FVER_04284	XP_018246417.1	DNA-directed RNA polymerase III subunit RPC8 [Fusarium oxysporum f. sp. lycopersici 4287]	sp|Q2T9X1|RPC8_BOVIN;	DNA-directed RNA polymerase III subunit RPC8 OS=Bos taurus OX=9913 GN=POLR3H PE=2 SV=1;	PF08292.13;PF03876.18	GO:0006351;GO:000389	BP:transcription, DNA-templated;MF:DNA-directed RNA polymerase activity;	K03022	RPC8, POLR3H	map03020	RNA polymerase
FVER_04336	XP_031081679.1	related to NPY1-NADH pyrophosphatase I of the Nudix family of hydrolases, has a peroxisomal targetin [Fusarium proliferatum ET1]	sp|Q9DCN1|NUD12_MOUSE;	Peroxisomal NADH pyrophosphatase NUDT12 OS=Mus musculus OX=10090 GN=Nudt12 PE=1 SV=1;	PF00293.29;PF09296.12;PF09297.12	GO:0016021;GO:0016787;GO:004687	CC:integral component of membrane;MF:hydrolase activity;MF:metal ion binding;	K03426	E3.6.1.22, NUDT12, nudC	map04146;map00760	Peroxisome;Nicotinate and nicotinamide metabolism
FVER_04337	RKL51253.1	DNA repair protein rhp54 [Fusarium proliferatum]	sp|P41410|RAD54_SCHPO;	DNA repair protein rhp54 OS=Schizosaccharomyces pombe;	PF00176.24;PF08658.11;PF00271.32;PF04851.16;PF00270.30;PF11496.9	GO:0016817;GO:000552	MF:hydrolase activity, acting on acid anhydrides;MF:ATP binding;	K10875	RAD54L, RAD54	map03440	Homologous recombination
FVER_04349	KLP05221.1	succinate-semialdehyde dehydrogenase [Fusarium fujikuroi]	sp|P38067|UGA2_YEAST;	Succinate-semialdehyde dehydrogenase [NAD;	PF00171.23	GO:001662	MF:oxidoreductase activity, acting on the aldehyde or oxo group of donors, NAD or NADP as acceptor;	K00135	gabD	map00250;map00310;map00760;map00350;map00650	Alanine, aspartate and glutamate metabolism;Lysine degradation;Nicotinate and nicotinamide metabolism;Tyrosine metabolism;Butanoate metabolism
FVER_04363	QGI71439.1	hypothetical protein CEK27_003768 [Fusarium fujikuroi]	sp|P42058|ALTA7_ALTAL;	Minor allergen Alt a 7 OS=Alternaria alternata OX=5599 GN=ALTA7 PE=1 SV=1;	PF03358.16;PF02525.18	GO:0003955;GO:001018	MF:NA;MF:FMN binding;	K03809	wrbA	map00130	Ubiquinone and other terpenoid-quinone biosynthesis
FVER_04371	XP_023425729.1	probable isocitrate dehydrogenase [Fusarium fujikuroi IMI 58289]	sp|O13302|IDH1_AJECA;	Isocitrate dehydrogenase [NAD] subunit 1, mitochondrial OS=Ajellomyces capsulatus OX=5037 GN=IDH1 PE=2 SV=1;	PF00180.21	GO:0006099;GO:0006102;GO:0005962;GO:0042645;GO:0005739;GO:0051287;GO:0000287;GO:000444	BP:tricarboxylic acid cycle;BP:isocitrate metabolic process;CC:mitochondrial isocitrate dehydrogenase comple;CC:mitochondrial nucleoid;CC:mitochondrion;MF:NAD binding;MF:magnesium ion binding;MF:isocitrate dehydrogenas;	K00030	IDH3	map00020	Citrate cycle (TCA cycle)
FVER_04391	XP_018746214.1	hypothetical protein FVEG_02604 [Fusarium verticillioides 7600]	sp|O74492|HIUH_SCHPO;	Probable 5-hydroxyisourate hydrolase OS=Schizosaccharomyces pombe;	------	------	------	K07127	uraH, pucM, hiuH	map00230	Purine metabolism
FVER_04436	CVK84460.1	probable L-arabinitol 4-dehydrogenase [Fusarium mangiferae]	sp|Q96V44|LAD_HYPJE;	L-arabinitol 4-dehydrogenase OS=Hypocrea jecorina OX=51453 GN=lad1 PE=1 SV=1;	PF08240.13;PF00107.27;PF16912.6	GO:005511	BP:oxidation-reduction process;	K00008	SORD, gutB	map00040;map00051	Pentose and glucuronate interconversions;Fructose and mannose metabolism
FVER_04475	XP_031066323.1	succinate-semialdehyde dehydrogenase [Fusarium oxysporum f. sp. cubense tropical race 4 54006]	sp|Q9US47|SSDH1_SCHPO;	Putative succinate-semialdehyde dehydrogenase C1002.12c [NAD;	PF00171.23	GO:0009450;GO:000477	BP:gamma-aminobutyric acid catabolic process;MF:succinate-semialdehyde dehydrogenas;	K00135	gabD	map00250;map00310;map00760;map00350;map00650	Alanine, aspartate and glutamate metabolism;Lysine degradation;Nicotinate and nicotinamide metabolism;Tyrosine metabolism;Butanoate metabolism
FVER_04557	KAF4473477.1	DNA-directed RNA polymerase I and III subunit RPAC2 [Fusarium agapanthi]	sp|P28000|RPAC2_YEAST;	DNA-directed RNA polymerases I and III subunit RPAC2 OS=Saccharomyces cerevisiae;	PF13656.7;PF01193.25	GO:0006351;GO:0003899;GO:0046983;GO:000367	BP:transcription, DNA-templated;MF:DNA-directed RNA polymerase activity;MF:protein dimerization activity;MF:DNA binding;	K03020	RPC19, POLR1D	map03020	RNA polymerase
FVER_04646	XP_018245247.1	prolyl-tRNA synthetase [Fusarium oxysporum f. sp. lycopersici 4287]	sp|P38708|YHI0_YEAST;	Putative proline--tRNA ligase YHR020W OS=Saccharomyces cerevisiae;	PF09180.12;PF00587.26;PF03129.21	GO:0006433;GO:0005737;GO:0004827;GO:000552	BP:prolyl-tRNA aminoacylation;CC:cytoplasm;MF:proline-tRNA ligase activity;MF:ATP binding;	K01881	PARS, proS	map00970	Aminoacyl-tRNA biosynthesis
FVER_04650	CVK83137.1	probable carbamoyl-phosphate synthase (glutamine-hydrolyzing) arginine-specific large chain [Fusarium mangiferae]	sp|O94313|CARB_SCHPO;	Carbamoyl-phosphate synthase arginine-specific large chain OS=Schizosaccharomyces pombe;	PF02786.18;PF02787.20;PF02222.23;PF07478.14;PF15632.7	GO:0006807;GO:0046872;GO:000552	BP:nitrogen compound metabolic process;MF:metal ion binding;MF:ATP binding;	K01955	carB, CPA2	map00240;map00250	Pyrimidine metabolism;Alanine, aspartate and glutamate metabolism
FVER_04691	XP_023424780.1	RAD13-like protein [Fusarium fujikuroi IMI 58289]	sp|P28706|RAD13_SCHPO;	DNA repair protein rad13 OS=Schizosaccharomyces pombe;	PF00752.18;PF00867.19;PF02809.21	GO:0006289;GO:0005634;GO:0004519;GO:000369	BP:nucleotide-excision repair;CC:nucleus;MF:endonuclease activity;MF:single-stranded DNA binding;	nhe;K10846	;ERCC5, XPG, RAD2	map03420	Nucleotide excision repair
FVER_04792	KAF4336614.1	60s ribosomal l7 [Fusarium beomiforme]	sp|Q7SBD5|RL7_NEUCR;	60S ribosomal protein L7 OS=Neurospora crassa;	PF08079.13;PF00327.21	GO:0000463;GO:0022625;GO:000373	BP:maturation of LSU-rRNA from tricistronic rRNA transcrip;CC:cytosolic large ribosomal subunit;MF:structural constituent of ribosome;	K02937	RP-L7e, RPL7	map03010	Ribosome
FVER_04822	QGI79035.1	hypothetical protein CEK25_005764 [Fusarium fujikuroi]	sp|O43102|CBF5_ASPFU;	H/ACA ribonucleoprotein complex subunit cbf5 OS=Neosartorya fumigata;	PF08068.13;PF01509.19;PF16198.6;PF01472.21	GO:0006396;GO:0001522;GO:0003723;GO:000998	BP:RNA processing;BP:pseudouridine synthesis;MF:RNA binding;MF:pseudouridine synthase activity;	K11131	DKC1, NOLA4, CBF5	map03008	Ribosome biogenesis in eukaryotes
FVER_04906	CVK99412.1	related to quinic acid utilisation protein QUTG (inositol-1(or 4)-monophosphatase) [Fusarium mangiferae]	sp|P25416|QUTG_EMENI;	Protein qutG OS=Emericella nidulans;	PF00459.26	GO:0006021;GO:0046854;GO:0046855;GO:0008934;GO:0052832;GO:0052833;GO:004687	BP:inositol biosynthetic process;BP:phosphatidylinositol phosphorylation;BP:inositol phosphate dephosphorylation;MF:inositol monophosphate 1-phosphatase activity;MF:inositol monophosphate 3-phosphatase activity;MF:inositol monophosphate 4-phosphatase activity;MF:metal ion binding;	K01092	E3.1.3.25, IMPA, suhB	map04070;map00562	Phosphatidylinositol signaling system;Inositol phosphate metabolism
FVER_04978	KLO80814.1	dna-dependent rna polymerase I subunit a43 (rpa43) [Fusarium fujikuroi]	sp|P46669|RPA43_YEAST;	DNA-directed RNA polymerase I subunit RPA43 OS=Saccharomyces cerevisiae;	PF17875.2	GO:000389	MF:DNA-directed RNA polymerase activity;	K03004	RPA43	map03020	RNA polymerase
FVER_05040	KAF4424526.1	malate synthase glyoxysomal [Fusarium acutatum]	sp|P28345|MASY_NEUCR;	Malate synthase, glyoxysomal OS=Neurospora crassa;	PF01274.23	GO:0006099;GO:0006097;GO:000447	BP:tricarboxylic acid cycle;BP:glyoxylate cycle;MF:malate synthase activity;	K01638	aceB, glcB	map00630;map00620	Glyoxylate and dicarboxylate metabolism;Pyruvate metabolism
FVER_05057	KLO96422.1	replication factor C protein [Fusarium fujikuroi]	sp|O60182|RFC1_SCHPO;	Replication factor C subunit 1 OS=Schizosaccharomyces pombe;	PF08519.13;PF00533.27;PF00004.30;PF03215.16	GO:0006281;GO:0006260;GO:0005634;GO:0005663;GO:0003689;GO:000552	BP:DNA repair;BP:DNA replication;CC:nucleus;CC:DNA replication factor C complex;MF:DNA clamp loader activity;MF:ATP binding;	K10754	RFC1	map03430;map03420;map03030	Mismatch repair;Nucleotide excision repair;DNA replication
FVER_05061	KAF4444571.1	pre-mRNA-splicing factor RSE1 [Fusarium acutatum]	sp|Q52E49|RSE1_MAGO7;	Pre-mRNA-splicing factor RSE1 OS=Magnaporthe oryzae;	PF10433.10;PF03178.16	GO:0005634;GO:000367	CC:nucleus;MF:nucleic acid binding;	K12830	SF3B3, SAP130, RSE1	map03040	Spliceosome
FVER_05076	RBA15721.1	hypothetical protein FPRO05_12328 [Fusarium proliferatum]	sp|P55664|Y4TJ_SINFN;	Putative threonine dehydratase OS=Sinorhizobium fredii;	PF00291.26	------	------	K01754	E4.3.1.19, ilvA, tdcB	map00260;map00290	Glycine, serine and threonine metabolism;Valine, leucine and isoleucine biosynthesis
FVER_05113	XP_023427994.1	related to TIP41-negatively regulates the TOR signaling pathway [Fusarium fujikuroi IMI 58289]	sp|Q12199|TIP41_YEAST;	Type 2A phosphatase activator TIP41 OS=Saccharomyces cerevisiae;	PF04176.14	GO:004366	BP:regulation of phosphoprotein phosphatase activity;	K17607	TIPRL, TIP41	map04138	Autophagy - yeast
FVER_05184	RKL40613.1	Nuclear GTP-binding protein NUG1 [Fusarium proliferatum]	sp|P40010|NUG1_YEAST;	Nuclear GTP-binding protein NUG1 OS=Saccharomyces cerevisiae;	PF08701.12;PF01926.24;PF03193.17;PF00009.28	GO:000552	MF:GTP binding;	K14538	NUG1, GNL3	map03008	Ribosome biogenesis in eukaryotes
FVER_05234	KAF4424265.1	glycine dehydrogenase [Fusarium acutatum]	sp|Q8DII3|GCSP_THEEB;	Glycine dehydrogenase;	PF02347.17;PF01212.22;PF00266.20	GO:0006546;GO:0005739;GO:000437	BP:glycine catabolic process;CC:mitochondrion;MF:glycine dehydrogenas;	K00281	GLDC, gcvP	map00630;map00260	Glyoxylate and dicarboxylate metabolism;Glycine, serine and threonine metabolism
FVER_05253	RYC83392.1	hypothetical protein BFJ63_vAg13716 [Fusarium oxysporum f. sp. narcissi]	sp|Q54FR4|PX24D_DICDI;	PXMP2/4 family protein 4 OS=Dictyostelium discoideum OX=44689 GN=DDB_G0290631 PE=3 SV=1;	PF04117.13	GO:001602	CC:integral component of membrane;	K13348	MPV17	map04146	Peroxisome
FVER_05273	XP_018240231.1	eukaryotic translation initiation factor 3 subunit I [Fusarium oxysporum f. sp. lycopersici 4287]	sp|Q7RXH4|EIF3I_NEUCR;	Eukaryotic translation initiation factor 3 subunit I OS=Neurospora crassa;	PF00400.33;PF12894.8	GO:0001732;GO:0033290;GO:0005852;GO:0016282;GO:000374	BP:formation of cytoplasmic translation initiation complex;CC:eukaryotic 48S preinitiation complex;CC:eukaryotic translation initiation factor 3 complex;CC:eukaryotic 43S preinitiation complex;MF:translation initiation factor activity;	K03246	EIF3I	map03013	RNA transport
FVER_05306	RKL26726.1	hypothetical protein BFJ72_g13593 [Fusarium proliferatum]	sp|Q04500|UTP14_YEAST;	U3 small nucleolar RNA-associated protein 14 OS=Saccharomyces cerevisiae;	PF04615.14	GO:0006364;GO:003204	BP:rRNA processing;CC:small-subunit processome;	K14567	UTP14	map03008	Ribosome biogenesis in eukaryotes
FVER_05319	CVK82962.1	probable eukaryotic translation initiation factor 3 subunit 7 homolog [Fusarium mangiferae]	sp|A4RFH6|EIF3D_MAGO7;	Eukaryotic translation initiation factor 3 subunit D OS=Magnaporthe oryzae;	PF05091.13	GO:0001732;GO:0002191;GO:0005852;GO:0016282;GO:0033290;GO:0098808;GO:000374	BP:formation of cytoplasmic translation initiation complex;BP:cap-dependent translational initiation;CC:eukaryotic translation initiation factor 3 complex;CC:eukaryotic 43S preinitiation complex;CC:eukaryotic 48S preinitiation complex;MF:mRNA cap binding;MF:translation initiation factor activity;	K03251	EIF3D	map03013	RNA transport
FVER_05375	CVK84308.1	uncharacterized protein FMAN_01395 [Fusarium mangiferae]	sp|O13904|MUG84_SCHPO;	Meiotically up-regulated gene 84 protein OS=Schizosaccharomyces pombe;	PF01544.19	GO:001602	CC:integral component of membrane;	K20178;K03861	VPS8;PIGP, GPI19, DSCR5	map00563;map04138	Glycosylphosphatidylinositol (GPI)-anchor biosynthesis;Autophagy - yeast
FVER_05406	CVK87264.1	probable leucine--tRNA ligase, cytosolic [Fusarium mangiferae]	sp|P10857|SYLC_NEUCR;	Leucine--tRNA ligase, cytoplasmic OS=Neurospora crassa;	PF00133.23;PF09334.12;PF08264.14;PF01406.20	GO:0006429;GO:0005524;GO:0002161;GO:000482	BP:leucyl-tRNA aminoacylation;MF:ATP binding;MF:aminoacyl-tRNA editing activity;MF:leucine-tRNA ligase activity;	K01869	LARS, leuS	map00970	Aminoacyl-tRNA biosynthesis
FVER_05418	XP_031067217.1	uncharacterized protein FOIG_05155 [Fusarium oxysporum f. sp. cubense tropical race 4 54006]	sp|Q13619|CUL4A_HUMAN;	Cullin-4A OS=Homo sapiens OX=9606 GN=CUL4A PE=1 SV=3;	PF00888.23;PF10557.10	GO:0006325;GO:0006974;GO:0006511;GO:0000781;GO:0005634;GO:0031625;GO:0004674;GO:000552	BP:chromatin organization;BP:cellular response to DNA damage stimulus;BP:ubiquitin-dependent protein catabolic process;CC:chromosome, telomeric region;CC:nucleus;MF:ubiquitin protein ligase binding;MF:protein serine/threonine kinase activity;MF:ATP binding;	K10609	CUL4	map04120;map03420	Ubiquitin mediated proteolysis;Nucleotide excision repair
FVER_05432	XP_018757606.1	seryl-tRNA synthetase [Fusarium verticillioides 7600]	sp|P07284|SYSC_YEAST;	Serine--tRNA ligase, cytoplasmic OS=Saccharomyces cerevisiae;	PF00587.26;PF02403.23	GO:0006434;GO:0010494;GO:0004828;GO:000552	BP:seryl-tRNA aminoacylation;CC:cytoplasmic stress granule;MF:serine-tRNA ligase activity;MF:ATP binding;	K01875	SARS, serS	map00970	Aminoacyl-tRNA biosynthesis
FVER_05528	KAF4424547.1	peroxiredoxin type-2 [Fusarium acutatum]	sp|Q9Y8B8|PRX5_PENCI;	Peroxiredoxin Pen c 3 OS=Penicillium citrinum OX=5077 PE=1 SV=1;	PF08534.11;PF00578.22	GO:0010038;GO:0034599;GO:0045454;GO:0005737;GO:0005623;GO:0004601;GO:0008379;GO:005192	BP:response to metal ion;BP:cellular response to oxidative stress;BP:cell redox homeostasis;CC:cytoplasm;CC:cell;MF:peroxidase activity;MF:thioredoxin peroxidase activity;MF:peroxiredoxin activity;	K14171	AHP1	map04122	Sulfur relay system
FVER_05563	XP_023424112.1	related to ribosomal protein S28B [Fusarium fujikuroi IMI 58289]	sp|Q7S6W5|RS28_NEUCR;	40S ribosomal protein S28 OS=Neurospora crassa;	PF01200.19;PF02597.21	GO:0006777;GO:0007017;GO:0006412;GO:0005840;GO:0005829;GO:0005869;GO:0019008;GO:0000166;GO:0003735;GO:003036	BP:Mo-molybdopterin cofactor biosynthetic process;BP:microtubule-based process;BP:translation;CC:ribosome;CC:cytosol;CC:dynactin complex;CC:molybdopterin synthase complex;MF:nucleotide binding;MF:structural constituent of ribosome;MF:molybdopterin synthase activity;	K21232	MOCS2A, CNXG	map04122	Sulfur relay system
FVER_05603	PNP75781.1	hypothetical protein FNYG_10859 [Fusarium nygamai]	sp|P11635|DHQA_NEUCR;	Quinate dehydrogenase OS=Neurospora crassa;	PF08501.12;PF18317.2	GO:000476	MF:shikimate 3-dehydrogenas;	K09484	QUIB, qa-3	map00400	Phenylalanine, tyrosine and tryptophan biosynthesis
FVER_05608	XP_018756527.1	ribonuclease P/MRP protein subunit RPP1 [Fusarium verticillioides 7600]	sp|P87120|RNP3_SCHPO;	Probable ribonuclease P protein subunit 3 OS=Schizosaccharomyces pombe;	PF01876.17	GO:0008033;GO:000452	BP:tRNA processing;MF:ribonuclease P activity;	K03539	RPP1, RPP30	map03008;map03013	Ribosome biogenesis in eukaryotes;RNA transport
FVER_05614	XP_018243605.1	imidazoleglycerol-phosphate dehydratase [Fusarium oxysporum f. sp. lycopersici 4287]	sp|Q9HEG3|HIS7_NEUCR;	Imidazoleglycerol-phosphate dehydratase OS=Neurospora crassa;	PF00475.19	GO:0000105;GO:000442	BP:histidine biosynthetic process;MF:imidazoleglycerol-phosphate dehydratase activity;	K01693	hisB	map00340	Histidine metabolism
FVER_05680	CVK89424.1	related to sister chromatid cohesion protein [Fusarium proliferatum]	sp|Q00333|NPBL_COPC7;	Protein rad9 OS=Coprinopsis cinerea;	PF12830.8;PF12765.8	GO:0010468;GO:0007049;GO:0005634;GO:000368	BP:regulation of gene expression;BP:cell cycle;CC:nucleus;MF:chromatin binding;	K06672	SCC2, NIPBL	map04111	Cell cycle - yeast
FVER_05724	KLO91121.1	adrenoleukodystrophy protein [Fusarium fujikuroi]	sp|F1RBC8|ABCD1_DANRE;	ATP-binding cassette sub-family D member 1 OS=Danio rerio OX=7955 GN=abcd1 PE=2 SV=1;	PF06472.16;PF00005.28;PF13304.7	GO:1902001;GO:0005779;GO:0042626;GO:0016887;GO:000552	BP:fatty acid transmembrane transport;CC:integral component of peroxisomal membrane;MF:ATPase activity, coupled to transmembrane movement of substances;MF:ATPase activity;MF:ATP binding;	K15628	PXA	map04146;map02010	Peroxisome;ABC transporters
FVER_05733	XP_031060083.1	CMGC/CDK/CDC2 protein kinase [Fusarium oxysporum f. sp. cubense tropical race 4 54006]	sp|P54119|CDK1_AJECA;	Cyclin-dependent kinase 1 OS=Ajellomyces capsulatus OX=5037 GN=CDC2 PE=3 SV=1;	PF00069.26;PF07714.18	GO:0004674;GO:000552	MF:protein serine/threonine kinase activity;MF:ATP binding;	K04563	CDC28, CDC2	map04111;map04113;map04011	Cell cycle - yeast;Meiosis - yeast;MAPK signaling pathway - yeast
FVER_05755	XP_023429165.1	probable Int-6 protein [Fusarium fujikuroi IMI 58289]	sp|Q7S519|EIF3E_NEUCR;	Eukaryotic translation initiation factor 3 subunit E OS=Neurospora crassa;	PF09440.11;PF01399.28	GO:0001732;GO:0071540;GO:0033290;GO:0016282;GO:000374	BP:formation of cytoplasmic translation initiation complex;CC:eukaryotic translation initiation factor 3 complex, eIF3e;CC:eukaryotic 48S preinitiation complex;CC:eukaryotic 43S preinitiation complex;MF:translation initiation factor activity;	K03250	EIF3E, INT6	map03013	RNA transport
FVER_05775	CVK88756.1	related to vesicular transport-associated repeat protein Tb-291 [Fusarium mangiferae]	sp|Q96EP1|CHFR_HUMAN;	E3 ubiquitin-protein ligase CHFR OS=Homo sapiens OX=9606 GN=CHFR PE=1 SV=2;	PF00097.26;PF13923.7;PF13445.7;PF00018.29;PF14835.7;PF13639.7;PF14604.7;PF14634.7;PF15227.7	GO:004687	MF:metal ion binding;	K01738	cysK	map00270;map00920	Cysteine and methionine metabolism;Sulfur metabolism
FVER_05821	KLP09775.1	Uncharacterized protein LW94_4815 [Fusarium fujikuroi]	sp|W8QRE4|XYL5_PHACH;	Beta-xylosidase OS=Phanerochaete chrysosporium OX=5306 GN=Xyl5 PE=1 SV=2;	PF00150.19	GO:0005975;GO:000455	BP:carbohydrate metabolic process;MF:hydrolase activity, hydrolyzing O-glycosyl compounds;	K01179	E3.2.1.4	map00500	Starch and sucrose metabolism
FVER_05831	XP_031035020.1	hexaprenyl pyrophosphate synthase, mitochondrial [Fusarium oxysporum NRRL 32931]	sp|Q7S565|COQ1_NEUCR;	Probable hexaprenyl pyrophosphate synthase, mitochondrial OS=Neurospora crassa;	PF00348.18	GO:0008299;GO:001674	BP:isoprenoid biosynthetic process;MF:transferase activity;	K05355	hexPS, COQ1	map00900	Terpenoid backbone biosynthesis
FVER_05840	CVK84556.1	probable D-lactate dehydrogenase (cytochrome) [Fusarium mangiferae]	sp|Q12627|DLD1_KLULA;	D-lactate dehydrogenase [cytochrome], mitochondrial OS=Kluyveromyces lactis;	PF02913.20;PF01565.24	GO:0016021;GO:0071949;GO:001649	CC:integral component of membrane;MF:FAD binding;MF:oxidoreductase activity;	K00102	LDHD, dld	map00620	Pyruvate metabolism
FVER_05860	XP_018753343.1	structural maintenance-chromosome 1 [Fusarium verticillioides 7600]	sp|O94383|SMC1_SCHPO;	Structural maintenance of chromosomes protein 1 OS=Schizosaccharomyces pombe;	PF02463.20;PF06470.14;PF13555.7;PF13304.7;PF12128.9	GO:0007064;GO:0005634;GO:0008278;GO:0046982;GO:0003682;GO:000552	BP:mitotic sister chromatid cohesion;CC:nucleus;CC:cohesin complex;MF:protein heterodimerization activity;MF:chromatin binding;MF:ATP binding;	K06636	SMC1	map04111;map04113	Cell cycle - yeast;Meiosis - yeast
FVER_05934	XP_018233568.1	adenine phosphoribosyltransferase [Fusarium oxysporum f. sp. lycopersici 4287]	sp|Q6CA53|APT_YARLI;	Adenine phosphoribosyltransferase OS=Yarrowia lipolytica;	PF00156.28	GO:0006168;GO:0009116;GO:0005737;GO:000399	BP:adenine salvage;BP:nucleoside metabolic process;CC:cytoplasm;MF:adenine phosphoribosyltransferase activity;	K00759	APRT, apt	map00230	Purine metabolism
FVER_05941	XP_018746310.1	asparagine synthetase [Fusarium verticillioides 7600]	sp|P78753|ASNS_SCHPO;	Probable asparagine synthetase [glutamine-hydrolyzing] OS=Schizosaccharomyces pombe;	PF00733.22;PF13537.7;PF13522.7;PF12481.9	GO:0006529;GO:0006541;GO:0005524;GO:000406	BP:asparagine biosynthetic process;BP:glutamine metabolic process;MF:ATP binding;MF:asparagine synthas;	K01953	asnB, ASNS	map00250	Alanine, aspartate and glutamate metabolism
FVER_05956	XP_009254954.1	hypothetical protein FPSE_03560 [Fusarium pseudograminearum CS3096]	sp|Q01112|CDC42_SCHPO;	Cell division control protein 42 homolog OS=Schizosaccharomyces pombe;	PF00071.23;PF08477.14;PF00025.22	GO:0007264;GO:0051301;GO:0003924;GO:000552	BP:small GTPase mediated signal transduction;BP:cell division;MF:GTPase activity;MF:GTP binding;	K04393	CDC42	map04144;map04011;map04933	Endocytosis;MAPK signaling pathway - yeast;AGE-RAGE signaling pathway in diabetic complications
FVER_05973	XP_018249510.1	DNA-directed RNA polymerase I, II, and III subunit RPABC3 [Fusarium oxysporum f. sp. lycopersici 4287]	sp|P20436|RPAB3_YEAST;	DNA-directed RNA polymerases I, II, and III subunit RPABC3 OS=Saccharomyces cerevisiae;	PF03870.16;PF16992.6	GO:0006366;GO:0006383;GO:0005736;GO:0005665;GO:0005666;GO:000389	BP:transcription from RNA polymerase II promoter;BP:transcription from RNA polymerase III promoter;CC:DNA-directed RNA polymerase I complex;CC:DNA-directed RNA polymerase II, core complex;CC:DNA-directed RNA polymerase III complex;MF:DNA-directed RNA polymerase activity;	K03016	RPB8, POLR2H	map03020	RNA polymerase
FVER_06018	KAF4435504.1	glucosamine-phosphate N-acetyltransferase [Fusarium acutatum]	sp|O93806|GNA1_CANAX;	Glucosamine 6-phosphate N-acetyltransferase OS=Candida albicans OX=5476 GN=GNA1 PE=3 SV=1;	PF00583.26;PF13508.8;PF13673.8	GO:0006048;GO:000434	BP:UDP-N-acetylglucosamine biosynthetic process;MF:glucosamine 6-phosphate N-acetyltransferase activity;	K00621	GNPNAT1, GNA1	map00520	Amino sugar and nucleotide sugar metabolism
FVER_06051	CVL13693.1	probable branched chain alpha-keto acid dehydrogenase E1, beta subunit [Fusarium proliferatum]	sp|P9WF02|ODBB_CHATD;	2-oxoisovalerate dehydrogenase subunit beta, mitochondrial OS=Chaetomium thermophilum;	PF02779.25;PF02780.21;PF17147.5	GO:0006351;GO:0005634;GO:0003824;GO:0003677;GO:0000981;GO:000827	BP:transcription, DNA-templated;CC:nucleus;MF:catalytic activity;MF:DNA binding;MF:RNA polymerase II transcription factor activity, sequence-specific DNA binding;MF:zinc ion binding;	K00167	BCKDHB, bkdA2	map00280;map00640	Valine, leucine and isoleucine degradation;Propanoate metabolism
FVER_06079	KLO91194.1	enoyl-CoA hydratase precursor, mitochondrial [Fusarium fujikuroi]	sp|Q4PEN0|FER4_USTMA;	Enoyl-CoA isomerase/hydratase fer4 OS=Ustilago maydis;	PF00378.21;PF16113.6	GO:000382	MF:catalytic activity;	K05607	AUH	map00280	Valine, leucine and isoleucine degradation
FVER_06138	QGI58767.1	hypothetical protein CEK27_000892 [Fusarium fujikuroi]	sp|P38009|PUR92_YEAST;	Bifunctional purine biosynthesis protein ADE17 OS=Saccharomyces cerevisiae;	PF01808.19;PF02142.23	GO:0006281;GO:0042025;GO:001649	BP:DNA repair;CC:host cell nucleus;MF:oxidoreductase activity;	K06662;K00602	HRAD17, RAD24;purH	map04111;map04113;map00230;map00670	Cell cycle - yeast;Meiosis - yeast;Purine metabolism;One carbon pool by folate
FVER_06153	XP_031079252.1	uncharacterized protein FPRO_06150 [Fusarium proliferatum ET1]	sp|O74418|SNUT3_SCHPO;	U4/U6.U5 tri-snRNP-associated protein 3-like protein C162.01c OS=Schizosaccharomyces pombe;	PF08648.13	GO:0008380;GO:001602	BP:RNA splicing;CC:integral component of membrane;	K12846	SNRNP27	map03040	Spliceosome
FVER_06185	XP_023433451.1	probable phenylalanine--tRNA ligase alpha chain [Fusarium fujikuroi IMI 58289]	sp|O42849|SYFB_SCHPO;	Phenylalanine--tRNA ligase beta subunit OS=Schizosaccharomyces pombe;	PF17759.2;PF18262.2;PF03483.18;PF03484.16	GO:0006432;GO:0005737;GO:0004826;GO:0000287;GO:0003723;GO:000552	BP:phenylalanyl-tRNA aminoacylation;CC:cytoplasm;MF:phenylalanine-tRNA ligase activity;MF:magnesium ion binding;MF:RNA binding;MF:ATP binding;	K01890	FARSB, pheT	map00970	Aminoacyl-tRNA biosynthesis
FVER_06187	KAF4427974.1	heat shock SSB1 [Fusarium acutatum]	sp|G0SCU5|SSB1_CHATD;	Ribosome-associated molecular chaperone SSB1 OS=Chaetomium thermophilum;	PF00012.21;PF06723.14;PF02782.17	GO:0006452;GO:0006450;GO:0000054;GO:0051083;GO:0002181;GO:0042149;GO:0006415;GO:0006364;GO:0005844;GO:0005829;GO:0051082;GO:0005516;GO:0016887;GO:000552	BP:translational frameshifting;BP:regulation of translational fidelity;BP:ribosomal subunit export from nucleus;BP:'de novo' cotranslational protein folding;BP:cytoplasmic translation;BP:cellular response to glucose starvation;BP:translational termination;BP:rRNA processing;CC:polysome;CC:cytosol;MF:unfolded protein binding;MF:calmodulin binding;MF:ATPase activity;MF:ATP binding;	K03283	HSPA1s	map04213;map04144;map04141;map03040	Longevity regulating pathway - multiple species;Endocytosis;Protein processing in endoplasmic reticulum;Spliceosome
FVER_06241	CVK94059.1	related to transcription activator protein acu-15 [Fusarium mangiferae]	sp|Q9UUH3|MUG58_SCHPO;	Uncharacterized kinase mug58 OS=Schizosaccharomyces pombe;	PF04082.19	GO:0006351;GO:0005634;GO:0008270;GO:000367	BP:transcription, DNA-templated;CC:nucleus;MF:zinc ion binding;MF:DNA binding;	K15918	GLYK	map00630;map00561;map00260	Glyoxylate and dicarboxylate metabolism;Glycerolipid metabolism;Glycine, serine and threonine metabolism
FVER_06247	CVK84531.1	related to cell division control protein CDC91 [Fusarium mangiferae]	sp|Q8CHJ0|PIGU_CRIGR;	Phosphatidylinositol glycan anchor biosynthesis class U protein OS=Cricetulus griseus OX=10029 GN=PIGU PE=1 SV=3;	PF06728.14;PF05007.14	GO:0016255;GO:0051301;GO:004276	BP:attachment of GPI anchor to protein;BP:cell division;CC:GPI-anchor transamidase complex;	K05293	PIGU	map00563	Glycosylphosphatidylinositol (GPI)-anchor biosynthesis
FVER_06313	XP_023424861.1	probable aldehyde dehydrogenase [Fusarium fujikuroi IMI 58289]	sp|P40108|ALDH_DAVTA;	Aldehyde dehydrogenase OS=Davidiella tassiana OX=29918 GN=CLAH10 PE=1 SV=2;	PF00171.23	GO:001662	MF:oxidoreductase activity, acting on the aldehyde or oxo group of donors, NAD or NADP as acceptor;	K00128	ALDH	map00310;map00561;map00340;map00330;map00053;map00380;map00010;map00620;map00071;map00280;map00410	Lysine degradation;Glycerolipid metabolism;Histidine metabolism;Arginine and proline metabolism;Ascorbate and aldarate metabolism;Tryptophan metabolism;Glycolysis / Gluconeogenesis;Pyruvate metabolism;Fatty acid degradation;Valine, leucine and isoleucine degradation;beta-Alanine metabolism
FVER_06367	XP_018743689.1	hypothetical protein FVEG_01088 [Fusarium verticillioides 7600]	sp|A5PJL1|PXMP4_BOVIN;	Peroxisomal membrane protein 4 OS=Bos taurus OX=9913 GN=PXMP4 PE=2 SV=1;	PF02466.20	------	------	K13350	PXMP4, PMP24	map04146	Peroxisome
FVER_06389	XP_023426207.1	related to histidine triad protein member [Fusarium fujikuroi IMI 58289]	sp|Q9P7C9|DCPS_SCHPO;	m7GpppX diphosphatase OS=Schizosaccharomyces pombe;	PF05652.13;PF11969.9	GO:0000290;GO:001678	BP:deadenylation-dependent decapping of nuclear-transcribed mRNA;MF:hydrolase activity;	K12584	DCPS, DCS	map03018	RNA degradation
FVER_06404	QGI83078.1	hypothetical protein CEK25_009807 [Fusarium fujikuroi]	sp|O74430|TGCE1_SCHPO;	Probable lipase C1672.09 OS=Schizosaccharomyces pombe;	PF00561.21;PF04083.17;PF12146.9	GO:0035556;GO:0016021;GO:0016787;GO:000508	BP:intracellular signal transduction;CC:integral component of membrane;MF:hydrolase activity;MF:guanyl-nucleotide exchange factor activity;	K01052	LIPA	map00100	Steroid biosynthesis
FVER_06407	XP_031081945.1	probable ATP-binding protein PRP16 [Fusarium proliferatum ET1]	sp|O42945|DHX15_SCHPO;	Probable pre-mRNA-splicing factor ATP-dependent RNA helicase prp43 OS=Schizosaccharomyces pombe;	PF07717.17;PF04408.24;PF00271.32;PF00270.30;PF13401.7;PF00448.23	GO:0000390;GO:0000462;GO:0000463;GO:0000466;GO:0071014;GO:0003676;GO:0004386;GO:0003724;GO:000552	BP:spliceosomal complex disassembly;BP:maturation of SSU-rRNA from tricistronic rRNA transcrip;BP:maturation of LSU-rRNA from tricistronic rRNA transcrip;BP:maturation of 5.8S rRNA from tricistronic rRNA transcrip;CC:post-mRNA release spliceosomal complex;MF:nucleic acid binding;MF:helicase activity;MF:RNA helicase activity;MF:ATP binding;	K12820	DHX15, PRP43	map03040	Spliceosome
FVER_06428	CVK85288.1	probable aspartate aminotransferase, cytoplasmic [Fusarium proliferatum]	sp|O42652|AATC_SCHPO;	Aspartate aminotransferase, cytoplasmic OS=Schizosaccharomyces pombe;	PF00155.22	GO:0009058;GO:0006520;GO:0008483;GO:003017	BP:biosynthetic process;BP:cellular amino acid metabolic process;MF:transaminase activity;MF:pyridoxal phosphate binding;	K14454	GOT1	map00220;map00270;map00330;map00250;map00360;map00350;map00400	Arginine biosynthesis;Cysteine and methionine metabolism;Arginine and proline metabolism;Alanine, aspartate and glutamate metabolism;Phenylalanine metabolism;Tyrosine metabolism;Phenylalanine, tyrosine and tryptophan biosynthesis
FVER_06470	CVK87235.1	related to replication factor C chain Rfc3 [Fusarium mangiferae]	sp|O74111|RFC3_BLAAD;	Replication factor C subunit 3 OS=Blastobotrys adeninivorans OX=409370 GN=RFC3 PE=3 SV=1;	PF00004.30;PF08542.12;PF13177.7;PF03215.16;PF16193.6;PF13086.7;PF13401.7;PF13604.7;PF13191.7;PF07728.15;PF05496.13;PF13479.7;PF05673.14;PF06144.14;PF13245.7;PF07726.12	GO:0006260;GO:0005524;GO:000367	BP:DNA replication;MF:ATP binding;MF:DNA binding;	K10756	RFC3_5	map03430;map03420;map03030	Mismatch repair;Nucleotide excision repair;DNA replication
FVER_06543	QGI75275.1	hypothetical protein CEK25_000181 [Fusarium fujikuroi]	sp|O14232|MTR4_SCHPO;	ATP-dependent RNA helicase mtr4 OS=Schizosaccharomyces pombe;	PF13234.7;PF08148.13;PF00270.30;PF00271.32;PF04851.16	GO:0006401;GO:0003724;GO:0003723;GO:000552	BP:RNA catabolic process;MF:RNA helicase activity;MF:RNA binding;MF:ATP binding;	K12598	MTR4, SKIV2L2	map03018	RNA degradation
FVER_06549	PCD38027.1	hypothetical protein AU210_006516 [Fusarium oxysporum f. sp. radicis-cucumerinum]	sp|O74803|RHP23_SCHPO;	UV excision repair protein rhp23 OS=Schizosaccharomyces pombe;	PF00627.32;PF09280.12;PF00240.24;PF11976.9	GO:0043161;GO:0006289;GO:0042177;GO:0005634;GO:0042025;GO:0003684;GO:004313	BP:proteasome-mediated ubiquitin-dependent protein catabolic process;BP:nucleotide-excision repair;BP:negative regulation of protein catabolic process;CC:nucleus;CC:host cell nucleus;MF:damaged DNA binding;MF:ubiquitin binding;	cmt;K10839	;RAD23, HR23	map03420;map04141	Nucleotide excision repair;Protein processing in endoplasmic reticulum
FVER_06559	RKL37618.1	hypothetical protein BFJ72_g7703 [Fusarium proliferatum]	sp|P78750|UTP18_SCHPO;	Probable U3 small nucleolar RNA-associated protein 18 OS=Schizosaccharomyces pombe;	------	------	------	K16330;K14553	K16330;UTP18	map00240;map03008	Pyrimidine metabolism;Ribosome biogenesis in eukaryotes
FVER_06624	XP_023430749.1	related to translation initiation factor 3 (47 kDa subunit) [Fusarium fujikuroi IMI 58289]	sp|A4R0E5|EIF3F_MAGO7;	Eukaryotic translation initiation factor 3 subunit F OS=Magnaporthe oryzae;	PF13012.7;PF01398.22	GO:0001732;GO:0005852;GO:0016282;GO:0071541;GO:0071540;GO:0033290;GO:0031369;GO:000374	BP:formation of cytoplasmic translation initiation complex;CC:eukaryotic translation initiation factor 3 complex;CC:eukaryotic 43S preinitiation complex;CC:eukaryotic translation initiation factor 3 complex, eIF3m;CC:eukaryotic translation initiation factor 3 complex, eIF3e;CC:eukaryotic 48S preinitiation complex;MF:translation initiation factor binding;MF:translation initiation factor activity;	K03249	EIF3F	map03013	RNA transport
FVER_06641	KAF4498586.1	Vacuolar sorting-associated 8 like [Fusarium agapanthi]	sp|O13904|MUG84_SCHPO;	Meiotically up-regulated gene 84 protein OS=Schizosaccharomyces pombe;	PF08510.13	GO:001602	CC:integral component of membrane;	K20178;K03861	VPS8;PIGP, GPI19, DSCR5	map00563;map04138	Glycosylphosphatidylinositol (GPI)-anchor biosynthesis;Autophagy - yeast
FVER_06656	PNP75307.1	hypothetical protein FNYG_11450 [Fusarium nygamai]	sp|Q6BU46|SYNC_DEBHA;	Asparagine--tRNA ligase, cytoplasmic OS=Debaryomyces hansenii;	PF00152.21;PF01336.26	GO:0006421;GO:0005524;GO:000481	BP:asparaginyl-tRNA aminoacylation;MF:ATP binding;MF:asparagine-tRNA ligase activity;	K01893	NARS, asnS	map00970	Aminoacyl-tRNA biosynthesis
FVER_06657	CVK83776.1	probable methylmalonate-semialdehyde dehydrogenase (acylating) [Fusarium mangiferae]	sp|Q02253|MMSA_RAT;	Methylmalonate-semialdehyde dehydrogenase [acylating], mitochondrial OS=Rattus norvegicus OX=10116 GN=Aldh6a1 PE=1 SV=1;	PF00171.23	GO:000449	MF:methylmalonate-semialdehyde dehydrogenas;	K00140	mmsA, iolA, ALDH6A1	map00280;map00640;map00410;map00562	Valine, leucine and isoleucine degradation;Propanoate metabolism;beta-Alanine metabolism;Inositol phosphate metabolism
FVER_06708	RKL30739.1	2-methylisocitrate lyase [Fusarium proliferatum]	sp|G9NNY7|ACEB_HYPAI;	2-methylisocitrate lyase, mitochondrial OS=Hypocrea atroviridis;	PF00463.22;PF13714.7	GO:0019752;GO:0004451;GO:004687	BP:carboxylic acid metabolic process;MF:isocitrate lyase activity;MF:metal ion binding;	K01637	E4.1.3.1, aceA	map00630	Glyoxylate and dicarboxylate metabolism
FVER_06791	RBA10473.1	hypothetical protein FPRO05_05062 [Fusarium proliferatum]	sp|Q9D7Q1|CHIT1_MOUSE;	Chitotriosidase-1 OS=Mus musculus OX=10090 GN=Chit1 PE=1 SV=2;	PF00704.29;PF00187.20	GO:0005975;GO:000806	BP:carbohydrate metabolic process;MF:chitin binding;	K01183	E3.2.1.14	map00520	Amino sugar and nucleotide sugar metabolism
FVER_06813	KLP18925.1	glycerol-3-phosphate dehydrogenase precursor [Fusarium fujikuroi]	sp|Q64521|GPDM_MOUSE;	Glycerol-3-phosphate dehydrogenase, mitochondrial OS=Mus musculus OX=10090 GN=Gpd2 PE=1 SV=2;	PF01266.25;PF16901.6;PF00890.25;PF12831.8	GO:0006072;GO:0009331;GO:005259	BP:glycerol-3-phosphate metabolic process;CC:glycerol-3-phosphate dehydrogenase complex;MF:sn-glycerol-3-phosphat;	K00111	glpA, glpD	map00564	Glycerophospholipid metabolism
FVER_06858	XP_023433220.1	related to NUP170-nuclear pore protein [Fusarium fujikuroi IMI 58289]	sp|G0S7B6|NU170_CHATD;	Nucleoporin NUP170 OS=Chaetomium thermophilum;	PF08801.12;PF03177.15	GO:0005643;GO:001705	CC:nuclear pore;MF:structural constituent of nuclear pore;	K14312	NUP155, NUP170, NUP157	map03013	RNA transport
FVER_06860	XP_023427890.1	related to RSM26-mitochondrial ribosomal protein, small subunit [Fusarium fujikuroi IMI 58289]	sp|P47141|RT26_YEAST;	37S ribosomal protein S26, mitochondrial OS=Saccharomyces cerevisiae;	PF02777.19	GO:0005840;GO:0004784;GO:004687	CC:ribosome;MF:superoxide dismutase activity;MF:metal ion binding;	K04564	SOD2	map04213;map04146	Longevity regulating pathway - multiple species;Peroxisome
FVER_06936	XP_023425852.1	probable cig2 protein (putative GDP-GTP exchange factor) [Fusarium fujikuroi IMI 58289]	sp|C7Z638|MTNA_NECH7;	Methylthioribose-1-phosphate isomerase OS=Nectria haematococca;	PF01008.18	GO:0019509;GO:0019284;GO:0005737;GO:0005634;GO:004652	BP:L-methionine biosynthetic process from methylthioadenosine;BP:L-methionine biosynthetic process from S-adenosylmethionine;CC:cytoplasm;CC:nucleus;MF:S-methyl-5-thioribose-1-phosphate isomerase activity;	K08963	mtnA	map00270	Cysteine and methionine metabolism
FVER_06964	CVK97214.1	probable class I alpha mannosidase [Fusarium mangiferae]	sp|Q8H116|MNS2_ARATH;	Mannosyl-oligosaccharide 1,2-alpha-mannosidase MNS2 OS=Arabidopsis thaliana OX=3702 GN=MNS2 PE=1 SV=1;	PF01532.21	GO:0016192;GO:0008152;GO:0006886;GO:0016021;GO:0030117;GO:0004571;GO:000550	BP:vesicle-mediated transport;BP:metabolic process;BP:intracellular protein transport;CC:integral component of membrane;CC:membrane coat;MF:mannosyl-oligosaccharide 1,2-alpha-mannosidase activity;MF:calcium ion binding;	K01230	MAN1A_C, MNS1_2	map00510;map00513;map04141	N-Glycan biosynthesis;Various types of N-glycan biosynthesis;Protein processing in endoplasmic reticulum
FVER_06968	XP_023426750.1	probable ribosomal elongation factor EF-2 [Fusarium fujikuroi IMI 58289]	sp|O94316|SN114_SCHPO;	Pre-mRNA-splicing factor cwf10 OS=Schizosaccharomyces pombe;	PF00009.28;PF16004.6;PF03764.19;PF00679.25;PF03144.26;PF14492.7;PF01926.24	GO:0003746;GO:0003924;GO:000552	MF:translation elongation factor activity;MF:GTPase activity;MF:GTP binding;	K12852	EFTUD2	map03040	Spliceosome
FVER_06992	PNP84612.1	hypothetical protein FNYG_02241 [Fusarium nygamai]	sp|P21594|PYRF_HYPJE;	Orotidine 5'-phosphate decarboxylase OS=Hypocrea jecorina OX=51453 GN=ura3 PE=3 SV=1;	PF00215.25	GO:0044205;GO:0006207;GO:0006351;GO:0005634;GO:0008270;GO:0003677;GO:0004590;GO:000098	BP:'de novo' UMP biosynthetic process;BP:'de novo' pyrimidine nucleobase biosynthetic process;BP:transcription, DNA-templated;CC:nucleus;MF:zinc ion binding;MF:DNA binding;MF:orotidine-5'-phosphate decarboxylase activity;MF:RNA polymerase II transcription factor activity, sequence-specific DNA binding;	K13421	UMPS	map00240	Pyrimidine metabolism
FVER_07036	XP_023426053.1	probable D-amino-acid oxidase [Fusarium fujikuroi IMI 58289]	sp|P24552|OXDA_FUSSO;	D-amino-acid oxidase OS=Fusarium solani subsp. pisi OX=70791 PE=1 SV=1;	PF01266.25;PF13450.7;PF01946.18	GO:0046416;GO:0003884;GO:007194	BP:D-amino acid metabolic process;MF:D-amino-acid oxidase activity;MF:FAD binding;	K00273	DAO, aao	map00472;map00311;map00330;map00260;map04146	D-Arginine and D-ornithine metabolism;Penicillin and cephalosporin biosynthesis;Arginine and proline metabolism;Glycine, serine and threonine metabolism;Peroxisome
FVER_07084	CVK83250.1	related to DNA-directed RNA polymerase III chain RPC82 [Fusarium proliferatum]	sp|Q8WZW7|RPC3_NEUCR;	DNA-directed RNA polymerase III subunit rpc-3 OS=Neurospora crassa;	PF05645.14;PF08221.12	GO:0006351;GO:0005666;GO:0003899;GO:000369	BP:transcription, DNA-templated;CC:DNA-directed RNA polymerase III complex;MF:DNA-directed RNA polymerase activity;MF:single-stranded DNA binding;	K03023	RPC3, POLR3C	map03020	RNA polymerase
FVER_07188	XP_031077305.1	probable glycogen phosphorylase [Fusarium proliferatum ET1]	sp|P06738|PHSG_YEAST;	Glycogen phosphorylase OS=Saccharomyces cerevisiae;	PF00343.21	GO:0005975;GO:0102250;GO:0008184;GO:0030170;GO:010249	BP:carbohydrate metabolic process;MF:linear malto-oligosaccharide phosphorylase activity;MF:glycogen phosphorylase activity;MF:pyridoxal phosphate binding;MF:SHG alpha-glucan phosphorylase activity;	K00688	PYG, glgP	map00500	Starch and sucrose metabolism
FVER_07235	KAF4485683.1	translation initiation factor 5 [Fusarium agapanthi]	sp|Q09689|IF5_SCHPO;	Probable eukaryotic translation initiation factor 5 OS=Schizosaccharomyces pombe;	PF01873.18;PF02020.19	GO:000374	MF:translation initiation factor activity;	K03262	EIF5	map03013	RNA transport
FVER_07256	XP_031074952.1	related to recQ gene for DNA helicase [Fusarium proliferatum ET1]	sp|P54132|BLM_HUMAN;	Bloom syndrome protein OS=Homo sapiens OX=9606 GN=BLM PE=1 SV=1;	PF00270.30;PF00271.32;PF16124.6	GO:0006310;GO:0005634;GO:0003678;GO:0003676;GO:000552	BP:DNA recombination;CC:nucleus;MF:DNA helicase activity;MF:nucleic acid binding;MF:ATP binding;	K10901	BLM, RECQL3, SGS1	map03440	Homologous recombination
FVER_07272	KLO87176.1	putative DNA replication licensing factor (nimQ) [Fusarium fujikuroi]	sp|P40377|MCM2_SCHPO;	DNA replication licensing factor mcm2 OS=Schizosaccharomyces pombe;	PF00493.24;PF17207.4;PF12619.9;PF17855.2;PF14551.7;PF01078.22;PF07728.15	GO:1905775;GO:0000727;GO:0006270;GO:0006267;GO:0006271;GO:1902975;GO:0005737;GO:0042555;GO:0071162;GO:0005634;GO:0031298;GO:0005656;GO:0017116;GO:0003688;GO:0003677;GO:0003678;GO:0003682;GO:0003697;GO:000552	BP:negative regulation of DNA helicase activity;BP:double-strand break repair via break-induced replication;BP:DNA replication initiation;BP:pre-replicative complex assembly involved in nuclear cell cycle DNA replication;BP:DNA strand elongation involved in DNA replication;BP:mitotic DNA replication initiation;CC:cytoplasm;CC:MCM complex;CC:CMG complex;CC:nucleus;CC:replication fork protection co…	K02540	MCM2	map04111;map04113;map03030	Cell cycle - yeast;Meiosis - yeast;DNA replication
FVER_07279	XP_031074061.1	alanyl-tRNA synthetase [Fusarium oxysporum f. sp. cubense tropical race 4 54006]	sp|Q5AQL1|SYA_EMENI;	Alanine--tRNA ligase OS=Emericella nidulans;	PF01411.20;PF07973.15;PF02272.20	GO:0070143;GO:0005739;GO:0004813;GO:0000049;GO:0008270;GO:000552	BP:mitochondrial alanyl-tRNA aminoacylation;CC:mitochondrion;MF:alanine-tRNA ligase activity;MF:tRNA binding;MF:zinc ion binding;MF:ATP binding;	K01872	AARS, alaS	map00970	Aminoacyl-tRNA biosynthesis
FVER_07290	KAF4421235.1	Atypical RIO RIO2 kinase [Fusarium acutatum]	sp|Q9P7W5|RIO2_SCHPO;	Serine/threonine-protein kinase rio2 OS=Schizosaccharomyces pombe;	PF01163.23;PF09202.12;PF06293.15;PF01636.24	GO:0004674;GO:000552	MF:protein serine/threonine kinase activity;MF:ATP binding;	K07179	RIOK2	map03008	Ribosome biogenesis in eukaryotes
FVER_07340	XP_031081815.1	related to agmatinase [Fusarium proliferatum ET1]	sp|Q6CIB4|GBU1_KLULA;	Guanidinobutyrase OS=Kluyveromyces lactis;	PF00491.22	GO:0016813;GO:004687	MF:hydrolase activity, acting on carbon-nitroge;MF:metal ion binding;	K01480	speB	map00330	Arginine and proline metabolism
FVER_07363	XP_018759432.1	N1-acetylpolyamine oxidase [Fusarium verticillioides 7600]	sp|Q0J290|PAO7_ORYSJ;	Polyamine oxidase 7 OS=Oryza sativa subsp. japonica OX=39947 GN=PAO7 PE=1 SV=1;	PF01593.25;PF13450.7;PF07992.15;PF13738.7;PF01266.25;PF01262.22	GO:001649	MF:oxidoreductase activity;	K13366	MPAO, PAO1	map00330;map00410	Arginine and proline metabolism;beta-Alanine metabolism
FVER_07399	XP_018240584.1	hypothetical protein FOXG_05373 [Fusarium oxysporum f. sp. lycopersici 4287]	sp|O13910|MPP10_SCHPO;	U3 small nucleolar ribonucleoprotein protein mpp10 OS=Schizosaccharomyces pombe;	PF10516.10;PF13424.7;PF07719.18;PF13432.7	GO:0006364;GO:0005732;GO:003445	BP:rRNA processing;CC:small nucleolar ribonucleoprotein complex;CC:Mpp10 complex;	K14559	MPP10	map03008	Ribosome biogenesis in eukaryotes
FVER_07411	CVL04644.1	related to TRANSKETOLASE [Fusarium mangiferae]	sp|O93884|DAS_CANBO;	Dihydroxyacetone synthase OS=Candida boidinii OX=5477 GN=DAS1 PE=1 SV=3;	PF00456.22;PF02779.25;PF00676.21;PF13292.7;PF02780.21	GO:0004802;GO:000382	MF:transketolase activity;MF:catalytic activity;	K17100	DAS	map00680	Methane metabolism
FVER_07434	SCV25302.1	related to AAH1-adenosine deaminase [Fusarium fujikuroi]	sp|Q9P6J8|YHD2_SCHPO;	Uncharacterized deaminase C1683.02 OS=Schizosaccharomyces pombe;	PF00962.23	GO:0019239;GO:001649	MF:deaminase activity;MF:oxidoreductase activity;	K01488	add, ADA	map00230	Purine metabolism
FVER_07469	XP_023425746.1	related to PNG1-protein with de-N-glycosylation function (N-glycanase) [Fusarium fujikuroi IMI 58289]	sp|Q4IR87|PNG1_GIBZE;	Protein PNG1 OS=Gibberella zeae;	PF03835.16;PF01841.20	------	------	K01456	E3.5.1.52, NGLY1, PNG1	map04141	Protein processing in endoplasmic reticulum
FVER_07479	RKL43483.1	hypothetical protein BFJ72_g4307 [Fusarium proliferatum]	------	------	PF05132.15	GO:0006383;GO:0005666;GO:0003899;GO:000367	BP:transcription from RNA polymerase III promoter;CC:DNA-directed RNA polymerase III complex;MF:DNA-directed RNA polymerase activity;MF:DNA binding;	K03026	RPC4, POLR3D	map03020	RNA polymerase
FVER_07483	CVK89361.1	probable N-glycosylase/DNA lyase [Fusarium mangiferae]	sp|O15527|OGG1_HUMAN;	N-glycosylase/DNA lyase OS=Homo sapiens OX=9606 GN=OGG1 PE=1 SV=2;	PF07934.13;PF00730.26;PF00633.24	GO:0006284;GO:0006289;GO:0016829;GO:0003684;GO:000853	BP:base-excision repair;BP:nucleotide-excision repair;MF:lyase activity;MF:damaged DNA binding;MF:oxidized purine nucleobase lesion DNA N-glycosylase activity;	K03660	OGG1	map03410	Base excision repair
FVER_07499	RBA19402.1	homogentisate 1,2-dioxygenase [Fusarium proliferatum]	sp|Q00667|HGD_EMENI;	Homogentisate 1,2-dioxygenase OS=Emericella nidulans;	PF04209.14	GO:0006570;GO:0006559;GO:000441	BP:tyrosine metabolic process;BP:L-phenylalanine catabolic process;MF:homogentisate 1,2-dioxygenase activity;	K00451	HGD, hmgA	map00350	Tyrosine metabolism
FVER_07500	XP_023428246.1	related to DNA-directed RNA polymerase II regulator [Fusarium fujikuroi IMI 58289]	sp|Q9US06|PAF1_SCHPO;	RNA polymerase II-associated protein 1 homolog OS=Schizosaccharomyces pombe;	PF03985.14	GO:0016570;GO:0006368;GO:0016593;GO:000389	BP:histone modification;BP:transcription elongation from RNA polymerase II promoter;CC:Cdc73/Paf1 complex;MF:DNA-directed RNA polymerase activity;	K15174	PAF1	map04011	MAPK signaling pathway - yeast
FVER_07501	QGI63654.1	hypothetical protein CEK27_007625 [Fusarium fujikuroi]	sp|Q04430|PANK_YEAST;	Pantothenate kinase CAB1 OS=Saccharomyces cerevisiae;	PF03630.15	GO:0015937;GO:0004594;GO:000552	BP:coenzyme A biosynthetic process;MF:pantothenate kinase activity;MF:ATP binding;	K09680	coaW	map00770	Pantothenate and CoA biosynthesis
FVER_07542	XP_031075440.1	related to protein-tyrosine-phosphatase [Fusarium proliferatum ET1]	sp|P30303|MPIP_EMENI;	M-phase inducer phosphatase OS=Emericella nidulans;	PF00581.21	GO:1902751;GO:000472	BP:positive regulation of cell cycle G2/M phase transition;MF:protein tyrosine phosphatase activity;	K02555	MIH1	map04111;map04011	Cell cycle - yeast;MAPK signaling pathway - yeast
FVER_07596	QGI62602.1	hypothetical protein CEK27_006573 [Fusarium fujikuroi]	sp|Q05506|SYRC_YEAST;	Arginine--tRNA ligase, cytoplasmic OS=Saccharomyces cerevisiae;	PF00750.20;PF05746.16;PF03485.17	GO:0006420;GO:0005737;GO:0004814;GO:000552	BP:arginyl-tRNA aminoacylation;CC:cytoplasm;MF:arginine-tRNA ligase activity;MF:ATP binding;	K01887	RARS, argS	map00970	Aminoacyl-tRNA biosynthesis
FVER_07633	CVK90683.1	probable GUT1-glycerol kinase [Fusarium mangiferae]	sp|Q54VT8|GLPK_DICDI;	Probable glycerol kinase OS=Dictyostelium discoideum OX=44689 GN=gk PE=3 SV=1;	PF02782.17;PF00370.22	GO:0005975;GO:0006072;GO:000437	BP:carbohydrate metabolic process;BP:glycerol-3-phosphate metabolic process;MF:glycerol kinase activity;	K00864	glpK, GK	map00561	Glycerolipid metabolism
FVER_07699	EGU75468.1	hypothetical protein FOXB_14016 [Fusarium oxysporum Fo5176]	sp|O13903|RRP40_SCHPO;	Exosome complex component rrp40 OS=Schizosaccharomyces pombe;	PF18311.2;PF15985.6	GO:0016021;GO:000367	CC:integral component of membrane;MF:nucleic acid binding;	K03681	RRP40, EXOSC3	map03018	RNA degradation
FVER_07707	RBA17155.1	origin recognition complex subunit 4 [Fusarium proliferatum]	sp|Q9Y794|ORC4_SCHPO;	Origin recognition complex subunit 4 OS=Schizosaccharomyces pombe;	PF14629.7;PF13191.7;PF13831.7;PF00628.30;PF13401.7;PF00004.30;PF05729.13;PF13245.7;PF07693.15;PF02318.17;PF13604.7;PF01637.19;PF00931.23;PF13173.7	GO:0006260;GO:0005634;GO:0000808;GO:0046872;GO:000367	BP:DNA replication;CC:nucleus;CC:origin recognition complex;MF:metal ion binding;MF:DNA binding;	K02606	ORC4	map04111;map04113	Cell cycle - yeast;Meiosis - yeast
FVER_07744	XP_023429162.1	related to UTP6-U3 snoRNP protein [Fusarium fujikuroi IMI 58289]	sp|O60188|UTP6_SCHPO;	U3 small nucleolar RNA-associated protein 6 OS=Schizosaccharomyces pombe;	PF08640.12;PF08424.11	GO:0000462;GO:003051	BP:maturation of SSU-rRNA from tricistronic rRNA transcrip;MF:snoRNA binding;	K14557	UTP6	map03008	Ribosome biogenesis in eukaryotes
FVER_07804	RBA18998.1	hypothetical protein FPRO05_09927 [Fusarium proliferatum]	sp|P46948|RRP41_YEAST;	Exosome complex component SKI6 OS=Saccharomyces cerevisiae;	PF01138.22	GO:000452	MF:exonuclease activity;	K11600	RRP41, EXOSC4, SKI6	map03018	RNA degradation
FVER_07858	CVK99672.1	probable developmental regulator flbA [Fusarium mangiferae]	sp|P38093|FLBA_EMENI;	Developmental regulator flbA OS=Emericella nidulans;	PF00615.20;PF00610.22	GO:003555	BP:intracellular signal transduction;	K19838	SST2	map04011	MAPK signaling pathway - yeast
FVER_07912	XP_031067776.1	uncharacterized protein FOIG_04198 [Fusarium oxysporum f. sp. cubense tropical race 4 54006]	sp|G0S4X2|NUP49_CHATD;	Nucleoporin NUP49 OS=Chaetomium thermophilum;	PF13634.7	GO:0005643;GO:0017056;GO:000813	CC:nuclear pore;MF:structural constituent of nuclear pore;MF:nuclear localization sequence binding;	K14307	NUPL1, NUP49	map03013	RNA transport
FVER_07997	CVK87278.1	probable 4-hydroxyphenylpyruvate dioxygenase [Fusarium mangiferae]	sp|Q872T7|HPPD_NEUCR;	4-hydroxyphenylpyruvate dioxygenase OS=Neurospora crassa;	PF00903.26;PF13669.7	GO:0009072;GO:0003868;GO:004687	BP:aromatic amino acid family metabolic process;MF:4-hydroxyphenylpyruvate dioxygenase activity;MF:metal ion binding;	K00457	HPD, hppD	map00130;map00360;map00350	Ubiquinone and other terpenoid-quinone biosynthesis;Phenylalanine metabolism;Tyrosine metabolism
FVER_08007	XP_031050457.1	DASH complex subunit DAM1 [Fusarium oxysporum NRRL 32931]	sp|Q9P370|BUD20_SCHPO;	Zinc finger protein bud20 OS=Schizosaccharomyces pombe;	PF12171.9	GO:0008608;GO:0042729;GO:0072686;GO:0008270;GO:000367	BP:attachment of spindle microtubules to kinetochore;CC:DASH complex;CC:mitotic spindle;MF:zinc ion binding;MF:nucleic acid binding;	K02307;K14821	DAM1;BUD20	map04111	Cell cycle - yeast
FVER_08045	XP_023430437.1	related to general amidase [Fusarium fujikuroi IMI 58289]	sp|Q12559|AMDS_ASPOR;	Acetamidase OS=Aspergillus oryzae;	PF01425.22	------	------	K01426	E3.5.1.4, amiE	map00360;map00330;map00380	Phenylalanine metabolism;Arginine and proline metabolism;Tryptophan metabolism
FVER_08095	XP_023428170.1	probable farnesyl-pyrophosphate synthetase [Fusarium fujikuroi IMI 58289]	sp|Q92235|FPPS_GIBFU;	Farnesyl pyrophosphate synthase OS=Gibberella fujikuroi OX=5127 GN=FPPS PE=3 SV=1;	PF00348.18	GO:0045337;GO:0008299;GO:0033384;GO:0005737;GO:0004161;GO:0016765;GO:0004337;GO:004687	BP:farnesyl diphosphate biosynthetic process;BP:isoprenoid biosynthetic process;BP:geranyl diphosphate biosynthetic process;CC:cytoplasm;MF:dimethylallyltranstransferase activity;MF:transferase activity, transferring alkyl or ary;MF:geranyltranstransferase activity;MF:metal ion binding;	K00787	FDPS	map00900	Terpenoid backbone biosynthesis
FVER_08282	KLO79305.1	hydroxymethylglutaryl-CoA lyase [Fusarium fujikuroi]	sp|Q9I2A0|LIUE_PSEAE;	3-hydroxy-3-isohexenylglutaryl-CoA/hydroxy-methylglutaryl-CoA lyase OS=Pseudomonas aeruginosa;	PF00682.20	GO:1902600;GO:0046034;GO:0033180;GO:0016829;GO:0003824;GO:000552	BP:hydrogen ion transmembrane transport;BP:ATP metabolic process;CC:proton-transporting V-type ATPase, V1 domain;MF:lyase activity;MF:catalytic activity;MF:ATP binding;	K01640	E4.1.3.4, HMGCL, hmgL	map04146;map00280;map00072;map00650	Peroxisome;Valine, leucine and isoleucine degradation;Synthesis and degradation of ketone bodies;Butanoate metabolism
FVER_08285	PNP76084.1	hypothetical protein FNYG_10642 [Fusarium nygamai]	sp|O74916|YJ75_SCHPO;	Peptidase M20 domain-containing protein C757.05c OS=Schizosaccharomyces pombe;	PF13489.7;PF13847.7;PF13649.7;PF08241.13;PF08242.13;PF05175.15	GO:0032259;GO:000816	BP:methylation;MF:methyltransferase activity;	K01438	argE	map00220	Arginine biosynthesis
FVER_08299	XP_023435707.1	probable glutamate dehydrogenase, NAD(+)-specific [Fusarium fujikuroi IMI 58289]	sp|P00365|DHE2_NEUCR;	NAD-specific glutamate dehydrogenase OS=Neurospora crassa;	PF00208.22;PF05088.13	GO:0019551;GO:000435	BP:glutamate catabolic process to 2-oxoglutarate;MF:glutamate dehydrogenas;	K15371	GDH2	map00220;map00250;map00910;map00430	Arginine biosynthesis;Alanine, aspartate and glutamate metabolism;Nitrogen metabolism;Taurine and hypotaurine metabolism
FVER_08320	XP_018756480.1	hypothetical protein FVEG_09554 [Fusarium verticillioides 7600]	sp|A0A1D8PNZ7|GDE1_CANAL;	Glycerophosphocholine phosphodiesterase GDE1 OS=Candida albicans;	PF03009.18;PF12796.8;PF13637.7;PF00023.31;PF13857.7;PF03105.20;PF13606.7	GO:0046475;GO:004738	BP:glycerophospholipid catabolic process;MF:glycerophosphocholine phosphodiesterase activity;	K18696	GDE1	map00564	Glycerophospholipid metabolism
FVER_08379	XP_023425492.1	probable GFA1-glucosamine--fructose-6-phosphate transaminase [Fusarium fujikuroi IMI 58289]	sp|P14742|GFA1_YEAST;	Glutamine--fructose-6-phosphate aminotransferase [isomerizing] OS=Saccharomyces cerevisiae;	PF01380.23;PF13522.7;PF13537.7;PF13230.7	GO:1901137;GO:0097367;GO:000436	BP:carbohydrate derivative biosynthetic process;MF:carbohydrate derivative binding;MF:glutamine-fructose-6-phosphate transaminas;	K00820	glmS, GFPT	map00520;map00250	Amino sugar and nucleotide sugar metabolism;Alanine, aspartate and glutamate metabolism
FVER_08396	XP_018759338.1	hypothetical protein FVEG_11633 [Fusarium verticillioides 7600]	sp|Q12460|NOP56_YEAST;	Nucleolar protein 56 OS=Saccharomyces cerevisiae;	PF01798.19;PF08156.14	GO:0005975;GO:0008061;GO:000455	BP:carbohydrate metabolic process;MF:chitin binding;MF:hydrolase activity, hydrolyzing O-glycosyl compounds;	K14564	NOP56	map03008	Ribosome biogenesis in eukaryotes
FVER_08397	RBA12303.1	DNA repair protein RAD50 [Fusarium proliferatum]	sp|Q9UTJ8|RAD50_SCHPO;	DNA repair protein rad50 OS=Schizosaccharomyces pombe;	PF13476.7;PF13304.7;PF13558.7;PF13175.7;PF05667.12;PF13166.7	GO:0000723;GO:0006281;GO:0030870;GO:001688	BP:telomere maintenance;BP:DNA repair;CC:Mre11 complex;MF:ATPase activity;	nhe;K10866	;RAD50	map03450;map03440	Non-homologous end-joining;Homologous recombination
FVER_08456	XP_018244945.1	DNA-directed RNA polymerase I subunit RPA12 [Fusarium oxysporum f. sp. lycopersici 4287]	sp|P32529|RPA12_YEAST;	DNA-directed RNA polymerase I subunit RPA12 OS=Saccharomyces cerevisiae;	PF01096.19;PF02150.17	GO:0006379;GO:0006351;GO:0005730;GO:0008270;GO:0003676;GO:000389	BP:mRNA cleavage;BP:transcription, DNA-templated;CC:nucleolus;MF:zinc ion binding;MF:nucleic acid binding;MF:DNA-directed RNA polymerase activity;	K03000	RPA12, ZNRD1	map03020	RNA polymerase
FVER_08470	CVK84782.1	related to nicotinate phosphoribosyltransferase [Fusarium mangiferae]	sp|Q9UTK3|NPT1_SCHPO;	Probable nicotinate phosphoribosyltransferase OS=Schizosaccharomyces pombe;	PF00172.19	GO:0016021;GO:0005634;GO:0016757;GO:0000981;GO:000827	CC:integral component of membrane;CC:nucleus;MF:transferase activity, transferring glycosyl groups;MF:RNA polymerase II transcription factor activity, sequence-specific DNA binding;MF:zinc ion binding;	K00763	pncB, NAPRT1	map00760	Nicotinate and nicotinamide metabolism
FVER_08515	XP_018240584.1	hypothetical protein FOXG_05373 [Fusarium oxysporum f. sp. lycopersici 4287]	sp|O13910|MPP10_SCHPO;	U3 small nucleolar ribonucleoprotein protein mpp10 OS=Schizosaccharomyces pombe;	PF04006.13	GO:0006364;GO:0005732;GO:003445	BP:rRNA processing;CC:small nucleolar ribonucleoprotein complex;CC:Mpp10 complex;	K14559	MPP10	map03008	Ribosome biogenesis in eukaryotes
FVER_08529	XP_018249950.1	DNA-directed RNA polymerase I, II, and III subunit RPABC4 [Fusarium oxysporum f. sp. lycopersici 4287]	sp|P40422|RPAB4_YEAST;	DNA-directed RNA polymerases I, II, and III subunit RPABC4 OS=Saccharomyces cerevisiae;	PF03604.14	GO:0006351;GO:0042797;GO:0005736;GO:0005666;GO:0005665;GO:0003677;GO:0001056;GO:0001054;GO:0001055;GO:0003968;GO:0003899;GO:000827	BP:transcription, DNA-templated;BP:tRNA transcription from RNA polymerase III promoter;CC:DNA-directed RNA polymerase I complex;CC:DNA-directed RNA polymerase III complex;CC:DNA-directed RNA polymerase II, core complex;MF:DNA binding;MF:RNA polymerase III activity;MF:RNA polymerase I activity;MF:RNA polymerase II activity;MF:RNA-directed RNA polymerase activity;MF:DNA-directed RNA polymerase acti…	K03009	RPB12, POLR2K	map03020	RNA polymerase
FVER_08564	CVK98380.1	related to UTP5 protein [Fusarium mangiferae]	sp|Q9HE11|UTP5_SCHPO;	U3 small nucleolar RNA-associated protein 5 OS=Schizosaccharomyces pombe;	PF04003.13	------	------	K14546	UTP5, WDR43	map03008	Ribosome biogenesis in eukaryotes
FVER_08585	XP_023426191.1	related to GTP-binding protein Bms1p, required for distinct steps of 40S ribosome biogenesis [Fusarium fujikuroi IMI 58289]	sp|O94653|BMS1_SCHPO;	Ribosome biogenesis protein bms1 OS=Schizosaccharomyces pombe;	PF04950.13;PF08142.13;PF13401.7;PF13191.7;PF00004.30;PF13671.7;PF01926.24	GO:0042254;GO:0000472;GO:0000480;GO:0005737;GO:0005730;GO:0005634;GO:0030686;GO:0003924;GO:0034511;GO:000552	BP:ribosome biogenesis;BP:endonucleolytic cleavage to generate mature 5'-end of SSU-rRNA fro;BP:endonucleolytic cleavage in 5'-ETS of tricistronic rRNA transcrip;CC:cytoplasm;CC:nucleolus;CC:nucleus;CC:90S preribosome;MF:GTPase activity;MF:U3 snoRNA binding;MF:GTP binding;	K14569	BMS1	map03008	Ribosome biogenesis in eukaryotes
FVER_08617	XP_031074949.1	related to TSC13-required for elongation of VLCFA moiety of sphingolipids [Fusarium proliferatum ET1]	sp|Q55C17|TECR_DICDI;	Very-long-chain enoyl-CoA reductase OS=Dictyostelium discoideum OX=44689 GN=gpsn2 PE=3 SV=1;	PF02544.17;PF06966.13	GO:0006629;GO:0016021;GO:001662	BP:lipid metabolic process;CC:integral component of membrane;MF:oxidoreductase activity, acting on the CH-CH group of donors;	K10258	TER, TSC13, CER10	map01040;map00062	Biosynthesis of unsaturated fatty acids;Fatty acid elongation
FVER_08636	RBR10629.1	hypothetical protein FVER53590_04473 [Fusarium verticillioides]	sp|Q4IAA0|FAL1_GIBZE;	ATP-dependent RNA helicase FAL1 OS=Gibberella zeae;	PF00270.30;PF00271.32;PF13604.7;PF13245.7	GO:0003743;GO:0003676;GO:0005524;GO:000438	MF:translation initiation factor activity;MF:nucleic acid binding;MF:ATP binding;MF:helicase activity;	K13025	EIF4A3, FAL1	map03013;map03015;map03040	RNA transport;mRNA surveillance pathway;Spliceosome
FVER_08647	RBA20378.1	hypothetical protein FPRO05_08823 [Fusarium proliferatum]	------	------	PF11705.9	------	------	K03024	RPC7, POLR3G	map03020	RNA polymerase
FVER_08651	EWZ90792.1	hypothetical protein FOWG_08365 [Fusarium oxysporum f. sp. lycopersici MN25]	sp|O74197|PUR6_CANGA;	Phosphoribosylaminoimidazole carboxylase OS=Candida glabrata;	PF00731.21;PF02222.23;PF17769.2;PF07478.14;PF02786.18	GO:0006189;GO:0004638;GO:0046872;GO:0043727;GO:000552	BP:'de novo' IMP biosynthetic process;MF:phosphoribosylaminoimidazole carboxylase activity;MF:metal ion binding;MF:5-amino-4-imidazole carboxylate lyase activity;MF:ATP binding;	K11808	ADE2	map00230	Purine metabolism
FVER_08769	XP_023433669.1	related to rRNA processing protein [Fusarium fujikuroi IMI 58289]	sp|Q12277|RRP42_YEAST;	Exosome complex component RRP42 OS=Saccharomyces cerevisiae;	PF01138.22	------	------	cmt;K12589	;RRP42, EXOSC7	map03018	RNA degradation
FVER_08811	XP_023428791.1	probable DIP2-Dom34p-interacting protein [Fusarium fujikuroi IMI 58289]	sp|P87177|YB1C_SCHPO;	Uncharacterized WD repeat-containing protein C3D6.12 OS=Schizosaccharomyces pombe;	PF00400.33;PF04003.13	GO:001602	CC:integral component of membrane;	K14556	DIP2, UTP12, WDR3	map03008	Ribosome biogenesis in eukaryotes
FVER_08911	XP_031086983.1	probable carnitine O-acetyltransferase precursor [Fusarium proliferatum ET1]	sp|Q00614|CACP_CANTR;	Carnitine O-acetyltransferase, mitochondrial OS=Candida tropicalis OX=5482 GN=CAT2 PE=3 SV=1;	PF00755.21	GO:001674	MF:transferase activity, transferring acyl groups;	K00624	E2.3.1.7	map04146	Peroxisome
FVER_08929	XP_018237934.1	IMP-specific 5'-nucleotidase 1 [Fusarium oxysporum f. sp. lycopersici 4287]	sp|Q4HTS9|ISN1_GIBZE;	IMP-specific 5'-nucleotidase 1 OS=Gibberella zeae;	PF06437.12	GO:0009117;GO:0006190;GO:0000287;GO:005048	BP:nucleotide metabolic process;BP:inosine salvage;MF:magnesium ion binding;MF:IMP 5'-nucleotidase activity;	K18550	ISN1	map00230;map00760	Purine metabolism;Nicotinate and nicotinamide metabolism
FVER_09047	XP_018751200.1	threonine synthase [Fusarium verticillioides 7600]	sp|Q42598|THRC_SCHPO;	Threonine synthase OS=Schizosaccharomyces pombe;	PF14821.7;PF00291.26	------	------	K01733	thrC	map00750;map00260	Vitamin B6 metabolism;Glycine, serine and threonine metabolism
FVER_09058	KAF4424267.1	serine hydroxymethyltransferase mitochondrial [Fusarium acutatum]	sp|Q7S5N8|GLYM_NEUCR;	Putative serine hydroxymethyltransferase, mitochondrial OS=Neurospora crassa;	PF00464.20	GO:0035999;GO:0019264;GO:0032259;GO:0004372;GO:0030170;GO:000816	BP:tetrahydrofolate interconversion;BP:glycine biosynthetic process from serine;BP:methylation;MF:glycine hydroxymethyltransferase activity;MF:pyridoxal phosphate binding;MF:methyltransferase activity;	K00600	glyA, SHMT	map00460;map00630;map00680;map00670;map00260	Cyanoamino acid metabolism;Glyoxylate and dicarboxylate metabolism;Methane metabolism;One carbon pool by folate;Glycine, serine and threonine metabolism
FVER_09155	XP_023428115.1	related to nuclear pore protein NSP1 [Fusarium fujikuroi IMI 58289]	sp|G0SBQ3|NSP1_CHATD;	Nucleoporin NSP1 OS=Chaetomium thermophilum;	PF05064.14;PF13634.7	GO:0005643;GO:001705	CC:nuclear pore;MF:structural constituent of nuclear pore;	K14306	NUP62, NSP1	map03013	RNA transport
FVER_09223	CVL10641.1	DAK2-Dihydroxyacetone kinase [Fusarium proliferatum]	sp|O74215|DAK2_SCHPO;	Dihydroxyacetone kinase 2 OS=Schizosaccharomyces pombe;	PF02733.18;PF02734.18	GO:0006071;GO:0004371;GO:000552	BP:glycerol metabolic process;MF:glycerone kinase activity;MF:ATP binding;	nhe;K00863	;DAK, TKFC	map00680;map00051;map00561	Methane metabolism;Fructose and mannose metabolism;Glycerolipid metabolism
FVER_09255	XP_031057381.1	valyl-tRNA synthetase [Fusarium oxysporum f. sp. cubense tropical race 4 54006]	sp|P28350|SYV_NEUCR;	Valine--tRNA ligase, mitochondrial OS=Neurospora crassa;	PF00133.23;PF08264.14;PF09334.12;PF13603.7;PF10458.10	GO:0006438;GO:0005737;GO:0004832;GO:0005524;GO:000216	BP:valyl-tRNA aminoacylation;CC:cytoplasm;MF:valine-tRNA ligase activity;MF:ATP binding;MF:aminoacyl-tRNA editing activity;	K01873	VARS, valS	map00970	Aminoacyl-tRNA biosynthesis
FVER_09262	XP_031081990.1	related to phosphatidylinositol-4-phosphate 5-kinase [Fusarium proliferatum ET1]	sp|O13853|ITS3_SCHPO;	Phosphatidylinositol 4-phosphate 5-kinase its3 OS=Schizosaccharomyces pombe;	PF01504.19	GO:0016307;GO:000552	MF:phosphatidylinositol phosphate kinase activity;MF:ATP binding;	K00889	PIP5K	map04139;map04144;map04011;map04070;map00562	Mitophagy - yeast;Endocytosis;MAPK signaling pathway - yeast;Phosphatidylinositol signaling system;Inositol phosphate metabolism
FVER_09366	RBA18038.1	hypothetical protein FPRO05_11056 [Fusarium proliferatum]	sp|Q09751|LGUL_SCHPO;	Lactoylglutathione lyase OS=Schizosaccharomyces pombe;	PF00903.26;PF13669.7	GO:0046872;GO:000446	MF:metal ion binding;MF:lactoylglutathione lyase activity;	K01759	GLO1, gloA	map00620	Pyruvate metabolism
FVER_09385	KAF4437379.1	cell cycle arrest BUB2 [Fusarium acutatum]	sp|P36618|CDC16_SCHPO;	Cell division control protein 16 OS=Schizosaccharomyces pombe;	PF00566.19	------	------	K02179	BUB2	map04111	Cell cycle - yeast
FVER_09401	PNP75920.1	hypothetical protein FNYG_10780 [Fusarium nygamai]	sp|Q01373|FOX2_NEUCR;	Peroxisomal hydratase-dehydrogenase-epimerase OS=Neurospora crassa;	PF00106.26;PF13561.7;PF01575.20;PF08659.11;PF02882.20	GO:001649	MF:oxidoreductase activity;	K14729	FOX2	map00640;map00410	Propanoate metabolism;beta-Alanine metabolism
FVER_09422	XP_018743044.1	DNA-directed RNA polymerase III subunit RPC2 [Fusarium verticillioides 7600]	sp|Q10233|RPC2_SCHPO;	DNA-directed RNA polymerase III subunit RPC2 OS=Schizosaccharomyces pombe;	PF00562.29;PF04563.16;PF04560.21;PF04561.15;PF04566.14;PF04565.17;PF04567.18	GO:0006351;GO:0003899;GO:0032549;GO:000367	BP:transcription, DNA-templated;MF:DNA-directed RNA polymerase activity;MF:ribonucleoside binding;MF:DNA binding;	nhe;K03021	;RPC2, POLR3B	map03020	RNA polymerase
FVER_09476	CVL05356.1	uncharacterized protein FMAN_10784 [Fusarium mangiferae]	sp|Q9HWG9|PHZS_PSEAE;	5-methylphenazine-1-carboxylate 1-monooxygenase OS=Pseudomonas aeruginosa;	PF01494.20	GO:0016021;GO:007194	CC:integral component of membrane;MF:FAD binding;	K08737	MSH6	map03430	Mismatch repair
FVER_09602	XP_018232780.1	methylenetetrahydrofolate dehydrogenase (NAD+) [Fusarium oxysporum f. sp. lycopersici 4287]	sp|Q9P786|MTD1_SCHPO;	Methylenetetrahydrofolate dehydrogenase [NA;	PF00763.24;PF02882.20	GO:000448	MF:methylenetetrahydrofolate dehydrogenas;	K00295	MTD1	map00670	One carbon pool by folate
FVER_09625	XP_023429206.1	probable puff-specific nuclear protein Bx42 [Fusarium fujikuroi IMI 58289]	sp|Q4WEH7|PRP45_ASPFU;	Pre-mRNA-processing protein 45 OS=Neosartorya fumigata;	PF02731.16	GO:0000398;GO:000568	BP:mRNA splicing, via spliceosome;CC:spliceosomal complex;	K06063	SNW1, SKIIP, SKIP	map03040	Spliceosome
FVER_09658	XP_023428275.1	related to UTP10-U3 snoRNP protein [Fusarium fujikuroi IMI 58289]	sp|Q7RZM8|UTP10_NEUCR;	U3 small nucleolar RNA-associated protein 10 OS=Neurospora crassa;	PF08146.13;PF12397.9;PF02985.23	------	------	K14550	UTP10, HEATR1	map03008	Ribosome biogenesis in eukaryotes
FVER_09666	EWZ44044.1	ATP-dependent DNA helicase 2 subunit 2 [Fusarium oxysporum Fo47]	sp|Q2H6C5|KU80_CHAGB;	ATP-dependent DNA helicase II subunit 2 OS=Chaetomium globosum;	PF08785.12;PF02735.17;PF03731.16	GO:0006310;GO:0000723;GO:0006303;GO:0043564;GO:0042162;GO:0003678;GO:0003684;GO:000552	BP:DNA recombination;BP:telomere maintenance;BP:double-strand break repair via nonhomologous end joining;CC:Ku7;MF:telomeric DNA binding;MF:DNA helicase activity;MF:damaged DNA binding;MF:ATP binding;	K10885	XRCC5, KU80, G22P2	map03450	Non-homologous end-joining
FVER_09715	XP_023425506.1	probable 2-dehydro-3-deoxyphosphoheptonate aldolase [Fusarium fujikuroi IMI 58289]	sp|C9K7C8|AMT16_ALTAL;	Phospho-2-dehydro-3-deoxyheptonate aldolase AMT16 OS=Alternaria alternata OX=5599 GN=AMT16 PE=2 SV=1;	PF00793.21	GO:0009073;GO:000384	BP:aromatic amino acid family biosynthetic process;MF:3-deoxy-7-phosphoheptulonate synthase activity;	K01626	E2.5.1.54, aroF, aroG, aroH	map00400	Phenylalanine, tyrosine and tryptophan biosynthesis
FVER_09759	CVL04601.1	related to acetoacetyl-CoA synthetase [Fusarium mangiferae]	sp|Q09925|LCB2_SCHPO;	Serine palmitoyltransferase 2 OS=Schizosaccharomyces pombe;	PF00501.29;PF16177.6;PF13193.7	GO:0006629;GO:003072	BP:lipid metabolic process;MF:acetoacetate-CoA ligase activity;	K00654;K01907	SPT;AACS, acsA	map00600;map00280;map04138;map00650	Sphingolipid metabolism;Valine, leucine and isoleucine degradation;Autophagy - yeast;Butanoate metabolism
FVER_09764	XP_031044244.1	uncharacterized protein FOYG_04398 [Fusarium oxysporum NRRL 32931]	sp|O59836|HIM1_SCHPO;	Hsk1-interacting molecule 1 OS=Schizosaccharomyces pombe;	PF08630.11;PF07535.13	GO:0016301;GO:0008270;GO:000367	MF:kinase activity;MF:zinc ion binding;MF:nucleic acid binding;	K02309	DBF4	map04111;map04113	Cell cycle - yeast;Meiosis - yeast
FVER_09783	XP_023426259.1	related to CECR1 protein [Fusarium fujikuroi IMI 58289]	sp|P58781|ADA2_DANRE;	Adenosine deaminase 2-A OS=Danio rerio OX=7955 GN=ada2a PE=2 SV=2;	PF00962.23;PF08451.12	GO:0005615;GO:001923	CC:extracellular space;MF:deaminase activity;	K19572	CECR1, ADA2	map00230	Purine metabolism
FVER_09827	CVK97513.1	probable YCS4-subunit of condensin protein complex [Fusarium mangiferae]	sp|O94679|CND1_SCHPO;	Condensin complex subunit 1 OS=Schizosaccharomyces pombe;	PF12922.8;PF12717.8;PF02985.23;PF13646.7;PF01602.21;PF12719.8	GO:0007076;GO:0051301;GO:0005737;GO:0005730;GO:0005634;GO:0000778;GO:0035327;GO:0000799;GO:0016887;GO:0003690;GO:000369	BP:mitotic chromosome condensation;BP:cell division;CC:cytoplasm;CC:nucleolus;CC:nucleus;CC:condensed nuclear chromosome kinetochore;CC:transcriptionally active chromatin;CC:nuclear condensin complex;MF:ATPase activity;MF:double-stranded DNA binding;MF:single-stranded DNA binding;	K06677	YCS4, CNAP1, CAPD2	map04111	Cell cycle - yeast
FVER_09830	EXM27076.1	acetolactate synthase I/II/III large subunit [Fusarium oxysporum f. sp. vasinfectum 25433]	sp|P07342|ILVB_YEAST;	Acetolactate synthase catalytic subunit, mitochondrial OS=Saccharomyces cerevisiae;	PF02775.22	GO:0009099;GO:0009097;GO:0050660;GO:0000287;GO:0030976;GO:000398	BP:valine biosynthetic process;BP:isoleucine biosynthetic process;MF:flavin adenine dinucleotide binding;MF:magnesium ion binding;MF:thiamine pyrophosphate binding;MF:acetolactate synthase activity;	K01652	E2.2.1.6L, ilvB, ilvG, ilvI	map00660;map00290;map00770;map00650	C5-Branched dibasic acid metabolism;Valine, leucine and isoleucine biosynthesis;Pantothenate and CoA biosynthesis;Butanoate metabolism
FVER_09850	XP_031041490.1	translation initiation factor 4E [Fusarium oxysporum NRRL 32931]	sp|P78954|IF4E1_SCHPO;	Eukaryotic translation initiation factor 4E-1 OS=Schizosaccharomyces pombe;	PF01652.19	GO:0000184;GO:0051726;GO:1901195;GO:0005737;GO:0010494;GO:0016281;GO:0005634;GO:0098808;GO:0032266;GO:000374	BP:nuclear-transcribed mRNA catabolic process, nonsense-mediated decay;BP:regulation of cell cycle;BP:positive regulation of formation of translation preinitiation complex;CC:cytoplasm;CC:cytoplasmic stress granule;CC:eukaryotic translation initiation factor 4F complex;CC:nucleus;MF:mRNA cap binding;MF:phosphatidylinositol-3-phosphate binding;MF:translation initiation factor activity;	K03259	EIF4E	map03013	RNA transport
FVER_09883	PNP76230.1	hypothetical protein FNYG_10289 [Fusarium nygamai]	sp|O14053|UTP21_SCHPO;	U3 small nucleolar RNA-associated protein 21 homolog OS=Schizosaccharomyces pombe;	PF04192.13;PF00400.33;PF12894.8	GO:0006364;GO:003204	BP:rRNA processing;CC:small-subunit processome;	K14554	UTP21, WDR36	map03008	Ribosome biogenesis in eukaryotes
FVER_09950	RKL32194.1	hypothetical protein BFJ72_g10774 [Fusarium proliferatum]	sp|P08158|AMDS_EMENI;	Acetamidase OS=Emericella nidulans;	PF01425.22	------	------	K01426	E3.5.1.4, amiE	map00360;map00330;map00380	Phenylalanine metabolism;Arginine and proline metabolism;Tryptophan metabolism
FVER_10055	QGI59075.1	hypothetical protein CEK27_001200 [Fusarium fujikuroi]	sp|Q8X082|RFC5_NEUCR;	Replication factor C subunit 5 OS=Neurospora crassa;	PF13177.7;PF00004.30;PF13401.7;PF08542.12;PF13479.7;PF13191.7	GO:0006260;GO:000367	BP:DNA replication;MF:DNA binding;	K10756	RFC3_5	map03430;map03420;map03030	Mismatch repair;Nucleotide excision repair;DNA replication
FVER_10083	XP_031080381.1	related to PEX3-peroxisomal assembly protein-peroxin [Fusarium proliferatum ET1]	sp|Q874C0|PEX3_YARLI;	Peroxisomal biogenesis factor 3 OS=Yarrowia lipolytica;	PF04882.13	GO:0007031;GO:000577	BP:peroxisome organization;CC:integral component of peroxisomal membrane;	K13336	PEX3	map04146	Peroxisome
FVER_10117	KAF4444826.1	zinc finger Gcs1p [Fusarium acutatum]	sp|Q9UT34|YIQ9_SCHPO;	Uncharacterized protein C824.09c OS=Schizosaccharomyces pombe;	PF01412.19	GO:0046872;GO:000509	MF:metal ion binding;MF:GTPase activator activity;	K12486	SMAP	map04144	Endocytosis
FVER_10139	KLO86806.1	nucleoporin-interacting protein NIC96 [Fusarium fujikuroi]	sp|G0S024|NIC96_CHATD;	Nucleoporin NIC96 OS=Chaetomium thermophilum;	PF04097.15;PF13634.7	GO:0005643;GO:001705	CC:nuclear pore;MF:structural constituent of nuclear pore;	K14309	NUP93, NIC96	map03013	RNA transport
FVER_10155	CVL10693.1	related to DNA primase 48K protein PRI1 [Fusarium proliferatum]	sp|Q4I8X0|TRM10_GIBZE;	tRNA;	PF01896.20	GO:000389	MF:DNA primase activity;	K02684	PRI1	map03030	DNA replication
FVER_10184	CVK96656.1	uncharacterized protein FMAN_10986 [Fusarium mangiferae]	sp|P40995|SCD1_SCHPO;	Rho guanine nucleotide exchange factor scd1 OS=Schizosaccharomyces pombe;	PF15411.7;PF06395.12;PF17111.6	------	------	K11236	CDC24	map04011	MAPK signaling pathway - yeast
FVER_10210	RKL48645.1	Chitin synthase 3 [Fusarium proliferatum]	sp|P30588|CHS3_NEUCR;	Chitin synthase 3 OS=Neurospora crassa;	PF01644.18;PF08407.12;PF03142.16;PF13632.7	GO:0006031;GO:0071555;GO:0016021;GO:0005886;GO:000410	BP:chitin biosynthetic process;BP:cell wall organization;CC:integral component of membrane;CC:plasma membrane;MF:chitin synthase activity;	K00698	CHS1	map00520	Amino sugar and nucleotide sugar metabolism
FVER_10215	XP_018234955.1	hypothetical protein FOXG_01885 [Fusarium oxysporum f. sp. lycopersici 4287]	sp|O74772|CWF14_SCHPO;	Pre-mRNA-splicing factor cwf14 OS=Schizosaccharomyces pombe;	PF01125.18	GO:000563	CC:nucleus;	K12873	BUD31, G10	map03040	Spliceosome
FVER_10236	XP_018237120.1	2-oxoisovalerate dehydrogenase E1 component, beta subunit [Fusarium oxysporum f. sp. lycopersici 4287]	sp|P9WF02|ODBB_CHATD;	2-oxoisovalerate dehydrogenase subunit beta, mitochondrial OS=Chaetomium thermophilum;	PF02779.25;PF02780.21;PF17147.5	GO:0051016;GO:0008290;GO:0003779;GO:000382	BP:barbed-end actin filament capping;CC:F-actin capping protein complex;MF:actin binding;MF:catalytic activity;	K00167	BCKDHB, bkdA2	map00280;map00640	Valine, leucine and isoleucine degradation;Propanoate metabolism
FVER_10263	RBR08733.1	hypothetical protein FVER53590_00902 [Fusarium verticillioides]	sp|Q9LIS2|RBG4_ARATH;	Glycine-rich RNA-binding protein 4, mitochondrial OS=Arabidopsis thaliana OX=3702 GN=RBG4 PE=2 SV=1;	PF00076.23;PF16367.6	GO:000372	MF:RNA binding;	K07232	CHAC, chaC	map00480	Glutathione metabolism
FVER_10268	XP_023424332.1	probable CDC21-thymidylate synthase [Fusarium fujikuroi IMI 58289]	sp|P06785|TYSY_YEAST;	Thymidylate synthase OS=Saccharomyces cerevisiae;	PF00303.20	GO:0006231;GO:000479	BP:dTMP biosynthetic process;MF:thymidylate synthase activity;	K00560	thyA, TYMS	map00240;map00670	Pyrimidine metabolism;One carbon pool by folate
FVER_10296	RKL40597.1	putative exonuclease [Fusarium proliferatum]	sp|O94443|YFE9_SCHPO;	Uncharacterized exonuclease C637.09 OS=Schizosaccharomyces pombe;	PF00929.25	GO:0004527;GO:000367	MF:exonuclease activity;MF:nucleic acid binding;	K14570	REX1, REXO1, RNH70	map03008	Ribosome biogenesis in eukaryotes
FVER_10330	XP_023433584.1	probable DNA repair endonuclease rad2 [Fusarium fujikuroi IMI 58289]	sp|C7Z125|FEN1_NECH7;	Flap endonuclease 1 OS=Nectria haematococca;	PF00867.19;PF00752.18;PF01367.21	GO:0006286;GO:0035753;GO:0006284;GO:0006303;GO:0000734;GO:0001302;GO:0006260;GO:0043137;GO:0005730;GO:0005829;GO:0005739;GO:0005654;GO:0000287;GO:0017108;GO:0008409;GO:000367	BP:base-excision repair, base-free sugar-phosphate removal;BP:maintenance of DNA trinucleotide repeats;BP:base-excision repair;BP:double-strand break repair via nonhomologous end joining;BP:gene conversion at mating-type locus, DNA repair synthesis;BP:replicative cell aging;BP:DNA replication;BP:DNA replication, removal of RNA primer;CC:nucleolus;CC:cytosol;CC:mitochondrion;CC:nucleoplasm;MF:magn…	K04799	FEN1, RAD2	map03450;map03410;map03030	Non-homologous end-joining;Base excision repair;DNA replication
FVER_10339	CVK87202.1	related to nucleolar 100K polymyositis-scleroderma protein [Fusarium mangiferae]	sp|Q10146|RRP6_SCHPO;	Exosome complex exonuclease rrp6 OS=Schizosaccharomyces pombe;	PF01612.21;PF08066.13;PF00570.24	GO:0006396;GO:0000176;GO:0008408;GO:0003676;GO:000016	BP:RNA processing;CC:nuclear exosom;MF:3'-5' exonuclease activity;MF:nucleic acid binding;MF:nucleotide binding;	K12591	RRP6, EXOSC10	map03018	RNA degradation
FVER_10347	CVK89610.1	uncharacterized protein FMAN_04208 [Fusarium mangiferae]	sp|Q10190|LSG1_SCHPO;	Large subunit GTPase 1 OS=Schizosaccharomyces pombe;	PF01926.24;PF02421.19;PF03193.17	GO:000801	MF:microtubule binding;	K14539	LSG1	map03008	Ribosome biogenesis in eukaryotes
FVER_10350	KLO80054.1	putative nuclear protein [Fusarium fujikuroi]	sp|Q10178|SF3B1_SCHPO;	U2 snRNP component prp10 OS=Schizosaccharomyces pombe;	PF08920.11;PF13513.7;PF01602.21	GO:0000245;GO:0005686;GO:0071004;GO:000372	BP:spliceosomal complex assembly;CC:U2 snRNP;CC:U2-type prespliceosome;MF:mRNA binding;	K12828	SF3B1, SAP155	map03040	Spliceosome
FVER_10456	CVK88805.1	uncharacterized protein FMAN_04694 [Fusarium mangiferae]	sp|Q6C6Q7|IPK1_YARLI;	Inositol-pentakisphosphate 2-kinase OS=Yarrowia lipolytica;	PF06090.13	GO:0035299;GO:000552	MF:inositol pentakisphosphate 2-kinase activity;MF:ATP binding;	K19786	IPK1	map04070;map00562	Phosphatidylinositol signaling system;Inositol phosphate metabolism
FVER_10502	XP_018754660.1	glutamate 5-kinase [Fusarium verticillioides 7600]	sp|O13810|PROB_SCHPO;	Probable glutamate 5-kinase OS=Schizosaccharomyces pombe;	PF00696.29;PF01472.21	GO:0006561;GO:0005737;GO:0004349;GO:000372	BP:proline biosynthetic process;CC:cytoplasm;MF:glutamate 5-kinase activity;MF:RNA binding;	K00931	proB	map00330;map00332	Arginine and proline metabolism;Carbapenem biosynthesis
FVER_10531	RKL35366.1	Protein arginine N-methyltransferase skb1 [Fusarium proliferatum]	sp|P78963|SKB1_SCHPO;	Protein arginine N-methyltransferase skb1 OS=Schizosaccharomyces pombe;	PF17285.3;PF05185.17;PF17286.3	GO:0016274;GO:001630	MF:protein-arginine N-methyltransferase activity;MF:kinase activity;	K02516	PRMT5, HSL7	map04111;map03013;map04011	Cell cycle - yeast;RNA transport;MAPK signaling pathway - yeast
FVER_10546	CVK93706.1	related to protein LAC1 [Fusarium mangiferae]	sp|Q8J2Q2|FUM18_GIBM7;	Sphingosine N-acyltransferase-like protein FUM18 OS=Gibberella moniliformis;	PF03798.17;PF08390.12	GO:001602	CC:integral component of membrane;	K04709	LAG1	map00600	Sphingolipid metabolism
FVER_10588	KAF4417427.1	glutamine amidotransferase [Fusarium acutatum]	sp|Q8LAD0|PDX2_ARATH;	Probable pyridoxal 5'-phosphate synthase subunit PDX2 OS=Arabidopsis thaliana OX=3702 GN=PDX2 PE=1 SV=1;	PF01174.20;PF07685.15;PF01965.25	GO:0042823;GO:0006541;GO:0016740;GO:000435	BP:pyridoxal phosphate biosynthetic process;BP:glutamine metabolic process;MF:transferase activity;MF:glutaminase activity;	K08681	pdxT, pdx2	map00750	Vitamin B6 metabolism
FVER_10619	XP_018250622.1	hypothetical protein FOXG_12147 [Fusarium oxysporum f. sp. lycopersici 4287]	sp|P0CL20|HOGA1_COCIM;	Putative 4-hydroxy-2-oxoglutarate aldolase, mitochondrial OS=Coccidioides immitis;	PF00701.23	GO:001682	MF:lyase activity;	K18123	HOGA1	map00630;map00330	Glyoxylate and dicarboxylate metabolism;Arginine and proline metabolism
FVER_10707	XP_018750453.1	50S ribosomal protein L24e [Fusarium verticillioides 7600]	sp|Q6CF69|RLP24_YARLI;	Ribosome biogenesis protein RLP24 OS=Yarrowia lipolytica;	PF01246.21	GO:0042273;GO:1902626;GO:0005840;GO:0005730;GO:0030687;GO:0051117;GO:000167	BP:ribosomal large subunit biogenesis;BP:assembly of large subunit precursor of preribosome;CC:ribosome;CC:nucleolus;CC:preribosome, large subunit precursor;MF:ATPase binding;MF:ATPase activator activity;	K02896	RP-L24e, RPL24	map03010	Ribosome
FVER_10770	XP_031046926.1	3-oxoacyl-[acyl-carrier-protein] synthase II [Fusarium oxysporum NRRL 32931]	sp|Q8L3X9|KASM_ARATH;	3-oxoacyl-[acyl-carrier-protein] synthase, mitochondrial OS=Arabidopsis thaliana OX=3702 GN=KAS PE=1 SV=1;	PF00109.27;PF02801.23;PF00108.24	GO:0006633;GO:001674	BP:fatty acid biosynthetic process;MF:transferase activity, transferring acyl groups other than amino-acyl groups;	K09458	fabF, OXSM, CEM1	map00780;map00061	Biotin metabolism;Fatty acid biosynthesis
FVER_10790	CVK93743.1	related to dynein light intermediate chain 2 [Fusarium mangiferae]	sp|O43237|DC1L2_HUMAN;	Cytoplasmic dynein 1 light intermediate chain 2 OS=Homo sapiens OX=9606 GN=DYNC1LI2 PE=1 SV=1;	PF05783.12	GO:0007018;GO:0005868;GO:000377	BP:microtubule-based movement;CC:cytoplasmic dynein complex;MF:microtubule motor activity;	K10416	DYNC1LI, DNCLI	map04145	Phagosome
FVER_10817	XP_023427756.1	probable replication factor c (40 kDa subunit) [Fusarium fujikuroi IMI 58289]	sp|O94449|RFC4_SCHPO;	Replication factor C subunit 4 OS=Schizosaccharomyces pombe;	PF08542.12;PF00004.30;PF13177.7;PF13173.7;PF13191.7;PF05496.13;PF01443.19;PF07726.12;PF06144.14	GO:0006272;GO:0006260;GO:0007062;GO:0005829;GO:0005663;GO:0031390;GO:0031389;GO:0031391;GO:0005634;GO:0003689;GO:0003677;GO:000552	BP:leading strand elongation;BP:DNA replication;BP:sister chromatid cohesion;CC:cytosol;CC:DNA replication factor C complex;CC:Ctf18 RFC-like complex;CC:Rad17 RFC-like complex;CC:Elg1 RFC-like complex;CC:nucleus;MF:DNA clamp loader activity;MF:DNA binding;MF:ATP binding;	K10755	RFC2_4	map03430;map03420;map03030	Mismatch repair;Nucleotide excision repair;DNA replication
FVER_10885	XP_031066991.1	DNA-directed RNA polymerase I subunit RPA2 [Fusarium oxysporum f. sp. cubense tropical race 4 54006]	sp|O74633|RPA2_NEUCR;	DNA-directed RNA polymerase I subunit RPA2 OS=Neurospora crassa;	PF00562.29;PF04563.16;PF04565.17;PF04561.15;PF06883.13;PF04560.21	GO:0006351;GO:0005634;GO:0003899;GO:0032549;GO:000367	BP:transcription, DNA-templated;CC:nucleus;MF:DNA-directed RNA polymerase activity;MF:ribonucleoside binding;MF:DNA binding;	nhe;K03002	;RPA2, POLR1B	map03020	RNA polymerase
FVER_10922	XP_018241812.1	hypothetical protein FOXG_06148 [Fusarium oxysporum f. sp. lycopersici 4287]	sp|O13864|IMB1_SCHPO;	Importin subunit beta-1 OS=Schizosaccharomyces pombe;	PF02985.23;PF13513.7;PF03810.20;PF13646.7;PF07539.13	GO:0006656;GO:0006612;GO:0006606;GO:0006607;GO:0051292;GO:0060188;GO:0046822;GO:0005737;GO:0005634;GO:0042564;GO:0008536;GO:0061676;GO:0061608;GO:0044877;GO:0005087;GO:009771	BP:phosphatidylcholine biosynthetic process;BP:protein targeting to membrane;BP:protein import into nucleus;BP:NLS-bearing protein import into nucleus;BP:nuclear pore complex assembly;BP:regulation of protein desumoylation;BP:regulation of nucleocytoplasmic transport;CC:cytoplasm;CC:nucleus;CC:NLS-dependent protein nuclear import complex;MF:Ran GTPase binding;MF:importin-alpha family protein bind…	K14293	KPNB1, IPO1	map03013	RNA transport
FVER_10931	KAF4485626.1	homoaconitase, mitochondrial [Fusarium agapanthi]	sp|Q4HVQ9|LYS4_GIBZE;	Homoaconitase, mitochondrial OS=Gibberella zeae;	PF00330.21;PF00694.20	GO:0019878;GO:0005739;GO:0046872;GO:0051539;GO:000440	BP:lysine biosynthetic process via aminoadipic acid;CC:mitochondrion;MF:metal ion binding;MF:4 iron, 4 sulfur cluster binding;MF:homoaconitate hydratase activity;	K01705	LYS4	map00300	Lysine biosynthesis
FVER_10963	QGI85525.1	hypothetical protein CEK25_012254 [Fusarium fujikuroi]	sp|P75713|ALLE_ECOLI;	;	PF07883.12;PF05899.13;PF02311.20;PF11699.9	------	------	K14977	ylbA, UGHY	map00230	Purine metabolism
FVER_11118	KAF4437442.1	aminodeoxychorismate synthase [Fusarium acutatum]	sp|P37254|ADCS_YEAST;	Aminodeoxychorismate synthase OS=Saccharomyces cerevisiae;	PF00425.19;PF00117.29;PF04715.14;PF07722.14	GO:0009058;GO:000654	BP:biosynthetic process;BP:glutamine metabolic process;	K20306;K13950	TRAPPC9, TRS120;pabAB	map00790	Folate biosynthesis
FVER_11203	RKK96570.1	Isocitrate lyase [Fusarium oxysporum]	sp|Q4HYR2|ACEA_GIBZE;	Isocitrate lyase OS=Gibberella zeae;	PF00463.22;PF13714.7	GO:0019752;GO:0004451;GO:004687	BP:carboxylic acid metabolic process;MF:isocitrate lyase activity;MF:metal ion binding;	K01637	E4.1.3.1, aceA	map00630	Glyoxylate and dicarboxylate metabolism
FVER_11213	XP_031086445.1	related to transcription activator protein acu-15 [Fusarium proliferatum ET1]	sp|P49413|UAY_EMENI;	Positive regulator of purine utilization OS=Emericella nidulans;	PF04082.19;PF00172.19	GO:0006351;GO:0005634;GO:0016021;GO:0003677;GO:0000981;GO:000827	BP:transcription, DNA-templated;CC:nucleus;CC:integral component of membrane;MF:DNA binding;MF:RNA polymerase II transcription factor activity, sequence-specific DNA binding;MF:zinc ion binding;	K00306	PIPOX	map04146;map00310;map00260	Peroxisome;Lysine degradation;Glycine, serine and threonine metabolism
FVER_11226	XP_031074825.1	uncharacterized protein FPRO_01648 [Fusarium proliferatum ET1]	sp|P53914|NAT10_YEAST;	RNA cytidine acetyltransferase OS=Saccharomyces cerevisiae;	PF13718.7;PF13725.7;PF05127.15;PF08351.12;PF13604.7	GO:0051391;GO:0000154;GO:0042274;GO:0005730;GO:0008080;GO:000552	BP:tRNA acetylation;BP:rRNA modification;BP:ribosomal small subunit biogenesis;CC:nucleolus;MF:N-acetyltransferase activity;MF:ATP binding;	K14521	NAT10, KRE33	map03008	Ribosome biogenesis in eukaryotes
FVER_11277	RKL47483.1	Serine/threonine-protein kinase MST20 [Fusarium proliferatum]	sp|Q7Z8E9|STE20_MAGO7;	Serine/threonine-protein kinase MST20 OS=Magnaporthe oryzae;	PF00069.26;PF07714.18;PF00786.29;PF17667.2;PF14531.7	GO:0004674;GO:000552	MF:protein serine/threonine kinase activity;MF:ATP binding;	K04409	PAK1	map04011;map04392	MAPK signaling pathway - yeast;Hippo signaling pathway - multiple species
FVER_11294	KAF4423034.1	splicing factor u2af 50 kda subunit [Fusarium acutatum]	sp|P33192|RS13_CANMA;	40S ribosomal protein S13 OS=Candida maltosa OX=5479 GN=RPS13 PE=3 SV=2;	PF08069.13;PF00312.23	GO:0000462;GO:0006397;GO:0006412;GO:0005840;GO:0005634;GO:0022627;GO:0070181;GO:0003735;GO:000372	BP:maturation of SSU-rRNA from tricistronic rRNA transcrip;BP:mRNA processing;BP:translation;CC:ribosome;CC:nucleus;CC:cytosolic small ribosomal subunit;MF:small ribosomal subunit rRNA binding;MF:structural constituent of ribosome;MF:RNA binding;	K02953	RP-S13e, RPS13	map03010	Ribosome
FVER_11401	RBA20407.1	succinate-semialdehyde dehydrogenase [Fusarium proliferatum]	sp|Q9US47|SSDH1_SCHPO;	Putative succinate-semialdehyde dehydrogenase C1002.12c [NAD;	PF00171.23	GO:001662	MF:oxidoreductase activity, acting on the aldehyde or oxo group of donors, NAD or NADP as acceptor;	K00135	gabD	map00250;map00310;map00760;map00350;map00650	Alanine, aspartate and glutamate metabolism;Lysine degradation;Nicotinate and nicotinamide metabolism;Tyrosine metabolism;Butanoate metabolism
FVER_11417	XP_018244083.1	H/ACA ribonucleoprotein complex subunit 1 [Fusarium oxysporum f. sp. lycopersici 4287]	sp|A1CVY3|GAR1_NEOFI;	H/ACA ribonucleoprotein complex subunit gar1 OS=Neosartorya fischeri;	PF04410.15	GO:0001522;GO:0006364;GO:0005730;GO:000372	BP:pseudouridine synthesis;BP:rRNA processing;CC:nucleolus;MF:RNA binding;	K11128	GAR1, NOLA1	map03008	Ribosome biogenesis in eukaryotes
FVER_11420	RFN44084.1	cytochrome c oxidase assembly protein subunit 11 [Fusarium fasciculatum]	sp|P51414|RL261_ARATH;	60S ribosomal protein L26-1 OS=Arabidopsis thaliana OX=3702 GN=RPL26A PE=2 SV=2;	PF16906.6;PF00467.30	GO:0006412;GO:0016021;GO:0015934;GO:0003735;GO:000550	BP:translation;CC:integral component of membrane;CC:large ribosomal subunit;MF:structural constituent of ribosome;MF:copper ion binding;	K02898	RP-L26e, RPL26	map03010	Ribosome
FVER_11430	KAF4421712.1	mRNA (guanine-N7-)-methyltransferase [Fusarium acutatum]	sp|A4R8D7|MCES_MAGO7;	mRNA cap guanine-N7 methyltransferase OS=Magnaporthe oryzae;	PF03291.17;PF13649.7;PF08242.13;PF13847.7;PF13489.7;PF08241.13	GO:0005634;GO:0042025;GO:0004482;GO:000372	CC:nucleus;CC:host cell nucleus;MF:mRN;MF:RNA binding;	K00565	RNMT	map03015	mRNA surveillance pathway
FVER_11483	XP_018755844.1	hypothetical protein FVEG_09125 [Fusarium verticillioides 7600]	sp|O14369|SCE3_SCHPO;	Probable RNA-binding protein sce3 OS=Schizosaccharomyces pombe;	PF00076.23	GO:0003723;GO:000374	MF:RNA binding;MF:translation initiation factor activity;	K03258	EIF4B	map03013	RNA transport
FVER_11539	XP_031039306.1	U3 small nucleolar ribonucleoprotein IMP3 [Fusarium oxysporum NRRL 32931]	sp|P32899|IMP3_YEAST;	U3 small nucleolar ribonucleoprotein protein IMP3 OS=Saccharomyces cerevisiae;	PF01479.26;PF00163.20	GO:001984	MF:rRNA binding;	K14560	IMP3	map03008	Ribosome biogenesis in eukaryotes
FVER_11598	CVK88849.1	related to GTPase-activating protein beta-chimerin [Fusarium proliferatum]	sp|P30337|CHIN_RAT;	N-chimaerin OS=Rattus norvegicus OX=10116 GN=Chn1 PE=1 SV=2;	PF00620.28;PF00412.23	GO:0007165;GO:004687	BP:signal transduction;MF:metal ion binding;	K19839	RGA1_2	map04011	MAPK signaling pathway - yeast
FVER_11607	XP_018759385.1	homocitrate synthase, mitochondrial [Fusarium verticillioides 7600]	sp|O94225|HOSM_PENRW;	Homocitrate synthase, mitochondrial OS=Penicillium rubens;	PF00682.20	GO:0019878;GO:0019752;GO:0046912;GO:000441	BP:lysine biosynthetic process via aminoadipic acid;BP:carboxylic acid metabolic process;MF:transferase activity, transferring acyl groups, acyl groups converted into alkyl on transfer;MF:homocitrate synthase activity;	K01655	LYS21, LYS20	map00300;map00620	Lysine biosynthesis;Pyruvate metabolism
FVER_11635	CVK89197.1	probable protein kinase CHM1 [Fusarium mangiferae]	sp|Q9HFW2|CLA4_ASHGO;	Serine/threonine-protein kinase CLA4 OS=Ashbya gossypii;	PF00069.26;PF07714.18;PF00786.29;PF15413.7;PF17667.2;PF14531.7	GO:0004674;GO:000552	MF:protein serine/threonine kinase activity;MF:ATP binding;	K19833	CLA4	map04011	MAPK signaling pathway - yeast
FVER_11662	XP_018240240.1	E3 ubiquitin-protein ligase hulA [Fusarium oxysporum f. sp. lycopersici 4287]	sp|G0S9J5|RSP5_CHATD;	E3 ubiquitin-protein ligase RSP5 OS=Chaetomium thermophilum;	PF00632.26;PF00397.27;PF00168.31	GO:0032511;GO:0032436;GO:2000203;GO:0034644;GO:0019220;GO:0048260;GO:0006808;GO:0000209;GO:0007005;GO:0016973;GO:0043162;GO:0006511;GO:0032443;GO:2000238;GO:2000235;GO:0034517;GO:2000232;GO:0045723;GO:0070086;GO:0010796;GO:0010795;GO:0010794;GO:0010793;GO:0072671;GO:0032956;GO:0042493;GO:0006333;GO:0006513;GO:0051865;GO:0045944;GO:0031384;GO:0000151;GO:0010008;GO:0005794;GO:0005934;GO:0031234;GO:…	BP:late endosome to vacuole transport via multivesicular body sorting pathway;BP:positive regulation of proteasomal ubiquitin-dependent protein catabolic process;BP:regulation of ribosomal large subunit export from nucleus;BP:cellular response to UV;BP:regulation of phosphate metabolic process;BP:positive regulation of receptor-mediated endocytosis;BP:regulation of nitrogen utilization;BP:protein…	K10591	NEDD4, RSP5	map04120;map04144;map04011	Ubiquitin mediated proteolysis;Endocytosis;MAPK signaling pathway - yeast
FVER_11680	PNP80789.1	hypothetical protein FNYG_05917 [Fusarium nygamai]	sp|Q9D1C9|RRP7A_MOUSE;	Ribosomal RNA-processing protein 7 homolog A OS=Mus musculus OX=10090 GN=Rrp7a PE=2 SV=1;	PF12923.8;PF17799.2	------	------	K14545	RRP7	map03008	Ribosome biogenesis in eukaryotes
FVER_11696	AMD38811.1	ammonia ligase [Fusarium sacchari]	sp|O74638|PYRG_GIBZE;	CTP synthase OS=Gibberella zeae;	PF06418.15;PF00117.29;PF07722.14	GO:0006541;GO:0044210;GO:0003883;GO:000552	BP:glutamine metabolic process;BP:'de novo' CTP biosynthetic process;MF:CTP synthase activity;MF:ATP binding;	K01937	pyrG, CTPS	map00240	Pyrimidine metabolism
FVER_11815	PNP81836.1	hypothetical protein FNYG_04862 [Fusarium nygamai]	sp|P00908|TRPG_NEUCR;	Multifunctional tryptophan biosynthesis protein OS=Neurospora crassa;	PF00218.22;PF00697.23;PF00117.29;PF07722.14	GO:0000162;GO:0006541;GO:0006568;GO:0004425;GO:0004640;GO:0033984;GO:000404	BP:tryptophan biosynthetic process;BP:glutamine metabolic process;BP:tryptophan metabolic process;MF:indole-3-glycerol-phosphate synthase activity;MF:phosphoribosylanthranilate isomerase activity;MF:indole-3-glycerol-phosphate lyase activity;MF:anthranilate synthase activity;	K13501	TRP1	map00400	Phenylalanine, tyrosine and tryptophan biosynthesis
FVER_11820	KLO91706.1	art-4 protein [Fusarium fujikuroi]	sp|Q9UTK0|NOB1_SCHPO;	20S-pre-rRNA D-site endonuclease nob1 OS=Schizosaccharomyces pombe;	PF04135.13	GO:0000469;GO:0042274;GO:0005730;GO:0046872;GO:000452	BP:cleavage involved in rRNA processing;BP:ribosomal small subunit biogenesis;CC:nucleolus;MF:metal ion binding;MF:endoribonuclease activity;	K11883	NOB1	map03008	Ribosome biogenesis in eukaryotes
FVER_11837	CVK83752.1	probable replication licensing factor MCM4 [Fusarium mangiferae]	sp|P29458|MCM4_SCHPO;	DNA replication licensing factor mcm4 OS=Schizosaccharomyces pombe;	PF00493.24;PF17207.4;PF17855.2;PF14551.7;PF07728.15;PF01078.22	GO:0006270;GO:0051301;GO:0042555;GO:0005634;GO:0003677;GO:0003678;GO:000552	BP:DNA replication initiation;BP:cell division;CC:MCM complex;CC:nucleus;MF:DNA binding;MF:DNA helicase activity;MF:ATP binding;	K02212	MCM4, CDC54	map04111;map04113;map03030	Cell cycle - yeast;Meiosis - yeast;DNA replication
FVER_11865	KAF4332732.1	pre-mRNA-processing factor 19 [Fusarium beomiforme]	sp|O14011|PRP19_SCHPO;	Pre-mRNA-processing factor 19 OS=Schizosaccharomyces pombe;	PF08606.12;PF12894.8;PF08662.12;PF04053.15	GO:0000398;GO:0006281;GO:0000974;GO:006163	BP:mRNA splicing, via spliceosome;BP:DNA repair;CC:Prp19 complex;MF:ubiquitin protein ligase activity;	K10599	PRPF19, PRP19	map04120;map03040	Ubiquitin mediated proteolysis;Spliceosome
FVER_11872	EXK90242.1	ATP-dependent RNA helicase DBP2 [Fusarium oxysporum f. sp. raphani 54005]	sp|Q4IF76|DBP2_GIBZE;	ATP-dependent RNA helicase DBP2 OS=Gibberella zeae;	PF00270.30;PF00271.32;PF04851.16	GO:0034354;GO:0097053;GO:0019805;GO:0043420;GO:0006569;GO:0005737;GO:0016021;GO:0030429;GO:0004386;GO:0030170;GO:0003676;GO:000552	BP:'de novo' NAD biosynthetic process from tryptophan;BP:L-kynurenine catabolic process;BP:quinolinate biosynthetic process;BP:anthranilate metabolic process;BP:tryptophan catabolic process;CC:cytoplasm;CC:integral component of membrane;MF:kynureninase activity;MF:helicase activity;MF:pyridoxal phosphate binding;MF:nucleic acid binding;MF:ATP binding;	K12823	DDX5, DBP2	map03040	Spliceosome
FVER_11901	PNP80006.1	hypothetical protein FNYG_06703 [Fusarium nygamai]	sp|Q9UTK3|NPT1_SCHPO;	Probable nicotinate phosphoribosyltransferase OS=Schizosaccharomyces pombe;	PF04095.17;PF17767.2	GO:0001302;GO:0006348;GO:0000183;GO:0009435;GO:0019358;GO:0005634;GO:0000781;GO:0004516;GO:000451	BP:replicative cell aging;BP:chromatin silencing at telomere;BP:chromatin silencing at rDNA;BP:NAD biosynthetic process;BP:nicotinate nucleotide salvage;CC:nucleus;CC:chromosome, telomeric region;MF:nicotinate phosphoribosyltransferase activity;MF:nicotinate-nucleotide diphosphorylas;	K00763	pncB, NAPRT1	map00760	Nicotinate and nicotinamide metabolism
FVER_11957	XP_018234906.1	glycyl-tRNA synthetase [Fusarium oxysporum f. sp. lycopersici 4287]	sp|P38088|SYG_YEAST;	Glycine--tRNA ligase 1, mitochondrial OS=Saccharomyces cerevisiae;	PF03129.21;PF00587.26	GO:0006426;GO:0005737;GO:0004820;GO:000552	BP:glycyl-tRNA aminoacylation;CC:cytoplasm;MF:glycine-tRNA ligase activity;MF:ATP binding;	K01880	GARS, glyS1	map00970	Aminoacyl-tRNA biosynthesis
FVER_11972	XP_018234534.1	cohesin complex subunit SA-1/2 [Fusarium oxysporum f. sp. lycopersici 4287]	sp|O13816|SCC3_SCHPO;	Cohesin subunit psc3 OS=Schizosaccharomyces pombe;	PF08514.12;PF13646.7	------	------	K06671	STAG1_2, SCC3, IRR1	map04111;map04113	Cell cycle - yeast;Meiosis - yeast
FVER_11979	KAF4494696.1	DNA-directed RNA polymerase III subunit RPC6 [Fusarium agapanthi]	sp|O94553|RPC6_SCHPO;	Probable DNA-directed RNA polymerase III subunit rpc6 OS=Schizosaccharomyces pombe;	PF05158.13;PF08784.12	GO:0006383;GO:0005666;GO:000389	BP:transcription from RNA polymerase III promoter;CC:DNA-directed RNA polymerase III complex;MF:DNA-directed RNA polymerase activity;	K03025	RPC6, POLR3F	map03020	RNA polymerase
FVER_12023	XP_023427954.1	related to acid sphingomyelinase [Fusarium fujikuroi IMI 58289]	sp|Q54C16|SGMB_DICDI;	Sphingomyelin phosphodiesterase B OS=Dictyostelium discoideum OX=44689 GN=sgmB PE=3 SV=1;	PF00149.29	GO:0006685;GO:0046872;GO:0004767;GO:001679	BP:sphingomyelin catabolic process;MF:metal ion binding;MF:sphingomyelin phosphodiesterase activity;MF:hydrolase activity, acting on glycosyl bonds;	K12350	SMPD1, ASM	map00600	Sphingolipid metabolism
FVER_12086	CVK84281.1	related to small nucleolar ribonucleoprotein [Fusarium mangiferae]	sp|O13878|UTP17_SCHPO;	U3 small nucleolar RNA-associated protein 17 OS=Schizosaccharomyces pombe;	PF00400.33	------	------	K14552	NAN1, UTP17, WDR75	map03008	Ribosome biogenesis in eukaryotes
FVER_12091	XP_031067341.1	DNA ligase 1 [Fusarium oxysporum f. sp. cubense tropical race 4 54006]	sp|P12000|DNLI1_SCHPO;	DNA ligase 1 OS=Schizosaccharomyces pombe;	PF01068.22;PF04675.15;PF04679.16;PF09414.11	GO:0006310;GO:0051103;GO:0006260;GO:0071897;GO:0005524;GO:0003910;GO:000367	BP:DNA recombination;BP:DNA ligation involved in DNA repair;BP:DNA replication;BP:DNA biosynthetic process;MF:ATP binding;MF:DNA ligas;MF:DNA binding;	K10747	LIG1	map03430;map03410;map03420;map03030	Mismatch repair;Base excision repair;Nucleotide excision repair;DNA replication
FVER_12193	XP_023423737.1	probable chorismate synthase/flavin reductase, NADPH-dependent [Fusarium fujikuroi IMI 58289]	sp|Q12640|AROC_NEUCR;	Chorismate synthase OS=Neurospora crassa;	PF01264.22	GO:0009423;GO:0009073;GO:000410	BP:chorismate biosynthetic process;BP:aromatic amino acid family biosynthetic process;MF:chorismate synthase activity;	K01736	aroC	map00400	Phenylalanine, tyrosine and tryptophan biosynthesis
FVER_12312	PNP77926.1	hypothetical protein FNYG_08652 [Fusarium nygamai]	------	------	------	------	------	K14285	NXT1_2, P15	map03008;map03015;map03013	Ribosome biogenesis in eukaryotes;mRNA surveillance pathway;RNA transport
FVER_12362	XP_018751659.1	amidophosphoribosyltransferase [Fusarium verticillioides 7600]	sp|P04046|PUR1_YEAST;	Amidophosphoribosyltransferase OS=Saccharomyces cerevisiae;	PF13522.7;PF13537.7;PF00156.28	GO:0009113;GO:0006189;GO:0009116;GO:0004044;GO:004687	BP:purine nucleobase biosynthetic process;BP:'de novo' IMP biosynthetic process;BP:nucleoside metabolic process;MF:amidophosphoribosyltransferase activity;MF:metal ion binding;	K00764	purF, PPAT	map00250;map00230	Alanine, aspartate and glutamate metabolism;Purine metabolism
FVER_12365	KLP04657.1	signal recognition particle receptor alpha subunit (SRP receptor alpha-subunit) [Fusarium fujikuroi]	sp|O43032|SRPR_SCHPO;	Signal recognition particle receptor subunit alpha homolog OS=Schizosaccharomyces pombe;	PF04086.14;PF00448.23;PF02881.20;PF03308.17;PF13604.7	GO:0006614;GO:0005785;GO:0005047;GO:0003924;GO:000552	BP:SRP-dependent cotranslational protein targeting to membrane;CC:signal recognition particle receptor complex;MF:signal recognition particle binding;MF:GTPase activity;MF:GTP binding;	K13431	SRPR	map03060	Protein export
FVER_12367	XP_018249529.1	ribose-phosphate pyrophosphokinase [Fusarium oxysporum f. sp. lycopersici 4287]	sp|P32895|KPR1_YEAST;	Ribose-phosphate pyrophosphokinase 1 OS=Saccharomyces cerevisiae;	PF13793.7;PF14572.7;PF00156.28	GO:0009156;GO:0009165;GO:0009116;GO:0016301;GO:0000287;GO:000474	BP:ribonucleoside monophosphate biosynthetic process;BP:nucleotide biosynthetic process;BP:nucleoside metabolic process;MF:kinase activity;MF:magnesium ion binding;MF:ribose phosphate diphosphokinase activity;	K00948	PRPS, prsA	map00030;map00230	Pentose phosphate pathway;Purine metabolism
FVER_12368	KAF4496111.1	18S rRNA biogenesis RCL1 [Fusarium agapanthi]	sp|Q08096|RCL1_YEAST;	RNA 3'-terminal phosphate cyclase-like protein OS=Saccharomyces cerevisiae;	PF01137.22;PF05189.14	GO:0042254;GO:0006396;GO:0005730;GO:000382	BP:ribosome biogenesis;BP:RNA processing;CC:nucleolus;MF:catalytic activity;	K11108	RCL1	map03008	Ribosome biogenesis in eukaryotes
FVER_12374	QKD48037.1	long-chain acyl-CoA synthetase, partial [Fusarium oxysporum Fo47]	sp|Q8LPS1|LACS6_ARATH;	Long chain acyl-CoA synthetase 6, peroxisomal OS=Arabidopsis thaliana OX=3702 GN=LACS6 PE=1 SV=1;	PF00501.29	GO:0003824;GO:001687	MF:catalytic activity;MF:ligase activity;	K01897	ACSL, fadD	map04146;map00061;map00071	Peroxisome;Fatty acid biosynthesis;Fatty acid degradation
FVER_12510	RBA12194.1	syntaxin 1B/2/3 [Fusarium proliferatum]	sp|Q9USH7|PSY1_SCHPO;	Syntaxin-like protein psy1 OS=Schizosaccharomyces pombe;	PF00804.26;PF05739.20;PF14523.7	GO:0016192;GO:001602	BP:vesicle-mediated transport;CC:integral component of membrane;	K08486	STX1B_2_3	map04130	SNARE interactions in vesicular transport
FVER_12536	RKL28097.1	hypothetical protein BFJ72_g12681 [Fusarium proliferatum]	sp|Q9URT2|YJU3_SCHPO;	Uncharacterized protein P25A2.03 OS=Schizosaccharomyces pombe;	PF11957.9;PF00625.22;PF13238.7;PF01926.24	------	------	K12878	THOC1	map03013;map03040	RNA transport;Spliceosome
FVER_12632	XP_023430019.1	related to POX1-acyl-CoA oxidase [Fusarium fujikuroi IMI 58289]	sp|O65202|ACOX1_ARATH;	Peroxisomal acyl-coenzyme A oxidase 1 OS=Arabidopsis thaliana OX=3702 GN=ACX1 PE=1 SV=1;	PF01756.20;PF14749.7;PF02770.20;PF00441.25	GO:0006635;GO:0005777;GO:0003997;GO:0050660;GO:007194	BP:fatty acid beta-oxidation;CC:peroxisome;MF:acyl-CoA oxidase activity;MF:flavin adenine dinucleotide binding;MF:FAD binding;	K00232	E1.3.3.6, ACOX1, ACOX3	map00640;map00592;map01040;map00071;map04146;map00410	Propanoate metabolism;alpha-Linolenic acid metabolism;Biosynthesis of unsaturated fatty acids;Fatty acid degradation;Peroxisome;beta-Alanine metabolism
FVER_12682	XP_031040460.1	minichromosome maintenance protein 6 [Fusarium oxysporum NRRL 32931]	sp|P49731|MCM6_SCHPO;	DNA replication licensing factor mcm6 OS=Schizosaccharomyces pombe;	PF00493.24;PF17207.4;PF18263.2;PF17855.2;PF14551.7;PF01078.22;PF07726.12	GO:0006270;GO:0042555;GO:0005634;GO:0003677;GO:0003678;GO:000552	BP:DNA replication initiation;CC:MCM complex;CC:nucleus;MF:DNA binding;MF:DNA helicase activity;MF:ATP binding;	K02542	MCM6	map04111;map04113;map03030	Cell cycle - yeast;Meiosis - yeast;DNA replication
FVER_12684	XP_023426046.1	related to 3-hydroxyisobutyrate dehydrogenase [Fusarium fujikuroi IMI 58289]	sp|Q54CX6|3HIDH_DICDI;	Probable 3-hydroxyisobutyrate dehydrogenase, mitochondrial OS=Dictyostelium discoideum OX=44689 GN=hibA PE=3 SV=1;	PF03446.16;PF14833.7;PF03807.18;PF02423.16;PF00056.24	GO:0006574;GO:0051287;GO:0050661;GO:000844	BP:valine catabolic process;MF:NAD binding;MF:NADP binding;MF:3-hydroxyisobutyrate dehydrogenase activity;	K00020	HIBADH, mmsB	map00280	Valine, leucine and isoleucine degradation
FVER_12803	RBA22670.1	asparaginyl-tRNA synthetase [Fusarium proliferatum]	sp|Q6ANL4|SYN_DESPS;	Asparagine--tRNA ligase OS=Desulfotalea psychrophila;	PF00152.21	GO:0006421;GO:0003676;GO:0005524;GO:000481	BP:asparaginyl-tRNA aminoacylation;MF:nucleic acid binding;MF:ATP binding;MF:asparagine-tRNA ligase activity;	K01893	NARS, asnS	map00970	Aminoacyl-tRNA biosynthesis
FVER_12809	KAF4427942.1	alkaline phosphatase D [Fusarium acutatum]	sp|P40383|XRN1_SCHPO;	5'-3' exoribonuclease 1 OS=Schizosaccharomyces pombe;	PF17846.2;PF03159.19;PF18332.2;PF18334.2;PF18194.2;PF18129.2	GO:0000956;GO:0000184;GO:0005737;GO:0010494;GO:0000932;GO:0008409;GO:0004534;GO:0000287;GO:0003723;GO:000367	BP:nuclear-transcribed mRNA catabolic process;BP:nuclear-transcribed mRNA catabolic process, nonsense-mediated decay;CC:cytoplasm;CC:cytoplasmic stress granule;CC:cytoplasmic mRNA processing body;MF:5'-3' exonuclease activity;MF:5'-3' exoribonuclease activity;MF:magnesium ion binding;MF:RNA binding;MF:nucleic acid binding;	K12618	XRN1, SEP1, KEM1	map03018;map03008	RNA degradation;Ribosome biogenesis in eukaryotes
FVER_12851	XP_018237804.1	2-methylcitrate dehydratase [Fusarium oxysporum f. sp. lycopersici 4287]	sp|P77243|PRPD_ECOLI;	2-methylcitrate dehydratase OS=Escherichia coli;	PF03972.15	GO:0019629;GO:0047547;GO:005153	BP:propionate catabolic process, 2-methylcitrate cycle;MF:2-methylcitrate dehydratase activity;MF:2 iron, 2 sulfur cluster binding;	K01720	prpD	map00640	Propanoate metabolism
FVER_12857	CVL05054.1	probable ketopantoate hydroxymethyltransferase [Fusarium proliferatum]	sp|Q9Y7B6|PANB_EMENI;	3-methyl-2-oxobutanoate hydroxymethyltransferase OS=Emericella nidulans;	PF02548.16;PF13714.7	GO:0032259;GO:0015940;GO:0008168;GO:000386	BP:methylation;BP:pantothenate biosynthetic process;MF:methyltransferase activity;MF:3-methyl-2-oxobutanoate hydroxymethyltransferase activity;	K00606	panB	map00770	Pantothenate and CoA biosynthesis
FVER_12875	XP_031087640.1	probable bifunctional purine biosynthetic protein [Fusarium proliferatum ET1]	sp|Q99148|PUR2_YARLI;	Bifunctional purine biosynthetic protein ADE1 OS=Yarrowia lipolytica;	PF01071.20;PF02844.16;PF02769.23;PF02843.17;PF00586.25;PF02786.18	GO:0009113;GO:0006189;GO:0004641;GO:0005524;GO:0046872;GO:000463	BP:purine nucleobase biosynthetic process;BP:'de novo' IMP biosynthetic process;MF:phosphoribosylformylglycinamidine cyclo-ligase activity;MF:ATP binding;MF:metal ion binding;MF:phosphoribosylamine-glycine ligase activity;	K11788	ADE5	map00230	Purine metabolism
FVER_12892	XP_031088724.1	probable acetylglutamate kinase/N-acetyl-gamma-glutamyl-phosphate reductase precursor (ARG-6) [Fusarium proliferatum ET1]	sp|P54898|ARG56_NEUCR;	Protein arg-6, mitochondrial OS=Neurospora crassa;	PF01118.25	GO:0006526;GO:0003942;GO:005128	BP:arginine biosynthetic process;MF:N-acetyl-gamma-glutamyl-phosphate reductase activity;MF:NAD binding;	K12659;nhe;cmt	ARG56;;	map00220	Arginine biosynthesis
FVER_12930	KAF4441851.1	rrna 2 -o-methyltransferase fibrillarin [Fusarium acutatum]	sp|Q9HE26|FBRL_NEUCR;	rRNA 2'-O-methyltransferase fibrillarin OS=Neurospora crassa;	PF01269.18;PF08704.11	GO:0032259;GO:0006364;GO:0008168;GO:000372	BP:methylation;BP:rRNA processing;MF:methyltransferase activity;MF:RNA binding;	K14563	NOP1, FBL	map03008	Ribosome biogenesis in eukaryotes
FVER_12954	KLO85385.1	putative SCF complex member Cullin 1 [Fusarium fujikuroi]	sp|Q13616|CUL1_HUMAN;	Cullin-1 OS=Homo sapiens OX=9606 GN=CUL1 PE=1 SV=2;	PF00888.23;PF10557.10	GO:0006511;GO:0031461;GO:003162	BP:ubiquitin-dependent protein catabolic process;CC:cullin-RING ubiquitin ligase complex;MF:ubiquitin protein ligase binding;	cmt;K03347	;CUL1, CDC53	map04111;map04141;map04120	Cell cycle - yeast;Protein processing in endoplasmic reticulum;Ubiquitin mediated proteolysis
FVER_12976	XP_023424986.1	probable tyrosine--trna ligase precursor, mitochondrial [Fusarium fujikuroi IMI 58289]	sp|P28669|SYYM_PODAS;	Tyrosine--tRNA ligase, mitochondrial OS=Podospora anserina OX=2587412 GN=YTS1 PE=3 SV=1;	PF00579.26;PF16714.6	GO:0006437;GO:0004831;GO:0003723;GO:000552	BP:tyrosyl-tRNA aminoacylation;MF:tyrosine-tRNA ligase activity;MF:RNA binding;MF:ATP binding;	K01866	YARS, tyrS	map00970	Aminoacyl-tRNA biosynthesis
FVER_12981	XP_018238810.1	minichromosome maintenance protein 3 [Fusarium oxysporum f. sp. lycopersici 4287]	sp|P30666|MCM3_SCHPO;	DNA replication licensing factor mcm3 OS=Schizosaccharomyces pombe;	PF00493.24;PF17207.4;PF17855.2;PF14551.7;PF01078.22	GO:0006270;GO:0042555;GO:0005634;GO:0003677;GO:0003678;GO:000552	BP:DNA replication initiation;CC:MCM complex;CC:nucleus;MF:DNA binding;MF:DNA helicase activity;MF:ATP binding;	K02541	MCM3	map04111;map04113;map03030	Cell cycle - yeast;Meiosis - yeast;DNA replication
FVER_13026	EXL00686.1	histidyl-tRNA synthetase [Fusarium oxysporum f. sp. raphani 54005]	sp|O43011|SYH_SCHPO;	Histidine--tRNA ligase, mitochondrial OS=Schizosaccharomyces pombe;	PF13393.7;PF03129.21;PF12745.8;PF00587.26	GO:0006427;GO:0005737;GO:0004821;GO:000552	BP:histidyl-tRNA aminoacylation;CC:cytoplasm;MF:histidine-tRNA ligase activity;MF:ATP binding;	K01892	HARS, hisS	map00970	Aminoacyl-tRNA biosynthesis
FVER_13040	RKL45750.1	hypothetical protein BFJ72_g3295 [Fusarium proliferatum]	sp|Q83P19|HPCH_SHIFL;	4-hydroxy-2-oxo-heptane-1,7-dioate aldolase OS=Shigella flexneri OX=623 GN=hpcH PE=3 SV=1;	PF03328.15	GO:000382	MF:catalytic activity;	K02510	hpaI, hpcH	map00350	Tyrosine metabolism
FVER_13096	RKL35394.1	hypothetical protein BFJ72_g8913 [Fusarium proliferatum]	sp|Q12265|KPR5_YEAST;	Ribose-phosphate pyrophosphokinase 5 OS=Saccharomyces cerevisiae;	PF14572.7;PF13793.7;PF00156.28	GO:0009165;GO:0009116;GO:0004749;GO:0000287;GO:001630	BP:nucleotide biosynthetic process;BP:nucleoside metabolic process;MF:ribose phosphate diphosphokinase activity;MF:magnesium ion binding;MF:kinase activity;	K00948	PRPS, prsA	map00030;map00230	Pentose phosphate pathway;Purine metabolism
FVER_13109	TVY69970.1	Lipoamide acyltransferase component of branched-chain alpha-keto acid dehydrogenase complex [Fusarium oxysporum f. sp. cubense]	sp|P53395|ODB2_MOUSE;	Lipoamide acyltransferase component of branched-chain alpha-keto acid dehydrogenase complex, mitochondrial OS=Mus musculus OX=10090 GN=Dbt PE=1 SV=2;	PF00198.24;PF00364.23;PF02817.18	GO:001674	MF:transferase activity, transferring acyl groups;	K09699	DBT, bkdB	map00280;map00640	Valine, leucine and isoleucine degradation;Propanoate metabolism
FVER_13122	XP_031075863.1	uncharacterized protein FPRO_00607 [Fusarium proliferatum ET1]	sp|O66690|SYP_AQUAE;	Proline--tRNA ligase OS=Aquifex aeolicus;	PF00587.26;PF03129.21	GO:0006457;GO:0006433;GO:0005737;GO:0016272;GO:0004827;GO:0051082;GO:000552	BP:protein folding;BP:prolyl-tRNA aminoacylation;CC:cytoplasm;CC:prefoldin complex;MF:proline-tRNA ligase activity;MF:unfolded protein binding;MF:ATP binding;	K01881	PARS, proS	map00970	Aminoacyl-tRNA biosynthesis
FVER_13150	XP_031082115.1	probable nucleolar protein NOP58 [Fusarium proliferatum ET1]	sp|Q0CQH1|NOP58_ASPTN;	Nucleolar protein 58 OS=Aspergillus terreus;	PF01798.19;PF08156.14	GO:0000472;GO:1902570;GO:0000447;GO:0000480;GO:0032040;GO:0031428;GO:001706	BP:endonucleolytic cleavage to generate mature 5'-end of SSU-rRNA fro;BP:protein localization to nucleolus;BP:endonucleolytic cleavage in ITS1 to separate SSU-rRNA from 5.8S rRNA and LSU-rRNA from tricistronic rRNA transcrip;BP:endonucleolytic cleavage in 5'-ETS of tricistronic rRNA transcrip;CC:small-subunit processome;CC:box C/D snoRNP complex;MF:snRNA binding;	K14565	NOP58	map03008	Ribosome biogenesis in eukaryotes
FVER_13165	RKL35074.1	hypothetical protein BFJ72_g9073 [Fusarium proliferatum]	sp|P10356|YEY2_YEAST;	Uncharacterized protein YER152C OS=Saccharomyces cerevisiae;	PF09507.11	GO:0006260;GO:004362	BP:DNA replication;CC:delta DNA polymerase complex;	K03504	POLD3	map03430;map03440;map03410;map03420;map03030	Mismatch repair;Homologous recombination;Base excision repair;Nucleotide excision repair;DNA replication
FVER_13174	CVK89051.1	related to ubiquitin-conjugating enzyme E2-18 kDa [Fusarium mangiferae]	sp|Q4VBH4|UB2WA_DANRE;	Probable ubiquitin-conjugating enzyme E2 W-A OS=Danio rerio OX=7955 GN=ube2wa PE=2 SV=2;	PF00179.27;PF14461.7;PF05743.14	------	------	K10688	UBE2W, UBC16	map04120	Ubiquitin mediated proteolysis
FVER_13230	EWZ48557.1	cysteinyl-tRNA synthetase [Fusarium oxysporum Fo47]	sp|Q09860|SYC_SCHPO;	Probable cysteine--tRNA ligase OS=Schizosaccharomyces pombe;	PF01406.20;PF09334.12;PF09190.12	GO:0006423;GO:0004817;GO:000552	BP:cysteinyl-tRNA aminoacylation;MF:cysteine-tRNA ligase activity;MF:ATP binding;	K01883	CARS, cysS	map00970	Aminoacyl-tRNA biosynthesis
FVER_13295	XP_018241906.1	acetyl-CoA acyltransferase [Fusarium oxysporum f. sp. lycopersici 4287]	sp|Q05493|THIK_YARLI;	3-ketoacyl-CoA thiolase, peroxisomal OS=Yarrowia lipolytica;	PF00108.24;PF02803.19	GO:0006635;GO:0005782;GO:0005758;GO:0016747;GO:0003988;GO:000372	BP:fatty acid beta-oxidation;CC:peroxisomal matrix;CC:mitochondrial intermembrane space;MF:transferase activity, transferring acyl groups other than amino-acyl groups;MF:acetyl-CoA C-acyltransferase activity;MF:mRNA binding;	K07513	ACAA1	map04146;map00592;map00280;map01040;map00071	Peroxisome;alpha-Linolenic acid metabolism;Valine, leucine and isoleucine degradation;Biosynthesis of unsaturated fatty acids;Fatty acid degradation
FVER_13396	KAF4501517.1	eukaryotic translation initiation factor 3 subunit C [Fusarium agapanthi]	sp|A4QSX4|EIF3C_MAGO7;	Eukaryotic translation initiation factor 3 subunit C OS=Magnaporthe oryzae;	PF05470.13;PF01399.28	GO:0001732;GO:0005852;GO:0016282;GO:0033290;GO:0031369;GO:000374	BP:formation of cytoplasmic translation initiation complex;CC:eukaryotic translation initiation factor 3 complex;CC:eukaryotic 43S preinitiation complex;CC:eukaryotic 48S preinitiation complex;MF:translation initiation factor binding;MF:translation initiation factor activity;	K03252	EIF3C	map03013	RNA transport
FVER_13412	XP_023424712.1	probable cis-prenyltransferase [Fusarium fujikuroi IMI 58289]	sp|O14171|YE54_SCHPO;	Dehydrodolichyl diphosphate synthase complex subunit SPAC4D7.04c OS=Schizosaccharomyces pombe;	PF01255.20	GO:0019408;GO:0016765;GO:004554	BP:dolichol biosynthetic process;MF:transferase activity, transferring alkyl or ary;MF:dehydrodolichyl diphosphate synthase activity;	K11778	DHDDS, RER2, SRT1	map00900	Terpenoid backbone biosynthesis
FVER_13435	SCN77896.1	related to SMC3-required for structural maintenance of chromosomes [Fusarium fujikuroi]	sp|Q00737|SUDA_EMENI;	Chromosome segregation protein sudA OS=Emericella nidulans;	PF02463.20;PF06470.14;PF13175.7;PF13476.7;PF13304.7;PF13558.7	GO:0051276;GO:0005634;GO:0005694;GO:000552	BP:chromosome organization;CC:nucleus;CC:chromosome;MF:ATP binding;	K06669;nhe	SMC3, CSPG6;	map04111;map04113	Cell cycle - yeast;Meiosis - yeast
FVER_13500	RBA15188.1	glycine cleavage system T protein [Fusarium proliferatum]	sp|O14110|GCST_SCHPO;	Probable aminomethyltransferase, mitochondrial OS=Schizosaccharomyces pombe;	PF01571.22;PF08669.12	GO:0006730;GO:0006546;GO:0032259;GO:0005739;GO:0004047;GO:0004375;GO:000848	BP:one-carbon metabolic process;BP:glycine catabolic process;BP:methylation;CC:mitochondrion;MF:aminomethyltransferase activity;MF:glycine dehydrogenas;MF:transaminase activity;	K00605	gcvT, AMT	map00630;map00670;map00260	Glyoxylate and dicarboxylate metabolism;One carbon pool by folate;Glycine, serine and threonine metabolism
FVER_13603	XP_018746649.1	chitin synthase 1 [Fusarium verticillioides 7600]	sp|P29070|CHS1_NEUCR;	Chitin synthase 1 OS=Neurospora crassa;	PF01644.18;PF08407.12;PF03142.16;PF13632.7;PF13641.7	GO:0006031;GO:0071555;GO:0016021;GO:0005886;GO:000410	BP:chitin biosynthetic process;BP:cell wall organization;CC:integral component of membrane;CC:plasma membrane;MF:chitin synthase activity;	K00698	CHS1	map00520	Amino sugar and nucleotide sugar metabolism
FVER_13632	KLO87351.1	DNA-directed DNA polymerase lambda [Fusarium fujikuroi]	sp|Q5RKI3|DPOLL_RAT;	DNA polymerase lambda OS=Rattus norvegicus OX=10116 GN=Poll PE=2 SV=1;	PF14792.7;PF14791.7;PF10391.10;PF14716.7	GO:0006281;GO:0003887;GO:000367	BP:DNA repair;MF:DNA-directed DNA polymerase activity;MF:DNA binding;	K10981	POL4	map03450	Non-homologous end-joining
FVER_13653	XP_023428135.1	probable glycogen synthase [Fusarium fujikuroi IMI 58289]	sp|O93869|GYS_NEUCR;	Glycogen [starch] synthase OS=Neurospora crassa;	PF05693.14;PF08323.12;PF13439.7;PF00534.21;PF13579.7	GO:0005978;GO:000437	BP:glycogen biosynthetic process;MF:glycoge;	K00693	GYS	map00500	Starch and sucrose metabolism
FVER_13666	XP_018761916.1	hypothetical protein FVEG_13676 [Fusarium verticillioides 7600]	sp|Q9HDX2|YKN3_SCHPO;	Uncharacterized lactate 2-monooxygenase PB1A11.03 OS=Schizosaccharomyces pombe;	PF01070.19;PF00201.19;PF00478.26	GO:0016758;GO:0016491;GO:001018	MF:transferase activity, transferring hexosyl groups;MF:oxidoreductase activity;MF:FMN binding;	K00467	E1.13.12.4	map00620	Pyruvate metabolism
FVER_13691	RBA09618.1	ribonuclease Z [Fusarium proliferatum]	sp|Q10155|RNZ1_SCHPO;	Ribonuclease Z 1 OS=Schizosaccharomyces pombe;	PF13691.7;PF12706.8;PF00753.28	GO:000803	BP:tRNA processing;	K00784	rnz	map03013	RNA transport
FVER_13718	QGI64536.1	hypothetical protein CEK27_008507 [Fusarium fujikuroi]	sp|Q6C0I0|SNU13_YARLI;	13 kDa ribonucleoprotein-associated protein OS=Yarrowia lipolytica;	PF01248.27;PF08228.12;PF15608.7	GO:0042254;GO:0005730;GO:1990904;GO:000372	BP:ribosome biogenesis;CC:nucleolus;CC:ribonucleoprotein complex;MF:RNA binding;	K12845	SNU13, NHP2L	map03008;map03040	Ribosome biogenesis in eukaryotes;Spliceosome
FVER_13759	XP_023428205.1	probable UGA1-4-aminobutyrate aminotransferase (GABA transaminase) [Fusarium fujikuroi IMI 58289]	sp|P14010|GABAT_EMENI;	4-aminobutyrate aminotransferase OS=Emericella nidulans;	PF00202.22	GO:0009450;GO:0009448;GO:0005829;GO:0030170;GO:000386	BP:gamma-aminobutyric acid catabolic process;BP:gamma-aminobutyric acid metabolic process;CC:cytosol;MF:pyridoxal phosphate binding;MF:4-aminobutyrate transaminase activity;	K13524	ABAT	map00640;map00250;map00280;map00410;map00650	Propanoate metabolism;Alanine, aspartate and glutamate metabolism;Valine, leucine and isoleucine degradation;beta-Alanine metabolism;Butanoate metabolism
FVER_13775	EXM34732.1	3-methylcrotonyl-CoA carboxylase alpha subunit [Fusarium oxysporum f. sp. vasinfectum 25433]	sp|Q96RQ3|MCCA_HUMAN;	Methylcrotonoyl-CoA carboxylase subunit alpha, mitochondrial OS=Homo sapiens OX=9606 GN=MCCC1 PE=1 SV=3;	PF02786.18;PF00289.23;PF02785.20;PF00364.23;PF13533.7;PF02222.23;PF07478.14	GO:0046872;GO:0016874;GO:000552	MF:metal ion binding;MF:ligase activity;MF:ATP binding;	K01968	E6.4.1.4A	map00280	Valine, leucine and isoleucine degradation
FVER_13778	XP_018243717.1	hypothetical protein FOXG_07874 [Fusarium oxysporum f. sp. lycopersici 4287]	sp|A6Y9S5|LGA1_HYPJE;	L-threo-3-deoxy-hexylosonate aldolase OS=Hypocrea jecorina OX=51453 GN=lga1 PE=1 SV=1;	PF00701.23	GO:001682	MF:lyase activity;	K18103	GAAC, LGA1	map00040	Pentose and glucuronate interconversions
FVER_13792	XP_018749813.1	hypothetical protein FVEG_05017 [Fusarium verticillioides 7600]	sp|P55809|SCOT1_HUMAN;	Succinyl-CoA:3-ketoacid coenzyme A transferase 1, mitochondrial OS=Homo sapiens OX=9606 GN=OXCT1 PE=1 SV=1;	PF01144.24	GO:0046952;GO:0005739;GO:000826	BP:ketone body catabolic process;CC:mitochondrion;MF:3-oxoacid CoA-transferase activity;	K01027	OXCT	map00280;map00072;map00650	Valine, leucine and isoleucine degradation;Synthesis and degradation of ketone bodies;Butanoate metabolism
FVER_13830	XP_018745168.1	translation initiation factor 1A [Fusarium verticillioides 7600]	sp|Q6GVM3|IF1AY_PANTR;	Eukaryotic translation initiation factor 1A, Y-chromosomal OS=Pan troglodytes OX=9598 GN=EIF1AY PE=2 SV=3;	PF01176.20	GO:000374	MF:translation initiation factor activity;	K03236	EIF1A	map03013	RNA transport
FVER_13850	XP_023426119.1	probable isopentenyl-diphosphate delta-isomerase [Fusarium fujikuroi IMI 58289]	sp|Q10132|IDI1_SCHPO;	Isopentenyl-diphosphate Delta-isomerase OS=Schizosaccharomyces pombe;	PF00293.29	GO:0008299;GO:0016787;GO:000445	BP:isoprenoid biosynthetic process;MF:hydrolase activity;MF:isopentenyl-diphosphate delta-isomerase activity;	K01823	idi, IDI	map00900	Terpenoid backbone biosynthesis
FVER_13851	KAF4438328.1	ribonuclease P subunit POP4 [Fusarium acutatum]	sp|Q5R7B0|RPP29_PONAB;	Ribonuclease P protein subunit p29 OS=Pongo abelii OX=9601 GN=POP4 PE=2 SV=1;	PF01868.17	GO:0008033;GO:0001682;GO:0030677;GO:0005634;GO:0004526;GO:0004540;GO:000372	BP:tRNA processing;BP:tRNA 5'-leader removal;CC:ribonuclease P complex;CC:nucleus;MF:ribonuclease P activity;MF:ribonuclease activity;MF:RNA binding;	K03538	POP4, RPP29	map03008;map03013	Ribosome biogenesis in eukaryotes;RNA transport
FVER_13875	XP_018232709.1	U6 snRNA-associated Sm-like protein LSm6 [Fusarium oxysporum f. sp. lycopersici 4287]	sp|Q2HAN0|LSM6_CHAGB;	U6 snRNA-associated Sm-like protein LSm6 OS=Chaetomium globosum;	PF01423.23;PF14438.7	GO:0030490;GO:0000398;GO:0046540;GO:0005732;GO:0005730;GO:0000932;GO:1990726;GO:0005688;GO:0005681;GO:000372	BP:maturation of SSU-rRNA;BP:mRNA splicing, via spliceosome;CC:U4/U6 x U5 tri-snRNP complex;CC:small nucleolar ribonucleoprotein complex;CC:nucleolus;CC:cytoplasmic mRNA processing body;CC:Lsm1-7-Pat1 complex;CC:U6 snRNP;CC:spliceosomal complex;MF:RNA binding;	K12625	LSM6	map03018;map03040	RNA degradation;Spliceosome
FVER_13938	KAF4444488.1	orotate phosphoribosyltransferase [Fusarium acutatum]	sp|O42767|PYRE_METAN;	Orotate phosphoribosyltransferase OS=Metarhizium anisopliae OX=5530 GN=URA5 PE=3 SV=1;	PF00156.28	GO:0006221;GO:0009116;GO:000458	BP:pyrimidine nucleotide biosynthetic process;BP:nucleoside metabolic process;MF:orotate phosphoribosyltransferase activity;	K00762	pyrE	map00240	Pyrimidine metabolism
FVER_13947	CVL10368.1	related to glutamate-1-semialdehyde 2,1-aminomutase [Fusarium proliferatum]	sp|O94492|YC7B_SCHPO;	Uncharacterized aminotransferase C417.11c OS=Schizosaccharomyces pombe;	PF00202.22	GO:0008483;GO:003017	MF:transaminase activity;MF:pyridoxal phosphate binding;	K01845	hemL	map00860	Porphyrin and chlorophyll metabolism
FVER_13961	CVK89359.1	related to pre-mRNA splicing factor U2AF large chain [Fusarium mangiferae]	sp|P26368|U2AF2_HUMAN;	Splicing factor U2AF 65 kDa subunit OS=Homo sapiens OX=9606 GN=U2AF2 PE=1 SV=4;	PF00076.23	GO:0008380;GO:0006397;GO:0005634;GO:000372	BP:RNA splicing;BP:mRNA processing;CC:nucleus;MF:RNA binding;	K12837	U2AF2	map03040	Spliceosome
FVER_14008	XP_031079903.1	probable FAP7-involved in the oxidative stress response [Fusarium proliferatum ET1]	sp|Q8TG40|KAD6_CANAL;	Adenylate kinase isoenzyme 6 homolog HBR1 OS=Candida albicans;	PF13238.7;PF13207.7;PF00004.30;PF13521.7;PF13671.7;PF00406.23;PF03266.16	GO:0006364;GO:0005737;GO:0005634;GO:0004017;GO:0016887;GO:000552	BP:rRNA processing;CC:cytoplasm;CC:nucleus;MF:adenylate kinase activity;MF:ATPase activity;MF:ATP binding;	K18532	AK6, FAP7	map03008;map00230	Ribosome biogenesis in eukaryotes;Purine metabolism
FVER_14047	CVK83149.1	uncharacterized protein FMAN_00715 [Fusarium mangiferae]	sp|P0C7N7|RFC2_PHANO;	Replication factor C subunit 2 OS=Phaeosphaeria nodorum;	PF08542.12;PF00004.30;PF13177.7;PF03215.16;PF13191.7;PF16193.6;PF05496.13;PF13401.7;PF13086.7;PF06144.14	------	------	K10755	RFC2_4	map03430;map03420;map03030	Mismatch repair;Nucleotide excision repair;DNA replication
FVER_14086	SCV29060.1	probable Double Strand Break repair protein mus-11 [Fusarium fujikuroi]	sp|Q9HGI2|RAD52_NEUCR;	DNA repair and recombination protein mus-11 OS=Neurospora crassa;	PF04098.16	GO:0000730;GO:0045002;GO:000563	BP:DNA recombinase assembly;BP:double-strand break repair via single-strand annealing;CC:nucleus;	K10873	RAD52	map03440	Homologous recombination
FVER_14106	XP_031070009.1	uncharacterized protein FOIG_02825 [Fusarium oxysporum f. sp. cubense tropical race 4 54006]	sp|P36519|RM07_YEAST;	54S ribosomal protein L7, mitochondrial OS=Saccharomyces cerevisiae;	PF00673.22;PF00281.20	GO:0006412;GO:0005840;GO:000373	BP:translation;CC:ribosome;MF:structural constituent of ribosome;	K02931	RP-L5, MRPL5, rplE	map03010	Ribosome
FVER_14116	XP_031085147.1	uncharacterized protein FPRO_14366 [Fusarium proliferatum ET1]	sp|Q54DL6|Y2140_DICDI;	SET and MYND domain-containing protein DDB_G0292140 OS=Dictyostelium discoideum OX=44689 GN=DDB_G0292140 PE=3 SV=1;	PF00856.29	------	------	K11426	SMYD	map00310	Lysine degradation
FVER_14128	CVL05484.1	uncharacterized protein FMAN_10710 [Fusarium mangiferae]	sp|C8V3N0|ATNN_EMENI;	Aspercryptin biosynthesis cluster-specific transcription regulator atnN OS=Emericella nidulans;	PF11951.9;PF00172.19	GO:0016125;GO:0005634;GO:0016021;GO:0047750;GO:0008270;GO:000098	BP:sterol metabolic process;CC:nucleus;CC:integral component of membrane;MF:cholestenol delta-isomerase activity;MF:zinc ion binding;MF:RNA polymerase II transcription factor activity, sequence-specific DNA binding;	K01824	EBP	map00100	Steroid biosynthesis
FVER_14140	XP_023435893.1	uncharacterized protein FFUJ_09363 [Fusarium fujikuroi IMI 58289]	------	------	PF11905.9	GO:0016021;GO:0003700;GO:002285	CC:integral component of membrane;MF:transcription factor activity, sequence-specific DNA binding;MF:transmembrane transporter activity;	K01620;nhe	ltaE;	map00260	Glycine, serine and threonine metabolism
FVER_14143	XP_023428234.1	protein tyrosine phosphatase-like protein [Fusarium fujikuroi IMI 58289]	sp|O14346|HACD_SCHPO;	Probable very-long-chain;	PF04387.15	GO:0006633;GO:0016021;GO:0005789;GO:0102158;GO:0102343;GO:0102344;GO:0102345;GO:0051213;GO:001649	BP:fatty acid biosynthetic process;CC:integral component of membrane;CC:endoplasmic reticulum membrane;MF:very-long-chain 3-hydroxyacyl-CoA dehydratase activity;MF:3-hydroxy-arachidoyl-CoA dehydratase activity;MF:3-hydroxy-behenoyl-CoA dehydratase activity;MF:3-hydroxy-lignoceroyl-CoA dehydratase activity;MF:dioxygenase activity;MF:oxidoreductase activity;	K10703	HACD, PHS1, PAS2	map01040;map00062	Biosynthesis of unsaturated fatty acids;Fatty acid elongation
FVER_14223	XP_031086778.1	related to dihydrodipicolinate synthase [Fusarium proliferatum ET1]	sp|Q5BD77|HOGA1_EMENI;	Probable 4-hydroxy-2-oxoglutarate aldolase, mitochondrial OS=Emericella nidulans;	PF00701.23	GO:001682	MF:lyase activity;	K18123	HOGA1	map00630;map00330	Glyoxylate and dicarboxylate metabolism;Arginine and proline metabolism
FVER_14234	CVL10927.1	related to histone-lysine N-methyltransferase [Fusarium proliferatum]	sp|Q99MY8|ASH1L_MOUSE;	Histone-lysine N-methyltransferase ASH1L OS=Mus musculus OX=10090 GN=Ash1l PE=1 SV=3;	PF00856.29;PF17907.2	GO:0005634;GO:001802	CC:nucleus;MF:histone-lysine N-methyltransferase activity;	K06101	ASH1L	map00310	Lysine degradation
FVER_14235	XP_023425120.1	probable galactose oxidase precursor [Fusarium fujikuroi IMI 58289]	sp|I1S2N3|GAOA_GIBZE;	Galactose oxidase OS=Gibberella zeae;	PF09118.12;PF00754.26;PF13964.7;PF01344.26;PF07646.16;PF13418.7;PF07250.12	GO:004548	MF:galactose oxidase activity;	K04618	GAOA	map00052	Galactose metabolism
FVER_14297	CVK88899.1	related to UTP13-U3 snoRNP protein [Fusarium mangiferae]	sp|Q9USN3|UTP13_SCHPO;	Probable U3 small nucleolar RNA-associated protein 13 OS=Schizosaccharomyces pombe;	PF08625.12;PF00400.33;PF12894.8	GO:0006364;GO:003204	BP:rRNA processing;CC:small-subunit processome;	K14555	UTP13, TBL3	map03008	Ribosome biogenesis in eukaryotes
FVER_14377	KLO98045.1	AAA family ATPase [Fusarium fujikuroi]	sp|P32794|AFG2_YEAST;	ATPase family gene 2 protein OS=Saccharomyces cerevisiae;	PF00004.30;PF17862.2	GO:000552	MF:ATP binding;	K14575	AFG2, DRG1, SPATA5	map03008	Ribosome biogenesis in eukaryotes
FVER_14382	XP_031079116.1	related to UTP22-U3 snoRNP protein involved in maturation of pre-18S rRNA [Fusarium proliferatum ET1]	sp|O94676|UTP22_SCHPO;	U3 small nucleolar RNA-associated protein 22 OS=Schizosaccharomyces pombe;	PF17406.3;PF17405.3;PF17403.3;PF03813.15;PF17404.3;PF17407.3	GO:0006364;GO:0005730;GO:000372	BP:rRNA processing;CC:nucleolus;MF:RNA binding;	K14544	UTP22, NOL6	map03008	Ribosome biogenesis in eukaryotes
FVER_14413	XP_018234979.1	eukaryotic peptide chain release factor subunit 1 [Fusarium oxysporum f. sp. lycopersici 4287]	sp|O59948|ERF1_PODAS;	Eukaryotic peptide chain release factor subunit 1 OS=Podospora anserina OX=2587412 GN=SU2 PE=3 SV=1;	PF03464.16;PF03465.16;PF03463.16;PF18854.2;PF18859.2	GO:000374	MF:translation release factor activity;	K03265	ETF1, ERF1	map03015	mRNA surveillance pathway
FVER_14441	XP_031037568.1	CMGC/CDK/CDC2 protein kinase [Fusarium oxysporum NRRL 32931]	sp|P54119|CDK1_AJECA;	Cyclin-dependent kinase 1 OS=Ajellomyces capsulatus OX=5037 GN=CDC2 PE=3 SV=1;	PF00069.26;PF07714.18	GO:0004674;GO:000552	MF:protein serine/threonine kinase activity;MF:ATP binding;	K04563	CDC28, CDC2	map04111;map04113;map04011	Cell cycle - yeast;Meiosis - yeast;MAPK signaling pathway - yeast
FVER_14462	CVL00819.1	probable sterol delta 5,6-desaturase [Fusarium mangiferae]	sp|Q7SBB6|ERG3_NEUCR;	Probable Delt;	PF04116.14	GO:0008610;GO:0016021;GO:0005506;GO:001649	BP:lipid biosynthetic process;CC:integral component of membrane;MF:iron ion binding;MF:oxidoreductase activity;	K00227	SC5DL, ERG3	map00100	Steroid biosynthesis
FVER_14480	CVK84780.1	related to UTP4-U3 snoRNP protein [Fusarium mangiferae]	sp|O60161|UTP4_SCHPO;	U3 small nucleolar RNA-associated protein 4 OS=Schizosaccharomyces pombe;	------	------	------	K14548	UTP4, CIRH1A	map03008	Ribosome biogenesis in eukaryotes
FVER_14555	XP_023429250.1	probable NAD binding Rossmann fold oxidoreductase [Fusarium fujikuroi IMI 58289]	sp|P77376|YDGJ_ECOLI;	Uncharacterized oxidoreductase YdgJ OS=Escherichia coli;	PF01408.23	GO:001649	MF:oxidoreductase activity;	K18106	GAAA	map00040	Pentose and glucuronate interconversions
FVER_14585	PNP74691.1	hypothetical protein FNYG_12027 [Fusarium nygamai]	sp|Q8NBZ7|UXS1_HUMAN;	UDP-glucuronic acid decarboxylase 1 OS=Homo sapiens OX=9606 GN=UXS1 PE=1 SV=1;	PF16363.6;PF01370.22;PF01073.20;PF07993.13;PF02719.16;PF04321.18	------	------	K08678	UXS1, uxs	map00520	Amino sugar and nucleotide sugar metabolism
FVER_14600	XP_018232774.1	S-adenosylmethionine synthase [Fusarium oxysporum f. sp. lycopersici 4287]	sp|P48466|METK_NEUCR;	S-adenosylmethionine synthase OS=Neurospora crassa;	PF02773.17;PF02772.17;PF00438.21	GO:0006556;GO:0006730;GO:0006555;GO:0004478;GO:0046872;GO:000552	BP:S-adenosylmethionine biosynthetic process;BP:one-carbon metabolic process;BP:methionine metabolic process;MF:methionine adenosyltransferase activity;MF:metal ion binding;MF:ATP binding;	K00789	metK	map00270	Cysteine and methionine metabolism
FVER_14606	XP_018750333.1	glutathione synthetase [Fusarium verticillioides 7600]	sp|P35669|GSHB_SCHPO;	Glutathione synthetase large chain OS=Schizosaccharomyces pombe;	PF03917.18;PF03199.16	GO:0042803;GO:0000287;GO:0004363;GO:0005524;GO:004329	MF:protein homodimerization activity;MF:magnesium ion binding;MF:glutathione synthase activity;MF:ATP binding;MF:glutathione binding;	K21456	GSS	map00270;map00480	Cysteine and methionine metabolism;Glutathione metabolism
FVER_14622	CVK93331.1	related to aldehyde dehydrogenase [Fusarium mangiferae]	sp|Q6FDF8|BETB_ACIAD;	NAD/NADP-dependent betaine aldehyde dehydrogenase OS=Acinetobacter baylyi;	PF00171.23	GO:001662	MF:oxidoreductase activity, acting on the aldehyde or oxo group of donors, NAD or NADP as acceptor;	K00130	betB, gbsA	map00260	Glycine, serine and threonine metabolism
FVER_14631	CVL01818.1	probable chitin synthase D [Fusarium proliferatum]	sp|P78746|CHSD_ASPFU;	Chitin synthase D OS=Neosartorya fumigata;	PF03142.16;PF13632.7;PF13641.7	GO:0016021;GO:000410	CC:integral component of membrane;MF:chitin synthase activity;	K00698	CHS1	map00520	Amino sugar and nucleotide sugar metabolism
FVER_14666	RKK76867.1	DNA mismatch repair protein MSH3 [Fusarium oxysporum]	sp|Q2HFD4|MSH3_CHAGB;	DNA mismatch repair protein MSH3 OS=Chaetomium globosum;	PF00488.22;PF05192.19;PF01624.21;PF05188.18;PF05190.19	GO:0006298;GO:0005524;GO:003098	BP:mismatch repair;MF:ATP binding;MF:mismatched DNA binding;	K08736	MSH3	map03430	Mismatch repair
FVER_00445	RBR04081.1	hypothetical protein FVER53590_12152 [Fusarium verticillioides]	sp|Q4WLN1|ACON_ASPFU;	Aconitate hydratase, mitochondrial OS=Neosartorya fumigata;	PF00330.21;PF00694.20	GO:0006099;GO:0005739;GO:0003994;GO:0046872;GO:005153	BP:tricarboxylic acid cycle;CC:mitochondrion;MF:aconitate hydratase activity;MF:metal ion binding;MF:4 iron, 4 sulfur cluster binding;	K01681	ACO, acnA	map00020;map00630	Citrate cycle (TCA cycle);Glyoxylate and dicarboxylate metabolism
FVER_00636	XP_023434430.1	related to DNA polymerase Tdt-N [Fusarium fujikuroi IMI 58289]	sp|Q09693|DPO4_SCHPO;	DNA polymerase type-X family protein pol4 OS=Schizosaccharomyces pombe;	PF14791.7;PF10391.10;PF14792.7;PF14716.7	GO:0006281;GO:0005634;GO:0003887;GO:0046872;GO:000367	BP:DNA repair;CC:nucleus;MF:DNA-directed DNA polymerase activity;MF:metal ion binding;MF:DNA binding;	K10981	POL4	map03450	Non-homologous end-joining
FVER_00925	XP_018750299.1	enoyl-CoA hydratase [Fusarium verticillioides 7600]	sp|Q1ZXF1|ECHM_DICDI;	Probable enoyl-CoA hydratase, mitochondrial OS=Dictyostelium discoideum OX=44689 GN=echs1 PE=3 SV=1;	PF00378.21;PF16113.6	GO:000382	MF:catalytic activity;	K07511	ECHS1	map00310;map00640;map00062;map00650;map00380;map00071;map00280;map00410	Lysine degradation;Propanoate metabolism;Fatty acid elongation;Butanoate metabolism;Tryptophan metabolism;Fatty acid degradation;Valine, leucine and isoleucine degradation;beta-Alanine metabolism
FVER_00938	XP_018759383.1	arginase [Fusarium verticillioides 7600]	sp|P33280|ARGI_NEUCR;	Arginase OS=Neurospora crassa;	PF00491.22	GO:0006525;GO:0046872;GO:000405	BP:arginine metabolic process;MF:metal ion binding;MF:arginase activity;	K01476	E3.5.3.1, rocF, arg	map00220;map00330	Arginine biosynthesis;Arginine and proline metabolism
FVER_01590	CVK90990.1	probable FUM1-fumarate hydratase [Fusarium mangiferae]	sp|P55250|FUMH_RHIOR;	Fumarate hydratase, mitochondrial OS=Rhizopus oryzae OX=64495 GN=FUMR PE=3 SV=1;	PF00206.21;PF10415.10	GO:0006099;GO:0006106;GO:0045239;GO:000433	BP:tricarboxylic acid cycle;BP:fumarate metabolic process;CC:tricarboxylic acid cycle enzyme complex;MF:fumarate hydratase activity;	K01679	E4.2.1.2B, fumC, FH	map00020;map00620	Citrate cycle (TCA cycle);Pyruvate metabolism
FVER_01956	XP_018753553.1	alcohol dehydrogenase [Fusarium verticillioides 7600]	sp|Q9P6C8|ADH1_NEUCR;	Alcohol dehydrogenase 1 OS=Neurospora crassa;	PF08240.13;PF00107.27;PF13602.7;PF01262.22	GO:0008270;GO:001649	MF:zinc ion binding;MF:oxidoreductase activity;	K13953	adhP	map00010;map00071;map00350	Glycolysis / Gluconeogenesis;Fatty acid degradation;Tyrosine metabolism
FVER_02082	RBA09131.1	glutamate decarboxylase [Fusarium proliferatum]	sp|E9FCP7|DTXS4_METRA;	L-aspartate decarboxylase dtxS4 OS=Metarhizium robertsii;	PF00282.20;PF01212.22;PF00266.20	GO:0019752;GO:0016831;GO:003017	BP:carboxylic acid metabolic process;MF:carboxy-lyase activity;MF:pyridoxal phosphate binding;	K01580	E4.1.1.15, gadB, gadA, GAD	map00250;map00430;map00410;map00650	Alanine, aspartate and glutamate metabolism;Taurine and hypotaurine metabolism;beta-Alanine metabolism;Butanoate metabolism
FVER_02114	RKL27341.1	Phosphatidylinositol 4-kinase pik1 [Fusarium proliferatum]	sp|Q10366|PIK1_SCHPO;	Phosphatidylinositol 4-kinase pik1 OS=Schizosaccharomyces pombe;	PF00454.28;PF11522.9	GO:0048015;GO:0046854;GO:0016773;GO:001630	BP:phosphatidylinositol-mediated signaling;BP:phosphatidylinositol phosphorylation;MF:phosphotransferase activity, alcohol group as acceptor;MF:kinase activity;	K19801	PI4KB	map04070;map00562	Phosphatidylinositol signaling system;Inositol phosphate metabolism
FVER_02274	XP_023428225.1	probable 5` Pro-FAR isomerase [Fusarium fujikuroi IMI 58289]	sp|Q7RXQ8|HIS4_NEUCR;	1;	PF00977.22	GO:0000105;GO:0005737;GO:000394	BP:histidine biosynthetic process;CC:cytoplasm;MF:1;	K01814	hisA	map00340	Histidine metabolism
FVER_02538	XP_023426711.1	probable FBP1-fructose-1,6-bisphosphatase [Fusarium fujikuroi IMI 58289]	sp|P09201|F16P_YEAST;	Fructose-1,6-bisphosphatase OS=Saccharomyces cerevisiae;	PF00316.21;PF18913.1	GO:0005975;GO:004213	BP:carbohydrate metabolic process;MF:fructose 1,6-bisphosphate 1-phosphatase activity;	K03841	FBP, fbp	map00680;map00010;map00030;map00051	Methane metabolism;Glycolysis / Gluconeogenesis;Pentose phosphate pathway;Fructose and mannose metabolism
FVER_03092	XP_031077974.1	related to acyl-CoA dehydrogenase, medium-chain specific, mitochondrial precursor [Fusarium proliferatum ET1]	sp|Q8X1D8|NAO_FUSOX;	Nitroalkane oxidase OS=Fusarium oxysporum OX=5507 PE=1 SV=1;	PF00441.25;PF08028.12;PF02771.17;PF02770.20	GO:0016627;GO:005066	MF:oxidoreductase activity, acting on the CH-CH group of donors;MF:flavin adenine dinucleotide binding;	K19823	NAO	map00910	Nitrogen metabolism
FVER_03569	RKL30660.1	hypothetical protein BFJ72_g11429 [Fusarium proliferatum]	sp|Q8VCI5|PEX19_MOUSE;	Peroxisomal biogenesis factor 19 OS=Mus musculus OX=10090 GN=Pex19 PE=1 SV=1;	PF04614.13	GO:000577	CC:peroxisome;	K13337	PEX19	map04146	Peroxisome
FVER_04128	CVK87295.1	probable allantoicase [Fusarium mangiferae]	sp|P18407|ALLC_NEUCR;	Allantoicase OS=Neurospora crassa;	PF03561.16	GO:0000256;GO:000403	BP:allantoin catabolic process;MF:allantoicase activity;	K01477	alc, ALLC	map00230	Purine metabolism
FVER_04332	CVL05753.1	related to CFT2-cleavage and polyadenylation specificity factor, part of CF II [Fusarium mangiferae]	sp|O74740|CFT2_SCHPO;	Cleavage factor two protein 2 OS=Schizosaccharomyces pombe;	PF16661.6;PF13299.7;PF07521.13;PF10996.9	GO:0006378;GO:0006379;GO:0005847;GO:000372	BP:mRNA polyadenylation;BP:mRNA cleavage;CC:mRNA cleavage and polyadenylation specificity factor complex;MF:RNA binding;	K14402	CPSF2, CFT2	map03015	mRNA surveillance pathway
FVER_04451	RKL46703.1	Peroxisomal biogenesis factor 6 [Fusarium proliferatum]	sp|Q9C1E9|PEX6_COLOR;	Peroxisomal biogenesis factor 6 OS=Colletotrichum orbiculare;	PF00004.30;PF17862.2;PF05496.13;PF13191.7;PF01057.18	GO:000552	MF:ATP binding;	K13339	PEX6, PXAAA1	map04146	Peroxisome
FVER_04665	RKL23525.1	Nucleoporin NUP188 [Fusarium proliferatum]	sp|G0SFH5|NU188_CHATD;	Nucleoporin NUP188 OS=Chaetomium thermophilum;	PF18378.2;PF10487.10	GO:001705	MF:structural constituent of nuclear pore;	K14311	NUP188	map03013	RNA transport
FVER_04845	XP_031075098.1	probable carnitine acetyl transferase FacC [Fusarium proliferatum ET1]	sp|P80235|CACM_YEAST;	Putative mitochondrial carnitine O-acetyltransferase OS=Saccharomyces cerevisiae;	PF00755.21	GO:001674	MF:transferase activity, transferring acyl groups;	K00624	E2.3.1.7	map04146	Peroxisome
FVER_05613	CVK83401.1	related to pyridoxal kinase [Fusarium mangiferae]	sp|O14242|YELB_SCHPO;	Putative pyridoxal kinase C6F6.11c OS=Schizosaccharomyces pombe;	PF08543.13;PF00294.25	GO:0009443;GO:000847	BP:pyridoxal 5'-phosphate salvage;MF:pyridoxal kinase activity;	K00868	pdxK, pdxY	map00750	Vitamin B6 metabolism
FVER_06194	CVL01022.1	related to phosphatidylinositol-glycan biosynthesis, class O protein (PIG-O) [Fusarium mangiferae]	sp|Q74ZS2|GPI13_ASHGO;	GPI ethanolamine phosphate transferase 3 OS=Ashbya gossypii;	PF01575.20	GO:0006506;GO:0016021;GO:005137	BP:GPI anchor biosynthetic process;CC:integral component of membrane;MF:mannose-ethanolamine phosphotransferase activity;	K05288	PIGO	map00563	Glycosylphosphatidylinositol (GPI)-anchor biosynthesis
FVER_06251	KAF4494422.1	ammonia ligase [Fusarium agapanthi]	sp|B3CME9|SUCC_WOLPP;	Succinate--CoA ligase [ADP-forming] subunit beta OS=Wolbachia pipientis subsp. Culex pipiens;	PF00549.20	GO:0044210;GO:0006541;GO:0006099;GO:0003824;GO:0003883;GO:0016874;GO:000552	BP:'de novo' CTP biosynthetic process;BP:glutamine metabolic process;BP:tricarboxylic acid cycle;MF:catalytic activity;MF:CTP synthase activity;MF:ligase activity;MF:ATP binding;	K01900	LSC2	map00020;map00640	Citrate cycle (TCA cycle);Propanoate metabolism
FVER_06252	KLO92886.1	Uncharacterized protein LW93_4040 [Fusarium fujikuroi]	sp|O13750|SUCA_SCHPO;	Succinate--CoA ligase [ADP-forming] subunit alpha, mitochondrial OS=Schizosaccharomyces pombe;	PF02629.20;PF00549.20;PF13607.7;PF13380.7	GO:0006099;GO:0005739;GO:0000166;GO:0003824;GO:0048037;GO:000477	BP:tricarboxylic acid cycle;CC:mitochondrion;MF:nucleotide binding;MF:catalytic activity;MF:cofactor binding;MF:succinate-CoA ligas;	K01899	LSC1	map00020;map00640	Citrate cycle (TCA cycle);Propanoate metabolism
FVER_06652	XP_023423857.1	related to peroxisomal ABC transporter 1 [Fusarium fujikuroi IMI 58289]	sp|P41909|PXA1_YEAST;	Peroxisomal long-chain fatty acid import protein 2 OS=Saccharomyces cerevisiae;	PF06472.16;PF00005.28	GO:0016021;GO:0042626;GO:0016887;GO:000552	CC:integral component of membrane;MF:ATPase activity, coupled to transmembrane movement of substances;MF:ATPase activity;MF:ATP binding;	K15628	PXA	map04146;map02010	Peroxisome;ABC transporters
FVER_06845	KLO92885.1	putative beta-succinyl CoA synthetase precursor [Fusarium fujikuroi]	sp|Q869S7|SUCB2_DICDI;	Succinate--CoA ligase [GDP-forming] subunit beta, mitochondrial OS=Dictyostelium discoideum OX=44689 GN=scsB PE=3 SV=1;	PF08442.11;PF00549.20;PF13549.7;PF16114.6	GO:0006099;GO:0005739;GO:0004775;GO:0000287;GO:000552	BP:tricarboxylic acid cycle;CC:mitochondrion;MF:succinate-CoA ligas;MF:magnesium ion binding;MF:ATP binding;	K01900	LSC2	map00020;map00640	Citrate cycle (TCA cycle);Propanoate metabolism
FVER_07817	CVK89308.1	related to enoyl-CoA-hydratase [Fusarium mangiferae]	sp|Q5ZJ60|HIBCH_CHICK;	3-hydroxyisobutyryl-CoA hydrolase, mitochondrial OS=Gallus gallus OX=9031 GN=HIBCH PE=2 SV=1;	PF16113.6;PF00378.21	GO:0006574;GO:0005739;GO:000386	BP:valine catabolic process;CC:mitochondrion;MF:3-hydroxyisobutyryl-CoA hydrolase activity;	K05605	HIBCH	map00280;map00640;map00410	Valine, leucine and isoleucine degradation;Propanoate metabolism;beta-Alanine metabolism
FVER_08300	CVL04898.1	related to class I alpha-mannosidase 1B [Fusarium mangiferae]	sp|Q0D076|MNS1B_ASPTN;	Probable mannosyl-oligosaccharide alpha-1,2-mannosidase 1B OS=Aspergillus terreus;	PF01532.21	GO:0008152;GO:0016020;GO:0016021;GO:0004571;GO:000550	BP:metabolic process;CC:membrane;CC:integral component of membrane;MF:mannosyl-oligosaccharide 1,2-alpha-mannosidase activity;MF:calcium ion binding;	K01230	MAN1A_C, MNS1_2	map00510;map00513;map04141	N-Glycan biosynthesis;Various types of N-glycan biosynthesis;Protein processing in endoplasmic reticulum
FVER_08330	XP_031067684.1	protein phosphatase [Fusarium oxysporum f. sp. cubense tropical race 4 54006]	sp|P40371|PP2C1_SCHPO;	Protein phosphatase 2C homolog 1 OS=Schizosaccharomyces pombe;	PF00481.22	GO:0046872;GO:000472	MF:metal ion binding;MF:protein serine/threonine phosphatase activity;	K19704	PTC1	map04011	MAPK signaling pathway - yeast
FVER_08661	XP_018748281.1	lactoylglutathione lyase [Fusarium verticillioides 7600]	sp|Q09751|LGUL_SCHPO;	Lactoylglutathione lyase OS=Schizosaccharomyces pombe;	PF00903.26;PF13669.7	GO:0046872;GO:000446	MF:metal ion binding;MF:lactoylglutathione lyase activity;	K01759	GLO1, gloA	map00620	Pyruvate metabolism
FVER_08886	RKL49677.1	hypothetical protein BFJ72_g1135 [Fusarium proliferatum]	sp|P39108|PEX7_YEAST;	Peroxisomal targeting signal 2 receptor OS=Saccharomyces cerevisiae;	PF00400.33	------	------	K13341	PEX7, PTS2R	map04146	Peroxisome
FVER_09153	KAF4438826.1	short-chain alcohol dehydrogenase [Fusarium acutatum]	sp|A3LZU7|RM1DH_PICST;	L-rhamnose-1-dehydrogenase OS=Scheffersomyces stipitis;	PF13561.7;PF00106.26;PF08659.11	------	------	K18337	LRA1	map00051	Fructose and mannose metabolism
FVER_09356	XP_031081307.1	probable alpha-glucosidase (maltase) [Fusarium proliferatum ET1]	sp|Q02751|MALT_CANAX;	Alpha-glucosidase OS=Candida albicans OX=5476 GN=MAL2 PE=1 SV=4;	PF00128.25	GO:0005975;GO:000382	BP:carbohydrate metabolic process;MF:catalytic activity;	K01182	IMA, malL	map00500;map00052	Starch and sucrose metabolism;Galactose metabolism
FVER_09569	EXM18601.1	gluconolactonase [Fusarium oxysporum f. sp. vasinfectum 25433]	------	------	PF08450.13	GO:0016021;GO:001678	CC:integral component of membrane;MF:hydrolase activity;	K01053	E3.1.1.17, gnl, RGN	map00030;map00053	Pentose phosphate pathway;Ascorbate and aldarate metabolism
FVER_09640	XP_023438309.1	uncharacterized protein FFUJ_14101 [Fusarium fujikuroi IMI 58289]	sp|P77526|YFCG_ECOLI;	Disulfide-bond oxidoreductase YfcG OS=Escherichia coli;	PF00043.26;PF14497.7;PF13417.7;PF02798.21;PF13410.7;PF13409.7	------	------	K00799	GST, gst	map00480	Glutathione metabolism
FVER_09899	XP_023434431.1	related to microsomal glutathione S-transferase 3 [Fusarium fujikuroi IMI 58289]	------	------	PF01124.19	GO:0016021;GO:001674	CC:integral component of membrane;MF:transferase activity;	K00799	GST, gst	map00480	Glutathione metabolism
FVER_10141	KAF4502691.1	adenylate kinase [Fusarium agapanthi]	sp|E9P974|KAD3_YEASX;	GTP:AMP phosphotransferase, mitochondrial OS=Saccharomyces cerevisiae OX=4932 GN=ADK2 PE=1 SV=1;	PF00406.23;PF05191.15;PF13207.7	GO:0046039;GO:0046033;GO:0046041;GO:0006172;GO:0005759;GO:0005739;GO:0005524;GO:0046899;GO:0004017;GO:000552	BP:GTP metabolic process;BP:AMP metabolic process;BP:ITP metabolic process;BP:ADP biosynthetic process;CC:mitochondrial matrix;CC:mitochondrion;MF:ATP binding;MF:nucleoside triphosphate adenylate kinase activity;MF:adenylate kinase activity;MF:GTP binding;	K00939	adk, AK	map00730;map00230	Thiamine metabolism;Purine metabolism
FVER_10191	RBA13717.1	dihydroxy-acid dehydratase, mitochondrial [Fusarium proliferatum]	sp|Q10318|ILV3_SCHPO;	Putative dihydroxy-acid dehydratase, mitochondrial OS=Schizosaccharomyces pombe;	PF00920.22	GO:0009082;GO:000416	BP:branched-chain amino acid biosynthetic process;MF:dihydroxy-acid dehydratase activity;	K01687	ilvD	map00770;map00290	Pantothenate and CoA biosynthesis;Valine, leucine and isoleucine biosynthesis
FVER_10918	RKL40507.1	hypothetical protein BFJ72_g6108 [Fusarium proliferatum]	sp|Q9UUE0|CTO1_SCHPO;	CTO1 family protein C17G9.12c OS=Schizosaccharomyces pombe;	PF12710.8;PF00702.27	GO:000636	BP:transcription initiation from RNA polymerase II promoter;	K22911	TH2	map00730	Thiamine metabolism
FVER_11134	XP_023433529.1	probable adenylate kinase [Fusarium fujikuroi IMI 58289]	sp|A4RD93|KAD2_MAGO7;	Adenylate kinase OS=Magnaporthe oryzae;	PF00406.23;PF13207.7;PF05191.15;PF13238.7	GO:0046034;GO:0046033;GO:0006172;GO:0005829;GO:0005758;GO:0005524;GO:000401	BP:ATP metabolic process;BP:AMP metabolic process;BP:ADP biosynthetic process;CC:cytosol;CC:mitochondrial intermembrane space;MF:ATP binding;MF:adenylate kinase activity;	K00939	adk, AK	map00730;map00230	Thiamine metabolism;Purine metabolism
FVER_11141	XP_018246564.1	cell division control protein 48 [Fusarium oxysporum f. sp. lycopersici 4287]	sp|Q5AWS6|CDC48_EMENI;	Cell division control protein 48 OS=Emericella nidulans;	PF00004.30;PF17862.2;PF02359.19;PF05496.13;PF07724.15;PF13191.7;PF07728.15;PF13671.7;PF06068.14;PF02933.18;PF05673.14;PF09336.11	GO:0034067;GO:0051228;GO:0035103;GO:0006511;GO:0051306;GO:0061166;GO:0051301;GO:0005737;GO:0005623;GO:0000790;GO:1990023;GO:0016787;GO:0030674;GO:000552	BP:protein localization to Golgi apparatus;BP:mitotic spindle disassembly;BP:sterol regulatory element binding protein cleavage;BP:ubiquitin-dependent protein catabolic process;BP:mitotic sister chromatid separation;BP:establishment of endoplasmic reticulum localization involved in endoplasmic reticulum polarization at cell division site;BP:cell division;CC:cytoplasm;CC:cell;CC:nuclear chromatin;…	K13525	VCP, CDC48	map04141	Protein processing in endoplasmic reticulum
FVER_11876	SCV33438.1	probable methylcitrate synthase [Fusarium fujikuroi]	sp|C7C436|PRPC_GIBMO;	2-methylcitrate synthase, mitochondrial OS=Gibberella moniliformis OX=117187 GN=mcsA PE=1 SV=1;	PF00285.22	GO:0006099;GO:0006101;GO:0046912;GO:000410	BP:tricarboxylic acid cycle;BP:citrate metabolic process;MF:transferase activity, transferring acyl groups, acyl groups converted into alkyl on transfer;MF:citrat;	K01647	CS, gltA	map00020;map00630	Citrate cycle (TCA cycle);Glyoxylate and dicarboxylate metabolism
FVER_12565	XP_023426945.1	related to 3-hydroxyacyl-CoA dehydratase [Fusarium fujikuroi IMI 58289]	sp|O14346|HACD_SCHPO;	Probable very-long-chain;	PF04387.15	GO:0006633;GO:0016021;GO:0005789;GO:0102158;GO:0102343;GO:0102344;GO:010234	BP:fatty acid biosynthetic process;CC:integral component of membrane;CC:endoplasmic reticulum membrane;MF:very-long-chain 3-hydroxyacyl-CoA dehydratase activity;MF:3-hydroxy-arachidoyl-CoA dehydratase activity;MF:3-hydroxy-behenoyl-CoA dehydratase activity;MF:3-hydroxy-lignoceroyl-CoA dehydratase activity;	K10703;K10599	HACD, PHS1, PAS2;PRPF19, PRP19	map04120;map01040;map00062;map03040	Ubiquitin mediated proteolysis;Biosynthesis of unsaturated fatty acids;Fatty acid elongation;Spliceosome
FVER_12989	XP_018756398.1	citrate synthase, mitochondrial [Fusarium verticillioides 7600]	sp|P34085|CISY_NEUCR;	Citrate synthase, mitochondrial OS=Neurospora crassa;	PF00285.22	GO:0006099;GO:0006101;GO:000410	BP:tricarboxylic acid cycle;BP:citrate metabolic process;MF:citrat;	K01647	CS, gltA	map00020;map00630	Citrate cycle (TCA cycle);Glyoxylate and dicarboxylate metabolism
FVER_13164	RBQ71469.1	hypothetical protein FVER14953_00735 [Fusarium verticillioides]	sp|Q0VCK5|AP2A2_BOVIN;	AP-2 complex subunit alpha-2 OS=Bos taurus OX=9913 GN=AP2A2 PE=1 SV=1;	PF01602.21;PF02296.17;PF02883.21	GO:0006886;GO:0072583;GO:0030122;GO:003561	BP:intracellular protein transport;BP:clathrin-dependent endocytosis;CC:AP-2 adaptor complex;MF:clathrin adaptor activity;	K11824	AP2A	map04144	Endocytosis
FVER_13330	QGJ00523.1	hypothetical protein CEK26_001967 [Fusarium fujikuroi]	sp|Q4R1C4|EBDG_HYPJE;	Exo-beta-D-glucosaminidase OS=Hypocrea jecorina OX=51453 GN=gls93 PE=1 SV=1;	PF18368.2;PF00703.22;PF17753.2	GO:0000272;GO:0005576;GO:005276	BP:polysaccharide catabolic process;CC:extracellular region;MF:exo-1,4-beta-D-glucosaminidase activity;	K15855	csxA	map00520	Amino sugar and nucleotide sugar metabolism
DEGs of Cluster Ⅷ
Gene ID	NR_hit-name	NR_description	Swiss-Prot_hit-name	Swiss-Prot_description	Pfam_id	GO_id	GO_term	KO_id	KO_name	Pathway_id	Pathway_definition
FVER_01584	XP_018753957.1	cyanate hydratase [Fusarium verticillioides 7600]	sp|C7YTF5|CYNS_NECH7;	Cyanate hydratase OS=Nectria haematococca;	PF02560.15;PF13560.7	GO:0009439;GO:0008824;GO:000367	BP:cyanate metabolic process;MF:cyanate hydratase activity;MF:DNA binding;	K01725	cynS	map00910	Nitrogen metabolism
FVER_00509	XP_023434501.1	probable chitin synthase [Fusarium fujikuroi IMI 58289]	sp|Q4P9K9|CHS8_USTMA;	Chitin synthase 8 OS=Ustilago maydis;	PF03142.16;PF00063.22;PF08766.12;PF00173.29;PF13632.7;PF00535.27;PF13641.7	GO:0016021;GO:0016459;GO:0004100;GO:0003779;GO:0003774;GO:000552	CC:integral component of membrane;CC:myosin complex;MF:chitin synthase activity;MF:actin binding;MF:motor activity;MF:ATP binding;	K00698	CHS1	map00520	Amino sugar and nucleotide sugar metabolism
FVER_01000	XP_031072656.1	tyrosine 3-monooxygenase/tryptophan 5-monooxygenase activation protein [Fusarium oxysporum f. sp. cubense tropical race 4 54006]	sp|B8NLM9|ARTA_ASPFN;	14-3-3 family protein artA OS=Aspergillus flavus;	PF00244.21	GO:000449	MF:monooxygenase activity;	K06630	YWHAE	map04011	MAPK signaling pathway - yeast
FVER_02862	RBA20866.1	hypothetical protein FPRO05_08313 [Fusarium proliferatum]	sp|Q49117|Y182_METEA;	Uncharacterized oxidoreductase MexAM1_META1p0182 OS=Methylorubrum extorquens;	PF13561.7;PF00106.26;PF08659.11	GO:001649	MF:oxidoreductase activity;	K00059	fabG, OAR1	map00780;map00061	Biotin metabolism;Fatty acid biosynthesis
FVER_03938	QGI60240.1	hypothetical protein CEK27_004211 [Fusarium fujikuroi]	sp|P87235|RHP42_SCHPO;	DNA repair protein rhp42 OS=Schizosaccharomyces pombe;	PF03835.16;PF10405.10;PF10403.10;PF10404.10	GO:0006289;GO:0005634;GO:0008270;GO:000368	BP:nucleotide-excision repair;CC:nucleus;MF:zinc ion binding;MF:damaged DNA binding;	K10838	XPC	map03420	Nucleotide excision repair
FVER_06234	XP_023437635.1	probable chitin synthase class III, family I [Fusarium fujikuroi IMI 58289]	sp|P29070|CHS1_NEUCR;	Chitin synthase 1 OS=Neurospora crassa;	PF01644.18;PF08407.12;PF03142.16;PF13632.7	GO:0006031;GO:0071555;GO:0016021;GO:0005886;GO:000410	BP:chitin biosynthetic process;BP:cell wall organization;CC:integral component of membrane;CC:plasma membrane;MF:chitin synthase activity;	K00698;cmt	CHS1;	map00520	Amino sugar and nucleotide sugar metabolism
FVER_08232	XP_031089229.1	probable catalase isozyme P [Fusarium proliferatum ET1]	sp|O77229|CATA_DICDI;	Catalase-A OS=Dictyostelium discoideum OX=44689 GN=catA PE=2 SV=2;	PF00199.20;PF06628.13	GO:0042744;GO:0006979;GO:0046872;GO:0020037;GO:000409	BP:hydrogen peroxide catabolic process;BP:response to oxidative stress;MF:metal ion binding;MF:heme binding;MF:catalase activity;	K03781	katE, CAT, catB, srpA	map04213;map00630;map04011;map00380;map04146	Longevity regulating pathway - multiple species;Glyoxylate and dicarboxylate metabolism;MAPK signaling pathway - yeast;Tryptophan metabolism;Peroxisome
FVER_10300	KLO90205.1	putative NADH cytb-reductase [Fusarium fujikuroi]	sp|A2QCV4|NCB5R_ASPNC;	NADH-cytochrome b5 reductase 1 OS=Aspergillus niger;	PF00175.22;PF00970.25;PF00173.29;PF08030.13	GO:0046872;GO:0020037;GO:001649	MF:metal ion binding;MF:heme binding;MF:oxidoreductase activity;	K00326	E1.6.2.2	map00520	Amino sugar and nucleotide sugar metabolism
FVER_10745	CVK90138.1	probable syntaxin, vesicular transport protein [Fusarium mangiferae]	sp|O13644|SED5_SCHPO;	Integral membrane protein sed5 OS=Schizosaccharomyces pombe;	PF05739.20;PF11416.9;PF10241.10	GO:0016192;GO:0016021;GO:001602	BP:vesicle-mediated transport;CC:integral component of membrane;CC:membrane;	K08490	STX5	map04130	SNARE interactions in vesicular transport
FVER_11015	KAF4414799.1	beta-glucosidase [Fusarium acutatum]	sp|Q2U8Y5|BGLI_ASPOR;	Probable beta-glucosidase I OS=Aspergillus oryzae;	PF01915.23;PF00933.22;PF14310.7;PF07691.13	GO:0030245;GO:0102483;GO:000842	BP:cellulose catabolic process;MF:scopolin beta-glucosidase activity;MF:beta-glucosidase activity;	K05349	bglX	map00460;map00500	Cyanoamino acid metabolism;Starch and sucrose metabolism
FVER_11164	XP_031090085.1	probable alpha-L-arabinofuranosidase [Fusarium proliferatum ET1]	sp|O74288|ABFB_EMENI;	Alpha-L-arabinofuranosidase B OS=Emericella nidulans;	PF09206.12;PF05270.14	GO:0031221;GO:0046373;GO:004655	BP:arabinan metabolic process;BP:L-arabinose metabolic process;MF:alpha-L-arabinofuranosidase activity;	K20844	abf1	map00520	Amino sugar and nucleotide sugar metabolism
FVER_13419	CVK92609.1	related to acetyl coenzyme A synthetase [Fusarium mangiferae]	sp|P28812|Y3568_PSEAE;	Uncharacterized protein PA3568 OS=Pseudomonas aeruginosa;	PF00501.29;PF16177.6;PF13193.7	GO:000382	MF:catalytic activity;	K01908	ACSS3, prpE	map00640	Propanoate metabolism
DEGs of Cluster Ⅹ
Gene ID	NR_hit-name	NR_description	Swiss-Prot_hit-name	Swiss-Prot_description	Pfam_id	GO_id	GO_term	KO_id	KO_name	Pathway_id	Pathway_definition
FVER_00019	RKL27357.1	hypothetical protein BFJ72_g13162 [Fusarium proliferatum]	sp|P42058|ALTA7_ALTAL;	Minor allergen Alt a 7 OS=Alternaria alternata OX=5599 GN=ALTA7 PE=1 SV=1;	PF03358.16;PF00258.26;PF02525.18	GO:0003955;GO:001018	MF:NA;MF:FMN binding;	K03809	wrbA	map00130	Ubiquinone and other terpenoid-quinone biosynthesis
FVER_00810	CVL01777.1	probable NADH dehydrogenase (ubiquinone), 64 kD subunit, mitochondrial [Fusarium mangiferae]	sp|F4JJJ3|NDB3_ARATH;	External alternative NA;	PF07992.15;PF00070.28;PF00036.33;PF13405.7;PF13202.7;PF13499.7	GO:0016021;GO:0005509;GO:001649	CC:integral component of membrane;MF:calcium ion binding;MF:oxidoreductase activity;	K03885	ndh	map00190	Oxidative phosphorylation
FVER_00970	KLO95449.1	Uncharacterized protein LW93_7989 [Fusarium fujikuroi]	sp|S0E608|BIK3_GIBF5;	O-methyltransferase bik3 OS=Gibberella fujikuroi;	PF00891.19	GO:0032259;GO:000817	BP:methylation;MF:O-methyltransferase activity;	K18280	FTMD	map00404	Staurosporine biosynthesis
FVER_01727	XP_018760775.1	alcohol oxidase [Fusarium verticillioides 7600]	sp|F2QY27|ALOX1_KOMPC;	Alcohol oxidase 1 OS=Komagataella phaffii;	PF00732.20;PF05199.14;PF05834.13;PF01266.25	GO:0050660;GO:001661	MF:flavin adenine dinucleotide binding;MF:oxidoreductase activity, acting on CH-OH group of donors;	K17066	MOX	map00680	Methane metabolism
FVER_06370	RKL39806.1	hypothetical protein BFJ72_g6533 [Fusarium proliferatum]	sp|Q9UTI7|TYSY_SCHPO;	Probable thymidylate synthase OS=Schizosaccharomyces pombe;	PF02441.20	GO:000382	MF:catalytic activity;	K01598	PPCDC, coaC	map00770	Pantothenate and CoA biosynthesis
FVER_06884	CZS73037.1	unnamed protein product [Fusarium graminearum]	sp|Q556K9|DPM2_DICDI;	Dolichol phosphate-mannose biosynthesis regulatory protein OS=Dictyostelium discoideum OX=44689 GN=dpm2-1 PE=3 SV=1;	PF07297.13;PF08510.13	GO:0006486;GO:0019348;GO:0030176;GO:0030234;GO:001675	BP:protein glycosylation;BP:dolichol metabolic process;CC:integral component of endoplasmic reticulum membrane;MF:enzyme regulator activity;MF:transferase activity, transferring glycosyl groups;	K09658	DPM2	map00510;map00563	N-Glycan biosynthesis;Glycosylphosphatidylinositol (GPI)-anchor biosynthesis
FVER_07019	RBA13681.1	hypothetical protein FPRO05_02474 [Fusarium proliferatum]	sp|D3ZGS3|OCRL_RAT;	Inositol polyphosphate 5-phosphatase OCRL OS=Rattus norvegicus OX=10116 GN=Ocrl PE=1 SV=1;	PF03372.24	GO:0046856;GO:001678	BP:phosphatidylinositol dephosphorylation;MF:hydrolase activity;	K01099	INPP5B_F	map04070;map00562	Phosphatidylinositol signaling system;Inositol phosphate metabolism
FVER_07503	XP_023428256.1	probable DNA helicase RAD25 [Fusarium fujikuroi IMI 58289]	sp|O13768|ERCC3_SCHPO;	General transcription and DNA repair factor IIH helicase subunit XPB OS=Schizosaccharomyces pombe;	PF16203.6;PF13625.7;PF04851.16;PF00271.32;PF00176.24	GO:0006289;GO:0006367;GO:0003678;GO:0005524;GO:000367	BP:nucleotide-excision repair;BP:transcription initiation from RNA polymerase II promoter;MF:DNA helicase activity;MF:ATP binding;MF:DNA binding;	K10843	ERCC3, XPB	map03022;map03420	Basal transcription factors;Nucleotide excision repair
FVER_07617	CVK97350.1	probable chitin synthase [Fusarium mangiferae]	sp|O13395|CHS6_USTMA;	Chitin synthase 6 OS=Ustilago maydis;	PF03142.16;PF08766.12;PF13632.7;PF00173.29;PF13641.7;PF00063.22;PF13506.7	GO:0016459;GO:0016021;GO:0004100;GO:0003774;GO:000552	CC:myosin complex;CC:integral component of membrane;MF:chitin synthase activity;MF:motor activity;MF:ATP binding;	K00698	CHS1	map00520	Amino sugar and nucleotide sugar metabolism
FVER_09182	CVK94387.1	related to beta-glucosidase [Fusarium mangiferae]	sp|Q5BFG8|BGLB_EMENI;	Beta-glucosidase B OS=Emericella nidulans;	PF01915.23;PF00933.22;PF07691.13;PF14310.7	GO:0030245;GO:0102483;GO:000842	BP:cellulose catabolic process;MF:scopolin beta-glucosidase activity;MF:beta-glucosidase activity;	K05349	bglX	map00460;map00500	Cyanoamino acid metabolism;Starch and sucrose metabolism
FVER_09849	KAF4444909.1	UDP-N-acetylglucosamine-dolichyl-phosphate N-acetylglucosaminephosphotransferase [Fusarium acutatum]	sp|P07286|GPT_YEAST;	UDP-N-acetylglucosamine--dolichyl-phosphate N-acetylglucosaminephosphotransferase OS=Saccharomyces cerevisiae;	PF00953.22	GO:0006488;GO:0016021;GO:0008963;GO:000397	BP:dolichol-linked oligosaccharide biosynthetic process;CC:integral component of membrane;MF:phospho-N-acetylmuramoyl-pentapeptide-transferase activity;MF:UDP-N-acetylglucosamine-dolichyl-phosphate N-acetylglucosaminephosphotransferase activity;	K01001	ALG7	map00510	N-Glycan biosynthesis
FVER_10685	XP_018240274.1	S-(hydroxymethyl)glutathione dehydrogenase [Fusarium oxysporum f. sp. lycopersici 4287]	sp|P0CL53|FADH_ASPOR;	S;	PF08240.13;PF00107.27	GO:0006069;GO:0008270;GO:005190	BP:ethanol oxidation;MF:zinc ion binding;MF:S;	K00121	frmA, ADH5, adhC	map00680;map00010;map00071;map00350	Methane metabolism;Glycolysis / Gluconeogenesis;Fatty acid degradation;Tyrosine metabolism
FVER_10843	XP_023429496.1	related to uroporphyrinogen III synthase [Fusarium fujikuroi IMI 58289]	sp|P87214|HEM4_SCHPO;	Uroporphyrinogen-III synthase OS=Schizosaccharomyces pombe;	PF02602.16	GO:0006780;GO:000485	BP:uroporphyrinogen III biosynthetic process;MF:uroporphyrinogen-III synthase activity;	K01719	hemD, UROS	map00860	Porphyrin and chlorophyll metabolism
FVER_12746	XP_023430603.1	related to transcription factor atf1+ [Fusarium fujikuroi IMI 58289]	sp|P52890|ATF1_SCHPO;	Transcription factor atf1 OS=Schizosaccharomyces pombe;	PF11787.9;PF11786.9;PF11785.9;PF00170.22;PF07716.16	GO:0003700;GO:000367	MF:transcription factor activity, sequence-specific DNA binding;MF:DNA binding;	K09051	SKO1, ATF1, PCR1	map04011	MAPK signaling pathway - yeast
FVER_13227	CVL02808.1	probable cellulase precursor [Fusarium mangiferae]	sp|B8MW97|EGLB_ASPFN;	probable endo-beta-1,4-glucanase B OS=Aspergillus flavus;	PF00150.19;PF13204.7	GO:0005975;GO:000455	BP:carbohydrate metabolic process;MF:hydrolase activity, hydrolyzing O-glycosyl compounds;	K01179	E3.2.1.4	map00500	Starch and sucrose metabolism
FVER_13707	XP_023434340.1	related to phosphatidylserine decarboxylase 2 [Fusarium fujikuroi IMI 58289]	sp|P0DPA6|PSID_PSICU;	L-tryptophan decarboxylase OS=Psilocybe cubensis OX=181762 GN=psiD PE=1 SV=1;	PF02798.21;PF13417.7;PF13409.7;PF14497.7;PF13410.7;PF00043.26	GO:0008654;GO:000460	BP:phospholipid biosynthetic process;MF:phosphatidylserine decarboxylase activity;	K00799;K01613	GST, gst;psd, PISD	map00564;map00480	Glycerophospholipid metabolism;Glutathione metabolism
FVER_01579	XP_023425516.1	probable ubiquitin-activating enzyme [Fusarium fujikuroi IMI 58289]	sp|Q8TBC4|UBA3_HUMAN;	NEDD8-activating enzyme E1 catalytic subunit OS=Homo sapiens OX=9606 GN=UBA3 PE=1 SV=2;	PF00899.22;PF08825.11;PF01488.21;PF14732.7	GO:0045116;GO:001978	BP:protein neddylation;MF:NEDD8 activating enzyme activity;	K10686	UBE1C, UBA3	map04120	Ubiquitin mediated proteolysis
FVER_02163	XP_031044289.1	uncharacterized protein FOYG_04435 [Fusarium oxysporum NRRL 32931]	sp|P77526|YFCG_ECOLI;	Disulfide-bond oxidoreductase YfcG OS=Escherichia coli;	PF02798.21;PF00043.26;PF13409.7;PF13410.7;PF13417.7;PF14497.7	------	------	K00799	GST, gst	map00480	Glutathione metabolism
FVER_02369	SCO33669.1	related to dehydrogenase [Fusarium fujikuroi]	sp|Q9WYP5|IOLG_THEMA;	Myo-inositol 2-dehydrogenase OS=Thermotoga maritima;	PF01408.23;PF02894.18	GO:001649	MF:oxidoreductase activity;	K00010	iolG	map00562	Inositol phosphate metabolism
FVER_02811	RBA22014.1	hypothetical protein FPRO05_00361 [Fusarium proliferatum]	sp|Q5AF03|HSP31_CANAL;	Glyoxalase 3 OS=Candida albicans;	PF01965.25	------	------	K22211	GLX3, HSP31	map00620	Pyruvate metabolism
FVER_03548	XP_018752186.1	hypothetical protein FVEG_06622 [Fusarium verticillioides 7600]	sp|Q9P791|YN8C_SCHPO;	Uncharacterized Nudix hydrolase P35G2.12 OS=Schizosaccharomyces pombe;	PF00293.29	GO:0006351;GO:0005634;GO:0016787;GO:0003677;GO:0000981;GO:000827	BP:transcription, DNA-templated;CC:nucleus;MF:hydrolase activity;MF:DNA binding;MF:RNA polymerase II transcription factor activity, sequence-specific DNA binding;MF:zinc ion binding;	K01515	nudF	map00230	Purine metabolism
FVER_03943	XP_018251276.1	hypothetical protein FOXG_12817 [Fusarium oxysporum f. sp. lycopersici 4287]	sp|Q6GMA4|CHM6A_XENLA;	Charged multivesicular body protein 6-A OS=Xenopus laevis OX=8355 GN=chmp6-a PE=2 SV=3;	PF03357.22	GO:000703	BP:vacuolar transport;	K12195	CHMP6, VPS20	map04144	Endocytosis
FVER_04443	XP_023423683.1	uncharacterized protein FFUJ_01911 [Fusarium fujikuroi IMI 58289]	sp|Q9C103|EME1_SCHPO;	Crossover junction endonuclease eme1 OS=Schizosaccharomyces pombe;	PF12396.9;PF00300.23	GO:000382	MF:catalytic activity;	K10882	EME1, MMS4	map03440	Homologous recombination
FVER_05459	CVL08095.1	probable 5-aminolevulinic acid synthase [Fusarium proliferatum]	sp|Q7RVY5|HEM1_NEUCR;	5-aminolevulinate synthase, mitochondrial OS=Neurospora crassa;	PF00155.22;PF01053.21;PF00266.20;PF01041.18	GO:0006782;GO:0005759;GO:0003870;GO:003017	BP:protoporphyrinogen IX biosynthetic process;CC:mitochondrial matrix;MF:5-aminolevulinate synthase activity;MF:pyridoxal phosphate binding;	K00643	E2.3.1.37, ALAS	map00860;map00260	Porphyrin and chlorophyll metabolism;Glycine, serine and threonine metabolism
FVER_05848	XP_023427442.1	probable low-affinity hexose transporter HXT3 [Fusarium fujikuroi IMI 58289]	sp|P38695|HXT5_YEAST;	Probable glucose transporter HXT5 OS=Saccharomyces cerevisiae;	PF00083.25;PF07690.17	GO:0016021;GO:002285	CC:integral component of membrane;MF:transmembrane transporter activity;	K08139	HXT	map04113	Meiosis - yeast
FVER_05925	EXA41854.1	hypothetical protein FOVG_07290 [Fusarium oxysporum f. sp. pisi HDV247]	sp|Q9URV1|PLG7_SCHPO;	Putative phospholipase A2 OS=Schizosaccharomyces pombe;	PF03403.14;PF12740.8	GO:0016042;GO:000384	BP:lipid catabolic process;MF:1-alkyl-2-acetylglycerophosphocholine esterase activity;	K01062	PLA2G7, PAFAH	map00565	Ether lipid metabolism
FVER_06942	RKL47392.1	Ribosome assembly protein 1 [Fusarium proliferatum]	sp|O74945|RIA1_SCHPO;	Ribosome assembly protein 1 OS=Schizosaccharomyces pombe;	PF00009.28;PF00679.25;PF03144.26;PF14492.7	GO:0042256;GO:0005737;GO:0003746;GO:0003924;GO:000552	BP:mature ribosome assembly;CC:cytoplasm;MF:translation elongation factor activity;MF:GTPase activity;MF:GTP binding;	K14536	RIA1	map03008	Ribosome biogenesis in eukaryotes
FVER_09023	RKL26520.1	hypothetical protein BFJ72_g13736 [Fusarium proliferatum]	sp|O13640|YGWH_SCHPO;	Uncharacterized alpha-1,2-galactosyltransferase C8D2.17 OS=Schizosaccharomyces pombe;	PF05637.13	GO:0016021;GO:001675	CC:integral component of membrane;MF:transferase activity, transferring glycosyl groups;	K05532	MNN11	map00513	Various types of N-glycan biosynthesis
FVER_11123	XP_018252965.1	gamma-glutamyltranspeptidase [Fusarium oxysporum f. sp. lycopersici 4287]	sp|O05218|YWRD_BACSU;	Glutathione hydrolase-like YwrD proenzyme OS=Bacillus subtilis;	PF01019.22	GO:001678	MF:hydrolase activity;	K00681	ggt	map00460;map00480;map00430	Cyanoamino acid metabolism;Glutathione metabolism;Taurine and hypotaurine metabolism
FVER_12121	KLP01879.1	STE6-`Full-size` ABC transporter responsible for export of the `a` factor mating pheromon [Fusarium fujikuroi]	sp|P12866|STE6_YEAST;	Alpha-factor-transporting ATPase OS=Saccharomyces cerevisiae;	PF00664.24;PF00005.28;PF02463.20;PF13555.7;PF09818.10	GO:0016021;GO:0042626;GO:0016887;GO:000552	CC:integral component of membrane;MF:ATPase activity, coupled to transmembrane movement of substances;MF:ATPase activity;MF:ATP binding;	K05658	ABCB1, CD243	map02010	ABC transporters
FVER_12345	XP_018755757.1	thiamine pyrophosphokinase [Fusarium verticillioides 7600]	sp|Q60DX1|TPK3_ORYSJ;	Thiamine pyrophosphokinase 3 OS=Oryza sativa subsp. japonica OX=39947 GN=TPK3 PE=2 SV=1;	PF04263.17;PF04265.15	GO:0006772;GO:0009229;GO:0030975;GO:0016301;GO:0004788;GO:000552	BP:thiamine metabolic process;BP:thiamine diphosphate biosynthetic process;MF:thiamine binding;MF:kinase activity;MF:thiamine diphosphokinase activity;MF:ATP binding;	K00949	thiN, TPK1, THI80	map00730	Thiamine metabolism
FVER_13093	RBA12403.1	malate dehydrogenase (oxaloacetate-decarboxylating) [Fusarium proliferatum]	sp|P36013|MAOM_YEAST;	NAD-dependent malic enzyme, mitochondrial OS=Saccharomyces cerevisiae;	PF03949.16;PF00390.20	GO:0051287;GO:0004471;GO:004687	MF:NAD binding;MF:malate dehydrogenas;MF:metal ion binding;	K00027	ME2, sfcA, maeA	map00620	Pyruvate metabolism
FVER_14148	XP_031082899.1	related to transcription initiation factor IIE, beta subunit [Fusarium proliferatum ET1]	sp|P36145|T2EB_YEAST;	Transcription initiation factor IIE subunit beta OS=Saccharomyces cerevisiae;	PF18121.2;PF02186.16	GO:0006367;GO:0005673;GO:0003743;GO:000367	BP:transcription initiation from RNA polymerase II promoter;CC:transcription factor TFIIE complex;MF:translation initiation factor activity;MF:DNA binding;	K03137	TFIIE2, GTF2E2, TFA2	map03022	Basal transcription factors
